# Supplementary material
Source: PubMed Central journal article supplement (PMC3208134)
Supplement: NIHMS305090-supplement-3.pdf [file NIHMS305090-supplement-3.pdf]

| SNP        | Gene Region | Chromosome | Position    | Location        | Coding Status | Amino Acid Change | Major Allele | Minor Allele | Male |           |     |                         | Female  |      |           |      |
|------------|-------------|------------|-------------|-----------------|---------------|-------------------|--------------|--------------|------|-----------|-----|-------------------------|---------|------|-----------|------|
|            |             |            |             |                 |               |                   |              |              | MAF  | Call Rate | HWE | Chi-square              | Exact P | MAF  | Call Rate | HWE  |
| rs157198   | EPB41       | 1          | 29,076,494  | Flanking 5' UTR | -             | -                 | T            | C            | 0.09 | 1.00      |     | 3.61 × 10 <sup>-3</sup> | 0.08    | 1.00 | 0.73      |      |
| rs157220   | EPB41       | 1          | 29,083,883  | Flanking 5' UTR | -             | -                 | G            | A            | 0.36 | 0.99      |     | 1.00                    | 0.38    | 1.00 | 0.92      |      |
| rs126014   | EPB41       | 1          | 29,092,765  | Flanking 3' UTR | -             | -                 | A            | G            | 0.37 | 0.99      |     | 0.91                    | 0.38    | 0.97 | 1.00      |      |
| rs150093   | EPB41       | 1          | 29,101,418  | Flanking 3' UTR | -             | -                 | T            | C            | 0.12 | 1.00      |     | 1.00                    | 0.15    | 1.00 | 0.33      |      |
| rs10915208 | EPB41       | 1          | 29,102,916  | Flanking 3' UTR | -             | -                 | T            | C            | 0.12 | 1.00      |     | 1.00                    | 0.63    | 0.11 | 1.00      | 0.33 |
| rs203298   | EPB41       | 1          | 29,105,251  | Flanking 3' UTR | -             | -                 | C            | G            | 0.09 | 1.00      |     | 0.23                    | 0.08    | 1.00 | 0.51      |      |
| rs203277   | EPB41       | 1          | 29,107,918  | Flanking 3' UTR | -             | -                 | A            | T            | 0.28 | 1.00      |     | 0.38                    | 0.29    | 1.00 | 0.47      |      |
| rs157194   | EPB41       | 1          | 29,108,306  | Flanking 3' UTR | -             | -                 | A            | G            | 0.11 | 1.00      |     | 0.30                    | 0.11    | 1.00 | 0.30      |      |
| rs203278   | EPB41       | 1          | 29,114,784  | Flanking 3' UTR | -             | -                 | T            | C            | 0.35 | 1.00      |     | 0.23                    | 0.34    | 1.00 | 0.83      |      |
| rs157208   | EPB41       | 1          | 29,117,993  | Flanking 3' UTR | -             | -                 | T            | C            | 0.24 | 0.99      |     | 0.89                    | 0.23    | 0.99 | 0.89      |      |
| rs150085   | EPB41       | 1          | 29,120,374  | Flanking 3' UTR | -             | -                 | A            | C            | 0.28 | 1.00      |     | 0.38                    | 0.29    | 1.00 | 0.47      |      |
| rs157213   | EPB41       | 1          | 29,126,858  | Flanking 3' UTR | -             | -                 | C            | G            | 0.11 | 1.00      |     | 0.30                    | 0.11    | 1.00 | 0.60      |      |
| rs150089   | EPB41       | 1          | 29,131,901  | Flanking 3' UTR | -             | -                 | T            | C            | 0.32 | 1.00      |     | 0.49                    | 0.31    | 1.00 | 0.91      |      |
| rs12038347 | EPB41       | 1          | 29,141,303  | Flanking 5' UTR | -             | -                 | A            | G            | 0.11 | 1.00      |     | 0.42                    | 0.10    | 1.00 | 0.26      |      |
| rs204057   | EPB41       | 1          | 29,144,644  | Flanking 5' UTR | -             | -                 | C            | A            | 0.23 | 1.00      |     | 1.00                    | 0.23    | 1.00 | 0.89      |      |
| rs204060   | EPB41       | 1          | 29,152,213  | Flanking 5' UTR | -             | -                 | T            | C            | 0.27 | 1.00      |     | 0.31                    | 0.28    | 1.00 | 0.33      |      |
| rs2985319  | EPB41       | 1          | 29,162,203  | Flanking 5' UTR | -             | -                 | G            | A            | 0.02 | 1.00      |     | 0.11                    | 0.01    | 1.00 | 1.00      |      |
| rs2985322  | EPB41       | 1          | 29,169,054  | Flanking 5' UTR | -             | -                 | T            | C            | 0.32 | 1.00      |     | 0.49                    | 0.31    | 1.00 | 0.82      |      |
| rs2985344  | EPB41       | 1          | 29,176,902  | Flanking 5' UTR | -             | -                 | G            | A            | 0.28 | 1.00      |     | 0.61                    | 0.49    | 1.00 | 0.47      |      |
| rs2762682  | EPB41       | 1          | 29,182,405  | Flanking 5' UTR | -             | -                 | C            | T            | 0.28 | 1.00      |     | 0.38                    | 0.29    | 1.00 | 0.47      |      |
| rs12021667 | EPB41       | 1          | 29,183,661  | Flanking 5' UTR | -             | -                 | T            | C            | 0.40 | 1.00      |     | 0.92                    | 0.39    | 1.00 | 0.84      |      |
| rs2762686  | EPB41       | 1          | 29,188,832  | Intron          | -             | -                 | G            | C            | 0.11 | 1.00      |     | 0.30                    | 0.11    | 1.00 | 0.60      |      |
| rs2985329  | EPB41       | 1          | 29,206,549  | Intron          | -             | -                 | G            | C            | 0.12 | 1.00      |     | 0.48                    | 0.12    | 1.00 | 0.16      |      |
| rs16837840 | EPB41       | 1          | 29,207,867  | Intron          | -             | -                 | A            | C            | 0.11 | 1.00      |     | 0.79                    | 0.10    | 1.00 | 0.27      |      |
| rs2985331  | EPB41       | 1          | 29,207,950  | Intron          | -             | -                 | T            | C            | 0.16 | 1.00      |     | 1.00                    | 0.15    | 1.00 | 1.00      |      |
| rs12072697 | EPB41       | 1          | 29,209,878  | Intron          | -             | -                 | G            | A            | 0.09 | 1.00      |     | 0.23                    | 0.09    | 1.00 | 0.52      |      |
| rs2985332  | EPB41       | 1          | 29,211,686  | Intron          | -             | -                 | A            | G            | 0.15 | 0.96      |     | 0.55                    | 0.15    | 0.98 | 0.23      |      |
| rs2985335  | EPB41       | 1          | 29,218,234  | Intron          | -             | -                 | G            | A            | 0.12 | 1.00      |     | 0.63                    | 0.12    | 1.00 | 0.16      |      |
| rs11807517 | EPB41       | 1          | 29,223,797  | Intron          | -             | -                 | A            | NA           | 0.00 | 1.00      |     | NA                      | 0.00    | 1.00 | NA        |      |
| rs10915216 | EPB41       | 1          | 29,229,250  | Intron          | -             | -                 | T            | A            | 0.50 | 0.99      |     | 0.61                    | 0.49    | 1.00 | 0.16      |      |
| rs2486200  | EPB41       | 1          | 29,236,572  | Intron          | -             | -                 | C            | T            | 0.23 | 1.00      |     | 0.31                    | 0.22    | 1.00 | 0.11      |      |
| rs12027267 | EPB41       | 1          | 29,251,462  | Intron          | -             | -                 | C            | A            | 0.40 | 1.00      |     | 1.00                    | 0.39    | 1.00 | 0.83      |      |
| rs2788888  | EPB41       | 1          | 29,252,579  | Flanking 3' UTR | -             | -                 | G            | A            | 0.23 | 1.00      |     | 0.31                    | 0.22    | 1.00 | 0.09      |      |
| rs2153165  | EPB41       | 1          | 29,258,073  | Flanking 3' UTR | -             | -                 | G            | C            | 0.23 | 1.00      |     | 0.31                    | 0.22    | 1.00 | 0.09      |      |
| rs9426306  | EPB41       | 1          | 29,261,001  | Intron          | -             | -                 | C            | T            | 0.12 | 1.00      |     | 0.48                    | 0.12    | 1.00 | 0.16      |      |
| rs12072831 | EPB41       | 1          | 29,265,747  | Intron          | -             | -                 | G            | A            | 0.14 | 1.00      |     | 0.28                    | 0.14    | 1.00 | 0.09      |      |
| rs12130351 | EPB41       | 1          | 29,269,534  | Intron          | -             | -                 | C            | T            | 0.07 | 1.00      |     | 0.68                    | 0.06    | 1.00 | 0.22      |      |
| rs6702335  | EPB41       | 1          | 29,283,837  | Intron          | -             | -                 | A            | G            | 0.39 | 1.00      |     | 1.00                    | 0.39    | 1.00 | 0.92      |      |
| rs2254241  | EPB41       | 1          | 29,290,620  | Intron          | -             | -                 | G            | A            | 0.12 | 1.00      |     | 0.47                    | 0.12    | 1.00 | 0.15      |      |
| rs12039988 | EPB41       | 1          | 29,298,420  | Flanking 3' UTR | -             | -                 | G            | A            | 0.39 | 1.00      |     | 0.92                    | 0.39    | 1.00 | 0.83      |      |
| rs4654390  | EPB41       | 1          | 29,311,603  | Intron          | -             | -                 | T            | A            | 0.50 | 1.00      |     | 0.61                    | 0.49    | 1.00 | 0.20      |      |
| rs575710   | EPB41       | 1          | 29,319,242  | 3' UTR          | -             | -                 | A            | G            | 0.09 | 1.00      |     | 0.35                    | 0.09    | 1.00 | 0.52      |      |
| rs2452788  | EPB41       | 1          | 29,319,398  | 3' UTR          | -             | -                 | G            | A            | 0.14 | 0.96      |     | 0.30                    | 0.14    | 0.97 | 0.21      |      |
| rs484000   | EPB41       | 1          | 29,324,724  | Flanking 5' UTR | -             | -                 | G            | A            | 0.08 | 0.89      |     | 0.15                    | 0.07    | 0.93 | 0.71      |      |
| rs10914453 | HCRTR1      | 1          | 31,847,623  | Flanking 5' UTR | -             | -                 | G            | A            | 0.38 | 1.00      |     | 0.75                    | 0.41    | 1.00 | 0.76      |      |
| rs3753612  | HCRTR1      | 1          | 31,854,997  | Flanking 5' UTR | -             | -                 | C            | A            | 0.46 | 0.95      |     | 0.35                    | 0.48    | 0.96 | 0.13      |      |
| rs968335   | HCRTR1      | 1          | 31,858,368  | Intron          | -             | -                 | A            | G            | 0.45 | 1.00      |     | 0.76                    | 0.49    | 1.00 | 0.27      |      |
| rs10914456 | HCRTR1      | 1          | 31,860,753  | Intron          | -             | -                 | C            | T            | 0.41 | 0.95      |     | 0.24                    | 0.45    | 0.95 | 0.12      |      |
| rs7516785  | HCRTR1      | 1          | 31,861,808  | Coding Region   | Nonsynonymous | R279Q (NP_001516) | G            | NA           | 0.00 | 1.00      |     | NA                      | 0.00    | 1.00 | NA        |      |
| rs2271933  | HCRTR1      | 1          | 31,865,112  | Coding Region   | Nonsynonymous | I408V (NP_001516) | G            | A            | 0.40 | 1.00      |     | 0.92                    | 0.43    | 1.00 | 0.68      |      |
| rs6703093  | HCRTR1      | 1          | 31,866,148  | Flanking 3' UTR | -             | -                 | T            | C            | 0.46 | 1.00      |     | 0.68                    | 0.48    | 1.00 | 0.23      |      |
| rs10914457 | HCRTR1      | 1          | 31,866,848  | Flanking 3' UTR | -             | -                 | C            | A            | 0.45 | 0.95      |     | 0.61                    | 0.39    | 0.96 | 0.29      |      |
| rs10798880 | HCRTR1      | 1          | 31,869,675  | Intron          | -             | -                 | G            | C            | 0.38 | 1.00      |     | 0.67                    | 0.41    | 1.00 | 0.54      |      |
| rs7546297  | HCRTR1      | 1          | 31,879,081  | Intron          | -             | -                 | G            | A            | 0.37 | 1.00      |     | 0.67                    | 0.41    | 1.00 | 0.54      |      |
| rs7524405  | HCRTR1      | 1          | 31,881,166  | Intron          | -             | -                 | A            | C            | 0.39 | 1.00      |     | 1.00                    | 0.41    | 1.00 | 0.26      |      |
| rs7539745  | CHRN2       | 1          | 152,793,038 | Intron          | -             | -                 | G            | C            | 0.13 | 1.00      |     | 0.49                    | 0.15    | 1.00 | 0.34      |      |
| rs7543174  | CHRN2       | 1          | 152,794,296 | Intron          | -             | -                 | T            | C            | 0.14 | 1.00      |     | 0.53                    | 0.18    | 1.00 | 0.61      |      |
| rs4846552  | CHRN2       | 1          | 152,804,829 | Flanking 5' UTR | -             | -                 | C            | T            | 0.09 | 1.00      |     | 0.19                    | 0.09    | 1.00 | 0.76      |      |
| rs2072658  | CHRN2       | 1          | 152,806,849 | Flanking 5' UTR | -             | -                 | G            | A            | 0.01 | 1.00      |     | 1.00                    | 0.02    | 1.00 | 1.00      |      |
| rs2072659  | CHRN2       | 1          | 152,815,145 | 3' UTR          | -             | -                 | G            | C            | 0.11 | 0.95      |     | 0.59                    | 0.10    | 0.96 | 0.40      |      |
| rs2072660  | CHRN2       | 1          | 152,815,345 | 3' UTR          | -             | -                 | C            | T            | 0.25 | 0.99      |     | 0.23                    | 0.22    | 1.00 | 0.06      |      |
| rs2072661  | CHRN2       | 1          | 152,815,504 | 3' UTR          | -             | -                 | G            | A            | 0.26 | 1.00      |     | 0.19                    | 0.22    | 1.00 | 0.08      |      |
| rs3811450  | CHRN2       | 1          | 152,817,656 | Flanking 3' UTR | -             | -                 | T            | A            | 0.08 | 1.00      |     | 0.71                    | 0.07    | 1.00 | 1.00      |      |
| rs9616     | CHRN2       | 1          | 152,822,355 | 3' UTR          | -             | -                 | A            | T            | 0.29 | 1.00      |     | 1.00                    | 0.27    | 1.00 | 0.71      |      |
| rs1127314  | CHRN2       | 1          | 152,822,890 | 3' UTR          | -             | -                 | A            | G            | 0.31 | 1.00      |     | 0.16                    | 0.29    | 1.00 | 0.54      |      |
| rs1127313  | CHRN2       | 1          | 152,823,049 | 3' UTR          | -             | -                 | G            | A            | 0.46 | 1.00      |     | 0.08                    | 0.47    | 1.00 | 0.55      |      |
| rs2131902  | CHRN2       | 1          | 152,826,222 | Intron          | -             | -                 | T            | C            | 0.32 | 1.00      |     | 0.20                    | 0.30    | 1.00 | 0.55      |      |
| rs3766927  | CHRN2       | 1          | 152,830,765 | Flanking 5' UTR | -             | -                 | C            | T            | 0.31 | 1.00      |     | 0.13                    | 0.29    | 1.00 | 0.55      |      |
| rs6700238  | NTRK1       | 1          | 155,089,868 | Intron          | -             | -                 | A            | NA           | 0.00 | 0.98      |     | NA                      | 0.00    | 0.98 | NA        |      |
| rs1800878  | NTRK1       | 1          | 155,100,893 | Intron          | -             | -                 | G            | T            | 0.02 | 1.00      |     | 1.00                    | 0.03    | 1.00 | 0.30      |      |
| rs1800879  | NTRK1       | 1          | 155,104,765 | Intron          | -             | -                 | C            | T            | 0.38 | 1.00      |     | 0.92                    | 0.36    | 1.00 | 0.83      |      |
| rs6334     | NTRK1       | 1          | 155,112,857 | Coding Region   | Synonymous    | Q558Q (NP_002520) | G            | A            | 0.21 | 1.00      |     | 0.88                    | 0.23    | 1.00 | 0.32      |      |
| rs6336     | NTRK1       | 1          | 155,115,542 | Coding Region   | Nonsynonymous | H604Y (NP_002520) | C            | T            | 0.06 | 1.00      |     | 0.63                    | 0.05    | 1.00 | 1.00      |      |
| rs2644596  | NTRK1       | 1          | 155,118,938 | Flanking 3' UTR | -             | -                 | C            | G            | 0.21 | 1.00      |     | 0.13                    | 0.21    | 1.00 | 0.55      |      |
| rs943551   | NTRK1       | 1          | 155,122,127 | Flanking 3' UTR | -             | -                 | C            | G            | 0.06 | 1.00      |     | 0.06                    | 0.06    | 1.00 | 0.22      |      |
| rs943552   | NTRK1       | 1          | 155,122,242 | Flanking 3' UTR | Nonsynonymous | A16V (XP_371320)  | C            | T            | 0.06 | 1.00      |     | 1.00                    | 0.06    | 1.00 | 0.22      |      |
| rs2768762  | NTRK1       | 1          | 155,127,086 | Flanking 3' UTR | -             | -                 | T            | G            | 0.21 | 1.00      |     | 0.55                    | 0.19    | 1.00 | 0.52      |      |
| rs2644620  | NTRK1       | 1          | 155,127,792 | Flanking 3' UTR | -             | -                 | T            | C            | 0.11 | 1.00      |     | 0.80                    | 0.13    | 1.00 | 0.04      |      |
| rs1186675  | KCNJ9       | 1          | 158,305,708 | Intron          | -             | -                 | G            | A            | 0.12 | 1.00      |     | 0.                      |         |      |           |      |

| SNP        | Gene Region | Chromosome | Position    | Location        | Coding Status | Amino Acid Change | Major Allele | Minor Allele | Male |           |      |            | Female  |      |           |     |
|------------|-------------|------------|-------------|-----------------|---------------|-------------------|--------------|--------------|------|-----------|------|------------|---------|------|-----------|-----|
|            |             |            |             |                 |               |                   |              |              | MAF  | Call Rate | HWE  | Chi-square | Exact P | MAF  | Call Rate | HWE |
| rs16839883 | CREB1       | 2          | 208,137,587 | Flanking 5' UTR | -             | -                 | A            | G            | 0.02 | 1.00      | 0.11 | 0.01       | 1.00    | 1.00 |           |     |
| rs2551921  | CREB1       | 2          | 208,143,800 | Intron          | -             | -                 | T            | C            | 0.20 | 1.00      | 0.88 | 0.18       | 1.00    | 1.00 |           |     |
| rs2551923  | CREB1       | 2          | 208,150,021 | Intron          | -             | -                 | C            | T            | 0.20 | 0.99      | 0.88 | 0.18       | 1.00    | 1.00 |           |     |
| rs7369949  | CREB1       | 2          | 208,159,033 | Intron          | -             | -                 | T            | C            | 0.34 | 1.00      | 0.14 | 0.36       | 1.00    | 0.39 |           |     |
| rs13397461 | CREB1       | 2          | 208,166,082 | Intron          | -             | -                 | A            | NA           | 0.00 | 1.00      | NA   | 0.00       | 1.00    | NA   |           |     |
| rs2551928  | CREB1       | 2          | 208,174,023 | Flanking 3' UTR | -             | -                 | G            | A            | 0.21 | 1.00      | 0.88 | 0.18       | 1.00    | 0.87 |           |     |
| rs1806584  | CREB1       | 2          | 208,174,515 | Flanking 3' UTR | -             | -                 | A            | G            | 0.20 | 0.99      | 0.88 | 0.18       | 1.00    | 1.00 |           |     |
| rs1045780  | CREB1       | 2          | 208,175,395 | Flanking 3' UTR | -             | -                 | G            | A            | 0.20 | 1.00      | 0.88 | 0.18       | 1.00    | 1.00 |           |     |
| rs2551931  | CREB1       | 2          | 208,179,725 | Flanking 3' UTR | -             | -                 | G            | A            | 0.20 | 0.99      | 0.64 | 0.18       | 0.99    | 1.00 |           |     |
| rs7569963  | CREB1       | 2          | 208,181,429 | Flanking 3' UTR | -             | -                 | G            | A            | 0.26 | 1.00      | 0.36 | 0.30       | 1.00    | 0.72 |           |     |
| rs10934253 | DRD3        | 3          | 115,320,474 | Flanking 3' UTR | -             | -                 | A            | T            | 0.02 | 1.00      | 0.13 | 0.02       | 1.00    | 0.21 |           |     |
| rs1385884  | DRD3        | 3          | 115,324,315 | Flanking 3' UTR | -             | -                 | T            | A            | 0.42 | 1.00      | 0.61 | 0.43       | 1.00    | 0.84 |           |     |
| rs2087017  | DRD3        | 3          | 115,324,703 | Flanking 3' UTR | -             | -                 | A            | G            | 0.43 | 1.00      | 0.61 | 0.43       | 1.00    | 0.84 |           |     |
| rs2399496  | DRD3        | 3          | 115,328,703 | Flanking 3' UTR | -             | -                 | A            | T            | 0.48 | 1.00      | 0.54 | 0.47       | 1.00    | 1.00 |           |     |
| rs2134655  | DRD3        | 3          | 115,340,891 | Flanking 3' UTR | -             | -                 | C            | T            | 0.27 | 1.00      | 1.00 | 0.28       | 1.00    | 0.18 |           |     |
| rs963468   | DRD3        | 3          | 115,345,577 | Flanking 3' UTR | -             | -                 | G            | A            | 0.39 | 1.00      | 0.67 | 0.38       | 1.00    | 0.75 |           |     |
| rs324035   | DRD3        | 3          | 115,351,544 | Intron          | -             | -                 | A            | G            | 0.19 | 1.00      | 0.33 | 0.20       | 1.00    | 0.76 |           |     |
| rs3773679  | DRD3        | 3          | 115,352,025 | Intron          | -             | -                 | C            | T            | 0.39 | 1.00      | 1.00 | 0.38       | 1.00    | 0.83 |           |     |
| rs3773678  | DRD3        | 3          | 115,352,768 | Intron          | -             | -                 | G            | A            | 0.14 | 1.00      | 0.09 | 0.15       | 1.00    | 0.11 |           |     |
| rs2630349  | DRD3        | 3          | 115,356,062 | Intron          | -             | -                 | G            | A            | 0.06 | 1.00      | 0.04 | 0.07       | 1.00    | 0.02 |           |     |
| rs2630350  | DRD3        | 3          | 115,357,686 | Intron          | -             | -                 | C            | T            | 0.06 | 1.00      | 0.03 | 0.07       | 1.00    | 0.03 |           |     |
| rs167771   | DRD3        | 3          | 115,358,965 | Intron          | -             | -                 | A            | G            | 0.17 | 1.00      | 0.48 | 0.18       | 1.00    | 0.73 |           |     |
| rs324032   | DRD3        | 3          | 115,360,518 | Intron          | -             | -                 | A            | G            | 0.06 | 1.00      | 0.04 | 0.07       | 1.00    | 0.03 |           |     |
| rs167770   | DRD3        | 3          | 115,362,252 | Intron          | -             | -                 | A            | G            | 0.29 | 1.00      | 0.54 | 0.27       | 1.00    | 0.53 |           |     |
| rs7625282  | DRD3        | 3          | 115,364,217 | Intron          | -             | -                 | A            | G            | 0.27 | 1.00      | 0.90 | 0.25       | 1.00    | 0.28 |           |     |
| rs324029   | DRD3        | 3          | 115,364,313 | Intron          | -             | -                 | G            | A            | 0.29 | 1.00      | 0.63 | 0.27       | 1.00    | 0.53 |           |     |
| rs7633291  | DRD3        | 3          | 115,369,758 | Intron          | -             | -                 | T            | G            | 0.22 | 1.00      | 0.66 | 0.19       | 1.00    | 0.20 |           |     |
| rs324022   | DRD3        | 3          | 115,369,988 | Intron          | -             | -                 | G            | A            | 0.29 | 1.00      | 0.47 | 0.27       | 1.00    | 0.53 |           |     |
| rs1486009  | DRD3        | 3          | 115,371,222 | Intron          | -             | -                 | A            | G            | 0.06 | 1.00      | 1.00 | 0.05       | 1.00    | 1.00 |           |     |
| rs6280     | DRD3        | 3          | 115,373,505 | Coding Region   | Nonsynonymous | S9G (NP_387509)   | T            | C            | 0.34 | 1.00      | 1.00 | 0.33       | 0.99    | 1.00 |           |     |
| rs324026   | DRD3        | 3          | 115,373,732 | Flanking 5' UTR | -             | -                 | T            | C            | 0.33 | 0.99      | 0.73 | 0.33       | 1.00    | 0.91 |           |     |
| rs7638876  | DRD3        | 3          | 115,376,990 | Flanking 3' UTR | -             | -                 | T            | C            | 0.34 | 1.00      | 0.91 | 0.33       | 1.00    | 0.82 |           |     |
| rs9825563  | DRD3        | 3          | 115,382,910 | Flanking 5' UTR | -             | -                 | A            | G            | 0.32 | 0.99      | 0.64 | 0.31       | 1.00    | 0.25 |           |     |
| rs12639080 | DRD3        | 3          | 115,386,481 | Flanking 5' UTR | -             | -                 | G            | A            | 0.35 | 1.00      | 0.91 | 0.34       | 1.00    | 0.44 |           |     |
| rs4678448  | NCK1        | 3          | 138,053,879 | Intron          | -             | -                 | C            | T            | 0.33 | 1.00      | 0.91 | 0.28       | 1.00    | 0.09 |           |     |
| rs1805300  | NCK1        | 3          | 138,058,932 | Flanking 3' UTR | -             | -                 | G            | A            | 0.33 | 1.00      | 0.91 | 0.28       | 1.00    | 0.09 |           |     |
| rs938525   | NCK1        | 3          | 138,064,643 | Intron          | -             | -                 | T            | C            | 0.32 | 1.00      | 0.82 | 0.28       | 1.00    | 0.14 |           |     |
| rs9845460  | NCK1        | 3          | 138,069,807 | Intron          | -             | -                 | G            | A            | 0.24 | 1.00      | 0.49 | 0.18       | 1.00    | 0.32 |           |     |
| rs9818792  | NCK1        | 3          | 138,072,010 | Intron          | -             | -                 | T            | C            | 0.32 | 1.00      | 0.73 | 0.28       | 1.00    | 0.17 |           |     |
| rs12330283 | NCK1        | 3          | 138,073,101 | Intron          | -             | -                 | T            | C            | 0.32 | 1.00      | 0.82 | 0.28       | 1.00    | 0.14 |           |     |
| rs1865149  | NCK1        | 3          | 138,078,300 | Intron          | -             | -                 | A            | G            | 0.32 | 1.00      | 0.82 | 0.28       | 1.00    | 0.14 |           |     |
| rs2343662  | NCK1        | 3          | 138,083,736 | Intron          | -             | -                 | A            | T            | 0.32 | 1.00      | 0.82 | 0.28       | 1.00    | 0.14 |           |     |
| rs9846691  | NCK1        | 3          | 138,088,961 | Intron          | -             | -                 | C            | T            | 0.32 | 1.00      | 1.82 | 0.28       | 1.00    | 0.14 |           |     |
| rs6784005  | NCK1        | 3          | 138,095,451 | Intron          | -             | -                 | G            | C            | 0.32 | 0.91      | 0.62 | 0.29       | 0.90    | 0.13 |           |     |
| rs9824147  | NCK1        | 3          | 138,100,688 | Intron          | -             | -                 | A            | T            | 0.04 | 1.00      | 1.00 | 0.02       | 1.00    | 1.00 |           |     |
| rs9867325  | NCK1        | 3          | 138,101,599 | Intron          | -             | -                 | G            | C            | 0.20 | 1.00      | 0.88 | 0.27       | 1.00    | 0.61 |           |     |
| rs6761993  | NCK1        | 3          | 138,108,592 | Intron          | -             | -                 | T            | C            | 0.39 | 0.99      | 0.67 | 0.38       | 1.00    | 0.17 |           |     |
| rs9837990  | NCK1        | 3          | 138,115,626 | Intron          | -             | -                 | G            | C            | 0.39 | 1.00      | 0.83 | 0.38       | 1.00    | 0.14 |           |     |
| rs9881139  | NCK1        | 3          | 138,116,730 | Intron          | -             | -                 | G            | A            | 0.39 | 1.00      | 0.75 | 0.38       | 1.00    | 0.14 |           |     |
| rs4678274  | NCK1        | 3          | 138,121,927 | Intron          | -             | -                 | G            | T            | 0.32 | 1.00      | 0.82 | 0.28       | 1.00    | 0.14 |           |     |
| rs10935210 | NCK1        | 3          | 138,133,843 | Intron          | -             | -                 | G            | A            | 0.32 | 1.00      | 0.82 | 0.28       | 1.00    | 0.17 |           |     |
| rs6775389  | NCK1        | 3          | 138,142,414 | Intron          | -             | -                 | C            | T            | 0.32 | 1.00      | 0.82 | 0.28       | 1.00    | 0.14 |           |     |
| rs1433318  | NCK1        | 3          | 138,149,144 | Intron          | -             | -                 | T            | C            | 0.32 | 1.00      | 0.91 | 0.28       | 1.00    | 0.17 |           |     |
| rs835648   | NCK1        | 3          | 138,154,194 | Flanking 3' UTR | -             | -                 | T            | A            | 0.32 | 1.00      | 0.49 | 0.27       | 1.00    | 0.38 |           |     |
| rs7648198  | NCK1        | 3          | 138,154,451 | Flanking 3' UTR | -             | -                 | A            | C            | 0.45 | 1.00      | 0.68 | 0.45       | 1.00    | 0.11 |           |     |
| rs835637   | NCK1        | 3          | 138,155,847 | Flanking 5' UTR | -             | -                 | A            | T            | 0.47 | 1.00      | 1.00 | 0.45       | 1.00    | 0.23 |           |     |
| rs835636   | NCK1        | 3          | 138,157,190 | Flanking 5' UTR | -             | -                 | C            | A            | 0.48 | 1.00      | 0.69 | 0.49       | 1.00    | 0.55 |           |     |
| rs835634   | NCK1        | 3          | 138,158,993 | Flanking 5' UTR | -             | -                 | C            | T            | 0.44 | 1.00      | 0.26 | 0.42       | 1.00    | 0.84 |           |     |
| rs12054220 | NCK1        | 3          | 138,160,271 | Intron          | -             | -                 | A            | G            | 0.46 | 1.00      | 0.84 | 0.47       | 1.00    | 0.92 |           |     |
| rs7655090  | DRD5        | 4          | 9,374,973   | Flanking 5' UTR | -             | -                 | A            | G            | 0.31 | 1.00      | 0.91 | 0.33       | 1.00    | 0.74 |           |     |
| rs10939514 | DRD5        | 4          | 9,382,294   | Flanking 5' UTR | -             | -                 | T            | C            | 0.05 | 1.00      | 0.61 | 0.04       | 1.00    | 1.00 |           |     |
| rs10939515 | DRD5        | 4          | 9,382,394   | Flanking 5' UTR | -             | -                 | G            | A            | 0.16 | 1.00      | 1.00 | 0.18       | 1.00    | 0.09 |           |     |
| rs10033951 | DRD5        | 4          | 9,388,678   | Flanking 5' UTR | -             | -                 | C            | T            | 0.30 | 0.99      | 0.72 | 0.32       | 0.98    | 0.73 |           |     |
| rs2867383  | DRD5        | 4          | 9,397,033   | Flanking 3' UTR | -             | -                 | G            | A            | 0.31 | 1.00      | 0.24 | 0.33       | 1.00    | 0.65 |           |     |
| rs1850744  | DRD5        | 4          | 9,399,810   | Flanking 3' UTR | -             | -                 | C            | T            | 0.05 | 0.99      | 0.62 | 0.04       | 0.99    | 1.00 |           |     |
| rs13106539 | DRD5        | 4          | 9,406,801   | Flanking 3' UTR | -             | -                 | T            | C            | 0.38 | 1.00      | 0.29 | 0.38       | 1.00    | 0.67 |           |     |
| rs1519097  | DRD5        | 4          | 9,411,951   | Flanking 3' UTR | -             | -                 | A            | G            | 0.32 | 0.99      | 0.13 | 0.34       | 1.00    | 0.74 |           |     |
| rs356219   | SNCA        | 4          | 90,856,624  | Flanking 3' UTR | -             | -                 | A            | G            | 0.36 | 1.00      | 0.28 | 0.39       | 1.00    | 0.29 |           |     |
| rs11931074 | SNCA        | 4          | 90,858,538  | Flanking 3' UTR | -             | -                 | G            | T            | 0.08 | 1.00      | 0.73 | 0.08       | 1.00    | 0.07 |           |     |
| rs356220   | SNCA        | 4          | 90,860,363  | Flanking 3' UTR | -             | -                 | C            | T            | 0.35 | 0.89      | 0.49 | 0.37       | 0.86    | 0.65 |           |     |
| rs10003708 | SNCA        | 4          | 90,862,074  | Flanking 3' UTR | -             | -                 | C            | A            | 0.08 | 1.00      | 0.73 | 0.08       | 1.00    | 0.07 |           |     |
| rs168552   | SNCA        | 4          | 90,862,167  | Flanking 3' UTR | -             | -                 | T            | C            | 0.29 | 1.00      | 0.39 | 0.31       | 1.00    | 0.64 |           |     |
| rs3857051  | SNCA        | 4          | 90,862,720  | Flanking 3' UTR | -             | -                 | A            | G            | 0.08 | 1.00      | 0.73 | 0.08       | 1.00    | 0.07 |           |     |
| rs356165   | SNCA        | 4          | 90,865,909  | 3' UTR          | -             | -                 | A            | G            | 0.38 | 0.96      | 0.13 | 0.41       | 0.95    | 0.06 |           |     |
| rs10033209 | SNCA        | 4          | 90,872,722  | Intron          | -             | -                 | T            | G            | 0.08 | 1.00      | 0.09 | 0.07       | 0.99    | 0.03 |           |     |
| rs3775423  | SNCA        | 4          | 90,876,514  | Intron          | -             | -                 | C            | T            | 0.08 | 1.00      | 0.72 | 0.07       | 1.00    | 0.06 |           |     |
| rs356204   | SNCA        | 4          | 90,882,565  | Intron          | -             | -                 | C            | T            | 0.44 | 0.93      | 0.83 | 0.46       | 0.94    | 0.12 |           |     |
| rs356203   | SNCA        | 4          | 90,885,064  | Intron          | -             | -                 | T            | C            | 0.37 | 1.00      | 0.28 | 0.39       | 1.00    | 0.21 |           |     |
| rs356168   | SNCA        | 4          | 90,893,454  | Intron          | -             | -                 | A            | G            | 0.46 | 1.00      | 0.84 | 0.48       | 1.00    | 0.16 |           |     |
| rs356198   | SNCA        | 4          | 90,901,527  | Intron          | -             | -                 | C            | T            | 0.20 | 1.00      | 0.35 | 0.18       | 1.00    | 0.06 |           |     |
| rs6834765  | SNCA        | 4          | 90,903,013  | Intron          | -             | -                 | T            | C            | 0.07 | 1.00      | 0.47 | 0.07       | 1.00    | 0.09 |           |     |
| rs356164   | SNCA        | 4          | 90,912,499  | Intron          | -             | -                 | C            | G            | 0.15 | 1.00      | 0.44 | 0.14       | 1.00    | 0.04 |           |     |
| rs3822090  | SNCA        | 4          | 90,923,899  | Intron          | -             | -                 | T            | C            | 0.13 | 1.00      | 0.39 | 0.11       | 1.00    | 0.61 |           |     |
| rs2737033  | SNCA        | 4          | 90,926,970  | Intron          | -             | -                 | T            | C            | 0.27 | 1.00      | 0.20 | 0.30       | 1.00    | 0.08 |           |     |
| rs2737029  | SNCA        | 4          | 90,930,793  | Intron          | -             | -                 | T            | C            | 0.40 | 0.99      | 0.35 | 0.41       | 1.00    | 0.18 |           |     |
| rs10002435 | SNCA        | 4          | 90,931,534  | Intron          | -             | -                 | G            | A            | 0.12 | 1.00      | 0.34 | 0.10       | 1.00    | 0.40 |           |     |
| rs3775443  | SNCA        | 4          | 90,934,697  | Intron          | -             | -                 | T            | G            | 0.07 | 1.00      | 0.71 | 0.05       | 1.00    | 1.00 |           |     |
| rs6532190  | SNCA        | 4          | 90,938,219  | Intron          | -             | -                 | A            | T            | 0.06 | 1.00      | 0.64 | 0.06       | 1.00    | 0.65 |           |     |
| rs2583958  | SNCA        | 4          | 90,939,388  | Intron          | -             | -                 | T            | C            | 0.26 | 1.00      | 0.12 | 0.30       | 1.00    | 0.12 |           |     |
| rs17016188 | SNCA        | 4          | 90,940,903  | Intron          | -             | -                 | T            | C            | 0.06 | 1.00      | 0.64 | 0.06       | 1.00    | 0.65 |           |     |
| rs2619373  | SNCA        | 4          | 90,941,456  | Intron          | -             | -                 | G            | A            | 0.26 | 1.00      | 0.12 | 0.30       | 1.00    | 0.12 |           |     |
| rs17016190 | SNCA        | 4          | 90,941,855  | Intron          | -             | -                 | A            | G            | 0.07 | 1.00      | 0.71 | 0.05       | 1.00    | 1.00 |           |     |
| rs961386   | SNCA        | 4          | 90,951,826  | Intron          | -             | -                 | A            | T            | 0.01 | 1.00      | 1.00 | 0.01       | 1.00    | 1.00 |           |     |
| rs3822095  | SNCA        | 4          | 90,955,540  | Intron          | -             | -                 | T            | C            | 0.37 | 1.00      | 0.24 |            |         |      |           |     |

| SNP        | Gene Region   | Chromosome | Position    | Location        | Coding Status | Amino Acid Change | Major Allele | Minor Allele | Male                    |           |                         |                         | Female |                         |     |                    |
|------------|---------------|------------|-------------|-----------------|---------------|-------------------|--------------|--------------|-------------------------|-----------|-------------------------|-------------------------|--------|-------------------------|-----|--------------------|
|            |               |            |             |                 |               |                   |              |              | MAF                     | Call Rate | HWE                     | Chi-square Exact P      | MAF    | Call Rate               | HWE | Chi-square Exact P |
| rs9044     | <i>TDO2</i>   | 4          | 157,065,537 | 3' UTR          | -             | -                 | A            | G            | 0.46                    | 1.00      | 0.27                    | 0.49                    | 1.00   | 0.16                    |     |                    |
| rs6856354  | <i>TDO2</i>   | 4          | 157,068,548 | Intron          | -             | -                 | A            | C            | 0.36                    | 1.00      | 1.00                    | 0.36                    | 1.00   | 0.91                    |     |                    |
| rs27074    | <i>SLC6A3</i> | 5          | 1,436,550   | Flanking 3' UTR | -             | -                 | C            | T            | 0.09                    | 1.00      | 0.75                    | 0.10                    | 1.00   | 0.41                    |     |                    |
| rs11133762 | <i>SLC6A3</i> | 5          | 1,444,161   | Flanking 3' UTR | -             | -                 | C            | T            | 1.00                    | 1.00      | 1.00                    | 0.01                    | 1.00   | 1.00                    |     |                    |
| rs10064525 | <i>SLC6A3</i> | 5          | 1,445,721   | Flanking 3' UTR | -             | -                 | T            | G            | 0.06                    | 0.99      | 0.66                    | 0.08                    | 0.99   | 0.49                    |     |                    |
| rs40184    | <i>SLC6A3</i> | 5          | 1,448,077   | Intron          | -             | -                 | C            | T            | 0.48                    | 0.98      | 0.05                    | 0.47                    | 1.00   | 1.00                    |     |                    |
| rs11564767 | <i>SLC6A3</i> | 5          | 1,457,704   | Intron          | -             | -                 | A            | T            | 0.06                    | 1.00      | 0.66                    | 0.08                    | 1.00   | 1.00                    |     |                    |
| rs11564764 | <i>SLC6A3</i> | 5          | 1,458,806   | Intron          | -             | -                 | C            | T            | 0.06                    | 1.00      | 0.34                    | 0.07                    | 1.00   | 0.68                    |     |                    |
| rs3776511  | <i>SLC6A3</i> | 5          | 1,460,129   | Intron          | -             | -                 | C            | T            | 0.20                    | 0.92      | 0.42                    | 0.21                    | 0.94   | 0.88                    |     |                    |
| rs6347     | <i>SLC6A3</i> | 5          | 1,464,412   | Coding Region   | Synonymous    | S405S (NP_001035) | T            | C            | 0.26                    | 0.98      | 0.69                    | 0.27                    | 0.99   | 0.71                    |     |                    |
| rs37022    | <i>SLC6A3</i> | 5          | 1,468,629   | Intron          | -             | -                 | A            | T            | 0.17                    | 0.99      | 0.86                    | 0.16                    | 1.00   | 0.35                    |     |                    |
| rs10040882 | <i>SLC6A3</i> | 5          | 1,471,558   | Intron          | -             | -                 | C            | T            | 0.21                    | 0.98      | 0.13                    | 0.23                    | 0.99   | 0.12                    |     |                    |
| rs2975292  | <i>SLC6A3</i> | 5          | 1,472,932   | Intron          | -             | -                 | G            | C            | 0.35                    | 0.95      | 0.37                    | 0.37                    | 0.96   | 0.59                    |     |                    |
| rs458334   | <i>SLC6A3</i> | 5          | 1,483,093   | Intron          | -             | -                 | A            | G            | 0.43                    | 1.00      | 0.06                    | 0.43                    | 1.00   | 0.48                    |     |                    |
| rs456082   | <i>SLC6A3</i> | 5          | 1,483,515   | Intron          | -             | -                 | A            | G            | 0.21                    | 0.99      | 0.54                    | 0.20                    | 1.00   | 0.75                    |     |                    |
| rs11737901 | <i>SLC6A3</i> | 5          | 1,483,616   | Intron          | -             | -                 | C            | T            | 0.34                    | 0.99      | 4.86 × 10 <sup>-4</sup> | 0.32                    | 1.00   | 0.49                    |     |                    |
| rs409588   | <i>SLC6A3</i> | 5          | 1,483,834   | Intron          | -             | -                 | G            | T            | 0.20                    | 1.00      | 0.54                    | 0.20                    | 1.00   | 0.64                    |     |                    |
| rs4975646  | <i>SLC6A3</i> | 5          | 1,486,401   | Intron          | -             | -                 | G            | A            | 0.37                    | 1.00      | 0.13                    | 0.33                    | 1.00   | 0.12                    |     |                    |
| rs403636   | <i>SLC6A3</i> | 5          | 1,491,354   | Intron          | -             | -                 | C            | A            | 0.15                    | 1.00      | 0.33                    | 0.18                    | 1.00   | 1.00                    |     |                    |
| rs6350     | <i>SLC6A3</i> | 5          | 1,496,199   | Coding Region   | Synonymous    | N38N (NP_001035)  | G            | A            | 0.06                    | 1.00      | 0.66                    | 0.05                    | 1.00   | 1.00                    |     |                    |
| rs11564753 | <i>SLC6A3</i> | 5          | 1,496,980   | Intron          | -             | -                 | C            | T            | 0.22                    | 0.99      | 1.65 × 10 <sup>-3</sup> | 0.21                    | 1.00   | 3.63 × 10 <sup>-1</sup> |     |                    |
| rs11564752 | <i>SLC6A3</i> | 5          | 1,497,985   | Intron          | -             | -                 | C            | A            | 0.06                    | 0.96      | 1.00                    | 0.05                    | 0.97   | 7.98 × 10 <sup>-1</sup> |     |                    |
| rs2975226  | <i>SLC6A3</i> | 5          | 1,498,616   | Flanking 5' UTR | -             | -                 | G            | A            | 0.39                    | 0.93      | 0.74                    | 0.39                    | 0.95   | 0.20                    |     |                    |
| rs2652511  | <i>SLC6A3</i> | 5          | 1,499,389   | Flanking 5' UTR | -             | -                 | T            | C            | 0.39                    | 0.99      | 0.67                    | 0.40                    | 0.99   | 0.30                    |     |                    |
| rs6413429  | <i>SLC6A3</i> | 5          | 1,500,027   | Flanking 5' UTR | -             | -                 | C            | A            | 0.07                    | 1.00      | 0.69                    | 0.06                    | 1.00   | 1.00                    |     |                    |
| rs2652510  | <i>SLC6A3</i> | 5          | 1,500,860   | Flanking 5' UTR | -             | -                 | T            | C            | 0.40                    | 1.00      | 1.00                    | 0.40                    | 1.00   | 0.30                    |     |                    |
| rs3756450  | <i>SLC6A3</i> | 5          | 1,501,148   | Flanking 5' UTR | -             | -                 | A            | G            | 0.12                    | 1.00      | 0.47                    | 0.11                    | 1.00   | 0.33                    |     |                    |
| rs12652860 | <i>SLC6A3</i> | 5          | 1,506,772   | Flanking 3' UTR | -             | -                 | C            | A            | 0.28                    | 1.00      | 1.00                    | 0.28                    | 1.00   | 0.09                    |     |                    |
| rs6859392  | <i>HTR1A</i>  | 5          | 63,277,237  | Flanking 3' UTR | -             | -                 | G            | C            | 0.31                    | 1.00      | 1.00                    | 0.30                    | 1.00   | 0.64                    |     |                    |
| rs10085024 | <i>HTR1A</i>  | 5          | 63,284,120  | Flanking 3' UTR | -             | -                 | C            | G            | 0.50                    | 1.00      | 0.48                    | 0.48                    | 1.00   | 0.92                    |     |                    |
| rs1364043  | <i>HTR1A</i>  | 5          | 63,286,607  | Flanking 3' UTR | -             | -                 | T            | G            | 0.25                    | 1.00      | 0.59                    | 0.21                    | 1.00   | 0.14                    |     |                    |
| rs6295     | <i>HTR1A</i>  | 5          | 63,294,321  | Flanking 5' UTR | -             | -                 | C            | G            | 0.49                    | 1.00      | 0.55                    | 0.48                    | 1.00   | 0.84                    |     |                    |
| rs10042486 | <i>HTR1A</i>  | 5          | 63,297,085  | Flanking 5' UTR | -             | -                 | C            | T            | 0.49                    | 0.99      | 0.54                    | 0.48                    | 1.00   | 1.00                    |     |                    |
| rs13436914 | <i>HTR1A</i>  | 5          | 63,297,085  | Flanking 5' UTR | -             | -                 | T            | C            | 1.27 × 10 <sup>-3</sup> | 1.00      | 1.00                    | 1.24 × 10 <sup>-3</sup> | 1.00   | 1.00                    |     |                    |
| rs11954565 | <i>DRD1</i>   | 5          | 174,782,513 | Flanking 3' UTR | -             | -                 | A            | G            | 0.34                    | 0.99      | 0.05                    | 0.36                    | 0.99   | 0.51                    |     |                    |
| rs1587176  | <i>DRD1</i>   | 5          | 174,783,796 | Flanking 3' UTR | -             | -                 | T            | G            | 0.19                    | 1.00      | 0.74                    | 0.15                    | 0.99   | 0.57                    |     |                    |
| rs1310277  | <i>DRD1</i>   | 5          | 174,786,176 | Flanking 3' UTR | -             | -                 | G            | A            | 0.12                    | 1.00      | 0.34                    | 0.13                    | 1.00   | 0.40                    |     |                    |
| rs11739696 | <i>DRD1</i>   | 5          | 174,789,227 | Flanking 3' UTR | -             | -                 | G            | A            | 0.37                    | 1.00      | 0.33                    | 0.37                    | 1.00   | 0.75                    |     |                    |
| rs2453737  | <i>DRD1</i>   | 5          | 174,791,508 | Flanking 3' UTR | -             | -                 | T            | C            | 0.37                    | 1.00      | 0.10                    | 0.38                    | 1.00   | 0.83                    |     |                    |
| rs6881740  | <i>DRD1</i>   | 5          | 174,791,768 | Flanking 3' UTR | -             | -                 | C            | G            | 0.35                    | 1.00      | 0.12                    | 0.36                    | 0.99   | 0.83                    |     |                    |
| rs11742274 | <i>DRD1</i>   | 5          | 174,792,103 | Flanking 3' UTR | -             | -                 | C            | G            | 0.19                    | 1.00      | 0.75                    | 0.19                    | 1.00   | 0.33                    |     |                    |
| rs265971   | <i>DRD1</i>   | 5          | 174,793,017 | Flanking 3' UTR | -             | -                 | T            | C            | 0.28                    | 1.00      | 0.26                    | 0.29                    | 1.00   | 0.18                    |     |                    |
| rs265972   | <i>DRD1</i>   | 5          | 174,793,122 | Flanking 3' UTR | -             | -                 | A            | G            | 0.47                    | 1.00      | 0.61                    | 0.48                    | 1.00   | 0.69                    |     |                    |
| rs265973   | <i>DRD1</i>   | 5          | 174,793,305 | Flanking 3' UTR | -             | -                 | C            | T            | 0.45                    | 1.00      | 8.18 × 10 <sup>-3</sup> | 0.45                    | 1.00   | 0.84                    |     |                    |
| rs265974   | <i>DRD1</i>   | 5          | 174,793,846 | Flanking 3' UTR | -             | -                 | A            | G            | 0.35                    | 1.00      | 0.37                    | 0.34                    | 1.00   | 0.82                    |     |                    |
| rs265975   | <i>DRD1</i>   | 5          | 174,794,801 | Flanking 3' UTR | -             | -                 | C            | T            | 0.34                    | 1.00      | 0.58                    | 0.34                    | 1.00   | 0.91                    |     |                    |
| rs265976   | <i>DRD1</i>   | 5          | 174,795,026 | Flanking 3' UTR | -             | -                 | G            | T            | 0.19                    | 1.00      | 0.33                    | 0.18                    | 1.00   | 0.62                    |     |                    |
| rs10476156 | <i>DRD1</i>   | 5          | 174,795,276 | Flanking 3' UTR | -             | -                 | A            | G            | 0.15                    | 1.00      | 0.32                    | 0.15                    | 1.00   | 0.70                    |     |                    |
| rs265977   | <i>DRD1</i>   | 5          | 174,795,863 | Flanking 3' UTR | -             | -                 | C            | T            | 0.17                    | 0.99      | 0.38                    | 0.17                    | 1.00   | 0.86                    |     |                    |
| rs863126   | <i>DRD1</i>   | 5          | 174,795,954 | Flanking 3' UTR | -             | -                 | A            | T            | 0.32                    | 1.00      | 0.49                    | 0.32                    | 1.00   | 1.00                    |     |                    |
| rs835616   | <i>DRD1</i>   | 5          | 174,796,296 | Flanking 3' UTR | -             | -                 | G            | A            | 0.38                    | 0.99      | 0.07                    | 0.35                    | 0.99   | 0.74                    |     |                    |
| rs835540   | <i>DRD1</i>   | 5          | 174,796,497 | Flanking 3' UTR | -             | -                 | T            | C            | 0.26                    | 1.00      | 1.21 × 10 <sup>-4</sup> | 0.25                    | 1.00   | 5.41 × 10 <sup>-1</sup> |     |                    |
| rs4867796  | <i>DRD1</i>   | 5          | 174,798,127 | Flanking 3' UTR | -             | -                 | A            | C            | 0.16                    | 0.99      | 0.02                    | 0.18                    | 1.00   | 0.30                    |     |                    |
| rs11746641 | <i>DRD1</i>   | 5          | 174,798,697 | Flanking 3' UTR | -             | -                 | T            | G            | 0.16                    | 1.00      | 0.13                    | 0.17                    | 1.00   | 0.29                    |     |                    |
| rs11749676 | <i>DRD1</i>   | 5          | 174,798,904 | Flanking 3' UTR | -             | -                 | G            | A            | 0.41                    | 1.00      | 0.05                    | 0.40                    | 1.00   | 0.10                    |     |                    |
| rs5326     | <i>DRD1</i>   | 5          | 174,802,802 | Intron          | -             | -                 | T            | C            | 0.13                    | 1.00      | 0.27                    | 0.13                    | 1.00   | 0.67                    |     |                    |
| rs265981   | <i>DRD1</i>   | 5          | 174,803,508 | 5' UTR          | -             | -                 | G            | A            | 0.41                    | 0.91      | 6.52 × 10 <sup>-4</sup> | 0.40                    | 0.88   | 5.89 × 10 <sup>-1</sup> |     |                    |
| rs2168631  | <i>DRD1</i>   | 5          | 174,808,608 | Flanking 5' UTR | -             | -                 | G            | A            | 0.17                    | 1.00      | 0.28                    | 0.18                    | 1.00   | 0.73                    |     |                    |
| rs6878159  | <i>DRD1</i>   | 5          | 174,809,007 | Flanking 5' UTR | -             | -                 | A            | T            | 0.10                    | 1.00      | 0.01                    | 8.66 × 10 <sup>-3</sup> | 1.00   | 1.00                    |     |                    |
| rs267417   | <i>DRD1</i>   | 5          | 174,813,120 | Flanking 5' UTR | -             | -                 | T            | C            | 0.40                    | 1.00      | 0.05                    | 0.40                    | 1.00   | 0.35                    |     |                    |
| rs2471005  | <i>DRD1</i>   | 5          | 174,814,813 | Flanking 5' UTR | -             | -                 | G            | A            | 0.40                    | 1.00      | 0.09                    | 0.40                    | 1.00   | 0.35                    |     |                    |
| rs267400   | <i>DRD1</i>   | 5          | 174,815,305 | Flanking 5' UTR | -             | -                 | C            | T            | 0.41                    | 1.00      | 0.76                    | 0.42                    | 1.00   | 0.76                    |     |                    |
| rs11749035 | <i>DRD1</i>   | 5          | 174,815,658 | Flanking 5' UTR | -             | -                 | C            | T            | 0.16                    | 1.00      | 0.12                    | 0.16                    | 1.00   | 0.59                    |     |                    |
| rs267405   | <i>DRD1</i>   | 5          | 174,817,158 | Flanking 5' UTR | -             | -                 | G            | T            | 0.42                    | 1.00      | 0.84                    | 0.42                    | 1.00   | 0.92                    |     |                    |
| rs267406   | <i>DRD1</i>   | 5          | 174,817,347 | Flanking 5' UTR | -             | -                 | G            | T            | 0.42                    | 1.00      | 0.92                    | 0.42                    | 1.00   | 0.92                    |     |                    |
| rs10042051 | <i>DRD1</i>   | 5          | 174,819,467 | Flanking 5' UTR | -             | -                 | A            | G            | 0.02                    | 1.00      | 1.00                    | 9.90 × 10 <sup>-3</sup> | 1.00   | 1.00                    |     |                    |
| rs9396056  | <i>HCRT2</i>  | 6          | 55,141,716  | Flanking 5' UTR | -             | -                 | C            | T            | 0.38                    | 1.00      | 1.00                    | 0.39                    | 1.00   | 0.35                    |     |                    |
| rs9357845  | <i>HCRT2</i>  | 6          | 55,142,145  | Flanking 5' UTR | -             | -                 | G            | C            | 0.38                    | 1.00      | 0.24                    | 0.40                    | 1.00   | 0.54                    |     |                    |
| rs9464203  | <i>HCRT2</i>  | 6          | 55,145,083  | Flanking 5' UTR | -             | -                 | G            | A            | 0.22                    | 1.00      | 0.55                    | 0.21                    | 1.00   | 0.22                    |     |                    |
| rs9382460  | <i>HCRT2</i>  | 6          | 55,145,443  | Flanking 5' UTR | -             | -                 | C            | A            | 0.16                    | 1.00      | 0.86                    | 0.19                    | 1.00   | 0.34                    |     |                    |
| rs9357621  | <i>HCRT2</i>  | 6          | 55,148,249  | Intron          | -             | -                 | A            | T            | 0.44                    | 1.00      | 0.61                    | 0.43                    | 1.00   | 0.19                    |     |                    |
| rs10456181 | <i>HCRT2</i>  | 6          | 55,148,655  | Intron          | -             | -                 | G            | A            | 0.34                    | 1.00      | 0.74                    | 0.36                    | 1.00   | 0.67                    |     |                    |
| rs4364482  | <i>HCRT2</i>  | 6          | 55,148,947  | Intron          | -             | -                 | G            | A            | 0.20                    | 1.00      | 0.34                    | 0.19                    | 1.00   | 0.26                    |     |                    |
| rs6927478  | <i>HCRT2</i>  | 6          | 55,152,345  | Intron          | -             | -                 | T            | G            | 0.37                    | 1.00      | 0.75                    | 0.39                    | 1.00   | 0.75                    |     |                    |
| rs9370399  | <i>HCRT2</i>  | 6          | 55,152,984  | Intron          | -             | -                 | A            | C            | 0.49                    | 1.00      | 0.13                    | 0.44                    | 1.00   | 0.48                    |     |                    |
| rs7768760  | <i>HCRT2</i>  | 6          | 55,153,334  | Intron          | -             | -                 | T            | G            | 0.47                    | 1.00      | 0.31                    | 0.46                    | 1.00   | 0.62                    |     |                    |
| rs7775745  | <i>HCRT2</i>  | 6          | 55,158,466  | Intron          | -             | -                 | G            | A            | 0.45                    | 1.00      | 0.03                    | 0.43                    | 1.00   | 1.00                    |     |                    |
| rs134689   | <i>HCRT2</i>  | 6          | 55,162,711  | Intron          | -             | -                 | A            | G            | 0.20                    | 1.00      | 0.64                    | 0.19                    | 1.00   | 0.26                    |     |                    |
| rs4712099  | <i>HCRT2</i>  | 6          | 55,163,157  | Intron          | -             | -                 | G            | A            | 0.17                    |           |                         |                         |        |                         |     |                    |

| SNP        | Gene Region | Chromosome | Position    | Location        | Coding Status | Amino Acid Change | Major Allele | Minor Allele | Male |           |     |                         | Female                  |      |           |     |
|------------|-------------|------------|-------------|-----------------|---------------|-------------------|--------------|--------------|------|-----------|-----|-------------------------|-------------------------|------|-----------|-----|
|            |             |            |             |                 |               |                   |              |              | MAF  | Call Rate | HWE | Chi-square              | Exact P                 | MAF  | Call Rate | HWE |
| rs2653349  | HCRTR2      | 6          | 55,250,296  | Coding Region   | Nonsynonymous | I308V (NP_001517) | G            | A            | 0.20 | 1.00      |     | 0.52                    | 0.18                    | 1.00 | 0.31      |     |
| rs2653350  | HCRTR2      | 6          | 55,252,061  | Intron          | -             | -                 | A            | G            | 0.46 | 1.00      |     | 0.48                    | 0.42                    | 1.00 | 0.54      |     |
| rs2811228  | HCRTR2      | 6          | 55,260,768  | Flanking 3' UTR | -             | -                 | C            | A            | 0.42 | 1.00      |     | 0.35                    | 0.38                    | 1.00 | 0.60      |     |
| rs10456702 | HCRTR2      | 6          | 55,261,975  | Flanking 3' UTR | -             | -                 | A            | G            | 0.49 | 1.00      |     | 0.69                    | 0.44                    | 1.00 | 0.61      |     |
| rs2653357  | HCRTR2      | 6          | 55,264,698  | Flanking 3' UTR | -             | -                 | G            | A            | 0.42 | 1.00      |     | 0.35                    | 0.38                    | 1.00 | 0.60      |     |
| rs12203487 | HTR1B       | 6          | 78,215,602  | Flanking 3' UTR | -             | -                 | T            | A            | 0.11 | 1.00      |     | 0.29                    | 0.12                    | 1.00 | 0.49      |     |
| rs1145831  | HTR1B       | 6          | 78,217,292  | Flanking 3' UTR | -             | -                 | T            | C            | 0.21 | 1.00      |     | 0.88                    | 0.23                    | 1.00 | 0.57      |     |
| rs12527054 | HTR1B       | 6          | 78,220,647  | Flanking 3' UTR | -             | -                 | T            | C            | 0.08 | 1.00      |     | 1.00                    | 0.07                    | 1.00 | 0.71      |     |
| rs9350712  | HTR1B       | 6          | 78,220,836  | Flanking 3' UTR | -             | -                 | A            | T            | 0.44 | 1.00      |     | 0.41                    | 0.44                    | 1.00 | 0.27      |     |
| rs12527143 | HTR1B       | 6          | 78,221,317  | Flanking 3' UTR | -             | -                 | A            | C            | 0.19 | 1.00      |     | 0.09                    | 0.19                    | 1.00 | 0.52      |     |
| rs9359271  | HTR1B       | 6          | 78,222,839  | Flanking 3' UTR | -             | -                 | A            | C            | 0.27 | 1.00      |     | 1.00                    | 0.29                    | 1.00 | 0.47      |     |
| rs2000292  | HTR1B       | 6          | 78,223,664  | Flanking 3' UTR | -             | -                 | G            | A            | 0.28 | 1.00      |     | 0.80                    | 0.28                    | 1.00 | 0.05      |     |
| rs13212041 | HTR1B       | 6          | 78,227,843  | Flanking 3' UTR | -             | -                 | T            | C            | 0.17 | 1.00      |     | 0.86                    | 0.19                    | 1.00 | 1.00      |     |
| rs6297     | HTR1B       | 6          | 78,228,660  | Flanking 3' UTR | -             | -                 | T            | C            | 0.12 | 1.00      |     | 0.49                    | 0.13                    | 1.00 | 0.83      |     |
| rs6296     | HTR1B       | 6          | 78,228,979  | Coding Region   | Synonymous    | V287V (NP_000854) | C            | G            | 0.28 | 1.00      |     | 0.11                    | 0.28                    | 1.00 | 0.22      |     |
| rs130060   | HTR1B       | 6          | 78,229,469  | Coding Region   | Nonsynonymous | F124C (NP_000854) | A            | C            | 0.02 | 1.00      |     | 1.00                    | 8.66 × 10 <sup>-3</sup> | 1.00 | 1.00      |     |
| rs130058   | HTR1B       | 6          | 78,230,000  | Flanking 5' UTR | -             | -                 | A            | C            | 0.31 | 1.00      |     | 0.64                    | 0.28                    | 1.00 | 0.90      |     |
| rs11568817 | HTR1B       | 6          | 78,230,101  | Flanking 5' UTR | -             | -                 | A            | C            | 0.47 | 1.00      |     | 0.92                    | 0.43                    | 1.00 | 0.69      |     |
| rs1228814  | HTR1B       | 6          | 78,230,539  | Flanking 5' UTR | -             | -                 | G            | T            | 0.46 | 0.98      |     | 0.92                    | 0.43                    | 0.98 | 0.54      |     |
| rs4140535  | HTR1B       | 6          | 78,231,771  | Flanking 5' UTR | -             | -                 | G            | A            | 0.38 | 1.00      |     | 0.20                    | 0.38                    | 1.00 | 0.75      |     |
| rs10806098 | HTR1B       | 6          | 78,232,728  | Flanking 5' UTR | -             | -                 | G            | A            | 0.29 | 1.00      |     | 0.22                    | 0.28                    | 1.00 | 0.22      |     |
| rs1213365  | HTR1B       | 6          | 78,233,274  | Flanking 5' UTR | -             | -                 | G            | C            | 0.47 | 0.92      |     | 0.60                    | 0.49                    | 0.93 | 0.54      |     |
| rs1213366  | HTR1B       | 6          | 78,233,589  | Flanking 5' UTR | -             | -                 | A            | G            | 0.46 | 1.00      |     | 0.84                    | 0.43                    | 1.00 | 0.68      |     |
| rs1213369  | HTR1B       | 6          | 78,234,976  | Flanking 5' UTR | -             | -                 | C            | G            | 0.42 | 1.00      |     | 0.41                    | 0.43                    | 1.00 | 0.76      |     |
| rs1213370  | HTR1B       | 6          | 78,235,516  | Flanking 5' UTR | -             | -                 | C            | G            | 0.45 | 1.00      |     | 1.00                    | 0.47                    | 1.00 | 1.00      |     |
| rs1213371  | HTR1B       | 6          | 78,236,764  | Flanking 5' UTR | -             | -                 | C            | T            | 0.46 | 1.00      |     | 1.00                    | 0.43                    | 0.99 | 0.76      |     |
| rs1936158  | HTR1B       | 6          | 78,241,094  | Flanking 5' UTR | -             | -                 | G            | T            | 0.40 | 1.00      |     | 0.12                    | 0.41                    | 1.00 | 0.84      |     |
| rs12173930 | HTR1B       | 6          | 78,243,153  | Flanking 5' UTR | -             | -                 | C            | T            | 0.11 | 0.99      |     | 0.80                    | 0.13                    | 1.00 | 1.00      |     |
| rs2798949  | HTR1B       | 6          | 78,246,853  | Flanking 5' UTR | -             | -                 | G            | A            | 0.37 | 1.00      |     | 0.45                    | 0.34                    | 1.00 | 0.91      |     |
| rs9352483  | HTR1B       | 6          | 78,246,975  | Flanking 5' UTR | -             | -                 | A            | C            | 0.14 | 1.00      |     | 0.67                    | 0.15                    | 1.00 | 0.44      |     |
| rs4543330  | HTR1B       | 6          | 78,247,352  | Flanking 5' UTR | -             | -                 | A            | C            | 0.15 | 1.00      |     | 0.56                    | 0.15                    | 1.00 | 0.16      |     |
| rs1343491  | JLKB1B      | 6          | 78,247,981  | Flanking 5' UTR | -             | -                 | C            | T            | 0.08 | 1.00      |     | 1.00                    | 0.09                    | 1.00 | 1.00      |     |
| rs6938321  | CNR1        | 6          | 88,892,773  | Flanking 3' UTR | -             | -                 | T            | C            | 0.12 | 1.00      |     | 0.34                    | 0.11                    | 1.00 | 0.20      |     |
| rs9353524  | CNR1        | 6          | 88,894,335  | Flanking 3' UTR | -             | -                 | C            | G            | 0.22 | 0.99      |     | 0.66                    | 0.21                    | 1.00 | 0.18      |     |
| rs10485171 | CNR1        | 6          | 88,900,109  | Flanking 3' UTR | -             | -                 | A            | G            | 0.41 | 1.00      |     | 0.40                    | 0.43                    | 1.00 | 0.84      |     |
| rs806365   | CNR1        | 6          | 88,902,668  | Flanking 3' UTR | -             | -                 | C            | T            | 0.46 | 1.00      |     | 0.10                    | 0.44                    | 0.99 | 0.42      |     |
| rs7766029  | CNR1        | 6          | 88,904,154  | Flanking 3' UTR | -             | -                 | C            | T            | 0.50 | 1.00      |     | 0.55                    | 0.48                    | 1.00 | 0.77      |     |
| rs806366   | CNR1        | 6          | 88,904,308  | Flanking 3' UTR | -             | -                 | C            | T            | 0.49 | 1.00      |     | 0.84                    | 0.49                    | 1.00 | 0.55      |     |
| rs806368   | CNR1        | 6          | 88,906,819  | 3' UTR          | -             | -                 | T            | C            | 0.23 | 0.99      |     | 0.89                    | 0.21                    | 0.99 | 0.14      |     |
| rs1049353  | CNR1        | 6          | 88,910,354  | Coding Region   | Synonymous    | T392T (NP_149421) | C            | T            | 0.25 | 0.99      |     | 1.00                    | 0.26                    | 1.00 | 0.70      |     |
| rs806369   | CNR1        | 6          | 88,912,897  | Flanking 5' UTR | -             | -                 | C            | T            | 0.31 | 1.00      |     | 0.35                    | 0.30                    | 1.00 | 0.72      |     |
| rs806371   | CNR1        | 6          | 88,913,082  | Flanking 5' UTR | -             | -                 | T            | G            | 0.13 | 1.00      |     | 1.00                    | 0.13                    | 1.00 | 1.00      |     |
| rs806374   | CNR1        | 6          | 88,914,039  | Flanking 5' UTR | -             | -                 | A            | T            | 0.35 | 1.00      |     | 0.37                    | 0.35                    | 1.00 | 0.19      |     |
| rs806375   | CNR1        | 6          | 88,915,240  | Flanking 5' UTR | -             | -                 | T            | A            | 0.49 | 1.00      |     | 0.27                    | 0.42                    | 1.00 | 0.76      |     |
| rs806376   | CNR1        | 6          | 88,915,367  | Flanking 5' UTR | -             | -                 | T            | C            | 0.47 | 1.00      |     | 0.42                    | 0.47                    | 1.00 | 0.84      |     |
| rs806377   | CNR1        | 6          | 88,915,442  | Flanking 5' UTR | -             | -                 | C            | T            | 0.44 | 1.00      |     | 0.47                    | 0.49                    | 1.00 | 0.92      |     |
| rs806378   | CNR1        | 6          | 88,916,270  | Flanking 5' UTR | -             | -                 | C            | T            | 0.30 | 0.99      |     | 0.03                    | 0.25                    | 0.98 | 0.89      |     |
| rs2023239  | CNR1        | 6          | 88,917,201  | Flanking 5' UTR | -             | -                 | T            | C            | 0.18 | 1.00      |     | 1.00                    | 0.17                    | 1.00 | 0.72      |     |
| rs806379   | CNR1        | 6          | 88,917,986  | Flanking 5' UTR | -             | -                 | A            | T            | 0.48 | 1.00      |     | 0.61                    | 0.46                    | 1.00 | 0.48      |     |
| rs6454672  | CNR1        | 6          | 88,918,289  | Flanking 5' UTR | -             | -                 | C            | T            | 0.14 | 1.00      |     | 0.67                    | 0.13                    | 1.00 | 0.67      |     |
| rs9444584  | CNR1        | 6          | 88,919,278  | Flanking 5' UTR | -             | -                 | C            | T            | 0.21 | 1.00      |     | 0.23                    | 0.19                    | 1.00 | 0.20      |     |
| rs806381   | CNR1        | 6          | 88,922,620  | Flanking 5' UTR | -             | -                 | A            | G            | 0.36 | 1.00      |     | 0.74                    | 0.30                    | 0.99 | 0.91      |     |
| rs6454673  | CNR1        | 6          | 88,922,768  | Flanking 5' UTR | -             | -                 | G            | A            | 0.33 | 1.00      |     | 0.30                    | 0.28                    | 1.00 | 0.62      |     |
| rs1413753  | EPB41L2     | 6          | 131,192,197 | Flanking 3' UTR | -             | -                 | T            | C            | 0.31 | 1.00      |     | 0.37                    | 0.32                    | 1.00 | 0.17      |     |
| rs2281487  | EPB41L2     | 6          | 131,192,810 | Flanking 3' UTR | -             | -                 | C            | T            | 0.41 | 1.00      |     | 0.25                    | 0.40                    | 1.00 | 1.00      |     |
| rs1413755  | EPB41L2     | 6          | 131,195,892 | Flanking 3' UTR | -             | -                 | C            | T            | 0.38 | 0.99      |     | 0.13                    | 0.37                    | 1.00 | 0.91      |     |
| rs6938735  | EPB41L2     | 6          | 131,196,596 | Flanking 3' UTR | -             | -                 | T            | C            | 0.30 | 1.00      |     | 8.64 × 10 <sup>-3</sup> | 0.30                    | 1.00 | 0.35      |     |
| rs2236081  | EPB41L2     | 6          | 131,196,716 | Flanking 3' UTR | -             | -                 | T            | C            | 0.28 | 1.00      |     | 0.38                    | 0.28                    | 1.00 | 0.09      |     |
| rs6975     | EPB41L2     | 6          | 131,197,795 | Flanking 3' UTR | -             | -                 | G            | T            | 0.24 | 1.00      |     | 0.28                    | 0.27                    | 1.00 | 0.06      |     |
| rs3734186  | EPB41L2     | 6          | 131,199,378 | Flanking 3' UTR | -             | -                 | T            | C            | 0.03 | 1.00      |     | 1.00                    | 0.03                    | 1.00 | 1.00      |     |
| rs988749   | EPB41L2     | 6          | 131,201,181 | Flanking 3' UTR | -             | -                 | T            | G            | 0.29 | 1.00      |     | 0.03                    | 0.29                    | 1.00 | 0.81      |     |
| rs17059669 | EPB41L2     | 6          | 131,201,485 | Flanking 3' UTR | -             | -                 | G            | A            | 0.01 | 1.00      |     | 1.00                    | 0.02                    | 1.00 | 1.00      |     |
| rs6935267  | EPB41L2     | 6          | 131,204,791 | Intron          | -             | -                 | T            | A            | 0.18 | 1.00      |     | 0.01                    | 0.17                    | 1.00 | 0.86      |     |
| rs6919007  | EPB41L2     | 6          | 131,206,179 | Intron          | -             | -                 | A            | T            | 0.38 | 1.00      |     | 0.02                    | 0.36                    | 1.00 | 0.83      |     |
| rs4897468  | EPB41L2     | 6          | 131,206,765 | Intron          | -             | -                 | T            | C            | 0.39 | 1.00      |     | 0.04                    | 0.36                    | 1.00 | 0.91      |     |
| rs4075265  | EPB41L2     | 6          | 131,208,150 | Intron          | -             | -                 | C            | T            | 0.31 | 1.00      |     | 4.15 × 10 <sup>-3</sup> | 0.31                    | 1.00 | 0.35      |     |
| rs10490174 | EPB41L2     | 6          | 131,209,689 | Intron          | -             | -                 | G            | A            | 0.03 | 1.00      |     | 0.37                    | 0.01                    | 1.00 | 1.00      |     |
| rs9402292  | EPB41L2     | 6          | 131,211,966 | Intron          | -             | -                 | A            | G            | 0.38 | 0.99      |     | 0.02                    | 0.36                    | 1.00 | 0.83      |     |
| rs928592   | EPB41L2     | 6          | 131,219,792 | Intron          | -             | -                 | G            | A            | 0.27 | 1.00      |     | 0.04                    | 0.30                    | 1.00 | 0.02      |     |
| rs10457561 | EPB41L2     | 6          | 131,223,025 | Intron          | -             | -                 | T            | C            | 0.14 | 1.00      |     | 0.69                    | 0.17                    | 1.00 | 0.21      |     |
| rs6569709  | EPB41L2     | 6          | 131,223,739 | Intron          | -             | -                 | C            | T            | 0.31 | 1.00      |     | 8.98 × 10 <sup>-3</sup> | 0.31                    | 1.00 | 0.56      |     |
| rs933063   | EPB41L2     | 6          | 131,225,408 | Intron          | -             | -                 | C            | T            | 0.30 | 1.00      |     | 0.09                    | 0.33                    | 1.00 | 0.31      |     |
| rs3777432  | EPB41L2     | 6          | 131,225,509 | Intron          | -             | -                 | G            | A            | 0.15 | 1.00      |     | 0.54                    | 0.17                    | 1.00 | 0.15      |     |
| rs915172   | EPB41L2     | 6          | 131,226,463 | Intron          | -             | -                 | T            | G            | 0.29 | 1.00      |     | 0.47                    | 0.32                    | 1.00 | 0.07      |     |
| rs7775013  | EPB41L2     | 6          | 131,228,271 | Intron          | -             | -                 | T            | G            | 0.39 | 1.00      |     | 0.11                    | 0.36                    | 1.00 | 0.91      |     |
| rs17059736 | EPB41L2     | 6          | 131,232,531 | Coding Region   | -             | -                 | G            | A            | 0.12 | 1.00      |     | 0.63                    | 0.14                    | 1.00 | 0.40      |     |
| rs3777438  | EPB41L2     | 6          | 131,241,795 | Intron          | -             | -                 | C            | A            | 0.17 | 0.97      |     | 0.86                    | 0.17                    | 0.98 | 0.37      |     |
| rs3822859  | EPB41L2     | 6          | 131,248,402 | Intron          | -             | -                 | A            | T            | 0.01 | 1.00      |     | 1.00                    | 0.02                    | 1.00 | 1.00      |     |

| SNP        | Gene Region | Chromosome | Position    | Location        | Coding Status | Amino Acid Change | Major Allele | Minor Allele | Male                    |           |     |                    | Female                  |           |                         |                    |
|------------|-------------|------------|-------------|-----------------|---------------|-------------------|--------------|--------------|-------------------------|-----------|-----|--------------------|-------------------------|-----------|-------------------------|--------------------|
|            |             |            |             |                 |               |                   |              |              | MAF                     | Call Rate | HWE | Chi-square Exact P | MAF                     | Call Rate | HWE                     | Chi-square Exact P |
| rs589046   | OPRM1       | 6          | 154,434,831 | Intron          | -             | -                 | C            | T            | 0.26                    | 1.00      |     | 0.24               | 0.23                    | 1.00      | 0.78                    |                    |
| rs1381376  | OPRM1       | 6          | 154,434,951 | Intron          | -             | -                 | C            | T            | 0.16                    | 1.00      |     | 1.00               | 0.15                    | 1.00      | 0.55                    |                    |
| rs3778151  | OPRM1       | 6          | 154,435,373 | Intron          | -             | -                 | T            | C            | 0.16                    | 1.00      |     | 0.85               | 0.15                    | 1.00      | 0.56                    |                    |
| rs17209711 | OPRM1       | 6          | 154,438,148 | Intron          | -             | -                 | T            | A            | 0.16                    | 1.00      |     | 0.70               | 0.14                    | 1.00      | 0.42                    |                    |
| rs3778155  | OPRM1       | 6          | 154,445,511 | Intron          | -             | -                 | C            | T            | 0.16                    | 0.97      |     | 0.57               | 0.16                    | 0.97      | 0.56                    |                    |
| rs3778158  | OPRM1       | 6          | 154,447,423 | Intron          | -             | -                 | A            | T            | 0.15                    | 1.00      |     | 1.00               | 0.15                    | 1.00      | 0.55                    |                    |
| rs63649    | OPRM1       | 6          | 154,449,660 | Intron          | -             | -                 | C            | T            | 0.10                    | 1.00      |     | 0.57               | 0.08                    | 1.00      | 0.72                    |                    |
| rs9322446  | OPRM1       | 6          | 154,450,395 | Intron          | -             | -                 | G            | A            | 0.14                    | 1.00      |     | 0.14               | 0.16                    | 1.00      | 0.85                    |                    |
| rs9479757  | OPRM1       | 6          | 154,453,037 | Flanking 3' UTR | -             | -                 | G            | A            | 0.17                    | 1.00      |     | 0.77               | 0.09                    | 1.00      | 0.54                    |                    |
| rs2075572  | OPRM1       | 6          | 154,453,697 | Flanking 5' UTR | -             | -                 | C            | G            | 0.45                    | 1.00      |     | 0.84               | 0.40                    | 1.00      | 0.35                    |                    |
| rs510587   | OPRM1       | 6          | 154,455,121 | Flanking 3' UTR | -             | -                 | G            | A            | 0.05                    | 1.00      |     | 1.00               | 0.05                    | 1.00      | 0.29                    |                    |
| rs9282821  | OPRM1       | 6          | 154,456,068 | Flanking 5' UTR | -             | -                 | C            | A            | 0.44                    | 1.00      |     | 0.76               | 0.39                    | 1.00      | 0.41                    |                    |
| rs540825   | OPRM1       | 6          | 154,456,139 | Coding Region   | -             | -                 | T            | A            | 0.26                    | 1.00      |     | 0.52               | 0.24                    | 1.00      | 0.89                    |                    |
| rs548646   | OPRM1       | 6          | 154,459,840 | Flanking 3' UTR | -             | -                 | C            | T            | 0.35                    | 1.00      |     | 1.00               | 0.33                    | 1.00      | 0.50                    |                    |
| rs3798683  | OPRM1       | 6          | 154,460,107 | Flanking 3' UTR | -             | -                 | A            | G            | 0.14                    | 1.00      |     | 0.68               | 0.16                    | 1.00      | 0.57                    |                    |
| rs599548   | OPRM1       | 6          | 154,460,254 | Flanking 3' UTR | -             | -                 | G            | A            | 0.13                    | 1.00      |     | 0.51               | 0.13                    | 1.00      | 0.27                    |                    |
| rs9322447  | OPRM1       | 6          | 154,466,013 | Flanking 3' UTR | -             | -                 | A            | G            | 0.49                    | 1.00      |     | 0.42               | 0.46                    | 1.00      | 0.84                    |                    |
| rs618207   | OPRM1       | 6          | 154,466,362 | Flanking 3' UTR | -             | -                 | G            | A            | 0.35                    | 1.00      |     | 1.00               | 0.33                    | 1.00      | 0.43                    |                    |
| rs1853384  | OPRM1       | 6          | 154,466,651 | Flanking 3' UTR | -             | -                 | C            | T            | 0.35                    | 1.00      |     | 1.00               | 0.33                    | 1.00      | 0.43                    |                    |
| rs623956   | OPRM1       | 6          | 154,471,718 | Flanking 5' UTR | -             | -                 | A            | G            | 0.25                    | 0.95      |     | 0.59               | 0.24                    | 0.95      | 0.78                    |                    |
| rs504932   | OPRM1       | 6          | 154,472,161 | Flanking 5' UTR | -             | -                 | A            | G            | 0.25                    | 1.00      |     | 0.51               | 0.24                    | 1.00      | 1.00                    |                    |
| rs609148   | OPRM1       | 6          | 154,472,707 | Flanking 5' UTR | -             | -                 | G            | A            | 0.25                    | 1.00      |     | 0.51               | 0.24                    | 1.00      | 1.00                    |                    |
| rs606148   | OPRM1       | 6          | 154,477,679 | Flanking 5' UTR | -             | -                 | C            | A            | 0.10                    | 1.00      |     | 1.00               | 0.09                    | 1.00      | 0.55                    |                    |
| rs632395   | OPRM1       | 6          | 154,478,944 | Flanking 5' UTR | -             | -                 | G            | A            | 0.10                    | 1.00      |     | 1.00               | 0.09                    | 1.00      | 0.55                    |                    |
| rs648893   | OPRM1       | 6          | 154,480,321 | Flanking 5' UTR | -             | -                 | A            | G            | 0.25                    | 0.99      |     | 0.50               | 0.24                    | 1.00      | 1.00                    |                    |
| rs1323041  | OPRM1       | 6          | 154,480,873 | Flanking 5' UTR | -             | -                 | G            | A            | 0.49                    | 1.00      |     | 0.48               | 0.46                    | 1.00      | 0.84                    |                    |
| rs512053   | OPRM1       | 6          | 154,481,209 | Flanking 5' UTR | -             | -                 | G            | T            | 0.08                    | 1.00      |     | 0.72               | 0.09                    | 1.00      | 0.06                    |                    |
| rs642489   | OPRM1       | 6          | 154,484,368 | Flanking 3' UTR | -             | -                 | T            | G            | 0.25                    | 1.00      |     | 0.51               | 0.24                    | 1.00      | 1.00                    |                    |
| rs613341   | OPRM1       | 6          | 154,484,971 | Flanking 3' UTR | -             | -                 | C            | T            | 0.09                    | 1.00      |     | 1.00               | 0.09                    | 1.00      | 0.52                    |                    |
| rs10485058 | OPRM1       | 6          | 154,486,907 | Flanking 3' UTR | -             | -                 | A            | G            | 0.14                    | 1.00      |     | 0.40               | 0.15                    | 1.00      | 1.00                    |                    |
| rs613355   | OPRM1       | 6          | 154,491,542 | Flanking 3' UTR | -             | -                 | A            | C            | 0.36                    | 1.00      |     | 1.00               | 0.33                    | 1.00      | 0.37                    |                    |
| rs3735275  | DDC         | 7          | 50,484,765  | 5' UTR          | -             | -                 | A            | G            | 0.15                    | 1.00      |     | 0.33               | 0.19                    | 1.00      | 1.00                    |                    |
| rs4947510  | DDC         | 7          | 50,492,914  | Flanking 3' UTR | -             | -                 | G            | A            | 0.27                    | 1.00      |     | 0.16               | 0.32                    | 1.00      | 0.21                    |                    |
| rs4947511  | DDC         | 7          | 50,493,367  | Flanking 3' UTR | -             | -                 | G            | A            | 5.08 × 10 <sup>-3</sup> | 1.00      |     | 1.00               | 4.95 × 10 <sup>-3</sup> | 1.00      | 1.00                    |                    |
| rs11575553 | DDC         | 7          | 50,493,713  | 3' UTR          | -             | -                 | G            | A            | 0.10                    | 1.00      |     | 0.26               | 0.11                    | 1.00      | 0.61                    |                    |
| rs4947535  | DDC         | 7          | 50,499,175  | Intron          | -             | -                 | A            | T            | 0.27                    | 1.00      |     | 0.25               | 0.30                    | 1.00      | 0.15                    |                    |
| rs730092   | DDC         | 7          | 50,503,248  | Intron          | -             | -                 | G            | C            | 0.40                    | 1.00      |     | 0.21               | 0.45                    | 1.00      | 0.31                    |                    |
| rs11238131 | DDC         | 7          | 50,506,083  | Intron          | -             | -                 | C            | T            | 0.27                    | 1.00      |     | 0.25               | 0.30                    | 1.00      | 0.15                    |                    |
| rs7803247  | DDC         | 7          | 50,508,237  | Intron          | -             | -                 | C            | T            | 0.40                    | 0.99      |     | 0.21               | 0.45                    | 1.00      | 0.31                    |                    |
| rs11771818 | DDC         | 7          | 50,509,669  | Intron          | -             | -                 | G            | A            | 0.13                    | 1.00      |     | 0.27               | 0.13                    | 1.00      | 0.83                    |                    |
| rs11772714 | DDC         | 7          | 50,510,337  | Intron          | -             | -                 | A            | G            | 0.19                    | 1.00      |     | 0.51               | 0.21                    | 1.00      | 0.65                    |                    |
| rs11238133 | DDC         | 7          | 50,510,408  | Intron          | -             | -                 | C            | A            | 0.30                    | 0.97      |     | 0.07               | 0.36                    | 0.98      | 8.49 × 10 <sup>-1</sup> |                    |
| rs732215   | DDC         | 7          | 50,511,557  | Intron          | -             | -                 | A            | C            | 0.47                    | 1.00      |     | 0.24               | 0.42                    | 1.00      | 0.61                    |                    |
| rs896309   | DDC         | 7          | 50,512,511  | Intron          | -             | -                 | A            | G            | 0.19                    | 1.00      |     | 0.76               | 0.21                    | 1.00      | 0.51                    |                    |
| rs4579483  | DDC         | 7          | 50,513,594  | Intron          | -             | -                 | T            | C            | 0.39                    | 1.00      |     | 0.34               | 0.43                    | 1.00      | 0.42                    |                    |
| rs11575453 | DDC         | 7          | 50,515,359  | Intron          | -             | -                 | C            | T            | 0.08                    | 1.00      |     | 0.09               | 0.08                    | 1.00      | 0.18                    |                    |
| rs4947577  | DDC         | 7          | 50,516,103  | Intron          | -             | -                 | C            | G            | 0.39                    | 0.99      |     | 0.53               | 0.43                    | 1.00      | 0.54                    |                    |
| rs17152020 | DDC         | 7          | 50,517,353  | Intron          | -             | -                 | T            | A            | 0.20                    | 1.00      |     | 0.76               | 0.22                    | 1.00      | 0.89                    |                    |
| rs1451372  | DDC         | 7          | 50,521,365  | Intron          | -             | -                 | G            | C            | 0.39                    | 1.00      |     | 0.46               | 0.43                    | 1.00      | 0.48                    |                    |
| rs7790758  | DDC         | 7          | 50,529,038  | Intron          | -             | -                 | A            | G            | 0.19                    | 1.00      |     | 0.51               | 0.21                    | 1.00      | 0.76                    |                    |
| rs4602840  | DDC         | 7          | 50,530,315  | Intron          | -             | -                 | C            | A            | 0.12                    | 1.00      |     | 0.23               | 0.14                    | 1.00      | 0.04                    |                    |
| rs1037351  | DDC         | 7          | 50,532,898  | Intron          | -             | -                 | T            | C            | 0.34                    | 1.00      |     | 0.65               | 0.35                    | 1.00      | 0.38                    |                    |
| rs11575383 | DDC         | 7          | 50,535,184  | Intron          | -             | -                 | C            | A            | 0.07                    | 1.00      |     | 0.25               | 0.07                    | 1.00      | 0.12                    |                    |
| rs896307   | DDC         | 7          | 50,536,554  | Intron          | -             | -                 | C            | T            | 0.19                    | 1.00      |     | 0.51               | 0.21                    | 1.00      | 0.77                    |                    |
| rs880028   | DDC         | 7          | 50,537,630  | Intron          | -             | -                 | A            | G            | 0.20                    | 0.99      |     | 0.20               | 0.22                    | 1.00      | 0.89                    |                    |
| rs4947584  | DDC         | 7          | 50,540,203  | Intron          | -             | -                 | A            | T            | 0.35                    | 0.99      |     | 0.83               | 0.37                    | 1.00      | 0.29                    |                    |
| rs6592961  | DDC         | 7          | 50,540,384  | Intron          | -             | -                 | G            | A            | 0.21                    | 1.00      |     | 0.88               | 0.23                    | 1.00      | 0.89                    |                    |
| rs12718574 | DDC         | 7          | 50,541,342  | Intron          | -             | -                 | G            | C            | 0.45                    | 1.00      |     | 1.00               | 0.41                    | 1.00      | 0.76                    |                    |
| rs1817074  | DDC         | 7          | 50,541,506  | Intron          | -             | -                 | T            | C            | 0.36                    | 1.00      |     | 0.51               | 0.38                    | 1.00      | 0.67                    |                    |
| rs17635123 | DDC         | 7          | 50,543,469  | Intron          | -             | -                 | T            | C            | 0.12                    | 1.00      |     | 0.22               | 0.14                    | 1.00      | 0.09                    |                    |
| rs1470750  | DDC         | 7          | 50,544,142  | Intron          | -             | -                 | C            | G            | 0.43                    | 1.00      |     | 0.47               | 0.39                    | 1.00      | 0.53                    |                    |
| rs2100280  | DDC         | 7          | 50,548,330  | Intron          | -             | -                 | A            | G            | 0.25                    | 0.97      |     | 0.68               | 0.27                    | 0.99      | 0.10                    |                    |
| rs1451368  | DDC         | 7          | 50,555,261  | Intron          | -             | -                 | C            | T            | 0.26                    | 1.00      |     | 0.36               | 0.28                    | 1.00      | 0.21                    |                    |
| rs10244632 | DDC         | 7          | 50,566,197  | Intron          | -             | -                 | C            | T            | 0.27                    | 0.96      |     | 0.07               | 0.30                    | 0.96      | 0.14                    |                    |
| rs896307   | DDC         | 7          | 50,572,601  | Intron          | -             | -                 | C            | G            | 0.10                    | 1.00      |     | 0.25               | 0.12                    | 1.00      | 0.03                    |                    |
| rs11575321 | DDC         | 7          | 50,572,602  | Intron          | -             | -                 | T            | C            | 0.10                    | 1.00      |     | 0.24               | 0.12                    | 1.00      | 0.03                    |                    |
| rs11575313 | DDC         | 7          | 50,573,662  | Intron          | -             | -                 | C            | T            | 0.14                    | 0.94      |     | 0.27               | 0.13                    | 0.95      | 0.82                    |                    |
| rs10268819 | DDC         | 7          | 50,577,565  | Intron          | -             | -                 | G            | A            | 0.20                    | 0.88      |     | 0.40               | 0.21                    | 0.92      | 0.53                    |                    |
| rs3807552  | DDC         | 7          | 50,578,236  | Intron          | -             | -                 | G            | A            | 0.20                    | 0.88      |     | 0.27               | 0.21                    | 0.92      | 0.53                    |                    |
| rs379078   | DDC         | 7          | 50,578,412  | Intron          | -             | -                 | C            | T            | 0.19                    | 1.00      |     | 1.00               | 0.21                    | 1.00      | 0.88                    |                    |
| rs6264     | DDC         | 7          | 50,579,229  | Coding Region   | Nonsynonymous | V17M (NP_000781)  | C            | NA           | 0.00                    | 1.00      |     | NA                 | 0.00                    | 1.00      | NA                      |                    |
| rs2044859  | DDC         | 7          | 50,580,056  | Intron          | -             | -                 | A            | G            | 0.34                    | 1.00      |     | 1.00               | 0.37                    | 1.00      | 0.91                    |                    |
| rs7786398  | DDC         | 7          | 50,580,400  | Intron          | -             | -                 | A            | G            | 0.44                    | 1.00      |     | 1.00               | 0.48                    | 1.00      | 0.49                    |                    |
| rs10276473 | DDC         | 7          | 50,580,491  | Intron          | -             | -                 | G            | T            | 0.20                    | 1.00      |     | 0.87               | 0.21                    | 1.00      | 0.46                    |                    |
| rs11765748 | DDC         | 7          | 50,583,110  | Intron          | -             | -                 | A            | T            | 0.48                    | 1.00      |     | 0.36               | 0.49                    | 1.00      | 0.84                    |                    |
| rs7456339  | DDC         | 7          | 50,583,334  | Intron          | -             | -                 | A            | G            | 0.13                    | 1.00      |     | 0.02               | 0.15                    | 1.00      | 0.04                    |                    |
| rs1049695  | DDC         | 7          | 50,586,098  | Intron          | -             | -                 | C            | T            | 0.49                    | 1.00      |     | 0.42               | 0.49                    | 1.00      | 1.00                    |                    |
| rs4947644  | DDC         | 7          | 50,586,370  | Intron          | -             | -                 | T            | C            | 0.42                    | 1.00      |     | 0.42               | 0.48                    | 1.00      | 0.92                    |                    |
| rs2329340  | DDC         | 7          | 50,587,723  | Intron          | -             | -                 | C            | T            | 0.32                    | 1.00      |     | 0.82               | 0.34                    | 1.00      | 0.58                    |                    |
| rs10227616 | PRKAR2B     | 7          | 106,462,434 | Flanking 5' UTR | -             | -                 | C            | A            | 0.32                    | 1.00      |     | 0.22               | 0.34                    | 1.00      | 0.22                    |                    |
| rs1544582  | PRKAR2B     | 7          | 106,475,074 | Intron          | -             | -                 | A            | G            | 0.48                    | 1.00      |     | 0.69               | 0.45                    | 1.00      | 0.42                    |                    |
| rs2237649  | PRKAR2B     | 7          | 106,481,518 | Intron          | -             | -                 | G            | A            | 0.48                    | 1.00      |     | 0.84               | 0.45                    | 1.00      | 0.37                    |                    |
| rs1476879  | PRKAR2B     | 7          | 106,485,977 | Intron          | -             | -                 | T            | A            | 0.48                    | 1.00      |     | 1.00               | 0.46                    | 1.00      | 0.32                    |                    |
| rs6957586  | PRKAR2B     | 7          | 106,489,869 | Intron          | -             | -                 | A            | G            | 0.32                    | 1.00      |     | 1.00               | 0.34                    | 1.00      | 0.32                    |                    |
| rs11766415 | PRKAR2B     | 7          | 106,496,001 | Intron          | -             | -                 | A            | G            | 0.42                    | 1.00      |     | 0.18               | 0.42                    | 1.00      | 0.42                    |                    |
| rs3801969  | PRKAR2B     | 7          | 106,498,728 | Intron          | -             | -                 | G            | T            | 0.45                    | 1.00      |     | 0.36               | 0.44                    | 1.00      | 0.27                    |                    |
| rs2536503  | PRKAR2B     | 7          | 106,501,051 | Intron          | -             | -                 | G            | A            | 0.13                    | 1.00      |     | 1.00               | 0.12                    | 1.00      | 0.81                    |                    |
| rs2536504  | PRKAR2B     | 7          | 106,501,141 | Intron          | -             | -                 | C            | T            | 0.34                    | 1.00      |     | 0.22               | 0.34                    | 1.00      | 0.38                    |                    |
| rs6960842  | PRKAR2B     | 7          | 106,502,556 | Intron          | -             | -                 | C            | G            | 0.42                    | 1.00      |     | 0.47               | 0.43                    | 1.00      | 0.31                    |                    |
| rs17340577 | PRKAR2B     | 7          | 106,506,649 | Intron          | -             | -                 | C            | T            | 0.07                    | 0.99      |     | 0.71               | 0.09                    | 0.99      | 0.53                    |                    |
| rs2299419  | PRKAR2B     | 7          | 106,506,772 | Intron          | -             | -                 | T            | C            | 0.09                    | 1.00      |     | 1.00               | 0.09                    | 1.00      | 0.76                    |                    |
| rs22       |             |            |             |                 |               |                   |              |              |                         |           |     |                    |                         |           |                         |                    |

| SNP        | Gene Region   | Chromosome | Position    | Location        | Coding Status | Amino Acid Change | Major Allele | Minor Allele | Male |           |     |            | Female  |      |                         |     |
|------------|---------------|------------|-------------|-----------------|---------------|-------------------|--------------|--------------|------|-----------|-----|------------|---------|------|-------------------------|-----|
|            |               |            |             |                 |               |                   |              |              | MAF  | Call Rate | HWE | Chi-square | Exact P | MAF  | Call Rate               | HWE |
| rs3793336  | CDK5          | 7          | 150,393,804 | Intron          | -             | -                 | A            | G            | 0.14 | 0.78      |     | 0.48       | 0.14    | 0.79 | 0.17                    |     |
| rs2303933  | CDK5          | 7          | 150,397,732 | Intron          | -             | -                 | G            | A            | 0.40 | 1.00      |     | 0.67       | 0.41    | 1.00 | 0.54                    |     |
| rs2303937  | CDK5          | 7          | 150,399,719 | Coding Region   | Synonymous    | T734T (NP_003031) | G            | A            | 0.45 | 1.00      |     | 0.36       | 0.44    | 1.00 | 0.48                    |     |
| rs11765015 | CDK5          | 7          | 150,401,765 | Intron          | -             | -                 | G            | A            | 0.28 | 0.99      |     | 0.71       | 0.26    | 1.00 | 0.61                    |     |
| rs4733065  | CHRNA2        | 8          | 27,363,921  | Intron          | -             | -                 | G            | A            | 0.46 | 0.98      |     | 0.36       | 0.46    | 0.99 | 0.55                    |     |
| rs2278319  | CHRNA2        | 8          | 27,364,878  | Intron          | -             | -                 | C            | T            | 0.24 | 1.00      |     | 0.68       | 0.25    | 1.00 | 0.24                    |     |
| rs1106359  | CHRNA2        | 8          | 27,365,256  | Intron          | -             | -                 | T            | C            | 0.42 | 1.00      |     | 0.92       | 0.40    | 1.00 | 0.08                    |     |
| rs1879184  | CHRNA2        | 8          | 27,367,620  | Coding Region   | Synonymous    | T876T (NP_775268) | C            | T            | 0.13 | 1.00      |     | 0.65       | 0.14    | 1.00 | 0.41                    |     |
| rs10093964 | CHRNA2        | 8          | 27,367,957  | Intron          | -             | -                 | C            | T            | 0.43 | 0.99      |     | 0.92       | 0.41    | 1.00 | 0.08                    |     |
| rs1879182  | CHRNA2        | 8          | 27,371,793  | Coding Region   | Synonymous    | A960A (NP_775268) | G            | A            | 0.13 | 1.00      |     | 0.65       | 0.14    | 1.00 | 0.41                    |     |
| rs748283   | CHRNA2        | 8          | 27,373,112  | Flanking 3' UTR | -             | -                 | C            | A            | 0.49 | 1.00      |     | 0.42       | 0.49    | 1.00 | 0.20                    |     |
| rs1057137  | CHRNA2        | 8          | 27,373,362  | Flanking 3' UTR | -             | -                 | G            | T            | 0.40 | 0.98      |     | 0.67       | 0.39    | 1.00 | 0.11                    |     |
| rs735421   | CHRNA2        | 8          | 27,375,209  | Intron          | -             | -                 | A            | G            | 0.29 | 0.99      |     | 0.54       | 0.31    | 1.00 | 0.73                    |     |
| rs891394   | CHRNA2        | 8          | 27,375,686  | Intron          | -             | -                 | C            | G            | 0.25 | 1.00      |     | 1.00       | 0.27    | 1.00 | 0.06                    |     |
| rs3735757  | CHRNA2        | 8          | 27,377,514  | Intron          | -             | -                 | C            | G            | 0.17 | 1.00      |     | 1.00       | 0.14    | 0.99 | 0.67                    |     |
| rs2322581  | CHRNA2        | 8          | 27,379,524  | Intron          | -             | -                 | T            | G            | 0.17 | 1.00      |     | 0.72       | 0.15    | 1.00 | 0.57                    |     |
| rs891398   | CHRNA2        | 8          | 27,380,739  | Coding Region   | Nonsynonymous | T125A (NP_000733) | T            | C            | 0.47 | 1.00      |     | 0.55       | 0.48    | 1.00 | 0.76                    |     |
| rs891399   | CHRNA2        | 8          | 27,381,340  | Intron          | -             | -                 | G            | A            | 0.13 | 1.00      |     | 0.65       | 0.13    | 1.00 | 0.83                    |     |
| rs2565062  | CHRNA2        | 8          | 27,381,857  | Intron          | -             | -                 | A            | G            | 0.13 | 1.00      |     | 0.65       | 0.13    | 1.00 | 1.00                    |     |
| rs2472554  | CHRNA2        | 8          | 27,384,271  | Intron          | -             | -                 | C            | G            | 0.30 | 1.00      |     | 0.92       | 0.31    | 1.00 | 0.82                    |     |
| rs2472553  | CHRNA2        | 8          | 27,384,428  | Coding Region   | Nonsynonymous | T22I (NP_000733)  | G            | A            | 0.13 | 1.00      |     | 0.65       | 0.13    | 1.00 | 1.00                    |     |
| rs7815010  | CHRNA2        | 8          | 27,386,013  | Intron          | -             | -                 | C            | T            | 0.25 | 1.00      |     | 0.89       | 0.25    | 1.00 | 0.69                    |     |
| rs2741339  | CHRNA2        | 8          | 27,390,886  | Intron          | -             | -                 | A            | G            | 0.28 | 1.00      |     | 0.61       | 0.26    | 1.00 | 1.00                    |     |
| rs2565059  | CHRNA2        | 8          | 27,392,895  | Flanking 5' UTR | -             | -                 | G            | A            | 0.18 | 1.00      |     | 1.00       | 0.19    | 1.00 | 0.74                    |     |
| rs2565055  | CHRNA2        | 8          | 27,393,297  | Flanking 5' UTR | -             | -                 | G            | T            | 0.24 | 1.00      |     | 1.00       | 0.24    | 1.00 | 0.59                    |     |
| rs2741335  | CHRNA2        | 8          | 27,393,708  | Flanking 5' UTR | -             | -                 | A            | C            | 0.26 | 1.00      |     | 0.90       | 0.27    | 1.00 | 1.00                    |     |
| rs6558000  | CHRNA2        | 8          | 27,395,271  | Flanking 5' UTR | -             | -                 | T            | C            | 0.08 | 1.00      |     | 0.72       | 0.07    | 1.00 | 0.25                    |     |
| rs7017417  | CHRNA2        | 8          | 27,401,222  | Flanking 5' UTR | -             | -                 | A            | G            | 0.10 | 1.00      |     | 0.26       | 0.10    | 1.00 | 1.00                    |     |
| rs9314348  | CHRNA2        | 8          | 27,401,343  | Flanking 5' UTR | -             | -                 | T            | C            | 0.10 | 1.00      |     | 0.27       | 0.10    | 1.00 | 1.00                    |     |
| rs7036694  | CHRNA2        | 8          | 27,403,111  | Flanking 5' UTR | -             | -                 | C            | G            | 0.09 | 1.00      |     | 0.54       | 0.09    | 1.00 | 1.00                    |     |
| rs7017612  | CHRNA6/CHRNA3 | 8          | 42,718,402  | Flanking 3' UTR | -             | -                 | A            | C            | 0.21 | 0.99      |     | 0.54       | 0.18    | 1.00 | 0.18                    |     |
| rs9298628  | CHRNA6        | 8          | 42,725,148  | Flanking 3' UTR | -             | -                 | C            | T            | 0.20 | 0.99      |     | 0.75       | 0.19    | 1.00 | 0.63                    |     |
| rs2304297  | CHRNA6        | 8          | 42,727,356  | 3' UTR          | -             | -                 | G            | C            | 0.24 | 1.00      |     | 0.78       | 0.22    | 1.00 | 0.89                    |     |
| rs2196128  | CHRNA6        | 8          | 42,737,443  | Intron          | -             | -                 | T            | C            | 0.22 | 1.00      |     | 0.89       | 0.21    | 1.00 | 1.00                    |     |
| rs16891620 | CHRNA6        | 8          | 42,744,820  | Flanking 5' UTR | -             | -                 | C            | A            | 0.11 | 1.00      |     | 0.79       | 0.12    | 1.00 | 0.63                    |     |
| rs10107450 | CHRNA6        | 8          | 42,749,052  | Flanking 5' UTR | -             | -                 | C            | T            | 0.23 | 1.00      |     | 1.00       | 0.22    | 1.00 | 0.88                    |     |
| rs6474419  | CHRNA6        | 8          | 42,754,456  | Flanking 5' UTR | -             | -                 | A            | G            | 0.04 | 1.00      |     | 1.00       | 0.03    | 1.00 | 1.00                    |     |
| rs1098625  | FREQ          | 9          | 131,967,389 | Flanking 5' UTR | -             | -                 | G            | A            | 0.06 | 1.00      |     | 0.39       | 0.07    | 1.00 | 0.15                    |     |
| rs12378342 | FREQ          | 9          | 131,970,164 | Flanking 5' UTR | -             | -                 | T            | C            | 0.08 | 1.00      |     | 0.15       | 0.07    | 1.00 | 1.00                    |     |
| rs9802616  | FREQ          | 9          | 131,970,944 | Flanking 5' UTR | -             | -                 | T            | A            | 0.16 | 1.00      |     | 0.58       | 0.16    | 1.00 | 0.37                    |     |
| rs917690   | FREQ          | 9          | 131,974,002 | Flanking 5' UTR | -             | -                 | G            | T            | 0.10 | 0.96      |     | 0.38       | 0.10    | 0.96 | 1.00                    |     |
| rs3780708  | FREQ          | 9          | 131,975,772 | Intron          | -             | -                 | C            | T            | 0.34 | 0.98      |     | 1.00       | 0.35    | 0.99 | 0.91                    |     |
| rs1011712  | FREQ          | 9          | 131,976,625 | Intron          | -             | -                 | T            | C            | 0.17 | 1.00      |     | 1.00       | 0.18    | 1.00 | 0.14                    |     |
| rs4837479  | FREQ          | 9          | 131,979,828 | Intron          | -             | -                 | C            | T            | 0.16 | 1.00      |     | 1.00       | 0.16    | 1.00 | 0.14                    |     |
| rs3780711  | FREQ          | 9          | 131,982,864 | Intron          | -             | -                 | T            | C            | 0.12 | 0.97      |     | 0.64       | 0.13    | 0.97 | 5.92 × 10 <sup>-4</sup> |     |
| rs7849345  | FREQ          | 9          | 131,984,366 | Intron          | -             | -                 | C            | T            | 0.48 | 1.00      |     | 0.69       | 0.50    | 0.99 | 0.27                    |     |
| rs10819610 | FREQ          | 9          | 131,986,436 | Intron          | -             | -                 | G            | T            | 0.27 | 1.00      |     | 0.07       | 0.29    | 1.00 | 0.90                    |     |
| rs3824544  | FREQ          | 9          | 131,988,371 | Intron          | -             | -                 | C            | T            | 0.25 | 0.98      |     | 0.59       | 0.23    | 1.00 | 0.16                    |     |
| rs7862394  | FREQ          | 9          | 131,989,685 | Intron          | -             | -                 | A            | G            | 0.32 | 1.00      |     | 0.29       | 0.31    | 1.00 | 0.64                    |     |
| rs10819611 | FREQ          | 9          | 131,995,274 | Intron          | -             | -                 | T            | C            | 0.32 | 1.00      |     | 0.30       | 0.31    | 1.00 | 0.24                    |     |
| rs1009502  | FREQ          | 9          | 131,996,050 | Intron          | -             | -                 | G            | A            | 0.32 | 0.98      |     | 0.13       | 0.32    | 0.96 | 0.56                    |     |
| rs1342043  | FREQ          | 9          | 131,998,126 | Intron          | -             | -                 | T            | C            | 0.14 | 0.99      |     | 0.09       | 0.15    | 1.00 | 0.25                    |     |
| rs7865531  | FREQ          | 9          | 132,000,447 | Intron          | -             | -                 | G            | T            | 0.47 | 1.00      |     | 0.76       | 0.48    | 1.00 | 0.69                    |     |
| rs7032993  | FREQ          | 9          | 132,002,538 | Intron          | -             | -                 | G            | A            | 0.13 | 0.99      |     | 0.12       | 0.15    | 0.99 | 0.85                    |     |
| rs7045735  | FREQ          | 9          | 132,004,454 | Intron          | -             | -                 | A            | G            | 0.39 | 0.95      |     | 0.39       | 0.42    | 0.97 | 0.41                    |     |
| rs7024495  | FREQ          | 9          | 132,007,017 | Intron          | -             | -                 | G            | A            | 0.48 | 1.00      |     | 0.62       | 0.50    | 1.00 | 0.84                    |     |
| rs7023210  | FREQ          | 9          | 132,011,977 | Intron          | -             | -                 | T            | C            | 0.48 | 1.00      |     | 0.69       | 0.49    | 1.00 | 0.92                    |     |
| rs947513   | FREQ          | 9          | 132,013,809 | Intron          | -             | -                 | A            | G            | 0.45 | 1.00      |     | 0.76       | 0.45    | 1.00 | 0.92                    |     |
| rs10819615 | FREQ          | 9          | 132,014,745 | Intron          | -             | -                 | C            | T            | 0.37 | 0.99      |     | 0.39       | 0.34    | 0.99 | 0.82                    |     |
| rs3897499  | FREQ          | 9          | 132,014,885 | Intron          | -             | -                 | A            | T            | 0.36 | 0.99      |     | 0.58       | 0.34    | 0.99 | 0.09                    |     |
| rs4240446  | FREQ          | 9          | 132,018,220 | Intron          | -             | -                 | G            | A            | 0.14 | 0.96      |     | 0.08       | 0.15    | 0.95 | 0.16                    |     |
| rs1098645  | FREQ          | 9          | 132,019,357 | Intron          | -             | -                 | G            | A            | 0.30 | 1.00      |     | 0.09       | 0.28    | 1.00 | 0.62                    |     |
| rs3829905  | FREQ          | 9          | 132,024,932 | Intron          | -             | -                 | C            | T            | 0.36 | 0.85      |     | 0.55       | 0.35    | 0.88 | 0.24                    |     |
| rs2272700  | FREQ          | 9          | 132,028,530 | Coding Region   | Synonymous    | G172G (NP_055101) | G            | A            | 0.33 | 1.00      |     | 0.17       | 0.31    | 1.00 | 0.49                    |     |
| rs2900286  | FREQ          | 9          | 132,030,234 | Intron          | -             | -                 | G            | C            | 0.33 | 1.00      |     | 0.25       | 0.31    | 1.00 | 0.49                    |     |
| rs7873936  | FREQ          | 9          | 132,032,983 | Intron          | -             | -                 | A            | G            | 0.19 | 1.00      |     | 0.42       | 0.17    | 1.00 | 0.72                    |     |
| rs7882859  | FREQ          | 9          | 132,034,981 | Intron          | -             | -                 | A            | G            | 0.12 | 1.00      |     | 0.10       | 0.12    | 1.00 | 0.63                    |     |
| rs1054879  | FREQ          | 9          | 132,035,589 | 3' UTR          | -             | -                 | A            | G            | 0.45 | 1.00      |     | 0.31       | 0.48    | 1.00 | 0.55                    |     |
| rs13710    | FREQ          | 9          | 132,037,596 | 3' UTR          | -             | -                 | T            | C            | 0.33 | 1.00      |     | 0.73       | 0.29    | 1.00 | 0.72                    |     |
| rs709611   | FREQ          | 9          | 132,038,180 | 3' UTR          | -             | -                 | T            | C            | 0.31 | 0.99      |     | 0.81       | 0.28    | 1.00 | 0.32                    |     |
| rs7867364  | FREQ          | 9          | 132,040,103 | Flanking 3' UTR | -             | -                 | C            | T            | 0.18 | 1.00      |     | 0.49       | 0.17    | 1.00 | 0.48                    |     |
| rs7863731  | FREQ          | 9          | 132,042,626 | Flanking 3' UTR | -             | -                 | C            | T            | 0.37 | 0.99      |     | 0.83       | 0.38    | 0.98 | 0.52                    |     |
| rs1557123  | FREQ          | 9          | 132,042,979 | Flanking 3' UTR | -             | -                 | C            | G            | 0.08 | 1.00      |     | 0.08       | 0.08    | 1.00 | 0.17                    |     |
| rs7867693  | FREQ          | 9          | 132,043,625 | Flanking 3' UTR | -             | -                 | G            | A            | 0.13 | 1.00      |     | 0.65       | 0.12    | 1.00 | 0.49                    |     |
| rs7868148  | FREQ          | 9          | 132,043,755 | Flanking 3' UTR | -             | -                 | G            | A            | 0.27 | 1.00      |     | 0.20       | 0.27    | 1.00 | 1.00                    |     |
| rs10819621 | FREQ          | 9          | 132,045,353 | Flanking 3' UTR | -             | -                 | T            | C            | 0.15 | 1.00      |     | 0.44       | 0.15    | 1.00 | 0.85                    |     |
| rs10988653 | FREQ          | 9          | 132,046,295 | Flanking 3' UTR | -             | -                 | T            | C            | 0.39 | 1.00      |     | 0.20       | 0.38    | 1.00 | 0.67                    |     |
| rs2519765  | DBH           | 9          | 135,484,246 | Flanking 5' UTR | -             | -                 | C            | T            | 0.30 | 0.99      |     | 0.63       | 0.35    | 1.00 | 0.38                    |     |
| rs2519148  | DBH           | 9          | 135,484,387 | Flanking 5' UTR | -             | -                 | G            | A            | 0.50 | 0.99      |     | 0.84       | 0.47    | 0.99 | 0.27                    |     |
| rs2519147  | DBH           | 9          | 135,485,139 | Flanking 5' UTR | -             | -                 | A            | G            | 0.34 | 1.00      |     |            |         |      |                         |     |

| SNP        | Gene Region | Chromosome | Position    | Location        | Coding Status | Amino Acid Change | Major Allele | Minor Allele | Male                    |           |      |            | Female                  |      |                         |     |
|------------|-------------|------------|-------------|-----------------|---------------|-------------------|--------------|--------------|-------------------------|-----------|------|------------|-------------------------|------|-------------------------|-----|
|            |             |            |             |                 |               |                   |              |              | MAF                     | Call Rate | HWE  | Chi-square | Exact P                 | MAF  | Call Rate               | HWE |
| rs1101694  | CALY        | 10         | 134,996,704 | Intron          | -             | -                 | T            | C            | 0.13                    | 0.91      | 1.00 |            | 0.12                    | 0.94 | 1.00                    |     |
| rs10776672 | CALY        | 10         | 135,007,945 | Flanking 5' UTR | -             | -                 | A            | C            | 0.11                    | 1.00      | 0.79 |            | 0.10                    | 1.00 | 0.42                    |     |
| rs4838721  | CALY        | 10         | 135,010,940 | Intron          | -             | -                 | T            | C            | 0.19                    | 1.00      | 0.74 |            | 0.17                    | 1.00 | 0.86                    |     |
| rs7932167  | DRD4        | 11         | 610,599     | Intron          | -             | -                 | T            | G            | 0.23                    | 1.00      | 0.77 |            | 0.21                    | 1.00 | 0.30                    |     |
| rs12280580 | DRD4        | 11         | 616,220     | Flanking 3' UTR | -             | -                 | C            | G            | 0.30                    | 1.00      | 0.07 |            | 0.28                    | 1.00 | 0.81                    |     |
| rs4987059  | DRD4        | 11         | 626,433     | Flanking 5' UTR | -             | -                 | A            | C            | 0.06                    | 1.00      | 1.00 |            | 0.05                    | 1.00 | 0.62                    |     |
| rs956461   | DRD4        | 11         | 626,496     | Flanking 5' UTR | -             | -                 | G            | A            | 0.36                    | 0.96      | 0.26 |            | 0.36                    | 0.96 | 0.03                    |     |
| rs1800443  | DRD4        | 11         | 629,830     | Coding Region   | Nonsynonymous | V194G (NP_000788) | T            | NA           | 0.00                    | 1.00      | NA   |            | 0.00                    | 1.00 | NA                      |     |
| rs11246226 | DRD4        | 11         | 631,191     | Flanking 3' UTR | -             | -                 | A            | C            | 0.50                    | 0.90      | 0.92 |            | 0.48                    | 0.93 | 0.68                    |     |
| rs936465   | DRD4        | 11         | 633,568     | Flanking 3' UTR | -             | -                 | C            | G            | 0.47                    | 0.88      | 0.83 |            | 0.45                    | 0.92 | 0.46                    |     |
| rs10902188 | DRD4        | 11         | 644,043     | Coding Region   | -             | -                 | G            | A            | 0.09                    | 1.00      | 0.76 |            | 0.09                    | 1.00 | 0.34                    |     |
| rs6598007  | DRD4        | 11         | 646,523     | Intron          | -             | -                 | C            | T            | 0.06                    | 1.00      | 0.38 |            | 0.06                    | 1.00 | 0.38                    |     |
| rs4963126  | DRD4        | 11         | 646,845     | Intron          | -             | -                 | G            | A            | 0.45                    | 1.00      | 0.22 |            | 0.49                    | 1.00 | 0.23                    |     |
| rs11603404 | DRD4        | 11         | 646,940     | Intron          | -             | -                 | G            | A            | 0.13                    | 1.00      | 1.00 |            | 0.14                    | 1.00 | 0.15                    |     |
| rs1004446  | TH          | 11         | 2,126,719   | Flanking 3' UTR | -             | -                 | G            | A            | 0.37                    | 1.00      | 0.59 |            | 0.38                    | 1.00 | 0.21                    |     |
| rs7924316  | TH          | 11         | 2,130,023   | Flanking 3' UTR | -             | -                 | G            | T            | 0.49                    | 0.99      | 0.16 |            | 0.48                    | 1.00 | 0.69                    |     |
| rs3842748  | TH          | 11         | 2,137,971   | Intron          | -             | -                 | G            | C            | 0.22                    | 0.97      | 0.76 |            | 0.24                    | 0.98 | 0.41                    |     |
| rs2070762  | TH          | 11         | 2,142,911   | Intron          | -             | -                 | G            | A            | 0.50                    | 0.99      | 0.92 |            | 0.50                    | 1.00 | 0.49                    |     |
| rs6356     | TH          | 11         | 2,147,527   | Coding Region   | Nonsynonymous | V108M (NP_954987) | C            | T            | 0.37                    | 1.00      | 1.00 |            | 0.35                    | 1.00 | 0.74                    |     |
| rs10770140 | TH          | 11         | 2,150,173   | Flanking 5' UTR | -             | -                 | T            | C            | 0.35                    | 0.99      | 0.91 |            | 0.41                    | 0.99 | 0.84                    |     |
| rs10770141 | TH          | 11         | 2,150,416   | Flanking 5' UTR | -             | -                 | G            | A            | 0.35                    | 1.00      | 0.51 |            | 0.41                    | 1.00 | 0.84                    |     |
| rs10743149 | TH          | 11         | 2,150,751   | Flanking 5' UTR | -             | -                 | C            | T            | 0.12                    | 1.00      | 0.64 |            | 0.13                    | 1.00 | 0.65                    |     |
| rs10840495 | TH          | 11         | 2,152,413   | Flanking 5' UTR | -             | -                 | G            | A            | 0.34                    | 0.86      | 0.34 |            | 0.38                    | 0.88 | 0.91                    |     |
| rs11042978 | TH          | 11         | 2,154,994   | Flanking 5' UTR | -             | -                 | G            | T            | 0.48                    | 0.99      | 0.36 |            | 0.46                    | 1.00 | 0.69                    |     |
| rs6578993  | TH          | 11         | 2,157,739   | Flanking 5' UTR | -             | -                 | C            | T            | 0.16                    | 1.00      | 0.35 |            | 0.15                    | 1.00 | 0.03                    |     |
| rs11043001 | TH          | 11         | 2,159,621   | Flanking 5' UTR | -             | -                 | G            | A            | 0.17                    | 1.00      | 0.59 |            | 0.16                    | 1.00 | 8.89 × 10 <sup>-7</sup> |     |
| rs11043003 | TH          | 11         | 2,159,730   | Flanking 5' UTR | -             | -                 | T            | C            | 0.23                    | 1.00      | 0.20 |            | 0.27                    | 1.00 | 0.32                    |     |
| rs11043016 | TH          | 11         | 2,162,603   | Flanking 5' UTR | -             | -                 | T            | C            | 0.24                    | 1.00      | 0.27 |            | 0.27                    | 0.99 | 0.26                    |     |
| rs11564703 | TH          | 11         | 2,163,785   | Flanking 5' UTR | -             | -                 | A            | G            | 0.41                    | 0.99      | 0.21 |            | 0.44                    | 0.99 | 0.48                    |     |
| rs12419948 | BDNF        | 11         | 27,623,560  | Flanking 3' UTR | -             | -                 | T            | A            | 0.21                    | 1.00      | 0.36 |            | 0.19                    | 1.00 | 0.52                    |     |
| rs1519479  | BDNF        | 11         | 27,624,107  | Flanking 3' UTR | -             | -                 | T            | C            | 0.48                    | 1.00      | 0.22 |            | 0.47                    | 1.00 | 0.32                    |     |
| rs11030098 | BDNF        | 11         | 27,628,869  | Flanking 3' UTR | -             | -                 | C            | G            | 1.27 × 10 <sup>-3</sup> | 1.00      | 1.00 |            | 3.71 × 10 <sup>-3</sup> | 1.00 | 1.00                    |     |
| rs1519480  | BDNF        | 11         | 27,632,288  | Flanking 3' UTR | -             | -                 | T            | C            | 0.31                    | 1.00      | 0.82 |            | 0.27                    | 1.00 | 0.80                    |     |
| rs7124442  | BDNF        | 11         | 27,633,617  | 3' UTR          | -             | -                 | T            | C            | 0.30                    | 0.97      | 1.00 |            | 0.26                    | 0.98 | 0.70                    |     |
| rs6265     | BDNF        | 11         | 27,636,492  | Coding Region   | Nonsynonymous | M66V (NP_733931)  | C            | T            | 0.19                    | 1.00      | 0.52 |            | 0.18                    | 1.00 | 0.73                    |     |
| rs1103011  | BDNF        | 11         | 27,637,320  | Flanking 5' UTR | -             | -                 | A            | T            | 0.46                    | 1.00      | 0.16 |            | 0.48                    | 1.00 | 0.76                    |     |
| rs11030104 | BDNF        | 11         | 27,641,093  | Flanking 5' UTR | -             | -                 | A            | T            | 0.21                    | 1.00      | 0.29 |            | 0.20                    | 1.00 | 0.28                    |     |
| rs1401635  | BDNF        | 11         | 27,650,567  | Flanking 5' UTR | -             | -                 | G            | C            | 0.30                    | 1.00      | 1.00 |            | 0.27                    | 1.00 | 0.70                    |     |
| rs12291063 | BDNF        | 11         | 27,650,677  | Flanking 5' UTR | -             | -                 | T            | C            | 1.27 × 10 <sup>-3</sup> | 1.00      | 1.00 |            | 3.71 × 10 <sup>-3</sup> | 1.00 | 1.00                    |     |
| rs2049045  | BDNF        | 11         | 27,650,817  | Flanking 5' UTR | -             | -                 | G            | C            | 0.19                    | 1.00      | 0.62 |            | 0.17                    | 1.00 | 0.72                    |     |
| rs11030107 | BDNF        | 11         | 27,651,411  | Flanking 5' UTR | -             | -                 | A            | G            | 0.26                    | 0.98      | 0.43 |            | 0.22                    | 0.98 | 1.00                    |     |
| rs10835210 | BDNF        | 11         | 27,652,486  | Flanking 5' UTR | -             | -                 | C            | A            | 0.42                    | 1.00      | 0.05 |            | 0.48                    | 1.00 | 1.00                    |     |
| rs7103873  | BDNF        | 11         | 27,656,893  | Flanking 5' UTR | -             | -                 | G            | C            | 0.46                    | 1.00      | 0.22 |            | 0.48                    | 1.00 | 0.69                    |     |
| rs6484220  | BDNF        | 11         | 27,659,764  | Flanking 3' UTR | -             | -                 | A            | T            | 0.22                    | 1.00      | 0.38 |            | 0.20                    | 1.00 | 0.03                    |     |
| rs1013402  | BDNF        | 11         | 27,668,957  | Flanking 3' UTR | -             | -                 | A            | G            | 0.31                    | 1.00      | 0.91 |            | 0.27                    | 1.00 | 0.45                    |     |
| rs988748   | BDNF        | 11         | 27,681,321  | Flanking 5' UTR | -             | -                 | G            | C            | 0.22                    | 1.00      | 0.38 |            | 0.21                    | 1.00 | 0.05                    |     |
| rs10767664 | BDNF        | 11         | 27,682,562  | Flanking 5' UTR | -             | -                 | A            | T            | 0.22                    | 0.99      | 0.37 |            | 0.20                    | 1.00 | 0.03                    |     |
| rs2030324  | BDNF        | 11         | 27,683,491  | Flanking 5' UTR | -             | -                 | G            | A            | 0.48                    | 1.00      | 0.36 |            | 0.47                    | 1.00 | 0.55                    |     |
| rs11030119 | BDNF        | 11         | 27,684,678  | Flanking 5' UTR | -             | -                 | G            | A            | 0.29                    | 1.00      | 0.90 |            | 0.26                    | 1.00 | 0.30                    |     |
| rs7934165  | BDNF        | 11         | 27,688,559  | Flanking 5' UTR | -             | -                 | A            | G            | 0.48                    | 0.99      | 0.48 |            | 0.47                    | 0.99 | 0.69                    |     |
| rs11030121 | BDNF        | 11         | 27,692,783  | Flanking 3' UTR | -             | -                 | C            | T            | 0.30                    | 1.00      | 0.90 |            | 0.27                    | 1.00 | 0.37                    |     |
| rs12273363 | BDNF        | 11         | 27,701,435  | Flanking 5' UTR | -             | -                 | T            | C            | 0.20                    | 0.99      | 0.06 |            | 0.16                    | 0.99 | 0.86                    |     |
| rs908867   | BDNF        | 11         | 27,702,340  | Flanking 5' UTR | -             | -                 | T            | C            | 0.09                    | 1.00      | 0.36 |            | 0.10                    | 1.00 | 1.00                    |     |
| rs1491850  | BDNF        | 11         | 27,706,301  | Flanking 5' UTR | -             | -                 | T            | C            | 0.43                    | 0.99      | 0.05 |            | 0.37                    | 1.00 | 0.24                    |     |
| rs2049048  | BDNF        | 11         | 27,707,162  | Flanking 5' UTR | -             | -                 | G            | A            | 0.16                    | 1.00      | 0.71 |            | 0.13                    | 1.00 | 0.13                    |     |
| rs1124589  | ANKK1       | 11         | 112,750,258 | Flanking 3' UTR | -             | -                 | G            | A            | 0.48                    | 0.95      | 0.54 |            | 0.49                    | 0.95 | 0.08                    |     |
| rs4938010  | ANKK1       | 11         | 112,750,776 | Flanking 3' UTR | -             | -                 | A            | G            | 0.14                    | 1.00      | 0.67 |            | 0.15                    | 1.00 | 0.24                    |     |
| rs754672   | ANKK1       | 11         | 112,754,346 | Flanking 3' UTR | -             | -                 | C            | G            | 0.46                    | 1.00      | 0.42 |            | 0.48                    | 1.00 | 0.84                    |     |
| rs3897584  | ANKK1       | 11         | 112,754,935 | Flanking 3' UTR | -             | -                 | C            | G            | 0.34                    | 1.00      | 0.18 |            | 0.34                    | 1.00 | 0.74                    |     |
| rs10891545 | ANKK1       | 11         | 112,763,275 | Flanking 5' UTR | -             | -                 | T            | C            | 0.13                    | 1.00      | 0.65 |            | 0.15                    | 1.00 | 0.70                    |     |
| rs4938012  | ANKK1       | 11         | 112,764,864 | Intron          | -             | -                 | G            | A            | 0.33                    | 1.00      | 0.09 |            | 0.33                    | 1.00 | 0.82                    |     |
| rs7123797  | ANKK1       | 11         | 112,767,781 | Intron          | -             | -                 | G            | A            | 0.34                    | 1.00      | 0.02 |            | 0.34                    | 1.00 | 0.74                    |     |
| rs12360992 | ANKK1       | 11         | 112,768,110 | Intron          | -             | -                 | C            | A            | 0.46                    | 1.00      | 0.61 |            | 0.48                    | 1.00 | 0.92                    |     |
| rs4590907  | ANKK1       | 11         | 112,768,580 | Intron          | -             | -                 | T            | G            | 0.13                    | 1.00      | 0.65 |            | 0.15                    | 1.00 | 0.84                    |     |
| rs17115439 | ANKK1       | 11         | 112,769,482 | Coding Region   | -             | -                 | C            | T            | 0.33                    | 1.00      | 0.11 |            | 0.33                    | 1.00 | 0.74                    |     |
| rs1124596  | ANKK1       | 11         | 112,769,721 | Intron          | -             | -                 | C            | G            | 0.46                    | 1.00      | 0.38 |            | 0.48                    | 1.00 | 0.03                    |     |
| rs4938015  | ANKK1       | 11         | 112,769,854 | Intron          | -             | -                 | T            | C            | 0.33                    | 1.00      | 0.11 |            | 0.33                    | 1.00 | 0.65                    |     |
| rs7118900  | ANKK1       | 11         | 112,772,031 | Coding Region   | Nonsynonymous | A239T (NP_848605) | G            | A            | 0.20                    | 1.00      | 1.00 |            | 0.19                    | 0.99 | 0.63                    |     |
| rs4938016  | ANKK1       | 11         | 112,775,225 | Coding Region   | Nonsynonymous | G442R (NP_848605) | C            | G            | 0.30                    | 1.00      | 1.00 |            | 0.31                    | 1.00 | 0.91                    |     |
| rs2734849  | ANKK1       | 11         | 112,775,370 | Coding Region   | Nonsynonymous | H490R (NP_848605) | G            | A            | 0.50                    | 1.00      | 0.76 |            | 0.50                    | 1.00 | 0.84                    |     |
| rs2734848  | ANKK1       | 11         | 112,775,584 | Coding Region   | Synonymous    | Y561Y (NP_848605) | T            | C            | 0.16                    | 0.95      | 0.70 |            | 0.16                    | 0.97 | 1.00                    |     |
| rs7104979  | ANKK1       | 11         | 112,775,688 | Coding Region   | Nonsynonymous | P596L (NP_848605) | C            | T            | 1.27 × 10 <sup>-3</sup> | 1.00      | 1.00 |            | 0.00                    | 1.00 | NA                      |     |
| rs1800497  | ANKK1       | 11         | 112,776,038 | Coding Region   | Nonsynonymous | E713K (NP_848605) | A            | G            | 0.21                    | 0.94      | 0.53 |            | 0.20                    | 0.96 | 0.88                    |     |
| rs11214601 | ANKK1       | 11         | 112,777,972 | Flanking 3' UTR | -             | -                 | C            | T            | 0.17                    | 1.00      | 1.00 |            | 0.17                    | 1.00 | 0.60                    |     |
| rs1003641  | ANKK1       | 11         | 112,778,846 | Flanking 3' UTR | -             | -                 | G            | A            | 0.28                    | 1.00      | 0.90 |            | 0.30                    | 1.00 | 1.00                    |     |
| rs12422191 | ANKK1       | 11         | 112,779,220 | Flanking 3' UTR | -             | -                 | G            | A            | 0.08                    | 1.00      | 0.72 |            | 0.09                    | 1.00 | 0.34                    |     |
| rs10891549 | ANKK1       | 11         | 112,783,657 | Flanking 3' UTR | -             | -                 | C            | T            | 0.45                    | 0.99      | 0.68 |            | 0.47                    | 0.99 | 0.92                    |     |
| rs2734841  | ANKK1       | 11         | 112,786,986 | Intron          | -             | -                 | G            | A            | 0.28                    | 0.99      | 1.00 |            | 0.30</                  |      |                         |     |

| SNP        | Gene Region   | Chromosome | Position   | Location        | Coding Status | Amino Acid Change | Major Allele | Minor Allele | Male                    |           |                         |            | Female  |                         |           |                         |
|------------|---------------|------------|------------|-----------------|---------------|-------------------|--------------|--------------|-------------------------|-----------|-------------------------|------------|---------|-------------------------|-----------|-------------------------|
|            |               |            |            |                 |               |                   |              |              | MAF                     | Call Rate | HWE                     | Chi-square | Exact P | MAF                     | Call Rate | HWE                     |
| rs876259   | CALM1         | 14         | 89,952,709 | Flanking 3' UTR | -             | -                 | T            | G            | 0.07                    | 1.00      |                         | 0.04       |         | 0.06                    | 1.00      | 0.67                    |
| rs12895068 | CALM1         | 14         | 89,957,031 | Flanking 3' UTR | -             | -                 | A            | T            | 0.07                    | 1.00      |                         | 0.01       |         | 0.06                    | 1.00      | 0.66                    |
| rs1514246  | CHRNA7        | 15         | 30,106,782 | Flanking 5' UTR | -             | -                 | C            | A            | 0.26                    | 0.99      |                         | 0.18       |         | 0.26                    | 0.99      | 1.00                    |
| rs868437   | CHRNA7        | 15         | 30,111,569 | Intron          | -             | -                 | T            | C            | 0.28                    | 1.00      |                         | 0.45       |         | 0.27                    | 1.00      | 0.80                    |
| rs883473   | CHRNA7        | 15         | 30,112,968 | Intron          | -             | -                 | G            | A            | 0.29                    | 0.99      |                         | 0.47       |         | 0.29                    | 1.00      | 0.81                    |
| rs4779563  | CHRNA7        | 15         | 30,124,529 | Intron          | -             | -                 | C            | T            | 0.24                    | 0.99      |                         | 0.58       |         | 0.23                    | 1.00      | 0.67                    |
| rs1913456  | CHRNA7        | 15         | 30,133,241 | Intron          | -             | -                 | A            | T            | 0.19                    | 1.00      |                         | 0.51       |         | 0.18                    | 1.00      | 0.74                    |
| rs4779969  | CHRNA7        | 15         | 30,136,223 | Intron          | -             | -                 | C            | A            | 0.05                    | 0.99      |                         | 0.22       |         | 0.05                    | 1.00      | 0.60                    |
| rs8027814  | CHRNA7        | 15         | 30,137,964 | Intron          | -             | -                 | A            | G            | 0.28                    | 0.99      |                         | 0.31       |         | 0.27                    | 0.99      | 0.90                    |
| rs2175886  | CHRNA7        | 15         | 30,143,239 | Intron          | -             | -                 | T            | C            | 0.44                    | 0.99      |                         | 0.18       |         | 0.45                    | 0.99      | 0.13                    |
| rs11071530 | CHRNA7        | 15         | 30,147,264 | Intron          | -             | -                 | G            | A            | 0.09                    | 0.99      |                         | 0.22       |         | 0.09                    | 1.00      | 0.35                    |
| rs6494211  | CHRNA7        | 15         | 30,164,880 | Intron          | -             | -                 | A            | T            | 0.32                    | 0.99      |                         | 0.08       |         | 0.33                    | 0.99      | 0.37                    |
| rs1514248  | CHRNA7        | 15         | 30,164,975 | Intron          | -             | -                 | T            | C            | 0.11                    | 0.93      | 3.08 × 10 <sup>-5</sup> | 0.11       | 0.93    | 0.11                    | 0.93      | 4.05 × 10 <sup>-4</sup> |
| rs8033518  | CHRNA7        | 15         | 30,168,901 | Intron          | -             | -                 | G            | A            | 0.05                    | 1.00      |                         | 0.22       |         | 0.05                    | 1.00      | 0.58                    |
| rs2133965  | CHRNA7        | 15         | 30,171,846 | Intron          | -             | -                 | G            | A            | 0.06                    | 0.99      |                         | 0.66       |         | 0.06                    | 1.00      | 0.19                    |
| rs7175581  | CHRNA7        | 15         | 30,172,759 | Intron          | -             | -                 | G            | A            | 0.42                    | 0.99      |                         | 0.26       |         | 0.41                    | 1.00      | 0.84                    |
| rs4779565  | CHRNA7        | 15         | 30,177,362 | Intron          | -             | -                 | G            | T            | 0.42                    | 0.99      |                         | 0.35       |         | 0.43                    | 1.00      | 1.00                    |
| rs8035668  | CHRNA7        | 15         | 30,178,638 | Intron          | -             | -                 | A            | G            | 0.22                    | 1.00      |                         | 1.00       |         | 0.19                    | 1.00      | 0.63                    |
| rs9788657  | CHRNA7        | 15         | 30,182,318 | Intron          | -             | -                 | C            | A            | 0.21                    | 0.99      |                         | 1.00       |         | 0.19                    | 0.99      | 0.60                    |
| rs6494223  | CHRNA7        | 15         | 30,183,749 | Intron          | -             | -                 | C            | T            | 0.37                    | 1.00      |                         | 0.28       |         | 0.39                    | 1.00      | 0.47                    |
| rs8030215  | CHRNA7        | 15         | 30,184,411 | Intron          | -             | -                 | C            | T            | 0.21                    | 0.99      |                         | 0.88       |         | 0.19                    | 0.99      | 0.74                    |
| rs9788679  | CHRNA7        | 15         | 30,186,609 | Intron          | -             | -                 | C            | A            | 0.20                    | 0.99      |                         | 1.00       |         | 0.18                    | 0.99      | 0.40                    |
| rs10438342 | CHRNA7        | 15         | 30,189,338 | Intron          | -             | -                 | G            | A            | 0.38                    | 0.99      |                         | 0.91       |         | 0.37                    | 0.99      | 0.52                    |
| rs11852956 | CHRNA7        | 15         | 30,190,622 | Intron          | -             | -                 | T            | C            | 0.22                    | 1.00      |                         | 0.56       |         | 0.23                    | 1.00      | 0.25                    |
| rs1039394  | CHRNA7        | 15         | 30,195,021 | Intron          | -             | -                 | C            | G            | 0.06                    | 0.99      |                         | 0.20       |         | 0.05                    | 0.99      | 0.29                    |
| rs16956223 | CHRNA7        | 15         | 30,198,075 | Intron          | -             | -                 | G            | A            | 0.17                    | 1.00      |                         | 1.00       |         | 0.16                    | 1.00      | 0.70                    |
| rs1392808  | CHRNA7        | 15         | 30,198,807 | Intron          | -             | -                 | C            | A            | 0.17                    | 0.99      |                         | 1.00       |         | 0.15                    | 0.99      | 0.56                    |
| rs904952   | CHRNA7        | 15         | 30,206,037 | Intron          | -             | -                 | T            | C            | 0.49                    | 0.99      |                         | 0.31       |         | 0.48                    | 0.99      | 0.55                    |
| rs7402321  | CHRNA7        | 15         | 30,207,700 | Intron          | -             | -                 | C            | T            | 0.37                    | 0.96      |                         | 0.38       |         | 0.38                    | 0.97      | 0.39                    |
| rs7175359  | CHRNA7        | 15         | 30,212,239 | Intron          | -             | -                 | C            | T            | 0.49                    | 0.99      |                         | 0.27       |         | 0.47                    | 1.00      | 0.69                    |
| rs2651418  | CHRNA7        | 15         | 30,226,573 | Intron          | -             | -                 | T            | C            | 0.49                    | 0.98      |                         | 0.13       |         | 0.49                    | 0.99      | 0.84                    |
| rs2611605  | CHRNA7        | 15         | 30,228,925 | Intron          | -             | -                 | C            | T            | 0.18                    | 0.99      |                         | 0.87       |         | 0.20                    | 1.00      | 0.88                    |
| rs7178176  | CHRNA7        | 15         | 30,231,105 | Intron          | -             | -                 | C            | T            | 0.25                    | 1.00      |                         | 1.00       |         | 0.25                    | 1.00      | 0.42                    |
| rs2337980  | CHRNA7        | 15         | 30,231,488 | Intron          | -             | -                 | C            | T            | 0.45                    | 0.99      |                         | 0.42       |         | 0.43                    | 1.00      | 0.68                    |
| rs7164518  | CHRNA7        | 15         | 30,249,900 | Flanking 3' UTR | -             | -                 | A            | G            | 0.18                    | 0.99      |                         | 1.00       |         | 0.17                    | 0.99      | 0.72                    |
| rs4275821  | CHRNA5        | 15         | 76,636,596 | Flanking 3' UTR | -             | -                 | T            | C            | 0.35                    | 1.00      |                         | 0.22       |         | 0.38                    | 1.00      | 1.00                    |
| rs2036527  | CHRNA5        | 15         | 76,638,670 | Flanking 5' UTR | -             | -                 | G            | A            | 0.41                    | 1.00      |                         | 0.68       |         | 0.40                    | 1.00      | 0.30                    |
| rs684513   | CHRNA5        | 15         | 76,645,455 | Intron          | -             | -                 | C            | G            | 0.17                    | 0.99      |                         | 0.60       |         | 0.15                    | 1.00      | 0.69                    |
| rs871058   | CHRNA5        | 15         | 76,645,546 | Intron          | -             | -                 | G            | A            | 0.33                    | 1.00      |                         | 0.09       |         | 0.37                    | 1.00      | 0.75                    |
| rs667282   | CHRNA5        | 15         | 76,650,527 | Intron          | -             | -                 | T            | C            | 0.20                    | 1.00      |                         | 0.22       |         | 0.16                    | 1.00      | 0.58                    |
| rs601079   | CHRNA5        | 15         | 76,656,634 | Intron          | -             | -                 | A            | T            | 0.39                    | 1.00      |                         | 1.00       |         | 0.44                    | 1.00      | 1.00                    |
| rs637137   | CHRNA5        | 15         | 76,661,031 | Intron          | -             | -                 | T            | A            | 0.20                    | 1.00      |                         | 0.27       |         | 0.16                    | 1.00      | 0.58                    |
| rs692780   | CHRNA5        | 15         | 76,663,560 | Intron          | -             | -                 | G            | T            | 0.35                    | 1.00      |                         | 0.37       |         | 0.38                    | 1.00      | 0.60                    |
| rs555018   | CHRNA3;CHRNA5 | 15         | 76,666,297 | Intron          | -             | -                 | A            | G            | 0.39                    | 1.00      |                         | 1.00       |         | 0.44                    | 1.00      | 0.92                    |
| rs647041   | CHRNA3;CHRNA5 | 15         | 76,667,536 | Intron          | -             | -                 | C            | T            | 0.39                    | 1.00      |                         | 0.83       |         | 0.44                    | 1.00      | 1.00                    |
| rs514743   | CHRNA3;CHRNA5 | 15         | 76,671,282 | Intron          | -             | -                 | A            | T            | 0.35                    | 1.00      |                         | 0.44       |         | 0.39                    | 1.00      | 0.68                    |
| rs578776   | CHRNA3;CHRNA5 | 15         | 76,675,455 | 3' UTR          | -             | -                 | G            | A            | 0.24                    | 1.00      |                         | 0.13       |         | 0.21                    | 1.00      | 0.65                    |
| rs6495307  | CHRNA3;CHRNA5 | 15         | 76,677,376 | Intron          | -             | -                 | C            | T            | 0.39                    | 1.00      |                         | 1.00       |         | 0.44                    | 1.00      | 1.00                    |
| rs1051730  | CHRNA3;CHRNA5 | 15         | 76,681,394 | Coding Region   | Synonymous    | Y215Y (NP_000734) | G            | A            | 0.40                    | 0.99      |                         | 0.83       |         | 0.39                    | 0.99      | 0.17                    |
| rs3743078  | CHRNA3;CHRNA5 | 15         | 76,681,814 | Intron          | -             | -                 | G            | C            | 0.21                    | 1.00      |                         | 0.36       |         | 0.16                    | 1.00      | 0.86                    |
| rs3743077  | CHRNA3;CHRNA5 | 15         | 76,681,951 | Intron          | -             | -                 | C            | T            | 0.36                    | 0.94      |                         | 0.65       |         | 0.42                    | 0.95      | 0.92                    |
| rs1317286  | CHRNA3;CHRNA5 | 15         | 76,683,184 | Intron          | -             | -                 | A            | G            | 0.41                    | 0.99      |                         | 0.83       |         | 0.40                    | 1.00      | 0.41                    |
| rs938652   | CHRNA3        | 15         | 76,683,602 | Intron          | -             | -                 | A            | G            | 0.20                    | 1.00      |                         | 0.27       |         | 0.16                    | 1.00      | 0.58                    |
| rs4887069  | CHRNA3;CHRNA5 | 15         | 76,696,125 | Intron          | -             | -                 | A            | G            | 0.20                    | 0.99      |                         | 0.43       |         | 0.17                    | 1.00      | 0.86                    |
| rs3743075  | CHRNA3;CHRNA5 | 15         | 76,696,507 | Coding Region   | Synonymous    | K97K (NP_000734)  | C            | T            | 0.35                    | 1.00      |                         | 0.37       |         | 0.38                    | 1.00      | 0.34                    |
| rs3743073  | CHRNA3;CHRNA5 | 15         | 76,696,594 | Intron          | -             | -                 | T            | G            | 0.35                    | 0.99      |                         | 0.27       |         | 0.39                    | 1.00      | 0.46                    |
| rs1878399  | CHRNA3;CHRNA5 | 15         | 76,699,058 | Intron          | -             | -                 | C            | G            | 0.39                    | 0.99      |                         | 0.83       |         | 0.44                    | 1.00      | 1.00                    |
| rs6495309  | CHRNA3;CHRNA5 | 15         | 76,702,300 | Flanking 3' UTR | -             | -                 | C            | T            | 0.19                    | 1.00      |                         | 0.08       |         | 0.15                    | 1.00      | 0.44                    |
| rs1948     | CHRNA3;CHRNA5 | 15         | 76,704,454 | 3' UTR          | -             | -                 | G            | A            | 0.33                    | 1.00      |                         | 0.65       |         | 0.35                    | 1.00      | 0.16                    |
| rs7178270  | CHRNA3;CHRNA5 | 15         | 76,708,132 | Intron          | -             | -                 | C            | G            | 0.37                    | 1.00      |                         | 0.91       |         | 0.42                    | 1.00      | 0.54                    |
| rs950776   | CHRNA5        | 15         | 76,713,073 | Intron          | -             | -                 | T            | C            | 0.33                    | 1.00      |                         | 0.43       |         | 0.35                    | 1.00      | 0.16                    |
| rs12441998 | CHRNA5        | 15         | 76,716,427 | Intron          | -             | -                 | A            | G            | 0.18                    | 1.00      |                         | 0.74       |         | 0.17                    | 1.00      | 0.72                    |
| rs1316971  | CHRNA5        | 15         | 76,717,565 | Intron          | -             | -                 | G            | A            | 0.18                    | 1.00      |                         | 0.74       |         | 0.17                    | 1.00      | 0.72                    |
| rs11633223 | CHRNA5        | 15         | 76,722,531 | Flanking 5' UTR | -             | -                 | T            | C            | 0.36                    | 1.00      |                         | 1.00       |         | 0.39                    | 1.00      | 0.12                    |
| rs3917872  | CHRNA5        | 15         | 76,729,090 | Flanking 5' UTR | -             | -                 | C            | T            | 0.09                    | 1.00      |                         | 0.55       |         | 0.09                    | 1.00      | 1.00                    |
| rs2191416  | CREBBP        | 16         | 3,710,730  | Flanking 5' UTR | -             | -                 | G            | A            | 0.26                    | 1.00      |                         | 0.05       |         | 0.24                    | 1.00      | 0.07                    |
| rs9392     | CREBBP        | 16         | 3,715,170  | Flanking 3' UTR | -             | -                 | G            | A            | 0.23                    | 1.00      |                         | 0.08       |         | 0.22                    | 1.00      | 0.56                    |
| rs130008   | CREBBP        | 16         | 3,721,953  | Intron          | -             | -                 | C            | G            | 0.03                    | 1.00      |                         | 1.00       |         | 0.02                    | 1.00      | 1.00                    |
| rs130016   | CREBBP        | 16         | 3,730,308  | Intron          | -             | -                 | C            | T            | 0.50                    | 1.00      |                         | 0.00       |         | 0.50                    | 1.00      | 0.00                    |
| rs129968   | CREBBP        | 16         | 3,731,262  | Intron          | -             | -                 | G            | A            | 0.36                    | 0.96      |                         | 1.00       |         | 0.35                    | 0.98      | 0.32                    |
| rs3025684  | CREBBP        | 16         | 3,735,364  | Intron          | -             | -                 | G            | A            | 0.03                    | 0.98      |                         | 1.00       |         | 0.02                    | 0.97      | 1.00                    |
| rs129963   | CREBBP        | 16         | 3,736,148  | Intron          | -             | -                 | C            | T            | 0.46                    | 1.00      |                         | 0.76       |         | 0.44                    | 1.00      | 0.84                    |
| rs11864123 | CREBBP        | 16         | 3,744,325  | Intron          | -             | -                 | T            | A            | 0.02                    | 1.00      |                         | 1.00       |         | 0.01                    | 1.00      | 1.00                    |
| rs886528   | CREBBP        | 16         | 3,751,557  | Intron          | -             | -                 | A            | G            | 0.44                    | 0.99      |                         | 0.92       |         | 0.46                    | 1.00      | 0.37                    |
| rs13380693 | CREBBP        | 16         | 3,757,049  | Intron          | -             | -                 | T            | C            | 0.02                    | 1.00      |                         | 0.16       |         | 0.02                    | 1.00      | 1.00                    |
| rs12051375 | CREBBP        | 16         | 3,767,554  | Intron          | -             | -                 | G            | A            | 5.08 × 10 <sup>-3</sup> | 1.00      |                         | 1.00       |         | 8.66 × 10 <sup>-3</sup> | 1.00      | 1.00                    |
| rs130002   | CREBBP        | 16         | 3,767,932  | Intron          | -             | -                 | T            | C            | 5.08 × 10 <sup>-3</sup> | 1.00      |                         | 1.00       |         | 8.66 × 10 <sup>-3</sup> | 1.00</    |                         |

| SNP        | Gene Region | Chromosome | Position   | Location        | Coding Status | Amino Acid Change | Major Allele | Minor Allele | Male                    |           |                         |                         | Female  |                         |           |     |
|------------|-------------|------------|------------|-----------------|---------------|-------------------|--------------|--------------|-------------------------|-----------|-------------------------|-------------------------|---------|-------------------------|-----------|-----|
|            |             |            |            |                 |               |                   |              |              | MAF                     | Call Rate | HWE                     | Chi-square              | Exact P | MAF                     | Call Rate | HWE |
| rs17690326 | CRHR1       | 17         | 41,276,754 | Flanking 5' UTR | -             | -                 | T            | C            | 0.22                    | 1.00      | 0.14                    | 0.20                    | 1.00    | 0.44                    |           |     |
| rs242944   | CRHR1       | 17         | 41,278,960 | Coding Region   | Nonsynonymous | R303H (NP_787078) | A            | G            | 0.45                    | 1.00      | 0.08                    | 0.41                    | 1.00    | 0.08                    |           |     |
| rs9909443  | GRB2        | 17         | 70,819,941 | Flanking 3' UTR | -             | -                 | C            | T            | 0.27                    | 1.00      | 0.37                    | 0.25                    | 1.00    | 0.69                    |           |     |
| rs4559942  | GRB2        | 17         | 70,820,864 | Flanking 3' UTR | -             | -                 | A            | G            | 0.28                    | 1.00      | 0.53                    | 0.26                    | 1.00    | 0.70                    |           |     |
| rs6501775  | GRB2        | 17         | 70,822,168 | Flanking 3' UTR | -             | -                 | C            | T            | 0.05                    | 0.99      | 0.22                    | 0.05                    | 1.00    | 0.61                    |           |     |
| rs8081778  | GRB2        | 17         | 70,823,867 | Flanking 3' UTR | -             | -                 | C            | T            | 0.19                    | 1.00      | 0.62                    | 0.19                    | 1.00    | 0.25                    |           |     |
| rs7219     | GRB2        | 17         | 70,826,963 | 3' UTR          | -             | -                 | T            | C            | 0.29                    | 0.99      | 0.62                    | 0.26                    | 1.00    | 0.61                    |           |     |
| rs8079197  | GRB2        | 17         | 70,828,274 | Intron          | -             | -                 | C            | G            | 0.28                    | 1.00      | 0.53                    | 0.26                    | 1.00    | 0.61                    |           |     |
| rs12946365 | GRB2        | 17         | 70,829,239 | Intron          | -             | -                 | T            | C            | 0.29                    | 1.00      | 0.53                    | 0.26                    | 1.00    | 0.61                    |           |     |
| rs12600908 | GRB2        | 17         | 70,839,969 | Flanking 3' UTR | -             | -                 | G            | A            | 0.15                    | 1.00      | 0.54                    | 0.12                    | 1.00    | 0.64                    |           |     |
| rs4789170  | GRB2        | 17         | 70,844,389 | Intron          | -             | -                 | C            | T            | 0.27                    | 1.00      | 0.61                    | 0.25                    | 1.00    | 0.51                    |           |     |
| rs9912608  | GRB2        | 17         | 70,848,626 | Intron          | -             | -                 | C            | G            | 0.27                    | 1.00      | 0.60                    | 0.25                    | 1.00    | 0.51                    |           |     |
| rs4789172  | GRB2        | 17         | 70,853,307 | Intron          | -             | -                 | T            | C            | 0.48                    | 1.00      | 0.09                    | 0.49                    | 1.00    | 0.37                    |           |     |
| rs1369299  | GRB2        | 17         | 70,858,920 | Intron          | -             | -                 | C            | T            | 0.18                    | 1.00      | 1.00                    | 0.18                    | 1.00    | 0.24                    |           |     |
| rs4789176  | GRB2        | 17         | 70,864,463 | Intron          | -             | -                 | T            | A            | 0.18                    | 1.00      | 1.00                    | 0.18                    | 1.00    | 0.40                    |           |     |
| rs4350602  | GRB2        | 17         | 70,867,364 | Intron          | -             | -                 | T            | C            | 0.30                    | 1.00      | 0.81                    | 0.29                    | 1.00    | 0.40                    |           |     |
| rs9902966  | GRB2        | 17         | 70,873,742 | Intron          | -             | -                 | C            | T            | 0.20                    | 1.00      | 0.52                    | 0.19                    | 1.00    | 0.33                    |           |     |
| rs4789178  | GRB2        | 17         | 70,879,837 | Intron          | -             | -                 | G            | C            | 0.20                    | 1.00      | 0.63                    | 0.19                    | 1.00    | 0.33                    |           |     |
| rs4789182  | GRB2        | 17         | 70,886,540 | Intron          | -             | -                 | A            | G            | 0.32                    | 1.00      | 0.64                    | 0.30                    | 1.00    | 0.55                    |           |     |
| rs2053156  | GRB2        | 17         | 70,890,035 | Intron          | -             | -                 | T            | G            | 0.20                    | 1.00      | 0.63                    | 0.19                    | 1.00    | 0.33                    |           |     |
| rs9909076  | GRB2        | 17         | 70,896,404 | Intron          | -             | -                 | T            | G            | 0.20                    | 1.00      | 0.63                    | 0.19                    | 1.00    | 0.33                    |           |     |
| rs4788891  | GRB2        | 17         | 70,902,740 | Intron          | -             | -                 | G            | A            | 0.20                    | 1.00      | 0.63                    | 0.19                    | 1.00    | 0.41                    |           |     |
| rs4789189  | GRB2        | 17         | 70,909,580 | Intron          | -             | -                 | G            | C            | 0.20                    | 0.99      | 0.75                    | 0.19                    | 1.00    | 0.33                    |           |     |
| rs9908820  | GRB2        | 17         | 70,920,414 | Flanking 5' UTR | -             | -                 | G            | A            | 0.33                    | 1.00      | 0.21                    | 0.30                    | 1.00    | 0.56                    |           |     |
| rs8065441  | GRB2        | 17         | 70,922,042 | Flanking 5' UTR | -             | -                 | G            | C            | 0.13                    | 1.00      | 0.08                    | 0.14                    | 1.00    | 0.20                    |           |     |
| rs12608148 | ADCYAP1     | 18         | 879,159    | Flanking 5' UTR | -             | -                 | G            | A            | 0.27                    | 1.00      | 0.52                    | 0.31                    | 1.00    | 0.73                    |           |     |
| rs4797325  | ADCYAP1     | 18         | 879,905    | Flanking 5' UTR | -             | -                 | G            | A            | 0.42                    | 0.99      | 1.00                    | 0.42                    | 0.98    | 0.92                    |           |     |
| rs1599789  | ADCYAP1     | 18         | 881,312    | Flanking 5' UTR | -             | -                 | A            | G            | 0.27                    | 1.00      | 0.09                    | 0.24                    | 1.00    | 0.41                    |           |     |
| rs2040176  | ADCYAP1     | 18         | 882,467    | Flanking 5' UTR | -             | -                 | T            | C            | 0.11                    | 1.00      | 0.45                    | 0.12                    | 1.00    | 0.81                    |           |     |
| rs1916610  | ADCYAP1     | 18         | 882,847    | Flanking 5' UTR | -             | -                 | C            | T            | 0.46                    | 1.00      | 0.31                    | 0.46                    | 1.00    | 0.37                    |           |     |
| rs11081411 | ADCYAP1     | 18         | 883,205    | Flanking 5' UTR | -             | -                 | A            | G            | 0.17                    | 0.99      | 3.29 × 10 <sup>-3</sup> | 0.13                    | 1.00    | 0.03                    |           |     |
| rs11665625 | ADCYAP1     | 18         | 890,332    | Flanking 5' UTR | -             | -                 | G            | A            | 0.47                    | 1.00      | 0.84                    | 0.44                    | 1.00    | 0.69                    |           |     |
| rs12961210 | ADCYAP1     | 18         | 890,523    | Flanking 5' UTR | -             | -                 | T            | G            | 0.32                    | 0.99      | 0.91                    | 0.32                    | 1.00    | 1.00                    |           |     |
| rs9635870  | ADCYAP1     | 18         | 890,765    | Flanking 5' UTR | -             | -                 | G            | A            | 0.30                    | 0.98      | 2.39 × 10 <sup>-3</sup> | 0.27                    | 0.99    | 1.65 × 10 <sup>-3</sup> |           |     |
| rs2846579  | ADCYAP1     | 18         | 891,897    | Flanking 5' UTR | -             | -                 | C            | T            | 0.11                    | 1.00      | 0.45                    | 0.12                    | 1.00    | 1.00                    |           |     |
| rs2846583  | ADCYAP1     | 18         | 892,965    | Flanking 5' UTR | -             | -                 | A            | T            | 0.28                    | 1.00      | 0.71                    | 0.31                    | 1.00    | 0.73                    |           |     |
| rs2846584  | ADCYAP1     | 18         | 894,054    | Flanking 5' UTR | -             | -                 | C            | T            | 0.27                    | 1.00      | 0.80                    | 0.30                    | 1.00    | 0.72                    |           |     |
| rs18192595 | ADCYAP1     | 18         | 897,521    | Intron          | -             | -                 | A            | G            | 0.10                    | 1.00      | 0.23                    | 0.09                    | 1.00    | 1.00                    |           |     |
| rs11659736 | ADCYAP1     | 18         | 905,937    | Flanking 3' UTR | -             | -                 | C            | T            | 0.37                    | 1.00      | 0.75                    | 0.37                    | 1.00    | 0.24                    |           |     |
| rs7228988  | ADCYAP1     | 18         | 907,957    | Flanking 3' UTR | -             | -                 | A            | G            | 0.31                    | 1.00      | 0.48                    | 0.31                    | 1.00    | 0.10                    |           |     |
| rs11663172 | ADCYAP1     | 18         | 910,173    | Flanking 3' UTR | -             | -                 | G            | A            | 0.41                    | 1.00      | 0.84                    | 0.42                    | 1.00    | 0.05                    |           |     |
| rs17501755 | ADCYAP1     | 18         | 910,497    | Flanking 3' UTR | -             | -                 | T            | C            | 0.30                    | 1.00      | 0.48                    | 0.32                    | 1.00    | 0.91                    |           |     |
| rs12373400 | ADCYAP1     | 18         | 913,096    | Flanking 3' UTR | -             | -                 | A            | G            | 0.39                    | 1.00      | 0.52                    | 0.40                    | 1.00    | 0.15                    |           |     |
| rs10853372 | ADCYAP1     | 18         | 913,261    | Flanking 3' UTR | -             | -                 | G            | A            | 0.40                    | 1.00      | 0.60                    | 0.39                    | 1.00    | 6.44 × 10 <sup>-3</sup> |           |     |
| rs16952813 | ADCYAP1     | 18         | 914,630    | Flanking 3' UTR | -             | -                 | G            | A            | 0.08                    | 1.00      | 0.50                    | 0.08                    | 1.00    | 0.50                    |           |     |
| rs17501915 | ADCYAP1     | 18         | 915,250    | Flanking 3' UTR | -             | -                 | G            | A            | 0.30                    | 1.00      | 0.40                    | 0.32                    | 1.00    | 0.91                    |           |     |
| rs4798767  | ADCYAP1     | 18         | 917,475    | Flanking 3' UTR | -             | -                 | A            | T            | 0.41                    | 1.00      | 0.68                    | 0.39                    | 1.00    | 4.83 × 10 <sup>-3</sup> |           |     |
| rs11660066 | ADCYAP1     | 18         | 918,035    | Flanking 3' UTR | -             | -                 | C            | T            | 0.08                    | 1.00      | 0.50                    | 0.08                    | 1.00    | 0.50                    |           |     |
| rs11667211 | KLF16       | 19         | 1,790,483  | Intron          | -             | -                 | C            | T            | 0.16                    | 1.00      | 0.02                    | 0.15                    | 1.00    | 1.00                    |           |     |
| rs893539   | KLF16       | 19         | 1,794,493  | Intron          | -             | -                 | G            | A            | 0.24                    | 0.99      | 0.58                    | 0.25                    | 0.99    | 0.43                    |           |     |
| rs1609761  | KLF16       | 19         | 1,798,698  | Intron          | -             | -                 | A            | C            | 0.20                    | 0.99      | 0.42                    | 0.22                    | 1.00    | 0.37                    |           |     |
| rs893541   | KLF16       | 19         | 1,809,183  | Intron          | -             | -                 | C            | T            | 0.17                    | 1.00      | 1.00                    | 0.19                    | 1.00    | 0.10                    |           |     |
| rs3810417  | KLF16       | 19         | 1,815,601  | Flanking 5' UTR | -             | -                 | C            | T            | 0.16                    | 0.99      | 0.85                    | 0.18                    | 1.00    | 0.09                    |           |     |
| rs10401329 | KLF16       | 19         | 1,822,699  | Flanking 3' UTR | -             | -                 | G            | A            | 0.13                    | 0.95      | 0.64                    | 0.13                    | 0.96    | 0.04                    |           |     |
| rs10423854 | FOXB        | 19         | 50,647,512 | Flanking 5' UTR | -             | -                 | A            | G            | 0.43                    | 1.00      | 0.30                    | 0.41                    | 1.00    | 0.92                    |           |     |
| rs10415949 | FOXB        | 19         | 50,654,639 | Flanking 5' UTR | -             | -                 | A            | G            | 0.23                    | 1.00      | 0.89                    | 0.24                    | 1.00    | 0.27                    |           |     |
| rs2238687  | FOXB        | 19         | 50,665,006 | Intron          | -             | -                 | G            | A            | 0.14                    | 1.00      | 0.67                    | 0.14                    | 1.00    | 0.29                    |           |     |
| rs2276469  | FOXB        | 19         | 50,666,433 | Intron          | -             | -                 | T            | C            | 0.44                    | 0.91      | 0.83                    | 0.46                    | 0.94    | 0.92                    |           |     |
| rs708905   | FOXB        | 19         | 50,669,312 | 3' UTR          | -             | -                 | G            | C            | 0.14                    | 0.99      | 1.00                    | 0.13                    | 0.99    | 0.03                    |           |     |
| rs6509214  | FOXB        | 19         | 50,673,655 | Flanking 3' UTR | -             | -                 | G            | T            | 0.32                    | 1.00      | 0.49                    | 0.34                    | 1.00    | 0.10                    |           |     |
| rs4511641  | FOXB        | 19         | 50,685,408 | Intron          | -             | -                 | C            | A            | 0.45                    | 1.00      | 0.61                    | 0.44                    | 1.00    | 0.84                    |           |     |
| rs6142508  | EPB41L1     | 20         | 34,160,719 | Flanking 5' UTR | -             | -                 | A            | G            | 0.16                    | 1.00      | 0.86                    | 0.18                    | 1.00    | 0.24                    |           |     |
| rs2746103  | EPB41L1     | 20         | 34,167,348 | Flanking 3' UTR | -             | -                 | G            | C            | 0.23                    | 1.00      | 0.31                    | 0.23                    | 1.00    | 0.39                    |           |     |
| rs6141600  | EPB41L1     | 20         | 34,175,724 | Flanking 3' UTR | -             | -                 | T            | C            | 0.30                    | 0.96      | 0.09                    | 0.27                    | 0.98    | 0.61                    |           |     |
| rs6121156  | EPB41L1     | 20         | 34,176,747 | Flanking 3' UTR | -             | -                 | A            | G            | 3.81 × 10 <sup>-3</sup> | 1.00      | 1.00                    | 1.24 × 10 <sup>-3</sup> | 1.00    | 1.00                    |           |     |
| rs6142512  | EPB41L1     | 20         | 34,178,851 | Flanking 3' UTR | -             | -                 | A            | G            | 0.16                    | 1.00      | 0.86                    | 0.18                    | 1.00    | 0.32                    |           |     |
| rs1474976  | EPB41L1     | 20         | 34,195,786 | Flanking 5' UTR | -             | -                 | C            | 0.09         | 1.00                    | 0.76      | 0.12                    | 1.00                    | 0.63    |                         |           |     |
| rs6121163  | EPB41L1     | 20         | 34,200,451 | Flanking 5' UTR | -             | -                 | T            | 0.06         | 1.00                    | 0.38      | 0.05                    | 1.00                    | 0.20    |                         |           |     |
| rs7266316  | EPB41L1     | 20         | 34,203,883 | Flanking 5' UTR | -             | -                 | C            | T            | 0.00                    | 1.00      | NA                      | 1.24 × 10 <sup>-3</sup> | 1.00    | 1.00                    |           |     |
| rs6060831  | EPB41L1     | 20         | 34,209,464 | Intron          | -             | -                 | T            | C            | 1.27 × 10 <sup>-3</sup> | 1.00      | 1.00                    | 0.00                    | 1.00    | NA                      |           |     |
| rs6058429  | EPB41L1     | 20         | 34,219,275 | Intron          | -             | -                 | A            | G            | 0.06                    | 1.00      | 0.38                    | 0.05                    | 1.00    | 0.23                    |           |     |
| rs6060845  | EPB41L1     | 20         | 34,233,225 | Intron          | -             | -                 | A            | G            | 0.24                    | 1.00      | 0.49                    | 0.25                    | 1.00    | 0.60                    |           |     |
| rs2247688  | EPB41L1     | 20         | 34,238,965 | Intron          | -             | -                 | A            | G            | 0.24                    | 1.00      | 0.49                    | 0.25                    | 1.00    | 0.43                    |           |     |
| rs6121179  | EPB41L1     | 20         | 34,256,911 | Intron          | -             | -                 | A            | G            | 0.18                    | 1.00      | 0.40                    | 0.19                    | 0.99    | 0.10                    |           |     |
| rs6119707  | EPB41L1     | 20         | 34,267,901 | Flanking 3' UTR | -             | -                 | A            | NA           | 0.00                    | 0.99      | NA                      | 0.00                    | 1.00    | NA                      |           |     |
| rs11700361 | EPB41L1     | 20         | 34,285,729 | Flanking 3' UTR | -             | -                 | C            | T            | 0.16                    | 1.00      | 0.71                    | 0.18                    | 1.00    | 0.13                    |           |     |
| rs709050   | EPB41L1     | 20         | 34,292,023 | Intron          | -             | -                 | G            | A            | 0.19                    | 1.00      | 0.52                    | 0.19                    | 1.00    | 0.52                    |           |     |
| rs965808   | GNAS        | 20         | 56,841,821 | Flanking 5' UTR | -             | -                 | A            | C            | 0.24                    | 1.00      | 0.89                    | 0.25                    | 1.00    | 0.23                    |           |     |
| rs3761264  | GNAS        | 20         | 56,846,766 | Flanking 5' UTR | -             | -                 | C            | T            | 0.43                    | 1.00      | 0.61                    | 0.45                    | 1.00    | 0.09                    |           |     |
| rs6064714  | GNAS        | 20         | 56,847,535 | Flanking 5' UTR | -             | -                 | A            | G            | 0.14                    | 1.00      | 0.84                    | 0.13                    | 1.00    | 0.27                    |           |     |
| rs1800900  | GNAS        | 20         | 56,848,505 | 3' UTR          | -             | -                 | G            | A            | 0.39                    | 0.94      | 0.74                    | 0.39                    | 0.96    | 0.20                    |           |     |
|            |             |            |            |                 |               |                   |              |              |                         |           |                         |                         |         |                         |           |     |

| SNP        | Gene Region | Chromosome | Position   | Location        | Coding Status | Amino Acid Change | Major Allele | Minor Allele | Male                    |           |      |                         | Female |                         |     |                    |
|------------|-------------|------------|------------|-----------------|---------------|-------------------|--------------|--------------|-------------------------|-----------|------|-------------------------|--------|-------------------------|-----|--------------------|
|            |             |            |            |                 |               |                   |              |              | MAF                     | Call Rate | HWE  | Chi-square Exact P      | MAF    | Call Rate               | HWE | Chi-square Exact P |
| rs2273504  | CHRNA4      | 20         | 61,458,505 | Intron          | -             | -                 | G            | A            | 0.16                    | 0.90      | 0.84 | 0.18                    | 0.91   | 1.00                    |     |                    |
| rs6010918  | CHRNA4      | 20         | 61,459,945 | Intron          | -             | -                 | G            | A            | 0.06                    | 0.92      | 0.63 | 0.04                    | 0.95   | 0.02                    |     |                    |
| rs2273505  | CHRNA4      | 20         | 61,461,322 | Intron          | -             | -                 | C            | T            | 0.07                    | 0.91      | 1.00 | 0.07                    | 0.94   | 0.08                    |     |                    |
| rs755203   | CHRNA4      | 20         | 61,464,708 | Flanking 5' UTR | -             | -                 | A            | G            | 0.44                    | 0.99      | 0.92 | 0.42                    | 0.99   | 0.92                    |     |                    |
| rs4809549  | CHRNA4      | 20         | 61,472,553 | Flanking 5' UTR | -             | -                 | G            | C            | 0.47                    | 1.00      | 0.76 | 0.48                    | 1.00   | 0.37                    |     |                    |
| rs7281533  | CLIC6       | 21         | 34,969,460 | Intron          | -             | -                 | T            | C            | 0.21                    | 1.00      | 0.65 | 0.23                    | 1.00   | 0.39                    |     |                    |
| rs2409531  | CLIC6       | 21         | 34,975,371 | Intron          | -             | -                 | A            | G            | 0.21                    | 1.00      | 0.65 | 0.23                    | 1.00   | 0.39                    |     |                    |
| rs7281040  | CLIC6       | 21         | 34,978,271 | Intron          | -             | -                 | C            | T            | 0.21                    | 1.00      | 0.54 | 0.23                    | 1.00   | 0.39                    |     |                    |
| rs2834578  | CLIC6       | 21         | 34,981,479 | Intron          | -             | -                 | G            | T            | 0.05                    | 1.00      | 0.04 | 0.39                    | 1.00   | 0.25                    |     |                    |
| rs2236610  | CLIC6       | 21         | 34,982,538 | Intron          | -             | -                 | C            | G            | 0.17                    | 0.99      | 0.14 | 0.17                    | 0.97   | 0.73                    |     |                    |
| rs2834586  | CLIC6       | 21         | 34,986,352 | Intron          | -             | -                 | G            | A            | 0.19                    | 1.00      | 0.25 | 0.19                    | 1.00   | 0.26                    |     |                    |
| rs2834587  | CLIC6       | 21         | 34,986,503 | Intron          | -             | -                 | G            | C            | 0.35                    | 1.00      | 0.82 | 0.35                    | 1.00   | 0.83                    |     |                    |
| rs2186287  | CLIC6       | 21         | 34,990,935 | Intron          | -             | -                 | C            | A            | 0.34                    | 0.98      | 0.37 | 0.35                    | 1.00   | 1.00                    |     |                    |
| rs2834590  | CLIC6       | 21         | 34,991,708 | Intron          | -             | -                 | G            | A            | 0.16                    | 1.00      | 0.46 | 0.16                    | 1.00   | 0.10                    |     |                    |
| rs2070367  | CLIC6       | 21         | 35,001,362 | Intron          | -             | -                 | G            | A            | 0.21                    | 1.00      | 0.10 | 0.20                    | 1.00   | 0.28                    |     |                    |
| rs6517254  | CLIC6       | 21         | 35,002,160 | Coding Region   | Synonymous    | F511F (NP_444507) | C            | T            | 0.38                    | 1.00      | 0.52 | 0.38                    | 1.00   | 0.92                    |     |                    |
| rs3819041  | CLIC6       | 21         | 35,003,496 | Intron          | -             | -                 | C            | G            | 0.42                    | 1.00      | 0.15 | 0.40                    | 1.00   | 0.15                    |     |                    |
| rs2834600  | CLIC6       | 21         | 35,007,972 | Intron          | -             | -                 | A            | T            | 0.13                    | 1.00      | 0.04 | 0.14                    | 1.00   | 0.06                    |     |                    |
| rs2834603  | CLIC6       | 21         | 35,014,793 | Flanking 3' UTR | -             | -                 | C            | T            | 0.38                    | 1.00      | 0.06 | 0.05                    | 1.00   | 1.00                    |     |                    |
| rs2834604  | CLIC6       | 21         | 35,014,932 | Flanking 3' UTR | -             | -                 | C            | T            | 0.33                    | 1.00      | 0.26 | 0.37                    | 1.00   | 0.24                    |     |                    |
| rs2834605  | CLIC6       | 21         | 35,019,400 | Flanking 3' UTR | -             | -                 | T            | C            | 0.12                    | 1.00      | 0.06 | 0.14                    | 1.00   | 1.68 × 10 <sup>-3</sup> |     |                    |
| rs11088294 | CLIC6       | 21         | 35,020,213 | Flanking 3' UTR | -             | -                 | G            | A            | 0.24                    | 0.99      | 0.07 | 0.27                    | 1.00   | 0.45                    |     |                    |
| rs1107470  | CLIC6       | 21         | 35,021,758 | Flanking 3' UTR | -             | -                 | T            | A            | 0.21                    | 1.00      | 0.65 | 0.19                    | 1.00   | 0.52                    |     |                    |
| rs4485648  | COMT        | 22         | 18,299,405 | Intron          | -             | -                 | T            | C            | 0.20                    | 1.00      | 0.34 | 0.18                    | 1.00   | 0.17                    |     |                    |
| rs8140265  | COMT        | 22         | 18,301,641 | Flanking 5' UTR | -             | -                 | G            | A            | 0.31                    | 1.00      | 1.00 | 0.27                    | 1.00   | 1.00                    |     |                    |
| rs8137828  | COMT        | 22         | 18,303,406 | Flanking 3' UTR | -             | -                 | C            | T            | 0.44                    | 1.00      | 0.92 | 0.50                    | 1.00   | 1.00                    |     |                    |
| rs2871047  | COMT        | 22         | 18,306,331 | Flanking 5' UTR | -             | -                 | G            | A            | 0.05                    | 0.99      | 0.10 | 0.06                    | 0.99   | 1.00                    |     |                    |
| rs6518592  | COMT        | 22         | 18,307,146 | Flanking 5' UTR | -             | -                 | C            | A            | 0.40                    | 1.00      | 0.92 | 0.45                    | 1.00   | 0.92                    |     |                    |
| rs737865   | COMT        | 22         | 18,310,121 | Intron          | -             | -                 | A            | G            | 0.31                    | 1.00      | 1.00 | 0.28                    | 1.00   | 0.90                    |     |                    |
| rs1544325  | COMT        | 22         | 18,311,668 | Intron          | -             | -                 | G            | A            | 0.40                    | 1.00      | 0.68 | 0.46                    | 1.00   | 0.92                    |     |                    |
| rs174675   | COMT        | 22         | 18,314,051 | Intron          | -             | -                 | C            | T            | 0.28                    | 1.00      | 0.90 | 0.27                    | 1.00   | 0.80                    |     |                    |
| rs5993883  | COMT        | 22         | 18,317,638 | Intron          | -             | -                 | G            | T            | 0.45                    | 1.00      | 0.26 | 0.50                    | 1.00   | 0.55                    |     |                    |
| rs5992500  | COMT        | 22         | 18,321,947 | Intron          | -             | -                 | C            | T            | 5.10 × 10 <sup>-3</sup> | 0.99      | 1.00 | 0.00                    | 1.00   | NA                      |     |                    |
| rs7290221  | COMT        | 22         | 18,322,680 | Intron          | -             | -                 | G            | C            | 0.47                    | 1.00      | 1.00 | 0.48                    | 1.00   | 1.00                    |     |                    |
| rs740603   | COMT        | 22         | 18,325,177 | Intron          | -             | -                 | G            | A            | 0.46                    | 1.00      | 0.92 | 0.49                    | 1.00   | 0.69                    |     |                    |
| rs4646312  | COMT        | 22         | 18,328,337 | Intron          | -             | -                 | T            | C            | 0.40                    | 0.99      | 0.60 | 0.38                    | 1.00   | 0.46                    |     |                    |
| rs165656   | COMT        | 22         | 18,328,863 | Intron          | -             | -                 | C            | G            | 0.49                    | 0.99      | 0.16 | 0.46                    | 0.99   | 0.76                    |     |                    |
| rs4633     | COMT        | 22         | 18,330,235 | Coding Region   | Synonymous    | H12H (NP_009294)  | T            | C            | 0.50                    | 0.99      | 0.19 | 0.47                    | 1.00   | 1.00                    |     |                    |
| rs2239393  | COMT        | 22         | 18,330,428 | Flanking 3' UTR | -             | -                 | A            | G            | 0.41                    | 0.99      | 0.84 | 0.38                    | 1.00   | 0.40                    |     |                    |
| rs4646316  | COMT        | 22         | 18,332,132 | Intron          | -             | -                 | C            | T            | 0.22                    | 0.99      | 0.88 | 0.21                    | 1.00   | 0.55                    |     |                    |
| rs165774   | COMT        | 22         | 18,332,561 | Intron          | -             | -                 | G            | A            | 0.30                    | 0.99      | 0.48 | 0.34                    | 0.99   | 0.27                    |     |                    |
| rs174696   | COMT        | 22         | 18,333,176 | Intron          | -             | -                 | T            | C            | 0.23                    | 1.00      | 0.48 | 0.20                    | 1.00   | 0.88                    |     |                    |
| rs174697   | COMT        | 22         | 18,333,832 | Intron          | -             | -                 | G            | O5           | 0.05                    | 1.00      | 0.05 | 0.05                    | 1.00   | 0.25                    |     |                    |
| rs174699   | COMT        | 22         | 18,334,458 | Intron          | -             | -                 | T            | C            | 0.06                    | 1.00      | 1.00 | 0.05                    | 1.00   | 0.21                    |     |                    |
| rs165599   | COMT        | 22         | 18,336,781 | Flanking 3' UTR | -             | -                 | A            | G            | 0.35                    | 1.00      | 0.91 | 0.30                    | 1.00   | 0.24                    |     |                    |
| rs165824   | COMT        | 22         | 18,339,366 | Intron          | -             | -                 | A            | G            | 0.09                    | 0.95      | 0.75 | 0.08                    | 0.96   | 0.02                    |     |                    |
| rs165815   | COMT        | 22         | 18,339,473 | Coding Region   | Nonsynonymous | Q906R (NP_001661) | T            | C            | 0.16                    | 1.00      | 0.57 | 0.13                    | 1.00   | 0.67                    |     |                    |
| rs5993891  | COMT        | 22         | 18,339,746 | Intron          | -             | -                 | C            | T            | 0.06                    | 0.99      | 0.38 | 0.05                    | 0.99   | 1.00                    |     |                    |
| rs2240713  | COMT        | 22         | 18,341,101 | Intron          | -             | -                 | C            | T            | 0.06                    | 0.99      | 0.62 | 0.05                    | 1.00   | 0.61                    |     |                    |
| rs887199   | COMT        | 22         | 18,341,955 | Intron          | -             | -                 | G            | A            | 0.16                    | 1.00      | 0.45 | 0.13                    | 1.00   | 0.67                    |     |                    |
| rs887200   | COMT        | 22         | 18,343,666 | Intron          | -             | -                 | T            | C            | 0.14                    | 0.97      | 0.83 | 0.12                    | 0.99   | 1.00                    |     |                    |
| rs17759568 | MAPK1       | 22         | 20,440,627 | Flanking 3' UTR | -             | -                 | A            | G            | 0.04                    | 1.00      | 1.00 | 0.04                    | 1.00   | 0.49                    |     |                    |
| rs2276005  | MAPK1       | 22         | 20,443,688 | Flanking 3' UTR | -             | -                 | T            | G            | 0.04                    | 1.00      | 0.29 | 0.04                    | 1.00   | 0.12                    |     |                    |
| rs13515    | MAPK1       | 22         | 20,445,886 | 3' UTR          | -             | -                 | C            | T            | 0.21                    | 0.99      | 1.00 | 0.18                    | 1.00   | 0.25                    |     |                    |
| rs1063311  | MAPK1       | 22         | 20,446,467 | 3' UTR          | Nonsynonymous | R100C (XP_498872) | C            | A            | 0.46                    | 1.00      | 0.26 | 0.43                    | 0.99   | 0.26                    |     |                    |
| rs5755074  | MAPK1       | 22         | 20,451,327 | Flanking 3' UTR | -             | -                 | C            | T            | 0.04                    | 1.00      | 1.00 | 0.04                    | 1.00   | 0.12                    |     |                    |
| rs2266966  | MAPK1       | 22         | 20,451,554 | Flanking 3' UTR | -             | -                 | T            | C            | 0.46                    | 1.00      | 0.54 | 0.43                    | 1.00   | 0.22                    |     |                    |
| rs17759598 | MAPK1       | 22         | 20,452,149 | Flanking 3' UTR | -             | -                 | T            | C            | 0.17                    | 1.00      | 0.72 | 0.14                    | 1.00   | 0.84                    |     |                    |
| rs2298432  | MAPK1       | 22         | 20,453,189 | Flanking 3' UTR | -             | -                 | C            | A            | 0.36                    | 1.00      | 0.27 | 0.35                    | 1.00   | 0.66                    |     |                    |
| rs4821263  | MAPK1       | 22         | 20,457,490 | Intron          | -             | -                 | C            | T            | 0.04                    | 1.00      | 1.00 | 0.04                    | 1.00   | 0.12                    |     |                    |
| rs743409   | MAPK1       | 22         | 20,459,215 | Intron          | -             | -                 | G            | A            | 0.44                    | 1.00      | 0.92 | 0.47                    | 1.00   | 0.02                    |     |                    |
| rs2283791  | MAPK1       | 22         | 20,460,945 | Intron          | -             | -                 | C            | G            | 0.46                    | 0.99      | 0.68 | 0.43                    | 1.00   | 0.22                    |     |                    |
| rs9607272  | MAPK1       | 22         | 20,466,398 | Intron          | -             | -                 | T            | G            | 0.25                    | 1.00      | 0.03 | 0.24                    | 1.00   | 0.42                    |     |                    |
| rs11704205 | MAPK1       | 22         | 20,475,253 | Intron          | -             | -                 | C            | T            | 0.45                    | 1.00      | 0.84 | 0.47                    | 1.00   | 0.04                    |     |                    |
| rs5999550  | MAPK1       | 22         | 20,481,286 | Intron          | -             | -                 | G            | C            | 0.45                    | 1.00      | 0.84 | 0.47                    | 1.00   | 0.04                    |     |                    |
| rs2298434  | MAPK1       | 22         | 20,483,239 | Intron          | -             | -                 | G            | A            | 0.04                    | 1.00      | 0.04 | 0.04                    | 1.00   | 0.12                    |     |                    |
| rs9610355  | MAPK1       | 22         | 20,493,633 | Intron          | -             | -                 | G            | A            | 0.04                    | 1.00      | 1.00 | 0.04                    | 1.00   | 0.12                    |     |                    |
| rs3788332  | MAPK1       | 22         | 20,501,567 | Intron          | -             | -                 | A            | G            | 0.45                    | 1.00      | 0.84 | 0.47                    | 1.00   | 0.05                    |     |                    |
| rs5999704  | MAPK1       | 22         | 20,508,791 | Intron          | -             | -                 | G            | T            | 0.00                    | 1.00      | NA   | 1.24 × 10 <sup>-3</sup> | 1.00   | 1.00                    |     |                    |
| rs1892848  | MAPK1       | 22         | 20,516,562 | Intron          | -             | -                 | C            | T            | 0.45                    | 1.00      | 0.84 | 0.47                    | 1.00   | 0.04                    |     |                    |
| rs9610375  | MAPK1       | 22         | 20,517,093 | Intron          | -             | -                 | G            | T            | 0.49                    | 0.98      | 0.61 | 0.48                    | 0.99   | 0.06                    |     |                    |
| rs5755694  | MAPK1       | 22         | 20,530,530 | Intron          | -             | -                 | C            | T            | 0.43                    | 1.00      | 0.76 | 0.45                    | 1.00   | 0.02                    |     |                    |
| rs8136867  | MAPK1       | 22         | 20,534,793 | Intron          | -             | -                 | A            | G            | 0.43                    | 1.00      | 0.68 | 0.45                    | 1.00   | 0.02                    |     |                    |
| rs2876981  | MAPK1       | 22         | 20,535,611 | Intron          | -             | -                 | A            | C            | 0.42                    | 1.00      | 0.47 | 0.39                    | 1.00   | 0.47                    |     |                    |
| rs9610470  | MAPK1       | 22         | 20,539,139 | Intron          | -             | -                 | T            | C            | 0.26                    | 1.00      | 0.05 | 0.25                    | 1.00   | 0.60                    |     |                    |
| rs4821401  | MAPK1       | 22         | 20,544,572 | Intron          | -             | -                 | T            | C            | 0.04                    | 1.00      | 1.00 | 0.04                    | 1.00   | 0.12                    |     |                    |
| rs5755745  | MAPK1       | 22         | 20,550,816 | Intron          | -             | -                 | T            | C            | 0.04                    | 1.00      | 1.00 | 0.04                    | 1.00   | 0.15                    |     |                    |
| rs5998991  | MAPK1       | 22         | 20,557,038 | Flanking 5' UTR | -             | -                 | A            | C            | 0.00                    | 1.00      | NA   | 1.24 × 10 <sup>-3</sup> | NA     | 1.00                    |     |                    |
| rs9612225  | GNAZ        | 22         | 21,736,619 | Flanking 5' UTR | -             | -                 | G            | A            | 0.26                    | 0.99      | 0.44 | 0.25                    | 1.00   | 1.00                    |     |                    |
| rs13054331 | GNAZ        | 22         | 21,737,063 | Flanking 5' UTR | -             | -                 | G            | A            | 0.26                    | 1.00      | 0.44 | 0.25                    | 1.00   | 0.89                    |     |                    |
| rs9624019  | GNAZ        | 22         | 21,737,301 | Flanking 5' UTR | -             | -                 | A            | C            | 0.09                    | 1.00      | 1.00 | 0.11                    | 1.00   | 0.46                    |     |                    |
| rs3788337  | GNAZ        | 22         | 21,742,017 | Flanking 5' UTR | -             | -                 | G            | A            | 0.36                    | 1.00      | 0.83 | 0.37                    | 1.00   | 0.67                    |     |                    |
| rs3788339  | GNAZ        | 22         | 21,747,677 | In              |               |                   |              |              |                         |           |      |                         |        |                         |     |                    |

| SNP        | Gene Region | Chromosome | Position    | Location        | Coding Status | Amino Acid Change | Major Allele | Minor Allele | Male                    |           |                        | Female                  |           |                        |
|------------|-------------|------------|-------------|-----------------|---------------|-------------------|--------------|--------------|-------------------------|-----------|------------------------|-------------------------|-----------|------------------------|
|            |             |            |             |                 |               |                   |              |              | MAF                     | Call Rate | HWE Chi-square Exact P | MAF                     | Call Rate | HWE Chi-square Exact P |
| rs4824657  | MAOA        | X          | 43,397,246  | Flanking 5' UTR | -             | -                 | C            | G            | 0.30                    | 0.96      | 0.30                   | 0.27                    | 0.96      | 0.30                   |
| rs3788862  | MAOA        | X          | 43,402,308  | Intron          | -             | -                 | G            | A            | 0.30                    | 1.00      | 0.71                   | 0.27                    | 1.00      | 0.71                   |
| rs5906883  | MAOA        | X          | 43,411,887  | Intron          | -             | -                 | C            | A            | 0.30                    | 1.00      | 1.00                   | 0.28                    | 1.00      | 1.00                   |
| rs1465108  | MAOA        | X          | 43,423,153  | Intron          | -             | -                 | G            | A            | 0.30                    | 1.00      | 0.80                   | 0.28                    | 1.00      | 0.80                   |
| rs5906957  | MAOA        | X          | 43,432,254  | Intron          | -             | -                 | G            | A            | 0.26                    | 1.00      | 0.16                   | 0.23                    | 1.00      | 0.16                   |
| rs909525   | MAOA        | X          | 43,438,146  | Intron          | -             | -                 | T            | C            | 0.35                    | 1.00      | 0.56                   | 0.31                    | 1.00      | 0.56                   |
| rs2283725  | MAOA        | X          | 43,444,920  | Intron          | -             | -                 | G            | A            | 0.35                    | 1.00      | 0.49                   | 0.31                    | 1.00      | 0.49                   |
| rs3027399  | MAOA        | X          | 43,477,666  | Intron          | -             | -                 | G            | C            | 0.02                    | 0.99      | 0.09                   | 0.08                    | 1.00      | 0.09                   |
| rs2205718  | MAOA        | X          | 43,482,409  | Intron          | -             | -                 | G            | T            | 0.31                    | 1.00      | 0.90                   | 0.29                    | 1.00      | 0.90                   |
| rs2072743  | MAOA        | X          | 43,484,465  | Intron          | -             | -                 | C            | T            | 0.36                    | 0.99      | 0.57                   | 0.33                    | 1.00      | 0.57                   |
| rs979606   | MAOA        | X          | 43,486,086  | Intron          | -             | -                 | T            | C            | 0.31                    | 1.00      | 0.90                   | 0.29                    | 1.00      | 0.90                   |
| rs3027409  | MAOA        | X          | 43,491,977  | Flanking 3' UTR | -             | -                 | T            | G            | 0.05                    | 1.00      | 1.00                   | 0.04                    | 1.00      | 1.00                   |
| rs2064070  | MAOA        | X          | 43,493,626  | Flanking 3' UTR | -             | -                 | T            | A            | 0.31                    | 0.99      | 0.81                   | 0.30                    | 1.00      | 0.81                   |
| rs6609257  | MAOA        | X          | 43,497,652  | Flanking 3' UTR | -             | -                 | A            | G            | 0.44                    | 1.00      | 0.26                   | 0.40                    | 1.00      | 0.26                   |
| rs3027415  | MAOA        | X          | 43,499,385  | Flanking 3' UTR | -             | -                 | T            | C            | 0.21                    | 1.00      | 0.34                   | 0.24                    | 1.00      | 0.34                   |
| rs3027416  | MAOA        | X          | 43,499,578  | Flanking 3' UTR | -             | -                 | A            | T            | 0.00                    | 0.98      | 1.00                   | 4.98 × 10 <sup>-3</sup> | 1.00      | 1.00                   |
| rs3027421  | MAOB        | X          | 43,504,669  | Flanking 3' UTR | -             | -                 | G            | C            | 0.00                    | 1.00      | 1.00                   | 7.43 × 10 <sup>-3</sup> | 1.00      | 1.00                   |
| rs3027431  | MAOB        | X          | 43,508,028  | Flanking 3' UTR | -             | -                 | G            | A            | 1.27 × 10 <sup>-3</sup> | 1.00      | 1.00                   | 9.90 × 10 <sup>-3</sup> | 1.00      | 1.00                   |
| rs12558036 | MAOB        | X          | 43,508,224  | Flanking 3' UTR | -             | -                 | C            | G            | 0.00                    | 1.00      | 1.00                   | 7.43 × 10 <sup>-3</sup> | 1.00      | 1.00                   |
| rs1040398  | MAOB        | X          | 43,510,375  | Flanking 3' UTR | -             | -                 | A            | G            | 1.27 × 10 <sup>-3</sup> | 1.00      | 1.00                   | 7.43 × 10 <sup>-3</sup> | 1.00      | 1.00                   |
| rs1799836  | MAOB        | X          | 43,512,943  | Intron          | -             | -                 | T            | C            | 0.44                    | 1.00      | 0.69                   | 0.48                    | 1.00      | 0.69                   |
| rs10521432 | MAOB        | X          | 43,518,684  | Intron          | -             | -                 | G            | A            | 0.27                    | 1.00      | 0.16                   | 0.30                    | 1.00      | 0.16                   |
| rs7888450  | MAOB        | X          | 43,518,947  | Intron          | -             | -                 | T            | C            | 1.27 × 10 <sup>-3</sup> | 1.00      | 1.00                   | 4.95 × 10 <sup>-3</sup> | 1.00      | 1.00                   |
| rs17310637 | MAOB        | X          | 43,524,923  | Intron          | -             | -                 | C            | G            | 0.00                    | 1.00      | 1.00                   | 4.95 × 10 <sup>-3</sup> | 1.00      | 1.00                   |
| rs12007768 | MAOB        | X          | 43,530,940  | Intron          | -             | -                 | G            | NA           | 0.00                    | 1.00      | NA                     | 0.00                    | 1.00      | NA                     |
| rs2311013  | MAOB        | X          | 43,536,455  | Intron          | -             | -                 | T            | A            | 0.04                    | 1.00      | 1.00                   | 0.03                    | 1.00      | 1.00                   |
| rs5905449  | MAOB        | X          | 43,540,597  | Intron          | -             | -                 | G            | A            | 0.20                    | 0.99      | 0.35                   | 0.25                    | 1.00      | 0.35                   |
| rs3027459  | MAOB        | X          | 43,546,221  | Intron          | -             | -                 | C            | NA           | 0.00                    | 1.00      | NA                     | 0.00                    | 1.00      | NA                     |
| rs736944   | MAOB        | X          | 43,559,979  | Intron          | -             | -                 | C            | T            | 0.16                    | 1.00      | 1.00                   | 0.18                    | 1.00      | 1.00                   |
| rs17146716 | MAOB        | X          | 43,564,576  | Intron          | -             | -                 | A            | G            | 1.27 × 10 <sup>-3</sup> | 1.00      | 1.00                   | 4.95 × 10 <sup>-3</sup> | 1.00      | 1.00                   |
| rs6651806  | MAOB        | X          | 43,573,908  | Intron          | -             | -                 | A            | C            | 0.28                    | 1.00      | 0.25                   | 0.31                    | 1.00      | 0.25                   |
| rs5952795  | MAOB        | X          | 43,582,223  | Intron          | -             | -                 | G            | NA           | 0.00                    | 1.00      | NA                     | 0.00                    | 1.00      | NA                     |
| rs4824562  | MAOB        | X          | 43,588,734  | Intron          | -             | -                 | T            | C            | 0.15                    | 1.00      | 1.00                   | 0.16                    | 1.00      | 1.00                   |
| rs5952330  | MAOB        | X          | 43,589,225  | Intron          | -             | -                 | A            | G            | 0.00                    | 1.00      | 1.00                   | 3.71 × 10 <sup>-3</sup> | 1.00      | 1.00                   |
| rs5952799  | MAOB        | X          | 43,589,787  | Intron          | -             | -                 | C            | T            | 0.15                    | 0.94      | 0.71                   | 0.16                    | 0.99      | 0.71                   |
| rs5952813  | MAOB        | X          | 43,599,701  | Intron          | -             | -                 | G            | C            | 0.00                    | 1.00      | 1.00                   | 3.71 × 10 <sup>-3</sup> | 1.00      | 1.00                   |
| rs5952340  | MAOB        | X          | 43,605,747  | Intron          | -             | -                 | T            | NA           | 0.00                    | 1.00      | NA                     | 0.00                    | 1.00      | NA                     |
| rs5905512  | MAOB        | X          | 43,611,338  | Intron          | -             | -                 | A            | G            | 0.48                    | 1.00      | 0.69                   | 0.49                    | 1.00      | 0.69                   |
| rs5952352  | MAOB        | X          | 43,613,532  | Intron          | -             | -                 | C            | G            | 0.00                    | 1.00      | 1.00                   | 3.71 × 10 <sup>-3</sup> | 1.00      | 1.00                   |
| rs2070822  | FLNA        | X          | 153,232,642 | Intron          | -             | -                 | A            | G            | 0.22                    | 0.96      | 0.07                   | 0.24                    | 0.96      | 0.07                   |
| rs2070827  | FLNA        | X          | 153,235,897 | Intron          | -             | -                 | G            | A            | 0.10                    | 0.97      | 0.58                   | 0.10                    | 0.99      | 0.58                   |
| rs5945185  | FLNA        | X          | 153,244,670 | Intron          | -             | -                 | T            | G            | 0.20                    | 0.96      | 0.03                   | 0.23                    | 0.98      | 0.03                   |
| rs1064816  | FLNA        | X          | 153,248,322 | Coding Region   | Nonsynonymous | V320A(NP_001447)  | A            | G            | 0.22                    | 0.93      | 1.00                   | 0.24                    | 0.95      | 1.00                   |
| rs17428    | FLNA        | X          | 153,263,157 | Flanking 3' UTR | -             | -                 | C            | T            | 0.19                    | 0.97      | 0.04                   | 0.22                    | 0.98      | 0.04                   |
