# Supplementary material
Source: PubMed Central journal article supplement (PMC3208134)
Supplement: NIHMS305090-supplement-5.pdf [file NIHMS305090-supplement-5.pdf]

| SNP        | Gene Region | Chromosome | Gender | MAF  | N   | Marginal Effect       |                         |                         | Treatment Stratified Effects |                  |                  |                  | Test of Interaction     |            |            |
|------------|-------------|------------|--------|------|-----|-----------------------|-------------------------|-------------------------|------------------------------|------------------|------------------|------------------|-------------------------|------------|------------|
|            |             |            |        |      |     | Likelihood ratio test |                         | Placebo                 | Bupropion                    | Patch            | Spray            | Observed P       | Adjusted P              | Observed P | Adjusted P |
|            |             |            |        |      |     | SNP OR (95% CI)       | Observed P              |                         |                              |                  |                  |                  |                         |            |            |
| rs157198   | EPB41       | 1          | Male   | 0.09 | 385 | 1.22 (0.71-2.08)      | 0.48                    | 0.94                    | 1.26 (0.34-4.72)             | 2.09 (0.78-5.57) | 0.77 (0.24-2.42) | 1.02 (0.34-3.08) | 0.58                    | 0.99       |            |
|            |             |            | Female | 0.08 | 401 | 0.69 (0.33-1.43)      | 0.30                    | 0.98                    | 0.69 (0.15-3.10)             | NA               | 0.60 (0.08-4.66) | 3.00 (0.96-9.36) | 1.71 × 10 <sup>-3</sup> | 0.02       |            |
| rs157220   | EPB41       | 1          | Male   | 0.36 | 383 | 1.42 (0.99-2.03)      | 0.05                    | 0.38                    | 2.05 (0.95-4.42)             | 1.51 (0.82-2.79) | 1.84 (0.91-3.69) | 0.52 (0.21-1.28) | 0.09                    | 0.50       |            |
|            |             |            | Female | 0.38 | 401 | 1.08 (0.75-1.55)      | 0.67                    | 1.00                    | 0.80 (0.36-1.75)             | 1.15 (0.64-2.06) | 1.66 (0.64-4.33) | 1.01 (0.49-2.10) | 0.69                    | 1.00       |            |
| rs126014   | EPB41       | 1          | Male   | 0.37 | 382 | 1.35 (0.81-2.25)      | 0.25                    | 0.83                    | 1.46 (0.42-5.11)             | 2.15 (0.85-5.47) | 2.14 (0.83-5.51) | 0.34 (0.12-0.99) | 0.04                    | 0.31       |            |
|            |             |            | Female | 0.38 | 392 | 1.10 (0.66-1.85)      | 0.71                    | 1.00                    | 1.28 (0.44-3.76)             | 0.89 (0.37-2.11) | 1.13 (0.29-4.33) | 1.28 (0.46-3.61) | 0.94                    | 1.00       |            |
| rs150093   | EPB41       | 1          | Male   | 0.12 | 386 | 1.37 (0.82-2.29)      | 0.24                    | 0.85                    | 1.98 (0.74-5.31)             | 1.48 (0.61-3.58) | 1.28 (0.40-4.10) | 0.77 (0.23-2.63) | 0.69                    | 1.00       |            |
|            |             |            | Female | 0.15 | 403 | 1.12 (0.68-1.85)      | 0.65                    | 1.00                    | 0.49 (0.13-1.81)             | 0.94 (0.40-2.26) | 1.46 (0.42-5.12) | 1.96 (0.80-4.83) | 0.32                    | 0.92       |            |
| rs10915208 | EPB41       | 1          | Male   | 0.12 | 386 | 2.18 (1.28-3.74)      | 5.13 × 10 <sup>-3</sup> | 0.07                    | 2.76 (0.84-9.13)             | 2.04 (0.74-5.61) | 2.11 (0.81-5.45) | 2.01 (0.60-6.73) | 0.98                    | 1.00       |            |
|            |             |            | Female | 0.11 | 403 | 0.63 (0.32-1.23)      | 0.16                    | 0.86                    | 1.48 (0.42-5.19)             | 0.41 (0.13-1.30) | 1.10 (0.26-4.65) | 0.22 (0.03-1.76) | 0.26                    | 0.87       |            |
| rs203298   | EPB41       | 1          | Male   | 0.09 | 386 | 0.97 (0.53-1.77)      | 0.93                    | 0.93                    | 1.08 (0.29-3.94)             | 0.47 (0.10-2.17) | 1.63 (0.64-4.14) | 0.67 (0.17-2.64) | 0.49                    | 0.99       |            |
|            |             |            | Female | 0.08 | 402 | 0.93 (0.49-1.77)      | 0.82                    | 1.00                    | 0.66 (0.15-3.00)             | 1.07 (0.40-2.88) | 2.23 (0.50-9.86) | 0.42 (0.06-2.91) | 0.50                    | 0.98       |            |
| rs203277   | EPB41       | 1          | Male   | 0.28 | 386 | 1.55 (0.95-2.54)      | 0.08                    | 0.48                    | 2.22 (0.70-7.06)             | 2.11 (0.84-5.30) | 1.68 (0.69-4.12) | 0.70 (0.25-1.99) | 0.38                    | 0.96       |            |
|            |             |            | Female | 0.29 | 403 | 1.19 (0.72-1.97)      | 0.49                    | 1.00                    | 1.00 (0.36-2.78)             | 1.20 (0.52-2.78) | 0.52 (0.14-1.97) | 2.35 (0.81-6.83) | 0.36                    | 0.92       |            |
| rs157194   | EPB41       | 1          | Male   | 0.11 | 386 | 1.19 (0.67-2.13)      | 0.56                    | 0.93                    | 0.95 (0.24-3.79)             | 1.27 (0.45-3.58) | 1.35 (0.46-4.00) | 1.12 (0.32-3.97) | 0.98                    | 0.98       |            |
|            |             |            | Female | 0.11 | 403 | 1.15 (0.63-2.11)      | 0.65                    | 1.00                    | 0.57 (0.12-2.73)             | 1.23 (0.48-3.21) | 0.72 (0.08-6.36) | 1.83 (0.63-5.34) | 0.62                    | 1.00       |            |
| rs203278   | EPB41       | 1          | Male   | 0.35 | 386 | 1.44 (1.00-2.09)      | 0.05                    | 0.40                    | 1.33 (0.60-2.94)             | 1.03 (0.51-2.09) | 2.24 (1.11-4.52) | 1.33 (0.60-2.94) | 0.48                    | 0.99       |            |
|            |             |            | Female | 0.34 | 403 | 0.93 (0.64-1.35)      | 0.69                    | 1.00                    | 1.23 (0.57-2.68)             | 0.91 (0.49-1.71) | 1.18 (0.47-3.01) | 0.63 (0.29-1.38) | 0.63                    | 0.99       |            |
| rs157208   | EPB41       | 1          | Male   | 0.24 | 381 | 1.55 (1.04-2.30)      | 0.03                    | 0.28                    | 1.58 (0.67-3.71)             | 1.38 (0.68-2.83) | 1.87 (0.91-3.85) | 1.35 (0.52-3.31) | 0.93                    | 1.00       |            |
|            |             |            | Female | 0.23 | 400 | 0.79 (0.51-1.23)      | 0.29                    | 0.98                    | 0.82 (0.31-2.13)             | 0.74 (0.37-1.50) | 0.80 (0.25-2.63) | 0.85 (0.36-1.98) | 1.00                    | 1.00       |            |
| rs150085   | EPB41       | 1          | Male   | 0.28 | 386 | 1.58 (0.97-2.58)      | 0.07                    | 0.44                    | 2.22 (0.70-7.06)             | 2.11 (0.84-5.30) | 1.77 (0.72-4.35) | 0.70 (0.25-1.99) | 0.37                    | 0.96       |            |
|            |             |            | Female | 0.29 | 403 | 1.19 (0.72-1.97)      | 0.49                    | 1.00                    | 1.00 (0.36-2.78)             | 1.20 (0.52-2.78) | 0.52 (0.14-1.97) | 2.35 (0.81-6.83) | 0.36                    | 0.92       |            |
| rs157213   | EPB41       | 1          | Male   | 0.11 | 385 | 1.19 (0.66-2.12)      | 0.57                    | 0.93                    | 0.93 (0.23-3.72)             | 1.27 (0.45-3.59) | 1.35 (0.46-4.00) | 1.12 (0.32-3.97) | 0.98                    | 1.00       |            |
|            |             |            | Female | 0.11 | 402 | 1.17 (0.64-2.15)      | 0.60                    | 1.00                    | 0.57 (0.12-2.73)             | 1.30 (0.50-3.38) | 0.72 (0.08-6.35) | 1.83 (0.63-5.35) | 0.61                    | 0.99       |            |
| rs150089   | EPB41       | 1          | Male   | 0.32 | 386 | 1.48 (1.02-2.14)      | 0.04                    | 0.33                    | 1.54 (0.69-3.40)             | 1.13 (0.56-2.27) | 2.25 (1.12-4.51) | 1.11 (0.49-2.53) | 0.48                    | 0.99       |            |
|            |             |            | Female | 0.31 | 403 | 0.82 (0.56-1.21)      | 0.32                    | 0.98                    | 0.72 (0.31-1.67)             | 0.87 (0.46-1.63) | 1.16 (0.42-3.15) | 0.69 (0.30-1.55) | 0.87                    | 1.00       |            |
| rs12038347 | EPB41       | 1          | Male   | 0.11 | 386 | 2.26 (1.29-3.95)      | 5.02 × 10 <sup>-3</sup> | 0.07                    | 3.01 (0.90-10.06)            | 1.71 (0.58-5.08) | 2.57 (0.95-6.96) | 2.01 (0.60-6.72) | 0.90                    | 1.00       |            |
|            |             |            | Female | 0.10 | 403 | 0.71 (0.35-1.44)      | 0.33                    | 0.98                    | 1.47 (0.42-5.17)             | 0.63 (0.19-2.05) | 1.29 (0.30-5.48) | NA               | 0.07                    | 0.41       |            |
| rs204057   | EPB41       | 1          | Male   | 0.23 | 386 | 1.86 (1.14-3.03)      | 0.01                    | 0.15                    | 1.14 (0.38-3.41)             | 1.98 (0.80-4.91) | 2.43 (0.97-6.05) | 1.88 (0.66-5.36) | 0.77                    | 1.00       |            |
|            |             |            | Female | 0.23 | 401 | 0.83 (0.50-1.39)      | 0.48                    | 1.00                    | 0.95 (0.32-2.80)             | 0.76 (0.32-1.78) | 0.89 (0.24-3.34) | 0.81 (0.29-2.27) | 0.99                    | 1.00       |            |
| rs204060   | EPB41       | 1          | Male   | 0.27 | 386 | 1.48 (1.00-2.19)      | 0.05                    | 0.38                    | 2.48 (1.07-5.77)             | 1.92 (0.94-3.90) | 1.65 (0.73-3.76) | 0.50 (0.20-1.31) | 0.06                    | 0.37       |            |
|            |             |            | Female | 0.28 | 403 | 0.99 (0.68-1.45)      | 0.96                    | 1.00                    | 0.67 (0.29-1.53)             | 1.10 (0.59-2.06) | 0.89 (0.32-2.42) | 1.28 (0.61-2.70) | 0.68                    | 1.00       |            |
| rs2985319  | EPB41       | 1          | Male   | 0.02 | NA  | NA                    | NA                      | NA                      | NA                           | NA               | NA               | NA               | NA                      | NA         |            |
|            |             |            | Female | 0.01 | NA  | NA                    | NA                      | NA                      | NA                           | NA               | NA               | NA               | NA                      | NA         | NA         |
| rs2985322  | EPB41       | 1          | Male   | 0.32 | 386 | 1.48 (1.02-2.14)      | 0.04                    | 0.33                    | 1.54 (0.69-3.40)             | 1.13 (0.56-2.27) | 2.25 (1.12-4.51) | 1.11 (0.49-2.53) | 0.48                    | 0.99       |            |
|            |             |            | Female | 0.31 | 403 | 0.83 (0.56-1.23)      | 0.34                    | 0.98                    | 0.76 (0.33-1.74)             | 0.87 (0.46-1.63) | 1.15 (0.42-3.15) | 0.69 (0.30-1.55) | 0.88                    | 1.00       |            |
| rs2985344  | EPB41       | 1          | Male   | 0.28 | 385 | 1.54 (0.95-2.52)      | 0.08                    | 0.50                    | 2.22 (0.70-7.06)             | 2.11 (0.84-5.30) | 1.65 (0.67-4.09) | 0.70 (0.25-1.99) | 0.39                    | 0.96       |            |
|            |             |            | Female | 0.29 | 403 | 1.19 (0.72-1.97)      | 0.49                    | 1.00                    | 1.00 (0.36-2.78)             | 1.20 (0.52-2.78) | 0.52 (0.14-1.97) | 2.35 (0.81-6.83) | 0.36                    | 0.92       |            |
| rs2762682  | EPB41       | 1          | Male   | 0.28 | 386 | 1.58 (0.97-2.58)      | 0.07                    | 0.44                    | 2.22 (0.70-7.06)             | 2.11 (0.84-5.30) | 1.77 (0.72-4.35) | 0.70 (0.25-1.99) | 0.37                    | 0.96       |            |
|            |             |            | Female | 0.29 | 403 | 1.19 (0.72-1.97)      | 0.49                    | 1.00                    | 1.00 (0.36-2.78)             | 1.20 (0.52-2.78) | 0.52 (0.14-1.97) | 2.35 (0.81-6.83) | 0.36                    | 0.92       |            |
| rs12021667 | EPB41       | 1          | Male   | 0.40 | 386 | 0.48 (0.32-0.70)      | 8.25 × 10 <sup>-5</sup> | 1.61 × 10 <sup>-3</sup> | 0.20 (0.06-0.62)             | 0.53 (0.27-1.04) | 0.26 (0.12-0.59) | 1.33 (0.62-2.85) | 7.76 × 10 <sup>-3</sup> | 0.08       |            |
|            |             |            | Female | 0.39 | 403 | 1.16 (0.80-1.66)      | 0.44                    | 1.00                    | 1.73 (0.80-3.71)             | 1.02 (0.56-1.88) | 1.04 (0.42-2.57) | 1.01 (0.48-2.15) | 0.71                    | 0.99       |            |
| rs2762686  | EPB41       | 1          | Male   | 0.11 | 386 | 1.17 (0.66-2.10)      | 0.59                    | 0.95                    | 0.95 (0.24-3.79)             | 1.27 (0.45-3.58) | 1.35 (0.46-4.00) | 1.04 (0.30-3.68) | 0.98                    | 1.00       |            |
|            |             |            | Female | 0.11 | 402 | 1.15 (0.63-2.10)      | 0.65                    | 1.00                    | 0.56 (0.12-2.70)             | 1.24 (0.48-3.21) | 0.72 (0.08-6.35) | 1.83 (0.63-5.34) | 0.61                    | 0.99       |            |
| rs2985329  | EPB41       | 1          | Male   | 0.12 | 386 | 1.13 (0.64-1.99)      | 0.68                    | 0.95                    | 0.69 (0.18-2.70)             | 1.19 (0.42-3.33) | 1.57 (0.55-4.43) | 1.05 (0.30-3.68) | 0.82                    | 1.00       |            |
|            |             |            | Female | 0.12 | 402 | 1.20 (0.67-2.16)      | 0.54                    | 1.00                    | 0.48 (0.10-2.29)             | 1.16 (0.45-2.99) | 0.72 (0.08-6.36) | 2.43 (0.87-6.78) | 0.31                    | 0.92       |            |
| rs16837840 | EPB41       | 1          | Male   | 0.11 | 386 | 2.40 (1.38-4.17)      | 2.46 × 10 <sup>-3</sup> | 0.04                    | 3.01 (0.90-10.06)            | 1.71 (0.58-5.07) | 2.57 (0.95-6.97) | 2.62 (0.82-8.40) | 0.91                    | 1.00       |            |
|            |             |            | Female | 0.10 | 403 | 0.70 (0.35-1.41)      | 0.30                    | 0.97                    | 1.47 (0.42-5.17)             | 0.63 (0.19-2.06) | 1.29 (0.30-5.49) | NA               | 0.06                    | 0.36       |            |
| rs2985331  | EPB41       | 1          | Male   | 0.16 | 386 | 1.38 (0.82-2.30)      | 0.23                    | 0.86                    | 2.25 (0.74-6.79)             | 1.69 (0.64-4.43) | 1.64 (0.64-4.17) | 0.43 (0.11-1.65) | 0.22                    | 0.82       |            |
|            |             |            | Female | 0.15 | 402 | 1.08 (0.62-1.89)      | 0.78                    | 1.00                    | 1.24 (0.42-3.68)             | 1.79 (0.70-4.62) | 0.44 (0.09-2.32) | 0.81 (0.26-2.53) | 0.44                    | 0.97       |            |
| rs12072697 | EPB41       | 1          | Male   | 0.09 | 385 | 0.97 (0.53-1.76)      | 0.92                    | 0.93                    | 1.06 (0.29-3.88)             | 0.47 (0.10-2.17) | 1.63 (0.64-4.14) | 0.67 (0.17-2.64) | 0.49                    | 0.99       |            |
|            |             |            | Female | 0.09 | 401 | 0.98 (0.52-1.84)      | 0.96                    | 1.00                    | 0.64 (0.14-2.92)             | 1.24 (0.48-3.20) | 2.21 (0.50-9.76) | 0.42 (0.06-2.87) | 0.45                    | 0.97       |            |
| rs2985332  | EPB41       | 1          | Male   | 0.15 | 373 | 1.08 (0.63-1.87)      | 0.77                    | 0.96                    | 0.60 (0.15-2.34)             | 1.48 (0.56-3.90) | 1.18 (0.44-3.18) | 1.00 (0.28-3.55) | 0.75                    | 1.00       |            |
|            |             |            | Female | 0.15 | 395 | 0.98 (0.55-1.73)      | 0.94                    | 1.00                    | 0.46 (0.10-2.18)             | 0.99 (0.40-2.45) | 0.46 (0.05-4.03) | 1.82 (0.65-5.08) | 0.40                    | 0.95       |            |
| rs2985335  | EPB41       | 1          | Male   | 0.12 | 386 | 1.09 (0.62-1.93)      | 0.76                    | 0.98                    | 0.69 (0.18-2.70)             | 1.07 (0.39-2.99) | 1.57 (0.56-4.43) | 1.05 (0.30-3.68) | 0.82                    | 1.00       |            |
|            |             |            | Female | 0.12 | 403 | 1.20 (0.67-2.16)      | 0.54                    | 1.00                    | 0.49 (0.10-2.32)             | 1.15 (0.45-2.99) | 0.72 (0.08-6.37) | 2.43 (0.87-6.78) | 0.32                    | 0.92       |            |
| rs11807517 | EPB41       | 1          | Male   | 0.00 | NA  | NA                    | NA                      | NA                      | NA                           | NA               | NA               | NA               | NA                      | NA         |            |
|            |             |            | Female | 0.00 | NA  | NA                    | NA                      | NA                      | NA                           | NA               | NA               | NA               | NA                      | NA         | NA         |
| rs10915216 | EPB41       | 1          | Male   | 0.50 | 384 | 0.67 (0.47-0.95)      | 0.02                    | 0.24                    | 0.36 (0.15-0.90)             | 0.64 (0.34-1.19) | 0.48 (0.24-0.95) | 1.75 (0.80-3.82) | 0.03                    | 0.23       |            |
|            |             |            | Female | 0.49 | 402 | 1.04 (0.74-1.46)      | 0.83                    | 1.00                    | 1.79 (0.86-3.71)             | 0.95 (0.54-1.67) | 1.07 (0.45-2.55) | 0.68 (0.33-1.41) | 0.30                    | 0.91       |            |
| rs2486200  | EPB41       | 1          | Male   | 0.23 | 386 | 1.20 (0.73-1.95)      | 0.47                    | 0.94                    | 0.89 (0.29-2.73)             | 1.25 (0.50-3.13) | 1.59 (0.65-3.90) | 0.99 (0.34-2.88) | 0.85                    | 1.00       |            |
|            |             |            | Female | 0.22 | 402 | 0.97 (0.58-1.63)      | 0.90                    | 1.00                    | 0.37 (0.10-1.40)             | 0.89 (0.38-2.07) | 1.48 (0.39-5.67) | 1.71 (0.63-4.63) | 0.26                    | 0.86       |            |
| rs12027267 | EPB41       | 1          | Male   | 0.40 | 385 | 0.46 (0.31-0.68)      | 3.89 × 10 <sup>-5</sup> | 7.95 × 10 <sup>-4</sup> | 0.18 (0.06-0.57)             | 0.53 (0.27-1.04) | 0.26 (0.12-0.59) | 1.20 (0.57-2.55) | 0.01                    | 0.10       |            |
|            |             |            | Female | 0.39 | 403 | 1.17 (0.81-1.69)      | 0.40                    | 0.99                    | 1.74 (0.81-3.74)             | 1.00 (0.54-1.85) | 1.04 (0.42-2.5   |                  |                         |            |            |

| SNP        | Gene Region | Chromosome | Gender | MAF  | N   | Marginal Effect       |                         |            | Treatment Stratified Effects |                  |                   |                   | Test of Interaction     |                 |       |  |            |            |
|------------|-------------|------------|--------|------|-----|-----------------------|-------------------------|------------|------------------------------|------------------|-------------------|-------------------|-------------------------|-----------------|-------|--|------------|------------|
|            |             |            |        |      |     | Likelihood ratio test |                         |            | Placebo                      |                  | Bupropion         |                   | Patch                   |                 | Spray |  | Observed P | Adjusted P |
|            |             |            |        |      |     | SNP OR (95% CI)       | Observed P              | Adjusted P | SNP OR (95% CI)              | SNP OR (95% CI)  | SNP OR (95% CI)   | SNP OR (95% CI)   | SNP OR (95% CI)         | SNP OR (95% CI) |       |  |            |            |
| rs10798880 | HCRTR1      | 1          | Male   | 0.38 | 386 | 1.07 (0.75-1.54)      | 0.70                    | 0.92       | 1.31 (0.58-3.00)             | 1.16 (0.61-2.22) | 1.25 (0.67-2.35)  | 0.57 (0.24-1.37)  | 0.46                    | 0.81            |       |  |            |            |
|            |             |            | Female | 0.41 | 403 | 0.75 (0.52-1.09)      | 0.13                    | 0.38       | 0.46 (0.20-1.05)             | 0.72 (0.39-1.32) | 0.79 (0.29-2.12)  | 1.21 (0.58-2.52)  | 0.38                    | 0.47            |       |  |            |            |
| rs7546297  | HCRTR1      | 1          | Male   | 0.37 | 386 | 0.99 (0.60-1.63)      | 0.97                    | 0.97       | 1.81 (0.53-6.21)             | 0.97 (0.38-2.46) | 1.29 (0.53-3.17)  | 0.43 (0.15-1.24)  | 0.30                    | 0.61            |       |  |            |            |
|            |             |            | Female | 0.41 | 403 | 0.70 (0.42-1.18)      | 0.18                    | 0.46       | 0.36 (0.13-1.02)             | 0.59 (0.25-1.41) | 1.22 (0.33-4.61)  | 1.31 (0.42-4.05)  | 0.30                    | 0.53            |       |  |            |            |
| rs7524405  | HCRTR1      | 1          | Male   | 0.39 | 386 | 1.05 (0.64-1.74)      | 0.84                    | 0.96       | 1.89 (0.55-6.51)             | 1.08 (0.42-2.80) | 1.38 (0.56-3.42)  | 0.43 (0.15-1.23)  | 0.26                    | 0.55            |       |  |            |            |
|            |             |            | Female | 0.41 | 402 | 0.66 (0.39-1.11)      | 0.12                    | 0.35       | 0.32 (0.11-0.91)             | 0.59 (0.25-1.41) | 1.10 (0.29-4.16)  | 1.23 (0.39-3.81)  | 0.30                    | 0.53            |       |  |            |            |
| rs7539745  | CHRN2       | 1          | Male   | 0.13 | 386 | 1.56 (0.90-2.70)      | 0.12                    | 0.53       | 0.61 (0.16-2.37)             | 3.10 (1.08-8.91) | 1.37 (0.49-3.83)  | 1.81 (0.59-5.59)  | 0.28                    | 0.45            |       |  |            |            |
|            |             |            | Female | 0.15 | 402 | 1.11 (0.64-1.93)      | 0.71                    | 0.98       | 4.54 (1.56-13.25)            | 0.65 (0.24-1.79) | 0.19 (0.02-1.54)  | 1.18 (0.40-3.49)  | 7.55 × 10 <sup>-3</sup> | 0.03            |       |  |            |            |
| rs7543174  | CHRN2       | 1          | Male   | 0.14 | 386 | 1.32 (0.77-2.27)      | 0.32                    | 0.80       | 0.31 (0.06-1.48)             | 2.20 (0.80-6.06) | 1.53 (0.57-4.12)  | 1.71 (0.56-5.23)  | 0.14                    | 0.34            |       |  |            |            |
|            |             |            | Female | 0.18 | 403 | 1.02 (0.60-1.74)      | 0.95                    | 0.95       | 4.07 (1.41-11.75)            | 0.76 (0.30-1.93) | 0.15 (0.02-1.22)  | 0.92 (0.31-2.69)  | 7.61 × 10 <sup>-3</sup> | 0.03            |       |  |            |            |
| rs4845652  | CHRN2       | 1          | Male   | 0.09 | 386 | 1.44 (0.83-2.50)      | 0.20                    | 0.72       | 0.22 (0.03-1.78)             | 2.16 (0.80-5.86) | 1.44 (0.51-4.06)  | 2.84 (0.88-9.16)  | 0.07                    | 0.23            |       |  |            |            |
|            |             |            | Female | 0.09 | 403 | 0.95 (0.51-1.77)      | 0.87                    | 0.98       | 3.14 (0.99-9.99)             | 0.49 (0.15-1.64) | NA                | 1.22 (0.38-3.87)  | 0.03                    | 0.11            |       |  |            |            |
| rs2072658  | CHRN2       | 1          | Male   | 0.01 | NA  | NA                    | NA                      | NA         | NA                           | NA               | NA                | NA                | NA                      | NA              |       |  |            |            |
|            |             |            | Female | 0.02 | NA  | NA                    | NA                      | NA         | NA                           | NA               | NA                | NA                | NA                      | NA              |       |  |            |            |
| rs2072659  | CHRN2       | 1          | Male   | 0.11 | 349 | 0.44 (0.20-0.98)      | 0.03                    | 0.21       | 0.39 (0.05-3.37)             | 0.26 (0.05-1.24) | 1.65 (0.45-6.05)  | 0.15 (0.02-1.24)  | 0.16                    | 0.36            |       |  |            |            |
|            |             |            | Female | 0.10 | 376 | 0.89 (0.45-1.76)      | 0.74                    | 0.98       | 0.33 (0.04-2.75)             | 1.12 (0.41-3.03) | 1.46 (0.26-8.05)  | 0.80 (0.20-3.19)  | 0.67                    | 0.83            |       |  |            |            |
| rs2072660  | CHRN2       | 1          | Male   | 0.25 | 382 | 0.57 (0.34-0.95)      | 0.03                    | 0.19       | 0.38 (0.12-1.23)             | 0.20 (0.07-0.60) | 1.24 (0.50-3.04)  | 0.92 (0.32-2.66)  | 0.05                    | 0.18            |       |  |            |            |
|            |             |            | Female | 0.22 | 402 | 0.51 (0.29-0.89)      | 0.01                    | 0.08       | 0.73 (0.24-2.27)             | 0.22 (0.07-0.69) | 1.25 (0.34-4.52)  | 0.50 (0.17-1.45)  | 0.21                    | 0.52            |       |  |            |            |
| rs2072661  | CHRN2       | 1          | Male   | 0.26 | 386 | 0.59 (0.35-0.97)      | 0.04                    | 0.21       | 0.42 (0.13-1.35)             | 0.17 (0.06-0.52) | 1.41 (0.58-3.44)  | 0.96 (0.33-2.78)  | 0.02                    | 0.08            |       |  |            |            |
|            |             |            | Female | 0.22 | 403 | 0.51 (0.29-0.89)      | 0.01                    | 0.08       | 0.67 (0.22-2.07)             | 0.22 (0.07-0.70) | 1.32 (0.36-4.81)  | 0.53 (0.18-1.52)  | 0.21                    | 0.51            |       |  |            |            |
| rs3811450  | CHRN2       | 1          | Male   | 0.08 | 385 | 0.64 (0.31-1.35)      | 0.23                    | 0.72       | 0.59 (0.12-2.91)             | 0.67 (0.19-2.31) | 1.08 (0.27-4.33)  | 0.28 (0.03-2.37)  | 0.75                    | 0.75            |       |  |            |            |
|            |             |            | Female | 0.07 | 402 | 0.30 (0.10-0.87)      | 0.01                    | 0.07       | NA                           | 0.15 (0.02-1.16) | 1.38 (0.26-7.42)  | 0.30 (0.04-2.50)  | 0.24                    | 0.10            |       |  |            |            |
| rs9616     | CHRN2       | 1          | Male   | 0.29 | 386 | 1.04 (0.72-1.51)      | 0.83                    | 0.83       | 3.35 (1.24-9.08)             | 1.25 (0.64-2.45) | 0.83 (0.42-1.62)  | 0.47 (0.19-1.17)  | 0.02                    | 0.10            |       |  |            |            |
|            |             |            | Female | 0.27 | 403 | 1.31 (0.90-1.93)      | 0.17                    | 0.57       | 0.71 (0.30-1.66)             | 1.43 (0.71-2.85) | 1.44 (0.58-3.55)  | 1.96 (0.92-4.18)  | 0.33                    | 0.60            |       |  |            |            |
| rs1127314  | CHRN2       | 1          | Male   | 0.31 | 386 | 0.88 (0.62-1.27)      | 0.50                    | 0.80       | 0.48 (0.20-1.19)             | 0.66 (0.32-1.33) | 1.21 (0.64-2.27)  | 1.38 (0.63-2.99)  | 0.19                    | 0.41            |       |  |            |            |
|            |             |            | Female | 0.29 | 403 | 0.53 (0.34-0.82)      | 2.48 × 10 <sup>-3</sup> | 0.02       | 0.64 (0.26-1.54)             | 0.34 (0.15-0.80) | 1.23 (0.48-3.15)  | 0.41 (0.17-0.98)  | 0.22                    | 0.53            |       |  |            |            |
| rs1127313  | CHRN2       | 1          | Male   | 0.46 | 386 | 0.81 (0.47-1.38)      | 0.43                    | 0.82       | 2.99 (0.62-14.36)            | 0.78 (0.28-2.22) | 0.91 (0.35-2.34)  | 0.27 (0.09-0.82)  | 0.07                    | 0.24            |       |  |            |            |
|            |             |            | Female | 0.47 | 403 | 1.49 (0.83-2.68)      | 0.17                    | 0.52       | 1.38 (0.41-4.65)             | 1.53 (0.56-4.22) | 1.71 (0.34-8.70)  | 1.45 (0.49-4.25)  | 1.00                    | 1.00            |       |  |            |            |
| rs2131902  | CHRN2       | 1          | Male   | 0.32 | 386 | 0.82 (0.50-1.33)      | 0.42                    | 0.82       | 0.40 (0.13-1.22)             | 0.55 (0.22-1.36) | 1.28 (0.52-3.15)  | 1.45 (0.51-4.11)  | 0.21                    | 0.36            |       |  |            |            |
|            |             |            | Female | 0.30 | 403 | 0.49 (0.29-0.82)      | 5.66 × 10 <sup>-3</sup> | 0.04       | 0.67 (0.24-1.86)             | 0.31 (0.12-0.79) | 1.39 (0.38-4.99)  | 1.34 (0.12-9.04)  | 0.23                    | 0.49            |       |  |            |            |
| rs3766927  | CHRN2       | 1          | Male   | 0.31 | 386 | 0.86 (0.53-1.39)      | 0.53                    | 0.78       | 0.56 (0.19-1.67)             | 0.59 (0.24-1.46) | 1.07 (0.44-2.60)  | 1.53 (0.54-4.33)  | 0.44                    | 0.57            |       |  |            |            |
|            |             |            | Female | 0.29 | 403 | 0.45 (0.26-0.76)      | 2.24 × 10 <sup>-3</sup> | 0.02       | 0.56 (0.20-1.59)             | 0.26 (0.10-0.71) | 1.30 (0.36-4.69)  | 0.35 (0.13-0.99)  | 0.24                    | 0.49            |       |  |            |            |
| rs6700238  | NTRK1       | 1          | Male   | 0.00 | NA  | NA                    | NA                      | NA         | NA                           | NA               | NA                | NA                | NA                      | NA              |       |  |            |            |
|            |             |            | Female | 0.00 | NA  | NA                    | NA                      | NA         | NA                           | NA               | NA                | NA                | NA                      | NA              |       |  |            |            |
| rs1800878  | NTRK1       | 1          | Male   | 0.02 | NA  | NA                    | NA                      | NA         | NA                           | NA               | NA                | NA                | NA                      | NA              |       |  |            |            |
|            |             |            | Female | 0.03 | NA  | NA                    | NA                      | NA         | NA                           | NA               | NA                | NA                | NA                      | NA              |       |  |            |            |
| rs1800879  | NTRK1       | 1          | Male   | 0.38 | 386 | 0.84 (0.59-1.20)      | 0.34                    | 0.84       | 1.32 (0.59-2.92)             | 0.90 (0.47-1.73) | 0.39 (0.19-0.83)  | 1.36 (0.62-2.97)  | 0.07                    | 0.19            |       |  |            |            |
|            |             |            | Female | 0.36 | 403 | 0.70 (0.47-1.03)      | 0.07                    | 0.33       | 1.07 (0.52-2.20)             | 0.76 (0.39-1.49) | 0.60 (0.23-1.58)  | 0.40 (0.17-0.97)  | 0.38                    | 0.70            |       |  |            |            |
| rs6334     | NTRK1       | 1          | Male   | 0.21 | 386 | 1.50 (0.92-2.45)      | 0.11                    | 0.49       | 2.54 (0.82-7.83)             | 1.54 (0.61-3.91) | 2.13 (0.86-5.24)  | 0.48 (0.14-1.61)  | 0.15                    | 0.33            |       |  |            |            |
|            |             |            | Female | 0.23 | 403 | 1.11 (0.67-1.84)      | 0.69                    | 0.99       | 1.06 (0.38-2.94)             | 1.33 (0.57-3.10) | 1.49 (0.41-5.39)  | 0.73 (0.25-2.13)  | 0.81                    | 0.81            |       |  |            |            |
| rs6336     | NTRK1       | 1          | Male   | 0.06 | 386 | 1.25 (0.61-2.55)      | 0.55                    | 0.80       | 2.32 (0.61-8.82)             | 1.49 (0.45-4.98) | 1.27 (0.31-5.21)  | NA                | 0.16                    | 0.28            |       |  |            |            |
|            |             |            | Female | 0.05 | 403 | 0.97 (0.41-2.27)      | 0.94                    | 0.94       | 0.36 (0.05-2.79)             | 1.09 (0.27-4.37) | 1.31 (0.14-14.42) | 2.48 (0.38-16.08) | 0.54                    | 0.81            |       |  |            |            |
| rs2644596  | NTRK1       | 1          | Male   | 0.21 | 386 | 1.06 (0.69-1.64)      | 0.79                    | 0.79       | 1.03 (0.37-3.81)             | 0.86 (0.38-1.96) | 1.54 (0.70-3.41)  | 0.86 (0.33-2.24)  | 0.73                    | 0.73            |       |  |            |            |
|            |             |            | Female | 0.21 | 403 | 0.97 (0.62-1.53)      | 0.91                    | 1.00       | 1.28 (0.54-3.06)             | 1.11 (0.53-2.30) | 1.11 (0.35-3.54)  | 0.51 (0.18-1.45)  | 0.54                    | 0.73            |       |  |            |            |
| rs943551   | NTRK1       | 1          | Male   | 0.06 | 386 | 0.60 (0.25-1.41)      | 0.22                    | 0.72       | 2.17 (0.50-9.42)             | 0.76 (0.19-3.06) | NA                | 0.57 (0.06-5.03)  | 0.05                    | 0.16            |       |  |            |            |
|            |             |            | Female | 0.06 | 403 | 1.38 (0.67-2.80)      | 0.39                    | 0.89       | 1.83 (0.51-6.55)             | 1.86 (0.57-6.11) | NA                | 1.18 (0.29-4.77)  | 0.37                    | 0.75            |       |  |            |            |
| rs943552   | NTRK1       | 1          | Male   | 0.06 | 385 | 0.59 (0.25-1.40)      | 0.22                    | 0.72       | 2.13 (0.49-9.27)             | 0.76 (0.19-3.07) | NA                | 0.57 (0.06-5.04)  | 0.05                    | 0.16            |       |  |            |            |
|            |             |            | Female | 0.06 | 403 | 1.38 (0.67-2.80)      | 0.39                    | 0.89       | 1.83 (0.51-6.55)             | 1.86 (0.57-6.11) | NA                | 1.18 (0.29-4.77)  | 0.37                    | 0.75            |       |  |            |            |
| rs2768762  | NTRK1       | 1          | Male   | 0.21 | 386 | 1.19 (0.72-1.95)      | 0.50                    | 0.86       | 3.60 (1.16-11.17)            | 1.08 (0.42-2.81) | 0.72 (0.28-1.84)  | 0.95 (0.33-2.74)  | 0.16                    | 0.32            |       |  |            |            |
|            |             |            | Female | 0.19 | 403 | 1.02 (0.60-1.73)      | 0.93                    | 1.00       | 2.21 (0.79-6.19)             | 1.18 (0.49-2.87) | 0.28 (0.06-1.42)  | 0.74 (0.24-2.28)  | 0.14                    | 0.36            |       |  |            |            |
| rs2644620  | NTRK1       | 1          | Male   | 0.11 | 386 | 1.24 (0.70-2.20)      | 0.47                    | 0.89       | 3.10 (0.92-10.40)            | 1.22 (0.38-3.91) | 1.97 (0.74-5.24)  | 0.14 (0.02-1.15)  | 0.02                    | 0.07            |       |  |            |            |
|            |             |            | Female | 0.13 | 403 | 0.91 (0.50-1.64)      | 0.75                    | 0.99       | 1.87 (0.64-5.45)             | 1.00 (0.35-2.80) | 0.45 (0.09-2.29)  | 0.51 (0.13-1.94)  | 0.35                    | 0.74            |       |  |            |            |
| rs1186675  | KCNJ9       | 1          | Male   | 0.12 | 385 | 1.06 (0.63-1.81)      | 0.82                    | 1.00       | 0.26 (0.03-1.23)             | 1.82 (0.73-4.53) | 0.90 (0.35-2.28)  | 1.21 (0.37-3.91)  | 0.27                    | 0.60            |       |  |            |            |
|            |             |            | Female | 0.12 | 403 | 1.00 (0.57-1.77)      | 0.99                    | 0.99       | 0.91 (0.29-2.82)             | 1.47 (0.63-3.44) | 0.39 (0.05-3.32)  | 0.81 (0.24-2.77)  | 0.61                    | 0.78            |       |  |            |            |
| rs4656874  | KCNJ9       | 1          | Male   | 0.28 | 386 | 0.99 (0.67-1.46)      | 0.95                    | 1.00       | 2.58 (1.15-5.76)             | 0.85 (0.41-1.74) | 0.88 (0.39-2.00)  | 0.43 (0.16-1.12)  | 0.03                    | 0.10            |       |  |            |            |
|            |             |            | Female | 0.30 | 403 | 0.84 (0.57-1.23)      | 0.36                    | 0.81       | 0.66 (0.27-1.63)             | 0.59 (0.30-1.15) | 1.08 (0.39-3.02)  | 1.31 (0.60-2.60)  | 0.36                    | 0.74            |       |  |            |            |
| rs4656876  | KCNJ9       | 1          | Male   | 0.45 | 386 | 0.99 (0.70-1.40)      | 0.95                    | 1.00       | 1.72 (0.79-3.72)             | 1.11 (0.60-2.05) | 0.99 (0.50-1.93)  | 0.46 (0.20-1.04)  | 0.12                    | 0.33            |       |  |            |            |
|            |             |            | Female | 0.47 | 403 | 0.92 (0.66-1.30)      | 0.65                    | 0.95       | 0.80 (0.38-1.70)             | 0.68 (0.38-1.21) | 1.05 (0.46-2.43)  | 1.46 (0.74-2.88)  | 0.37                    | 0.68            |       |  |            |            |
| rs2737703  | KCNJ9       | 1          | Male   | 0.33 | 381 | 0.73 (0.45-1.19)      | 0.20                    | 0.68       | 1.51 (0.47-4.83)             | 0.67 (0.27-1.67) | 0.81 (0.33-1.97)  | 0.36 (0.12-1.08)  | 0.34                    | 0.59            |       |  |            |            |
|            |             |            | Female | 0.35 | 402 | 0.96 (0.58-1.60)      | 0.89                    | 0.99       | 1.27 (0.43-3.72)             | 0.40 (0.17-0.94) | 1.48 (0.40-5.57)  | 2.07 (0.72-6.01)  | 0.07                    | 0.22            |       |  |            |            |
| rs2753268  | KCNJ9       | 1          | Male   | 0.28 | 386 | 0.94 (0.58-1.53)      | 0.80                    | 1.00       | 2.20 (0.69-7.00)             | 0.92 (0.37-2.26) | 0.92 (0.37-2.29)  | 0.46 (0.16-1.37)  | 0.27                    | 0.60            |       |  |            |            |
|            |             |            | Female | 0.29 | 403 | 0.78 (0.47-1.30)      | 0.34                    | 0.80       | 0.73 (0.26-2.04)             | 0.50 (0.21-1.19) | 0.87 (0.23-3.28)  | 1.45 (0.53-3.95)  | 0.46                    | 0.71            |       |  |            |            |
| rs2494211  | KCNJ9       | 1          | Male   | 0.33 | 385 | 0.81 (0.50-1.32)      | 0.40                    | 0.92       | 1.51 (0.47-4.83)             | 0.84 (0.34-2.09) | 0.84 (0.35-2.06)  | 0.43 (0.15-1.23)  | 0.46                    | 0.73            |       |  |            |            |
|            |             |            | Female | 0.35 | 403 | 0.91 (0.55-1.51)      | 0.73                    | 0.96       | 1.20 (0.41-3.53)             | 0.42 (0.18-1.00) | 1.06 (0.30-3.83)  | 1.98 (0.68-5.73)  | 0.16                    | 0.36            |       |  |            |            |
| rs3180694  | KCNJ9       |            |        |      |     |                       |                         |            |                              |                  |                   |                   |                         |                 |       |  |            |            |

| SNP        | Gene Region  | Chromosome | Gender | MAF  | N   | Marginal Effect       |            |            | Treatment Stratified Effects |                  |                  |                  | Test of Interaction |                 |       |  |            |            |
|------------|--------------|------------|--------|------|-----|-----------------------|------------|------------|------------------------------|------------------|------------------|------------------|---------------------|-----------------|-------|--|------------|------------|
|            |              |            |        |      |     | Likelihood ratio test |            |            | Placebo                      |                  | Bupropion        |                  | Patch               |                 | Spray |  | Observed P | Adjusted P |
|            |              |            |        |      |     | SNP OR (95% CI)       | Observed P | Adjusted P | SNP OR (95% CI)              | SNP OR (95% CI)  | SNP OR (95% CI)  | SNP OR (95% CI)  | SNP OR (95% CI)     | SNP OR (95% CI) |       |  |            |            |
| rs1150144  | <i>NR4A2</i> | 2          | Male   | 0.28 | 386 | 1.02 (0.63-1.66)      | 0.94       | 0.94       | 0.52 (0.17-1.60)             | 1.83 (0.73-4.59) | 0.80 (0.32-1.98) | 1.19 (0.42-3.35) | 0.34                | 0.71            |       |  |            |            |
|            |              |            | Female | 0.30 | 403 | 0.91 (0.55-1.50)      | 0.70       | 0.99       | 1.12 (0.40-3.12)             | 1.34 (0.57-3.15) | 0.86 (0.23-3.23) | 0.44 (0.16-1.24) | 0.41                | 0.78            |       |  |            |            |
| rs12803    | <i>NR4A2</i> | 2          | Male   | 0.46 | 386 | 1.22 (0.86-1.72)      | 0.26       | 0.66       | 0.93 (0.44-1.96)             | 1.63 (0.86-3.12) | 0.95 (0.50-1.80) | 1.55 (0.72-3.34) | 0.51                | 0.90            |       |  |            |            |
|            |              |            | Female | 0.49 | 403 | 1.06 (0.75-1.49)      | 0.75       | 0.99       | 0.92 (0.44-1.91)             | 1.06 (0.60-1.87) | 1.81 (0.67-4.94) | 0.92 (0.48-1.78) | 0.69                | 0.94            |       |  |            |            |
| rs13428968 | <i>NR4A2</i> | 2          | Male   | 0.17 | 386 | 1.44 (0.86-2.39)      | 0.17       | 0.54       | 2.66 (0.85-8.28)             | 1.43 (0.56-3.68) | 1.32 (0.52-3.32) | 0.92 (0.29-2.90) | 0.63                | 0.91            |       |  |            |            |
|            |              |            | Female | 0.18 | 403 | 1.00 (0.58-1.72)      | 1.00       | 1.00       | 0.97 (0.31-3.06)             | 0.86 (0.35-2.13) | 2.07 (0.55-7.75) | 0.71 (0.21-2.41) | 0.65                | 0.94            |       |  |            |            |
| rs834829   | <i>NR4A2</i> | 2          | Male   | 0.28 | 386 | 1.04 (0.64-1.69)      | 0.88       | 0.94       | 0.55 (0.18-1.68)             | 1.96 (0.78-4.91) | 0.76 (0.31-1.91) | 1.19 (0.42-3.35) | 0.30                | 0.66            |       |  |            |            |
|            |              |            | Female | 0.30 | 403 | 0.97 (0.58-1.60)      | 0.89       | 0.99       | 1.42 (0.50-4.04)             | 1.34 (0.57-3.15) | 0.90 (0.24-3.41) | 0.44 (0.16-1.24) | 0.33                | 0.68            |       |  |            |            |
| rs834830   | <i>NR4A2</i> | 2          | Male   | 0.20 | 386 | 1.06 (0.64-1.75)      | 0.82       | 0.98       | 0.27 (0.07-1.05)             | 2.30 (0.92-5.72) | 0.82 (0.31-2.13) | 1.50 (0.51-4.39) | 0.04                | 0.14            |       |  |            |            |
|            |              |            | Female | 0.22 | 403 | 0.96 (0.57-1.61)      | 0.88       | 1.00       | 1.16 (0.42-3.24)             | 1.28 (0.55-3.01) | 0.90 (0.22-3.76) | 0.54 (0.19-1.56) | 0.62                | 0.94            |       |  |            |            |
| rs2709371  | <i>CREB1</i> | 2          | Male   | 0.21 | 386 | 1.18 (0.78-1.79)      | 0.45       | 0.56       | 0.96 (0.33-2.82)             | 1.32 (0.61-2.84) | 1.38 (0.67-2.84) | 0.92 (0.36-2.35) | 0.88                | 0.88            |       |  |            |            |
|            |              |            | Female | 0.18 | 403 | 1.10 (0.71-1.72)      | 0.67       | 0.96       | 1.29 (0.57-2.93)             | 0.88 (0.40-1.95) | 1.86 (0.66-5.27) | 0.82 (0.30-2.22) | 0.62                | 0.91            |       |  |            |            |
| rs2253206  | <i>CREB1</i> | 2          | Male   | 0.44 | 383 | 0.82 (0.58-1.15)      | 0.24       | 0.66       | 1.30 (0.59-2.88)             | 0.78 (0.42-1.44) | 0.58 (0.30-1.10) | 0.96 (0.45-2.04) | 0.44                | 0.83            |       |  |            |            |
|            |              |            | Female | 0.48 | 400 | 0.95 (0.67-1.35)      | 0.77       | 0.94       | 0.84 (0.42-1.66)             | 1.18 (0.65-2.13) | 0.41 (0.15-1.14) | 1.30 (0.62-2.72) | 0.24                | 0.62            |       |  |            |            |
| rs2551640  | <i>CREB1</i> | 2          | Male   | 0.33 | 386 | 0.72 (0.50-1.04)      | 0.08       | 0.30       | 0.65 (0.27-1.53)             | 0.56 (0.29-1.10) | 0.61 (0.30-1.22) | 1.47 (0.68-3.16) | 0.26                | 0.63            |       |  |            |            |
|            |              |            | Female | 0.36 | 401 | 0.89 (0.61-1.30)      | 0.56       | 0.96       | 0.71 (0.31-1.62)             | 0.99 (0.53-1.84) | 0.42 (0.13-1.35) | 1.29 (0.64-2.58) | 0.35                | 0.76            |       |  |            |            |
| rs2551642  | <i>CREB1</i> | 2          | Male   | 0.20 | 386 | 1.22 (0.74-2.00)      | 0.44       | 0.56       | 1.02 (0.33-3.15)             | 1.36 (0.55-3.40) | 1.88 (0.76-4.66) | 0.61 (0.18-2.06) | 0.50                | 0.83            |       |  |            |            |
|            |              |            | Female | 0.18 | 403 | 1.17 (0.69-1.99)      | 0.55       | 0.96       | 1.61 (0.56-4.64)             | 1.04 (0.42-2.58) | 2.00 (0.55-7.22) | 0.70 (0.23-2.15) | 0.59                | 0.89            |       |  |            |            |
| rs2709402  | <i>CREB1</i> | 2          | Male   | 0.20 | 386 | 1.22 (0.74-2.00)      | 0.44       | 0.56       | 1.02 (0.33-3.15)             | 1.36 (0.55-3.40) | 1.88 (0.76-4.66) | 0.61 (0.18-2.06) | 0.50                | 0.83            |       |  |            |            |
|            |              |            | Female | 0.18 | 402 | 1.18 (0.69-2.00)      | 0.54       | 0.95       | 1.61 (0.56-4.65)             | 1.08 (0.43-2.69) | 1.90 (0.52-6.85) | 0.70 (0.23-2.15) | 0.62                | 0.91            |       |  |            |            |
| rs10932201 | <i>CREB1</i> | 2          | Male   | 0.46 | 386 | 1.15 (0.82-1.61)      | 0.43       | 0.75       | 1.54 (0.68-3.50)             | 1.24 (0.67-2.30) | 1.21 (0.64-2.28) | 0.76 (0.37-1.54) | 0.59                | 0.89            |       |  |            |            |
|            |              |            | Female | 0.46 | 402 | 1.05 (0.73-1.51)      | 0.80       | 0.80       | 1.25 (0.58-2.72)             | 1.09 (0.60-2.00) | 1.13 (0.43-2.94) | 0.83 (0.41-1.68) | 0.88                | 0.88            |       |  |            |            |
| rs11904814 | <i>CREB1</i> | 2          | Male   | 0.29 | 386 | 0.78 (0.53-1.15)      | 0.20       | 0.60       | 0.66 (0.26-1.66)             | 0.57 (0.27-1.23) | 0.59 (0.29-1.22) | 1.92 (0.86-4.29) | 0.11                | 0.35            |       |  |            |            |
|            |              |            | Female | 0.32 | 402 | 0.86 (0.59-1.27)      | 0.45       | 0.92       | 0.56 (0.23-1.34)             | 1.09 (0.58-2.06) | 0.49 (0.15-1.61) | 1.09 (0.55-2.17) | 0.40                | 0.81            |       |  |            |            |
| rs16839883 | <i>CREB1</i> | 2          | Male   | 0.02 | NA  | NA                    | NA         | NA         | NA                           | NA               | NA               | NA               | NA                  | NA              |       |  |            |            |
|            |              |            | Female | 0.01 | NA  | NA                    | NA         | NA         | NA                           | NA               | NA               | NA               | NA                  | NA              |       |  |            |            |
| rs2551921  | <i>CREB1</i> | 2          | Male   | 0.20 | 386 | 1.22 (0.74-2.00)      | 0.44       | 0.56       | 1.02 (0.33-3.15)             | 1.36 (0.55-3.40) | 1.88 (0.76-4.66) | 0.61 (0.18-2.06) | 0.50                | 0.83            |       |  |            |            |
|            |              |            | Female | 0.18 | 403 | 1.16 (0.69-1.97)      | 0.58       | 0.96       | 1.61 (0.56-4.64)             | 1.04 (0.42-2.57) | 1.90 (0.52-6.84) | 0.70 (0.23-2.15) | 0.61                | 0.90            |       |  |            |            |
| rs2551923  | <i>CREB1</i> | 2          | Male   | 0.20 | 384 | 1.24 (0.75-2.03)      | 0.41       | 0.72       | 1.05 (0.34-3.26)             | 1.36 (0.55-3.40) | 1.87 (0.76-4.64) | 0.63 (0.19-2.15) | 0.54                | 0.86            |       |  |            |            |
|            |              |            | Female | 0.18 | 402 | 1.18 (0.69-2.00)      | 0.54       | 0.95       | 1.61 (0.56-4.65)             | 1.08 (0.43-2.69) | 1.90 (0.52-6.85) | 0.70 (0.23-2.15) | 0.62                | 0.91            |       |  |            |            |
| rs7369949  | <i>CREB1</i> | 2          | Male   | 0.34 | 386 | 0.74 (0.51-1.06)      | 0.09       | 0.35       | 0.65 (0.27-1.53)             | 0.60 (0.31-1.18) | 0.61 (0.30-1.22) | 1.44 (0.66-3.11) | 0.31                | 0.71            |       |  |            |            |
|            |              |            | Female | 0.36 | 403 | 0.90 (0.62-1.31)      | 0.58       | 0.96       | 0.70 (0.31-1.58)             | 0.99 (0.53-1.85) | 0.44 (0.13-1.45) | 1.29 (0.64-2.58) | 0.38                | 0.80            |       |  |            |            |
| rs13397461 | <i>CREB1</i> | 2          | Male   | 0.00 | NA  | NA                    | NA         | NA         | NA                           | NA               | NA               | NA               | NA                  | NA              |       |  |            |            |
|            |              |            | Female | 0.00 | NA  | NA                    | NA         | NA         | NA                           | NA               | NA               | NA               | NA                  | NA              |       |  |            |            |
| rs2551928  | <i>CREB1</i> | 2          | Male   | 0.21 | 386 | 1.15 (0.70-1.90)      | 0.57       | 0.57       | 0.95 (0.31-2.93)             | 1.19 (0.48-2.96) | 1.88 (0.76-4.66) | 0.61 (0.18-2.06) | 0.50                | 0.83            |       |  |            |            |
|            |              |            | Female | 0.18 | 403 | 1.20 (0.71-2.03)      | 0.49       | 0.93       | 1.61 (0.56-4.64)             | 1.15 (0.47-2.80) | 1.90 (0.52-6.84) | 0.70 (0.23-2.15) | 0.63                | 0.81            |       |  |            |            |
| rs1806584  | <i>CREB1</i> | 2          | Male   | 0.20 | 384 | 1.19 (0.72-1.97)      | 0.49       | 0.54       | 1.02 (0.33-3.17)             | 1.36 (0.54-3.39) | 1.73 (0.69-4.34) | 0.63 (0.19-2.13) | 0.59                | 0.80            |       |  |            |            |
|            |              |            | Female | 0.18 | 403 | 1.18 (0.69-2.00)      | 0.55       | 0.95       | 1.61 (0.56-4.64)             | 1.04 (0.42-2.57) | 2.03 (0.56-7.33) | 0.70 (0.23-2.15) | 0.58                | 0.88            |       |  |            |            |
| rs1045780  | <i>CREB1</i> | 2          | Male   | 0.20 | 386 | 1.22 (0.74-2.00)      | 0.44       | 0.56       | 1.02 (0.33-3.15)             | 1.36 (0.55-3.40) | 1.88 (0.76-4.66) | 0.61 (0.18-2.06) | 0.50                | 0.83            |       |  |            |            |
|            |              |            | Female | 0.18 | 403 | 1.16 (0.69-1.97)      | 0.58       | 0.96       | 1.61 (0.56-4.64)             | 1.04 (0.42-2.57) | 1.90 (0.52-6.84) | 0.70 (0.23-2.15) | 0.61                | 0.90            |       |  |            |            |
| rs2551931  | <i>CREB1</i> | 2          | Male   | 0.20 | 383 | 1.23 (0.75-2.03)      | 0.41       | 0.72       | 1.02 (0.33-3.16)             | 1.31 (0.53-3.28) | 2.04 (0.81-5.14) | 0.61 (0.18-2.06) | 0.45                | 0.78            |       |  |            |            |
|            |              |            | Female | 0.18 | 400 | 1.15 (0.68-1.95)      | 0.61       | 0.96       | 1.55 (0.54-4.48)             | 1.02 (0.41-2.53) | 1.89 (0.52-6.84) | 0.70 (0.23-2.15) | 0.63                | 0.82            |       |  |            |            |
| rs7569963  | <i>CREB1</i> | 2          | Male   | 0.26 | 385 | 0.82 (0.55-1.21)      | 0.31       | 0.72       | 0.69 (0.27-1.73)             | 0.68 (0.32-1.46) | 0.60 (0.28-1.29) | 1.82 (0.79-4.17) | 0.22                | 0.58            |       |  |            |            |
|            |              |            | Female | 0.30 | 402 | 0.82 (0.55-1.22)      | 0.32       | 0.80       | 0.62 (0.26-1.51)             | 1.05 (0.54-2.05) | 0.37 (0.10-1.40) | 0.97 (0.49-1.93) | 0.44                | 0.82            |       |  |            |            |
| rs10934253 | <i>DRD3</i>  | 3          | Male   | 0.02 | NA  | NA                    | NA         | NA         | NA                           | NA               | NA               | NA               | NA                  | NA              |       |  |            |            |
|            |              |            | Female | 0.02 | NA  | NA                    | NA         | NA         | NA                           | NA               | NA               | NA               | NA                  | NA              |       |  |            |            |
| rs1385884  | <i>DRD3</i>  | 3          | Male   | 0.42 | 385 | 0.94 (0.66-1.34)      | 0.74       | 1.00       | 0.52 (0.22-1.21)             | 1.43 (0.73-2.78) | 1.00 (0.52-1.93) | 0.85 (0.41-1.75) | 0.30                | 0.79            |       |  |            |            |
|            |              |            | Female | 0.43 | 403 | 0.74 (0.51-1.08)      | 0.11       | 0.61       | 0.96 (0.46-2.00)             | 0.78 (0.41-1.47) | 0.72 (0.29-1.81) | 0.53 (0.24-1.17) | 0.75                | 0.99            |       |  |            |            |
| rs2087017  | <i>DRD3</i>  | 3          | Male   | 0.43 | 386 | 0.94 (0.66-1.33)      | 0.71       | 1.00       | 0.51 (0.22-1.18)             | 1.43 (0.73-2.78) | 1.00 (0.52-1.93) | 0.85 (0.41-1.75) | 0.28                | 0.77            |       |  |            |            |
|            |              |            | Female | 0.43 | 403 | 0.74 (0.51-1.08)      | 0.11       | 0.61       | 0.96 (0.46-2.00)             | 0.78 (0.41-1.47) | 0.72 (0.29-1.81) | 0.53 (0.24-1.17) | 0.75                | 0.99            |       |  |            |            |
| rs2399496  | <i>DRD3</i>  | 3          | Male   | 0.48 | 385 | 0.95 (0.66-1.61)      | 0.84       | 1.00       | 0.31 (0.10-0.99)             | 2.05 (0.67-6.22) | 1.05 (0.40-2.75) | 0.91 (0.30-2.77) | 0.14                | 0.59            |       |  |            |            |
|            |              |            | Female | 0.47 | 403 | 0.71 (0.41-1.22)      | 0.22       | 0.79       | 1.11 (0.33-3.75)             | 0.94 (0.38-2.35) | 0.90 (0.21-3.79) | 0.31 (0.11-0.86) | 0.31                | 0.84            |       |  |            |            |
| rs2134655  | <i>DRD3</i>  | 3          | Male   | 0.27 | 386 | 1.03 (0.70-1.52)      | 0.87       | 1.00       | 0.91 (0.35-2.39)             | 0.96 (0.46-2.01) | 1.03 (0.54-1.95) | 1.27 (0.55-2.93) | 0.95                | 0.95            |       |  |            |            |
|            |              |            | Female | 0.28 | 403 | 1.02 (0.70-1.50)      | 0.90       | 0.99       | 0.71 (0.28-1.83)             | 0.77 (0.41-1.45) | 1.68 (0.65-4.36) | 1.43 (0.71-2.88) | 0.35                | 0.89            |       |  |            |            |
| rs963468   | <i>DRD3</i>  | 3          | Male   | 0.39 | 386 | 0.84 (0.51-1.39)      | 0.50       | 0.99       | 0.22 (0.07-0.71)             | 1.78 (0.62-5.07) | 0.92 (0.37-2.31) | 1.09 (0.38-3.14) | 0.05                | 0.26            |       |  |            |            |
|            |              |            | Female | 0.38 | 403 | 0.69 (0.41-1.16)      | 0.16       | 0.71       | 1.00 (0.34-2.98)             | 0.88 (0.37-2.09) | 0.64 (0.18-2.34) | 0.38 (0.14-1.03) | 0.54                | 0.94            |       |  |            |            |
| rs324035   | <i>DRD3</i>  | 3          | Male   | 0.19 | 386 | 0.90 (0.53-1.51)      | 0.68       | 1.00       | 1.24 (0.41-3.74)             | 0.74 (0.28-1.95) | 1.06 (0.39-2.90) | 0.70 (0.24-2.07) | 0.85                | 0.99            |       |  |            |            |
|            |              |            | Female | 0.20 | 403 | 1.50 (0.90-2.50)      | 0.12       | 0.61       | 2.06 (0.73-5.78)             | 1.35 (0.58-3.15) | 0.79 (0.19-3.29) | 1.86 (0.68-5.13) | 0.70                | 0.98            |       |  |            |            |
| rs3773679  | <i>DRD3</i>  | 3          | Male   | 0.39 | 385 | 0.89 (0.54-1.46)      | 0.64       | 1.00       | 0.22 (0.07-0.71)             | 1.88 (0.66-5.36) | 0.94 (0.37-2.35) | 1.23 (0.43-3.56) | 0.04                | 0.21            |       |  |            |            |
|            |              |            | Female | 0.38 | 403 | 0.71 (0.42-1.18)      | 0.19       | 0.76       | 1.00 (0.34-2.98)             | 0.89 (0.38-2.10) | 0.64 (0.18-2.34) | 0.41 (0.15-1.12) | 0.61                | 0.96            |       |  |            |            |
| rs3773678  | <i>DRD3</i>  | 3          | Male   | 0.14 | 386 | 1.05 (0.65-1.68)      | 0.84       | 1.00       | 1.37 (0.56-3.36)             | 0.91 (0.31-2.69) | 0.90 (0.34-2.41) | 1.03 (0.44-2.42) | 0.92                | 0.99            |       |  |            |            |
|            |              |            | Female | 0.15 | 403 | 1.29 (0.82-2.04)      | 0.28       | 0.74       | 1.56 (0.55-4.43)             | 1.57 (0.82-3.01) | 0.34 (0.05-2.54) | 1.31 (0.47-3.68) | 0.38                | 0.88            |       |  |            |            |
| rs2630349  | <i>DRD3</i>  | 3          | Male   | 0.06 | 386 | 1.02 (0.51-2.05)      | 0.95       | 0.95       | 0.89 (0.20-4.02)             | 0.80 (0.15-4.20) | 0.37 (0.05-2.65) | 2.49 (0.77-8.04) | 0.29                | 0.78            |       |  |            |            |
|            |              |            | Female | 0.07 | 4   |                       |            |            |                              |                  |                  |                  |                     |                 |       |  |            |            |

| SNP        | Gene Region | Chromosome | Gender | MAF  | N   | Marginal Effect       |            |         | Treatment Stratified Effects |                   |                  |                   | Test of Interaction |            |            |
|------------|-------------|------------|--------|------|-----|-----------------------|------------|---------|------------------------------|-------------------|------------------|-------------------|---------------------|------------|------------|
|            |             |            |        |      |     | Likelihood ratio test |            | Placebo | Bupropion                    | Patch             | Spray            | Observed P        | Adjusted P          | Observed P | Adjusted P |
|            |             |            |        |      |     | SNP OR (95% CI)       | Observed P |         |                              |                   |                  |                   |                     |            |            |
| rs1865149  | NCK1        | 3          | Male   | 0.32 | 386 | 0.88 (0.60-1.29)      | 0.51       | 0.83    | 0.91 (0.42-2.00)             | 0.56 (0.27-1.20)  | 1.17 (0.56-2.42) | 1.03 (0.48-2.21)  | 0.55                | 0.90       |            |
|            |             |            | Female | 0.28 | 403 | 1.23 (0.83-1.84)      | 0.31       | 0.83    | 0.72 (0.30-1.73)             | 1.28 (0.64-2.58)  | 1.02 (0.33-3.12) | 1.91 (0.92-3.94)  | 0.38                | 0.81       |            |
| rs2343662  | NCK1        | 3          | Male   | 0.32 | 386 | 0.88 (0.60-1.29)      | 0.51       | 0.83    | 0.91 (0.42-2.00)             | 0.56 (0.27-1.20)  | 1.17 (0.56-2.42) | 1.03 (0.48-2.21)  | 0.55                | 0.90       |            |
|            |             |            | Female | 0.28 | 403 | 1.22 (0.82-1.83)      | 0.33       | 0.85    | 0.72 (0.30-1.73)             | 1.25 (0.62-2.53)  | 1.02 (0.33-3.12) | 1.91 (0.92-3.94)  | 0.39                | 0.81       |            |
| rs9846691  | NCK1        | 3          | Male   | 0.32 | 386 | 0.88 (0.60-1.29)      | 0.51       | 0.83    | 0.91 (0.42-2.00)             | 0.56 (0.27-1.20)  | 1.17 (0.56-2.42) | 1.03 (0.48-2.21)  | 0.55                | 0.90       |            |
|            |             |            | Female | 0.28 | 403 | 1.23 (0.83-1.84)      | 0.31       | 0.83    | 0.72 (0.30-1.73)             | 1.28 (0.64-2.58)  | 1.02 (0.33-3.12) | 1.91 (0.92-3.94)  | 0.38                | 0.81       |            |
| rs6784005  | NCK1        | 3          | Male   | 0.32 | 349 | 0.81 (0.54-1.22)      | 0.31       | 0.73    | 0.91 (0.38-2.20)             | 0.56 (0.25-1.24)  | 0.89 (0.40-1.95) | 0.99 (0.45-2.20)  | 0.75                | 0.96       |            |
|            |             |            | Female | 0.29 | 363 | 1.26 (0.83-1.91)      | 0.28       | 0.81    | 0.69 (0.28-1.68)             | 1.47 (0.70-3.10)  | 0.96 (0.31-2.94) | 1.91 (0.90-4.03)  | 0.32                | 0.75       |            |
| rs9824147  | NCK1        | 3          | Male   | 0.04 | NA  | NA                    | NA         | NA      | NA                           | NA                | NA               | NA                | NA                  | NA         |            |
|            |             |            | Female | 0.02 | NA  | NA                    | NA         | NA      | NA                           | NA                | NA               | NA                | NA                  | NA         |            |
| rs9867325  | NCK1        | 3          | Male   | 0.20 | 385 | 0.85 (0.55-1.31)      | 0.46       | 0.86    | 0.35 (0.09-1.28)             | 0.83 (0.38-1.83)  | 0.87 (0.40-1.88) | 1.55 (0.63-3.83)  | 0.29                | 0.71       |            |
|            |             |            | Female | 0.27 | 402 | 1.17 (0.79-1.74)      | 0.44       | 0.68    | 1.25 (0.58-2.69)             | 1.43 (0.74-2.78)  | 0.77 (0.24-2.47) | 1.02 (0.47-2.21)  | 0.80                | 0.80       |            |
| rs6761993  | NCK1        | 3          | Male   | 0.39 | 384 | 0.81 (0.56-1.17)      | 0.25       | 0.66    | 0.70 (0.33-1.51)             | 0.50 (0.24-1.01)  | 1.08 (0.51-2.29) | 1.25 (0.59-2.62)  | 0.27                | 0.70       |            |
|            |             |            | Female | 0.38 | 401 | 1.25 (0.86-1.82)      | 0.24       | 0.77    | 0.92 (0.43-1.96)             | 1.52 (0.79-2.95)  | 0.70 (0.23-2.13) | 1.64 (0.82-3.28)  | 0.45                | 0.80       |            |
| rs9837990  | NCK1        | 3          | Male   | 0.39 | 386 | 0.66 (0.40-1.08)      | 0.10       | 0.36    | 0.68 (0.22-2.05)             | 0.35 (0.14-0.90)  | 0.85 (0.34-2.10) | 1.01 (0.35-2.92)  | 0.45                | 0.82       |            |
|            |             |            | Female | 0.38 | 403 | 1.29 (0.76-2.22)      | 0.34       | 0.86    | 1.17 (0.41-3.32)             | 1.35 (0.53-3.40)  | 0.55 (0.15-1.99) | 2.52 (0.77-8.30)  | 0.39                | 0.82       |            |
| rs9881139  | NCK1        | 3          | Male   | 0.39 | 386 | 0.80 (0.56-1.16)      | 0.24       | 0.66    | 0.70 (0.32-1.51)             | 0.50 (0.24-1.01)  | 1.08 (0.51-2.29) | 1.20 (0.58-2.51)  | 0.29                | 0.73       |            |
|            |             |            | Female | 0.38 | 403 | 1.25 (0.86-1.81)      | 0.25       | 0.78    | 0.91 (0.42-1.94)             | 1.52 (0.79-2.95)  | 0.70 (0.23-2.13) | 1.64 (0.82-3.28)  | 0.44                | 0.79       |            |
| rs4678274  | NCK1        | 3          | Male   | 0.32 | 386 | 0.88 (0.60-1.29)      | 0.51       | 0.83    | 0.91 (0.42-2.00)             | 0.56 (0.27-1.20)  | 1.17 (0.56-2.42) | 1.03 (0.48-2.21)  | 0.55                | 0.90       |            |
|            |             |            | Female | 0.28 | 403 | 1.23 (0.83-1.84)      | 0.31       | 0.83    | 0.72 (0.30-1.73)             | 1.28 (0.64-2.58)  | 1.02 (0.33-3.12) | 1.91 (0.92-3.94)  | 0.38                | 0.81       |            |
| rs10935210 | NCK1        | 3          | Male   | 0.32 | 386 | 0.88 (0.60-1.29)      | 0.51       | 0.83    | 0.91 (0.42-2.00)             | 0.56 (0.27-1.20)  | 1.17 (0.56-2.42) | 1.03 (0.48-2.21)  | 0.55                | 0.90       |            |
|            |             |            | Female | 0.28 | 402 | 1.24 (0.83-1.85)      | 0.30       | 0.82    | 0.72 (0.30-1.73)             | 1.30 (0.64-2.61)  | 1.02 (0.33-3.12) | 1.91 (0.92-3.94)  | 0.38                | 0.81       |            |
| rs6775389  | NCK1        | 3          | Male   | 0.32 | 386 | 0.88 (0.60-1.29)      | 0.51       | 0.83    | 0.91 (0.42-2.00)             | 0.56 (0.27-1.20)  | 1.17 (0.56-2.42) | 1.03 (0.48-2.21)  | 0.55                | 0.90       |            |
|            |             |            | Female | 0.28 | 403 | 1.23 (0.82-1.83)      | 0.32       | 0.85    | 0.72 (0.30-1.73)             | 1.28 (0.64-2.58)  | 0.97 (0.32-2.99) | 1.91 (0.92-3.94)  | 0.38                | 0.80       |            |
| rs1433318  | NCK1        | 3          | Male   | 0.32 | 385 | 0.87 (0.60-1.28)      | 0.48       | 0.80    | 0.92 (0.42-2.01)             | 0.57 (0.27-1.20)  | 1.17 (0.56-2.43) | 0.98 (0.45-2.16)  | 0.57                | 0.92       |            |
|            |             |            | Female | 0.28 | 402 | 1.24 (0.83-1.85)      | 0.30       | 0.82    | 0.72 (0.30-1.73)             | 1.30 (0.64-2.61)  | 1.02 (0.33-3.12) | 1.91 (0.92-3.94)  | 0.38                | 0.81       |            |
| rs835648   | NCK1        | 3          | Male   | 0.32 | 386 | 0.85 (0.58-1.25)      | 0.41       | 0.82    | 0.90 (0.39-2.05)             | 0.58 (0.27-1.24)  | 1.13 (0.55-2.36) | 0.90 (0.42-1.96)  | 0.65                | 0.96       |            |
|            |             |            | Female | 0.27 | 403 | 1.29 (0.87-1.91)      | 0.22       | 0.73    | 0.76 (0.32-1.79)             | 1.30 (0.66-2.56)  | 1.11 (0.37-3.35) | 2.01 (0.98-4.13)  | 0.37                | 0.81       |            |
| rs7648198  | NCK1        | 3          | Male   | 0.45 | 386 | 0.78 (0.46-1.31)      | 0.35       | 0.77    | 0.66 (0.21-2.06)             | 0.50 (0.19-1.32)  | 1.30 (0.50-3.38) | 0.78 (0.24-2.52)  | 0.58                | 0.92       |            |
|            |             |            | Female | 0.45 | 402 | 1.26 (0.71-2.24)      | 0.42       | 0.73    | 2.18 (0.58-8.20)             | 1.10 (0.41-2.94)  | 0.43 (0.12-1.57) | 2.04 (0.62-6.77)  | 0.26                | 0.67       |            |
| rs835637   | NCK1        | 3          | Male   | 0.47 | 386 | 1.65 (0.92-2.95)      | 0.09       | 0.38    | 4.17 (0.87-19.92)            | 2.48 (0.83-7.38)  | 1.24 (0.41-3.76) | 0.65 (0.21-2.01)  | 0.18                | 0.55       |            |
|            |             |            | Female | 0.45 | 402 | 0.77 (0.45-1.32)      | 0.35       | 0.84    | 2.11 (0.56-7.94)             | 0.48 (0.20-1.19)  | 1.75 (0.35-8.86) | 0.46 (0.17-1.26)  | 0.13                | 0.40       |            |
| rs835636   | NCK1        | 3          | Male   | 0.48 | 386 | 0.72 (0.42-1.23)      | 0.22       | 0.66    | 0.85 (0.26-2.78)             | 0.50 (0.18-1.36)  | 0.78 (0.30-2.02) | 0.91 (0.26-3.21)  | 0.86                | 0.86       |            |
|            |             |            | Female | 0.49 | 402 | 1.83 (0.95-3.50)      | 0.06       | 0.30    | 3.07 (0.65-13.39)            | 1.40 (0.51-3.89)  | 0.93 (0.22-3.92) | 3.20 (0.68-15.08) | 0.56                | 0.78       |            |
| rs835634   | NCK1        | 3          | Male   | 0.44 | 385 | 1.93 (1.09-3.43)      | 0.02       | 0.12    | 4.43 (0.93-21.13)            | 2.81 (1.00-7.89)  | 1.78 (0.60-5.31) | 0.65 (0.21-1.99)  | 0.16                | 0.50       |            |
|            |             |            | Female | 0.42 | 402 | 0.80 (0.48-1.34)      | 0.39       | 0.81    | 1.39 (0.45-4.30)             | 0.58 (0.25-1.38)  | 1.33 (0.32-5.51) | 0.57 (0.21-1.56)  | 0.48                | 0.76       |            |
| rs12054220 | NCK1        | 3          | Male   | 0.46 | 386 | 0.86 (0.51-1.46)      | 0.59       | 0.82    | 0.64 (0.21-2.00)             | 0.98 (0.35-2.75)  | 1.13 (0.43-2.96) | 0.68 (0.22-2.07)  | 0.85                | 0.95       |            |
|            |             |            | Female | 0.47 | 403 | 1.40 (0.78-2.51)      | 0.26       | 0.78    | 1.65 (0.50-5.51)             | 2.49 (0.78-7.92)  | 0.37 (0.10-1.36) | 1.54 (0.50-4.72)  | 0.18                | 0.52       |            |
| rs7655090  | DRD5        | 4          | Male   | 0.31 | 386 | 1.13 (0.78-1.64)      | 0.53       | 0.87    | 0.79 (0.37-1.70)             | 1.30 (0.57-2.95)  | 1.50 (0.79-2.85) | 0.93 (0.39-2.21)  | 0.59                | 0.91       |            |
|            |             |            | Female | 0.33 | 403 | 1.09 (0.75-1.58)      | 0.65       | 0.92    | 1.64 (0.78-3.42)             | 1.35 (0.73-2.51)  | 1.11 (0.38-3.23) | 0.54 (0.25-1.20)  | 0.17                | 0.22       |            |
| rs10939514 | DRD5        | 4          | Male   | 0.05 | NA  | NA                    | NA         | NA      | NA                           | NA                | NA               | NA                | NA                  | NA         |            |
|            |             |            | Female | 0.04 | NA  | NA                    | NA         | NA      | NA                           | NA                | NA               | NA                | NA                  | NA         |            |
| rs10939515 | DRD5        | 4          | Male   | 0.16 | 385 | 1.10 (0.65-1.86)      | 0.72       | 0.97    | 0.88 (0.27-2.85)             | 1.49 (0.58-3.84)  | 1.05 (0.40-2.76) | 0.92 (0.27-3.15)  | 0.89                | 0.89       |            |
|            |             |            | Female | 0.18 | 403 | 1.00 (0.58-1.72)      | 0.99       | 0.99    | 2.67 (0.93-7.69)             | 1.16 (0.49-2.77)  | 0.77 (0.19-3.20) | 0.23 (0.05-1.09)  | 0.04                | 0.10       |            |
| rs10033951 | DRD5        | 4          | Male   | 0.30 | 381 | 1.11 (0.76-1.62)      | 0.60       | 0.92    | 0.81 (0.37-1.75)             | 1.34 (0.59-3.03)  | 1.38 (0.71-2.67) | 0.93 (0.38-2.30)  | 0.70                | 0.94       |            |
|            |             |            | Female | 0.32 | 395 | 1.10 (0.76-1.60)      | 0.60       | 0.91    | 1.49 (0.72-3.08)             | 1.42 (0.76-2.64)  | 1.11 (0.38-3.24) | 0.56 (0.25-1.26)  | 0.23                | 0.28       |            |
| rs2867383  | DRD5        | 4          | Male   | 0.31 | 385 | 1.07 (0.73-1.57)      | 0.73       | 0.83    | 0.77 (0.35-1.68)             | 1.21 (0.53-2.73)  | 1.40 (0.71-2.76) | 0.92 (0.38-2.19)  | 0.67                | 0.95       |            |
|            |             |            | Female | 0.33 | 403 | 1.10 (0.76-1.59)      | 0.61       | 0.90    | 1.44 (0.69-3.01)             | 1.39 (0.75-2.57)  | 1.03 (0.36-2.93) | 0.64 (0.29-1.37)  | 0.36                | 0.36       |            |
| rs1850744  | DRD5        | 4          | Male   | 0.05 | NA  | NA                    | NA         | NA      | NA                           | NA                | NA               | NA                | NA                  | NA         |            |
|            |             |            | Female | 0.04 | NA  | NA                    | NA         | NA      | NA                           | NA                | NA               | NA                | NA                  | NA         |            |
| rs13106539 | DRD5        | 4          | Male   | 0.38 | 386 | 1.09 (0.66-1.82)      | 0.73       | 0.92    | 0.85 (0.28-2.58)             | 0.97 (0.39-2.39)  | 1.07 (0.41-2.82) | 1.73 (0.55-5.48)  | 0.82                | 0.94       |            |
|            |             |            | Female | 0.38 | 403 | 0.92 (0.55-1.53)      | 0.73       | 0.92    | 0.88 (0.32-2.47)             | 1.96 (0.75-5.11)  | 0.97 (0.26-3.66) | 0.36 (0.13-1.01)  | 0.12                | 0.22       |            |
| rs1519097  | DRD5        | 4          | Male   | 0.32 | 382 | 1.01 (0.68-1.49)      | 0.97       | 0.97    | 0.51 (0.20-1.29)             | 1.31 (0.59-2.93)  | 1.39 (0.72-2.71) | 0.86 (0.35-2.10)  | 0.28                | 0.57       |            |
|            |             |            | Female | 0.34 | 402 | 1.15 (0.79-1.66)      | 0.47       | 0.81    | 1.30 (0.62-2.75)             | 1.65 (0.89-3.06)  | 0.90 (0.31-2.64) | 0.68 (0.32-1.45)  | 0.32                | 0.37       |            |
| rs356219   | SNCA        | 4          | Male   | 0.36 | 386 | 0.91 (0.63-1.31)      | 0.61       | 1.00    | 0.47 (0.19-1.21)             | 1.51 (0.75-3.01)  | 1.24 (0.63-2.45) | 0.54 (0.25-1.19)  | 0.08                | 0.40       |            |
|            |             |            | Female | 0.39 | 403 | 1.10 (0.76-1.60)      | 0.60       | 0.99    | 0.55 (0.24-1.30)             | 1.13 (0.61-2.08)  | 2.35 (0.82-6.74) | 1.25 (0.62-2.50)  | 0.18                | 0.63       |            |
| rs11931074 | SNCA        | 4          | Male   | 0.08 | 386 | 0.87 (0.43-1.73)      | 0.68       | 1.00    | 0.73 (0.15-3.67)             | 1.86 (0.54-6.38)  | 0.63 (0.16-2.39) | 0.55 (0.11-2.71)  | 0.57                | 0.94       |            |
|            |             |            | Female | 0.08 | 403 | 1.17 (0.58-2.37)      | 0.66       | 1.00    | 0.40 (0.08-1.29)             | 3.60 (1.06-12.25) | 0.55 (0.06-4.83) | 1.44 (0.34-6.10)  | 0.11                | 0.47       |            |
| rs356220   | SNCA        | 4          | Male   | 0.35 | 343 | 0.87 (0.59-1.29)      | 0.49       | 1.00    | 0.45 (0.16-1.26)             | 1.35 (0.65-2.80)  | 1.18 (0.58-2.43) | 0.56 (0.25-1.27)  | 0.18                | 0.64       |            |
|            |             |            | Female | 0.37 | 348 | 1.27 (0.86-1.87)      | 0.23       | 0.90    | 0.68 (0.28-1.64)             | 1.42 (0.73-2.77)  | 2.17 (0.74-6.38) | 1.32 (0.67-2.63)  | 0.38                | 0.89       |            |
| rs10003708 | SNCA        | 4          | Male   | 0.08 | 386 | 0.87 (0.43-1.73)      | 0.68       | 1.00    | 0.73 (0.15-3.67)             | 1.86 (0.54-6.38)  | 0.63 (0.16-2.39) | 0.55 (0.11-2.71)  | 0.57                | 0.94       |            |
|            |             |            | Female | 0.08 | 403 | 1.17 (0.58-2.37)      | 0.66       | 1.00    | 0.40 (0.08-1.29)             | 3.60 (1.06-12.25) | 0.55 (0.06-4.83) | 1.44 (0.34-6.10)  | 0.11                | 0.47       |            |
| rs168552   | SNCA        | 4          | Male   | 0.29 | 386 | 0.94 (0.64-1.39)      | 0.76       | 1.00    | 0.41 (0.14-1.21)             | 1.32 (0.62-2.84)  | 1.38 (0.70-2.73) | 0.66 (0.29-1.51)  | 0.15                | 0.60       |            |
|            |             |            | Female | 0.31 | 402 | 1.07 (0.73-1.58)      | 0.72       | 0.99    | 0.94 (0.39-2.27)             | 0.82 (0.43-1.55)  | 2.52 (0.94-6.75) | 1.05 (0.50-2.21)  | 0.28                | 0.81       |            |
| rs3857051  | SNCA        |            |        |      |     |                       |            |         |                              |                   |                  |                   |                     |            |            |

| SNP        | Gene Region | Chromosome | Gender   | MAF  | N   | Marginal Effect       |            |            | Treatment Stratified Effects |                   |                   |                   | Test of Interaction |            |            |            |            |         |
|------------|-------------|------------|----------|------|-----|-----------------------|------------|------------|------------------------------|-------------------|-------------------|-------------------|---------------------|------------|------------|------------|------------|---------|
|            |             |            |          |      |     | Likelihood ratio test |            |            | SNP OR (95% CI)              | SNP OR (95% CI)   | SNP OR (95% CI)   | SNP OR (95% CI)   | SNP OR (95% CI)     | Observed P | Adjusted P | Observed P | Adjusted P |         |
|            |             |            |          |      |     | SNP OR (95% CI)       | Observed P | Adjusted P |                              |                   |                   |                   |                     |            |            |            |            | Placebo |
| rs961386   | SNCA        | 4          | Female   | 0.01 | NA  | NA                    | NA         | NA         | NA                           | NA                | NA                | NA                | NA                  | NA         | NA         | NA         | NA         | NA      |
| rs3822095  | SNCA        | 4          | Female   | 0.37 | 386 | 1.05 (0.73-1.51)      | 0.80       | 1.00       | 1.22 (0.50-2.97)             | 0.70 (0.36-1.35)  | 1.26 (0.63-2.52)  | 1.28 (0.61-2.67)  | 0.54                | 0.95       | 0.54       | 0.95       | 0.54       | 0.95    |
| rs2619372  | SNCA        | 4          | Female   | 0.38 | 403 | 0.95 (0.65-1.37)      | 0.77       | 0.98       | 0.79 (0.35-1.78)             | 0.99 (0.54-1.84)  | 0.82 (0.30-2.25)  | 1.09 (0.55-2.17)  | 0.93                | 0.93       | 0.93       | 0.93       | 0.93       | 0.93    |
| rs1812923  | SNCA        | 4          | Female   | 0.26 | 403 | 1.12 (0.76-1.65)      | 0.57       | 1.00       | 1.02 (0.43-2.40)             | 0.87 (0.45-1.67)  | 0.75 (0.34-1.65)  | 1.17 (0.53-2.61)  | 0.88                | 0.98       | 0.88       | 0.98       | 0.88       | 0.98    |
| rs2737020  | SNCA        | 4          | Female   | 0.43 | 386 | 0.94 (0.66-1.59)      | 0.82       | 1.00       | 1.83 (0.77-4.33)             | 1.18 (0.65-2.16)  | 0.69 (0.23-2.04)  | 0.89 (0.39-2.04)  | 0.50                | 0.94       | 0.50       | 0.94       | 0.50       | 0.94    |
| rs7356228  | SNCA        | 4          | Female   | 0.45 | 403 | 1.17 (0.67-2.03)      | 0.58       | 0.99       | 0.92 (0.28-2.99)             | 0.72 (0.26-1.96)  | 1.12 (0.42-2.96)  | 1.05 (0.35-3.13)  | 0.93                | 0.93       | 0.93       | 0.93       | 0.93       | 0.93    |
| rs2737015  | SNCA        | 4          | Female   | 0.30 | 385 | 0.92 (0.63-1.35)      | 0.67       | 1.00       | 0.53 (0.18-1.53)             | 1.27 (0.52-3.14)  | 1.02 (0.24-4.29)  | 2.77 (0.74-10.38) | 0.26                | 0.78       | 0.26       | 0.78       | 0.26       | 0.78    |
| rs3113355  | SNCA        | 4          | Female   | 0.37 | 386 | 1.05 (0.73-1.51)      | 0.80       | 1.00       | 1.22 (0.50-2.97)             | 0.70 (0.36-1.35)  | 1.26 (0.63-2.52)  | 1.28 (0.61-2.67)  | 0.54                | 0.95       | 0.54       | 0.95       | 0.54       | 0.95    |
| rs6532191  | SNCA        | 4          | Female   | 0.39 | 402 | 0.94 (0.65-1.37)      | 0.75       | 0.99       | 0.77 (0.34-1.75)             | 0.99 (0.54-1.84)  | 0.82 (0.30-2.24)  | 1.09 (0.55-2.17)  | 0.92                | 0.93       | 0.92       | 0.93       | 0.92       | 0.93    |
| rs2583975  | SNCA        | 4          | Female   | 0.26 | 385 | 1.01 (0.62-1.65)      | 0.96       | 0.99       | 0.42 (0.12-1.43)             | 1.36 (0.55-3.34)  | 1.60 (0.64-3.97)  | 0.77 (0.27-2.16)  | 0.28                | 0.76       | 0.28       | 0.76       | 0.28       | 0.76    |
| rs13148411 | SNCA        | 4          | Female   | 0.23 | 385 | 0.96 (0.58-1.57)      | 0.86       | 0.86       | 0.96 (0.35-2.65)             | 0.70 (0.30-1.63)  | 3.52 (0.86-14.48) | 0.70 (0.26-1.88)  | 0.21                | 0.69       | 0.21       | 0.69       | 0.21       | 0.69    |
| rs5832191  | SNCA        | 4          | Female   | 0.21 | 403 | 1.36 (0.82-2.27)      | 0.24       | 0.90       | 0.98 (0.33-2.91)             | 0.93 (0.37-2.36)  | 0.75 (0.29-1.95)  | 1.84 (0.64-5.30)  | 0.65                | 0.95       | 0.65       | 0.95       | 0.65       | 0.95    |
| rs2583975  | SNCA        | 4          | Female   | 0.22 | 385 | 0.96 (0.64-1.45)      | 0.85       | 1.00       | 2.37 (0.84-7.60)             | 1.13 (0.48-2.65)  | 1.27 (0.35-4.68)  | 1.08 (0.38-3.06)  | 0.69                | 0.94       | 0.69       | 0.94       | 0.69       | 0.94    |
| rs13148411 | SNCA        | 4          | Female   | 0.22 | 385 | 0.94 (0.67-1.33)      | 0.72       | 1.00       | 0.71 (0.30-1.70)             | 1.13 (0.58-2.18)  | 0.85 (0.46-1.59)  | 1.03 (0.52-2.02)  | 0.84                | 0.99       | 0.84       | 0.99       | 0.84       | 0.99    |
| rs10011157 | SNCA        | 4          | Female   | 0.20 | 403 | 1.30 (0.87-1.95)      | 0.21       | 0.87       | 1.76 (0.84-3.67)             | 0.82 (0.45-1.48)  | 1.62 (0.64-4.11)  | 0.88 (0.43-1.82)  | 0.31                | 0.82       | 0.31       | 0.82       | 0.31       | 0.82    |
| rs2583981  | SNCA        | 4          | Female   | 0.27 | 386 | 1.01 (0.62-1.65)      | 0.96       | 0.99       | 0.88 (0.33-2.40)             | 0.76 (0.36-1.60)  | 0.77 (0.33-1.82)  | 1.72 (0.77-3.83)  | 0.46                | 0.93       | 0.46       | 0.93       | 0.46       | 0.93    |
| rs2301134  | SNCA        | 4          | Female   | 0.30 | 403 | 0.96 (0.58-1.57)      | 0.86       | 0.86       | 2.59 (1.08-6.22)             | 1.12 (0.60-2.10)  | 0.79 (0.25-2.52)  | 1.20 (0.49-2.94)  | 0.34                | 0.85       | 0.34       | 0.85       | 0.34       | 0.85    |
| rs3775085  | TDO2        | 4          | Female   | 0.20 | 403 | 1.30 (0.87-1.95)      | 0.21       | 0.87       | 0.87 (0.33-2.61)             | 0.83 (0.40-1.71)  | 0.66 (0.28-1.57)  | 1.72 (0.77-3.83)  | 0.41                | 0.91       | 0.41       | 0.91       | 0.41       | 0.91    |
| rs7355910  | TDO2        | 4          | Female   | 0.10 | 403 | 1.56 (0.92-2.62)      | 0.10       | 0.43       | 2.14 (0.91-5.01)             | 1.08 (0.58-2.00)  | 1.01 (0.34-2.99)  | 1.16 (0.47-2.83)  | 0.59                | 0.95       | 0.59       | 0.95       | 0.59       | 0.95    |
| rs2271537  | TDO2        | 4          | Female   | 0.48 | 360 | 1.34 (0.91-1.98)      | 0.13       | 0.61       | 0.42 (0.12-1.43)             | 1.36 (0.55-3.34)  | 1.60 (0.64-3.97)  | 0.77 (0.27-2.16)  | 0.29                | 0.78       | 0.29       | 0.78       | 0.29       | 0.78    |
| rs10517626 | TDO2        | 4          | Female   | 0.11 | 386 | 1.40 (0.83-2.36)      | 0.22       | 0.71       | 0.96 (0.35-2.65)             | 0.70 (0.30-1.63)  | 3.52 (0.86-14.48) | 0.70 (0.26-1.88)  | 0.21                | 0.69       | 0.21       | 0.69       | 0.21       | 0.69    |
| rs2878125  | TDO2        | 4          | Female   | 0.12 | 385 | 1.31 (0.79-2.18)      | 0.30       | 0.80       | 0.87 (0.33-2.61)             | 0.83 (0.40-1.71)  | 0.66 (0.28-1.57)  | 1.72 (0.77-3.83)  | 0.41                | 0.91       | 0.41       | 0.91       | 0.41       | 0.91    |
| rs13152449 | TDO2        | 4          | Female   | 0.10 | 403 | 1.38 (0.82-2.34)      | 0.24       | 0.63       | 0.45 (0.10-2.09)             | 2.55 (1.19-5.47)  | 0.27 (0.03-1.24)  | 1.07 (0.40-2.83)  | 0.05                | 0.15       | 0.05       | 0.15       | 0.05       | 0.15    |
| rs11723579 | TDO2        | 4          | Female   | 0.10 | 403 | 1.45 (0.85-2.48)      | 0.19       | 0.59       | 1.82 (0.66-4.98)             | 2.13 (0.75-6.06)  | 1.21 (0.44-3.32)  | 0.72 (0.20-2.64)  | 0.55                | 0.93       | 0.55       | 0.93       | 0.55       | 0.93    |
| rs2292537  | TDO2        | 4          | Female   | 0.47 | 403 | 0.63 (0.37-1.07)      | 0.09       | 0.43       | 0.59 (0.13-2.69)             | 3.87 (1.59-9.43)  | 0.34 (0.04-2.66)  | 1.00 (0.34-2.99)  | 0.02                | 0.10       | 0.02       | 0.10       | 0.02       | 0.10    |
| rs2292536  | TDO2        | 4          | Female   | 0.09 | 403 | 0.94 (0.49-1.82)      | 0.86       | 0.86       | 2.67 (1.00-7.12)             | 1.83 (0.69-4.88)  | 0.89 (0.33-2.43)  | 0.55 (0.15-2.01)  | 0.17                | 0.53       | 0.17       | 0.53       | 0.17       | 0.53    |
| rs6856558  | TDO2        | 4          | Female   | 0.10 | 403 | 1.45 (0.85-2.48)      | 0.19       | 0.59       | 0.45 (0.10-2.09)             | 2.55 (1.19-5.47)  | 0.27 (0.03-1.24)  | 1.07 (0.40-2.83)  | 0.05                | 0.15       | 0.05       | 0.15       | 0.05       | 0.15    |
| rs9044     | TDO2        | 4          | Female   | 0.48 | 360 | 1.08 (0.63-1.84)      | 0.78       | 0.78       | 0.76 (0.23-2.48)             | 0.99 (0.33-2.93)  | 0.39 (0.14-1.10)  | 0.82 (0.23-2.86)  | 0.65                | 0.95       | 0.65       | 0.95       | 0.65       | 0.95    |
| rs6856354  | TDO2        | 4          | Female   | 0.36 | 386 | 0.86 (0.45-1.66)      | 0.65       | 0.87       | 1.04 (0.26-4.16)             | 1.83 (0.71-4.71)  | NA                | 0.39 (0.08-1.85)  | 0.12                | 0.35       | 0.12       | 0.35       | 0.12       | 0.35    |
| rs27074    | SLC6A3      | 5          | Female   | 0.43 | 385 | 1.26 (0.90-1.78)      | 0.18       | 0.70       | 1.82 (0.64-4.98)             | 0.80 (0.42-1.52)  | 1.77 (0.94-3.36)  | 1.01 (0.46-2.22)  | 0.24                | 0.62       | 0.24       | 0.62       | 0.24       | 0.62    |
| rs11133762 | SLC6A3      | 5          | Female   | 0.45 | 402 | 0.89 (0.63-1.25)      | 0.50       | 0.84       | 0.92 (0.47-1.80)             | 1.51 (0.85-2.70)  | 0.27 (0.08-0.88)  | 0.68 (0.34-1.32)  | 0.03                | 0.13       | 0.03       | 0.13       | 0.03       | 0.13    |
| rs10064525 | SLC6A3      | 5          | Female   | 0.36 | 386 | 1.24 (0.87-1.76)      | 0.23       | 0.73       | 0.46 (0.15-1.40)             | 1.14 (0.45-2.87)  | 0.65 (0.27-1.59)  | 1.55 (0.50-4.82)  | 0.38                | 0.80       | 0.38       | 0.80       | 0.38       | 0.80    |
| rs40184    | SLC6A3      | 5          | Female   | 0.46 | 401 | 0.91 (0.65-1.29)      | 0.61       | 0.91       | 0.94 (0.30-2.94)             | 1.99 (0.68-5.78)  | 0.27 (0.07-1.01)  | 0.73 (0.25-2.08)  | 0.13                | 0.35       | 0.13       | 0.35       | 0.13       | 0.35    |
| rs11564767 | SLC6A3      | 5          | Female   | 0.36 | 386 | 0.85 (0.52-1.38)      | 0.51       | 0.94       | 0.46 (0.15-1.40)             | 1.14 (0.45-2.87)  | 0.65 (0.27-1.59)  | 1.55 (0.50-4.82)  | 0.38                | 0.80       | 0.38       | 0.80       | 0.38       | 0.80    |
| rs11564764 | SLC6A3      | 5          | Female   | 0.36 | 402 | 0.56 (0.33-0.93)      | 0.02       | 0.16       | 0.74 (0.19-2.94)             | 0.61 (0.20-1.85)  | 0.92 (0.25-3.33)  | 0.84 (0.16-4.31)  | 0.97                | 0.97       | 0.97       | 0.97       | 0.97       | 0.97    |
| rs376511   | SLC6A3      | 5          | Female   | 0.09 | 386 | 0.74 (0.38-1.43)      | 0.35       | 0.99       | 1.38 (0.44-4.35)             | 0.90 (0.33-2.45)  | 3.53 (0.86-14.41) | 1.09 (0.31-3.77)  | 0.48                | 0.88       | 0.48       | 0.88       | 0.48       | 0.88    |
| rs6347     | SLC6A3      | 5          | Female   | 0.01 | NA  | NA                    | NA         | NA         | 1.07 (0.20-5.74)             | 0.27 (0.03-2.24)  | 0.74 (0.19-2.87)  | 1.38 (0.33-5.73)  | 0.58                | 0.98       | 0.58       | 0.98       | 0.58       | 0.98    |
| rs10040882 | SLC6A3      | 5          | Female   | 0.06 | 382 | 0.78 (0.36-1.69)      | 0.51       | 1.00       | NA                           | 1.04 (0.34-3.17)  | 0.45 (0.05-3.89)  | 2.64 (0.75-9.29)  | 0.08                | 0.40       | 0.08       | 0.40       | 0.08       | 0.40    |
| rs2975292  | SLC6A3      | 5          | Female   | 0.08 | 398 | 0.96 (0.47-1.97)      | 0.91       | 0.99       | 1.23 (0.57-2.69)             | 0.65 (0.35-1.21)  | 0.70 (0.38-1.29)  | 0.66 (0.31-1.42)  | 0.58                | 0.90       | 0.58       | 0.90       | 0.58       | 0.90    |
| rs458334   | SLC6A3      | 5          | Female   | 0.47 | 401 | 1.00 (0.70-1.43)      | 0.98       | 0.98       | 1.82 (0.82-4.02)             | 1.09 (0.61-1.95)  | 1.12 (0.46-2.76)  | 0.52 (0.25-1.07)  | 0.13                | 0.49       | 0.13       | 0.49       | 0.13       | 0.49    |
| rs11564767 | SLC6A3      | 5          | Female   | 0.06 | 386 | 0.48 (0.19-1.18)      | 0.08       | 0.72       | NA                           | NA                | 0.47 (0.05-4.03)  | 1.64 (0.50-5.35)  | 0.02                | 0.15       | 0.02       | 0.15       | 0.02       | 0.15    |
| rs376511   | SLC6A3      | 5          | Female   | 0.07 | 403 | 1.83 (0.94-3.58)      | 0.09       | 0.71       | 0.90 (0.18-4.48)             | 2.87 (1.02-8.07)  | 7.96 (1.70-37.23) | 1.43 (0.44-4.63)  | 0.19                | 0.55       | 0.19       | 0.55       | 0.19       | 0.55    |
| rs376511   | SLC6A3      | 5          | Female   | 0.20 | 354 | 1.09 (0.65-1.83)      | 0.75       | 1.00       | NA                           | NA                | 0.46 (0.05-4.00)  | 1.77 (0.54-5.83)  | 0.04                | 0.26       | 0.04       | 0.26       | 0.04       | 0.26    |
| rs6347     | SLC6A3      | 5          | Female   | 0.21 | 379 | 1.38 (0.82-2.33)      | 0.23       | 0.96       | 1.01 (0.20-5.12)             | 3.58 (1.23-10.47) | 6.22 (1.16-33.41) | 0.49 (0.10-2.41)  | 0.07                | 0.38       | 0.07       | 0.38       | 0.07       | 0.38    |
| rs37022    | SLC6A3      | 5          | Female   | 0.26 | 352 | 1.32 (0.88-1.99)      | 0.19       | 0.93       | 1.11 (0.33-3.81)             | 1.77 (0.70-4.49)  | 1.19 (0.46-3.06)  | 0.43 (0.12-1.49)  | 0.33                | 0.83       | 0.33       | 0.83       | 0.33       | 0.83    |
| rs10040882 | SLC6A3      | 5          | Female   | 0.27 | 378 | 1.05 (0.70-1.57)      | 0.83       | 1.00       | 2.78 (0.98-7.89)             | 1.03 (0.43-2.49)  | 1.65 (0.43-6.30)  | 0.91 (0.31-2.70)  | 0.42                | 0.84       | 0.42       | 0.84       | 0.42       | 0.84    |
| rs2975292  | SLC6A3      | 5          | Female   | 0.17 | 383 | 0.68 (0.39-1.17)      | 0.16       | 0.90       | 1.28 (0.51-3.21)             | 1.63 (0.70-3.80)  | 1.47 (0.72-3.02)  | 0.95 (0.40-2.27)  | 0.83                | 0.99       | 0.83       | 0.99       | 0.83       | 0.99    |
| rs458334   | SLC6A3      | 5          | Female   | 0.21 | 379 | 1.05 (0.70-1.57)      | 0.83       | 1.00       | 1.62 (0.77-3.42)             | 0.67 (0.31-1.44)  | 2.09 (0.76-5.75)  | 0.68 (0.29-1.62)  | 0.14                | 0.50       | 0.14       | 0.50       | 0.14       | 0.50    |
| rs11737901 | SLC6A3      | 5          | Female   | 0.16 | 401 | 0.86 (0.49-1.50)      | 0.59       | 1.00       | 0.35 (0.07-1.72)             | 0.95 (0.36-2.52)  | 0.91 (0.35-2.39)  | 0.43 (0.13-1.43)  | 0.54                | 0.98       | 0.54       | 0.98       | 0.54       | 0.98    |
| rs409588   | SLC6A3      | 5          | Female   | 0.21 | 379 | 1.13 (0.69-1.86)      | 0.63       | 1.00       | 0.15 (0.02-1.20)             | 0.67 (0.25-1.74)  | 1.04 (0.28-3.92)  | 2.52 (0.89-7.17)  | 0.04                | 0.24       | 0.04       | 0.24       | 0.04       | 0.24    |
| rs4975646  | SLC6A3      | 5          | Female</ |      |     |                       |            |            |                              |                   |                   |                   |                     |            |            |            |            |         |

| SNP        | Gene Region | Chromosome | Gender | MAF                     | N   | Marginal Effect       |            |         | Treatment Stratified Effects |                  |                   |                   | Test of Interaction     |                         |            |
|------------|-------------|------------|--------|-------------------------|-----|-----------------------|------------|---------|------------------------------|------------------|-------------------|-------------------|-------------------------|-------------------------|------------|
|            |             |            |        |                         |     | Likelihood ratio test |            | Placebo | Bupropion                    | Patch            | Spray             | Observed P        | Adjusted P              | Observed P              | Adjusted P |
|            |             |            |        |                         |     | SNP OR (95% CI)       | Adjusted P |         |                              |                  |                   |                   |                         |                         |            |
| rs6859392  | HTR1A       | 5          | Male   | 0.31                    | 386 | 1.09 (0.67-1.77)      | 0.72       | 0.72    | 0.71 (0.24-2.14)             | 2.70 (1.03-7.06) | 0.78 (0.32-1.92)  | 0.79 (0.27-2.25)  | 0.18                    | 0.31                    |            |
|            |             |            | Female | 0.30                    | 402 | 1.10 (0.66-1.82)      | 0.72       | 0.92    | 1.64 (0.59-4.57)             | 0.51 (0.22-1.21) | 1.43 (0.40-5.17)  | 1.98 (0.65-6.06)  | 0.17                    | 0.29                    |            |
| rs10085024 | HTR1A       | 5          | Male   | 0.50                    | 386 | 0.85 (0.60-1.21)      | 0.36       | 0.72    | 1.07 (0.51-2.26)             | 0.84 (0.43-1.62) | 1.09 (0.57-2.09)  | 0.46 (0.20-1.06)  | 0.38                    | 0.54                    |            |
|            |             |            | Female | 0.48                    | 403 | 1.08 (0.76-1.55)      | 0.66       | 0.96    | 0.88 (0.43-1.76)             | 1.52 (0.84-2.73) | 0.78 (0.30-2.07)  | 0.96 (0.45-2.04)  | 0.54                    | 0.71                    |            |
| rs1364043  | HTR1A       | 5          | Male   | 0.25                    | 386 | 0.91 (0.56-1.49)      | 0.71       | 0.92    | 0.62 (0.20-1.90)             | 0.66 (0.26-1.65) | 1.26 (0.52-3.08)  | 1.32 (0.45-3.89)  | 0.59                    | 0.59                    |            |
|            |             |            | Female | 0.21                    | 403 | 1.09 (0.65-1.83)      | 0.74       | 0.74    | 0.94 (0.32-2.76)             | 1.38 (0.58-3.25) | 0.99 (0.26-3.72)  | 0.97 (0.35-2.66)  | 0.93                    | 0.93                    |            |
| rs6295     | HTR1A       | 5          | Male   | 0.49                    | 385 | 0.88 (0.62-1.24)      | 0.46       | 0.81    | 1.38 (0.63-3.02)             | 0.84 (0.43-1.62) | 1.01 (0.53-1.92)  | 0.46 (0.20-1.06)  | 0.27                    | 0.42                    |            |
|            |             |            | Female | 0.48                    | 401 | 1.08 (0.75-1.55)      | 0.68       | 0.96    | 0.86 (0.42-1.73)             | 1.54 (0.84-2.83) | 0.82 (0.32-2.13)  | 0.95 (0.45-2.03)  | 0.54                    | 0.74                    |            |
| rs10042486 | HTR1A       | 5          | Male   | 0.49                    | 384 | 0.87 (0.61-1.23)      | 0.42       | 0.78    | 1.17 (0.55-2.48)             | 0.83 (0.43-1.61) | 1.09 (0.57-2.12)  | 0.46 (0.20-1.06)  | 0.33                    | 0.49                    |            |
|            |             |            | Female | 0.48                    | 403 | 1.09 (0.76-1.55)      | 0.64       | 0.95    | 0.88 (0.44-1.76)             | 1.52 (0.84-2.73) | 0.82 (0.32-2.13)  | 0.96 (0.45-2.04)  | 0.56                    | 0.73                    |            |
| rs13436914 | HTR1A       | 5          | Male   | 1.27 × 10 <sup>3</sup>  | NA  | NA                    | NA         | NA      | NA                           | NA               | NA                | NA                | NA                      | NA                      |            |
|            |             |            | Female | 1.24 × 10 <sup>3</sup>  | NA  | NA                    | NA         | NA      | NA                           | NA               | NA                | NA                | NA                      | NA                      |            |
| rs11954565 | DRD1        | 5          | Male   | 0.34                    | 381 | 0.76 (0.47-1.25)      | 0.28       | 0.95    | 2.77 (0.81-9.47)             | 1.43 (0.57-3.59) | 0.59 (0.23-1.48)  | 0.09 (0.02-0.43)  | 5.83 × 10 <sup>-3</sup> | 6.66 × 10 <sup>-3</sup> |            |
|            |             |            | Female | 0.36                    | 400 | 1.63 (0.96-2.77)      | 0.07       | 0.58    | 3.12 (0.84-11.64)            | 1.76 (0.73-4.23) | 1.20 (0.32-4.54)  | 1.11 (0.41-3.01)  | 0.61                    | 0.94                    |            |
| rs1587176  | DRD1        | 5          | Male   | 0.19                    | 385 | 0.84 (0.50-1.42)      | 0.51       | 0.99    | 0.50 (0.13-1.96)             | 0.36 (0.13-1.00) | 2.42 (0.95-6.12)  | 0.88 (0.29-2.61)  | 0.04                    | 0.22                    |            |
|            |             |            | Female | 0.16                    | 399 | 0.98 (0.56-1.71)      | 0.95       | 1.00    | 0.39 (0.08-1.85)             | 1.18 (0.47-2.95) | 1.37 (0.36-5.22)  | 1.10 (0.39-3.13)  | 0.57                    | 0.96                    |            |
| rs1310277  | DRD1        | 5          | Male   | 0.12                    | 386 | 1.55 (0.89-2.69)      | 0.13       | 0.76    | 2.05 (0.64-6.53)             | 0.93 (0.32-2.71) | 1.60 (0.59-4.34)  | 2.19 (0.65-7.34)  | 0.69                    | 0.98                    |            |
|            |             |            | Female | 0.13                    | 403 | 0.74 (0.41-1.34)      | 0.31       | 0.97    | 0.88 (0.26-2.95)             | 0.35 (0.11-1.10) | 1.27 (0.30-5.42)  | 1.12 (0.38-3.33)  | 0.39                    | 0.90                    |            |
| rs11739696 | DRD1        | 5          | Male   | 0.37                    | 386 | 0.95 (0.67-1.34)      | 0.75       | 1.00    | 1.43 (0.67-3.07)             | 1.09 (0.58-2.06) | 0.85 (0.45-1.62)  | 0.57 (0.25-1.31)  | 0.40                    | 0.89                    |            |
|            |             |            | Female | 0.37                    | 403 | 1.27 (0.89-1.81)      | 0.19       | 0.90    | 1.13 (0.56-2.30)             | 2.01 (1.09-3.70) | 1.07 (0.40-2.87)  | 0.80 (0.38-1.68)  | 0.26                    | 0.82                    |            |
| rs2453737  | DRD1        | 5          | Male   | 0.37                    | 385 | 0.93 (0.57-1.51)      | 0.77       | 1.00    | 1.25 (0.41-3.83)             | 1.21 (0.48-3.04) | 0.82 (0.34-2.01)  | 0.60 (0.21-1.70)  | 0.72                    | 0.98                    |            |
|            |             |            | Female | 0.38                    | 403 | 1.35 (0.80-2.27)      | 0.26       | 0.96    | 1.52 (0.49-4.67)             | 2.06 (0.82-5.16) | 1.21 (0.32-4.53)  | 0.76 (0.28-2.07)  | 0.54                    | 0.95                    |            |
| rs6881740  | DRD1        | 5          | Male   | 0.35                    | 385 | 0.85 (0.60-1.21)      | 0.35       | 0.97    | 1.64 (0.75-3.60)             | 1.16 (0.62-2.20) | 0.71 (0.37-1.37)  | 0.31 (0.12-0.82)  | 0.03                    | 0.19                    |            |
|            |             |            | Female | 0.36                    | 400 | 1.36 (0.95-1.95)      | 0.09       | 0.68    | 1.22 (0.59-2.50)             | 2.15 (1.16-3.98) | 1.16 (0.43-3.12)  | 0.87 (0.42-1.82)  | 0.28                    | 0.85                    |            |
| rs11742274 | DRD1        | 5          | Male   | 0.19                    | 385 | 1.62 (0.98-2.66)      | 0.06       | 0.55    | 0.63 (0.20-2.01)             | 1.83 (0.70-4.81) | 1.37 (0.55-3.43)  | 4.03 (1.37-11.87) | 0.13                    | 0.50                    |            |
|            |             |            | Female | 0.19                    | 402 | 1.15 (0.68-1.94)      | 0.60       | 1.00    | 1.41 (0.49-4.06)             | 0.88 (0.36-2.12) | 0.49 (0.10-2.47)  | 2.00 (0.73-5.45)  | 0.40                    | 0.91                    |            |
| rs265971   | DRD1        | 5          | Male   | 0.28                    | 385 | 0.92 (0.63-1.33)      | 0.64       | 1.00    | 0.62 (0.23-1.65)             | 1.01 (0.53-1.94) | 0.63 (0.30-1.32)  | 1.62 (0.75-3.51)  | 0.28                    | 0.80                    |            |
|            |             |            | Female | 0.29                    | 401 | 0.83 (0.56-1.23)      | 0.35       | 0.97    | 0.89 (0.40-2.00)             | 0.65 (0.32-1.29) | 0.89 (0.34-2.22)  | 1.03 (0.48-2.21)  | 0.83                    | 1.00                    |            |
| rs265972   | DRD1        | 5          | Male   | 0.47                    | 386 | 1.18 (0.84-1.66)      | 0.33       | 0.97    | 0.67 (0.31-1.45)             | 1.27 (0.67-2.41) | 0.86 (0.47-1.59)  | 3.28 (1.40-7.68)  | 0.02                    | 0.16                    |            |
|            |             |            | Female | 0.48                    | 402 | 0.86 (0.60-1.22)      | 0.39       | 0.98    | 1.00 (0.51-1.98)             | 0.58 (0.31-1.09) | 0.56 (0.21-1.47)  | 1.48 (0.74-2.93)  | 0.17                    | 0.67                    |            |
| rs265973   | DRD1        | 5          | Male   | 0.45                    | 386 | 0.87 (0.63-1.20)      | 0.39       | 0.98    | 0.65 (0.29-1.45)             | 0.78 (0.44-1.39) | 0.89 (0.49-1.62)  | 1.23 (0.62-2.45)  | 0.65                    | 0.98                    |            |
|            |             |            | Female | 0.45                    | 403 | 0.72 (0.50-1.05)      | 0.09       | 0.66    | 0.65 (0.30-1.41)             | 0.53 (0.27-1.04) | 1.21 (0.49-3.01)  | 0.82 (0.41-1.64)  | 0.52                    | 0.96                    |            |
| rs265974   | DRD1        | 5          | Male   | 0.35                    | 385 | 1.05 (0.65-1.71)      | 0.84       | 0.99    | 0.57 (0.19-1.71)             | 0.63 (0.26-1.56) | 2.35 (0.88-6.26)  | 1.33 (0.46-3.83)  | 0.15                    | 0.55                    |            |
|            |             |            | Female | 0.34                    | 402 | 0.76 (0.46-1.25)      | 0.28       | 0.96    | 1.23 (0.43-3.48)             | 0.42 (0.17-1.00) | 0.73 (0.20-2.66)  | 1.12 (0.40-3.16)  | 0.36                    | 0.90                    |            |
| rs265975   | DRD1        | 5          | Male   | 0.34                    | 386 | 1.11 (0.78-1.59)      | 0.55       | 0.99    | 0.80 (0.34-1.89)             | 0.64 (0.31-1.34) | 1.99 (1.07-3.68)  | 1.09 (0.51-2.35)  | 0.10                    | 0.43                    |            |
|            |             |            | Female | 0.34                    | 401 | 0.82 (0.56-1.20)      | 0.30       | 0.97    | 1.01 (0.46-2.22)             | 0.58 (0.30-1.11) | 0.91 (0.34-2.46)  | 1.07 (0.50-2.27)  | 0.58                    | 0.96                    |            |
| rs265976   | DRD1        | 5          | Male   | 0.19                    | 386 | 0.80 (0.47-1.34)      | 0.39       | 0.98    | 0.34 (0.07-1.63)             | 0.44 (0.17-1.19) | 2.34 (0.94-5.83)  | 0.63 (0.20-1.96)  | 0.04                    | 0.23                    |            |
|            |             |            | Female | 0.18                    | 402 | 0.79 (0.46-1.36)      | 0.39       | 0.98    | 0.54 (0.16-1.80)             | 0.85 (0.33-2.15) | 1.42 (0.39-5.19)  | 0.68 (0.23-1.98)  | 0.74                    | 0.99                    |            |
| rs10476156 | DRD1        | 5          | Male   | 0.15                    | 386 | 1.44 (0.92-2.26)      | 0.11       | 0.73    | 0.94 (0.32-2.75)             | 1.46 (0.51-4.17) | 1.48 (0.72-3.04)  | 1.92 (0.78-4.72)  | 0.79                    | 0.97                    |            |
|            |             |            | Female | 0.15                    | 403 | 0.90 (0.54-1.48)      | 0.67       | 1.00    | 1.39 (0.56-3.44)             | 0.43 (0.16-1.16) | 0.28 (0.03-2.32)  | 1.77 (0.72-4.33)  | 0.07                    | 0.38                    |            |
| rs265977   | DRD1        | 5          | Male   | 0.17                    | 385 | 0.79 (0.46-1.36)      | 0.40       | 0.98    | 0.39 (0.08-1.87)             | 0.51 (0.19-1.37) | 1.70 (0.67-4.32)  | 0.80 (0.25-2.50)  | 0.24                    | 0.75                    |            |
|            |             |            | Female | 0.17                    | 402 | 0.83 (0.48-1.43)      | 0.49       | 1.00    | 0.60 (0.18-1.98)             | 0.95 (0.37-2.41) | 1.09 (0.29-4.18)  | 0.76 (0.26-2.23)  | 0.91                    | 1.00                    |            |
| rs863126   | DRD1        | 5          | Male   | 0.32                    | 386 | 0.98 (0.68-1.40)      | 0.90       | 0.90    | 1.91 (0.87-4.18)             | 1.32 (0.70-2.49) | 0.82 (0.40-1.68)  | 0.33 (0.13-0.88)  | 0.02                    | 0.16                    |            |
|            |             |            | Female | 0.32                    | 403 | 1.34 (0.92-1.94)      | 0.13       | 0.78    | 1.12 (0.54-2.29)             | 2.10 (1.10-4.03) | 1.06 (0.38-2.95)  | 1.00 (0.47-2.14)  | 0.41                    | 0.91                    |            |
| rs835616   | DRD1        | 5          | Male   | 0.38                    | 384 | 0.78 (0.48-1.27)      | 0.32       | 0.96    | 0.30 (0.10-0.92)             | 0.94 (0.38-2.31) | 0.72 (0.29-1.77)  | 1.60 (0.54-4.76)  | 0.19                    | 0.65                    |            |
|            |             |            | Female | 0.35                    | 400 | 1.13 (0.68-1.88)      | 0.63       | 1.00    | 1.02 (0.36-2.83)             | 1.17 (0.49-2.77) | 1.01 (0.27-3.83)  | 1.28 (0.47-3.50)  | 0.99                    | 0.99                    |            |
| rs835540   | DRD1        | 5          | Male   | 0.26                    | 386 | 1.05 (0.64-1.71)      | 0.85       | 0.97    | 2.03 (0.67-6.10)             | 1.94 (0.78-4.83) | 0.91 (0.37-2.27)  | 0.27 (0.08-0.91)  | 0.03                    | 0.19                    |            |
|            |             |            | Female | 0.25                    | 401 | 1.30 (0.78-2.17)      | 0.31       | 0.97    | 0.91 (0.33-2.53)             | 1.88 (0.79-4.46) | 0.64 (0.17-2.38)  | 1.76 (0.65-4.78)  | 0.44                    | 0.90                    |            |
| rs4867796  | DRD1        | 5          | Male   | 0.16                    | 383 | 1.42 (0.94-2.16)      | 0.10       | 0.71    | 1.79 (0.74-4.31)             | 1.23 (0.52-2.94) | 1.32 (0.66-2.65)  | 1.51 (0.60-3.81)  | 0.93                    | 0.93                    |            |
|            |             |            | Female | 0.18                    | 403 | 1.08 (0.67-1.72)      | 0.76       | 1.00    | 1.56 (0.54-4.50)             | 0.90 (0.43-1.89) | 0.29 (0.03-2.43)  | 1.50 (0.66-3.42)  | 0.35                    | 0.91                    |            |
| rs11746641 | DRD1        | 5          | Male   | 0.16                    | 386 | 1.49 (0.98-2.28)      | 0.07       | 0.58    | 1.85 (0.77-4.44)             | 1.29 (0.48-3.48) | 1.34 (0.66-2.72)  | 1.62 (0.66-3.97)  | 0.93                    | 0.99                    |            |
|            |             |            | Female | 0.17                    | 403 | 0.98 (0.60-1.59)      | 0.94       | 1.00    | 1.63 (0.56-4.74)             | 0.76 (0.34-1.71) | 0.31 (0.04-2.61)  | 1.24 (0.52-2.80)  | 0.39                    | 0.99                    |            |
| rs11749676 | DRD1        | 5          | Male   | 0.41                    | 385 | 0.77 (0.47-1.26)      | 0.29       | 0.95    | 0.22 (0.07-0.70)             | 1.50 (0.57-3.95) | 0.66 (0.27-1.65)  | 1.25 (0.42-3.73)  | 0.05                    | 0.28                    |            |
|            |             |            | Female | 0.40                    | 402 | 1.05 (0.63-1.77)      | 0.84       | 1.00    | 1.21 (0.43-3.44)             | 0.86 (0.36-2.06) | 2.16 (0.43-10.90) | 0.87 (0.32-2.37)  | 0.74                    | 0.99                    |            |
| rs5326     | DRD1        | 5          | Male   | 0.13                    | 386 | 1.06 (0.61-1.84)      | 0.83       | 1.00    | 1.13 (0.32-4.01)             | 0.90 (0.33-2.48) | 1.68 (0.64-4.39)  | 0.60 (0.16-2.33)  | 0.64                    | 0.99                    |            |
|            |             |            | Female | 0.13                    | 403 | 1.01 (0.56-1.81)      | 0.98       | 1.00    | 0.52 (0.14-1.95)             | 1.66 (0.63-4.41) | 0.96 (0.23-4.04)  | 0.96 (0.31-3.03)  | 0.56                    | 0.96                    |            |
| rs265981   | DRD1        | 5          | Male   | 0.41                    | 351 | 0.82 (0.49-1.36)      | 0.44       | 0.98    | 0.22 (0.07-0.72)             | 1.66 (0.59-4.65) | 0.73 (0.29-1.85)  | 1.40 (0.46-4.26)  | 0.05                    | 0.25                    |            |
|            |             |            | Female | 0.40                    | 354 | 1.25 (0.73-2.15)      | 0.42       | 0.99    | 1.18 (0.41-3.45)             | 0.95 (0.38-2.37) | 2.26 (0.43-12.01) | 1.45 (0.52-4.04)  | 0.81                    | 1.00                    |            |
| rs2168631  | DRD1        | 5          | Male   | 0.17                    | 386 | 1.72 (1.14-2.60)      | 0.01       | 0.16    | 2.30 (0.96-5.51)             | 1.97 (0.80-4.84) | 1.44 (0.72-2.91)  | 1.48 (0.60-3.63)  | 0.83                    | 0.95                    |            |
|            |             |            | Female | 0.18                    | 403 | 0.99 (0.63-1.58)      | 0.98       | 0.98    | 1.64 (0.56-4.74)             | 0.73 (0.33-1.57) | 0.29 (0.03-2.39)  | 1.41 (0.65-3.05)  | 0.26                    | 0.82                    |            |
| rs6878159  | DRD1        | 5          | Male   | 0.01                    | NA  | NA                    | NA         | NA      | NA                           | NA               | NA                | NA                | NA                      | NA                      |            |
|            |             |            | Female | 8.66 × 10 <sup>-3</sup> | NA  | NA                    | NA         | NA      | NA                           | NA               | NA                | NA                | NA                      | NA                      |            |
| rs267417   | DRD1        | 5          | Male   | 0.40                    | 386 | 0.87 (0.62-1.22)      | 0.43       | 0.98    | 0.29 (0.11-0.74)             | 1.33 (0.72-2.47) | 0.78 (0.40-1.52)  | 1.43 (0.70-2.94)  | 0.01                    | 0.11                    |            |

| SNP        | Gene Region | Chromosome | Gender | MAF  | N   | Marginal Effect       |            |         | Treatment Stratified Effects |                  |                   |                   | Test of Interaction |            |            |
|------------|-------------|------------|--------|------|-----|-----------------------|------------|---------|------------------------------|------------------|-------------------|-------------------|---------------------|------------|------------|
|            |             |            |        |      |     | Likelihood ratio test |            | Placebo | Bupropion                    | Patch            | Spray             | Observed P        | Adjusted P          | Observed P | Adjusted P |
|            |             |            |        |      |     | SNP OR (95% CI)       | Adjusted P |         |                              |                  |                   |                   |                     |            |            |
| rs9475195  | HCRTR2      | 6          | Male   | 0.38 | 385 | 0.78 (0.48-1.28)      | 0.33       | 0.99    | 0.62 (0.21-1.85)             | 1.27 (0.48-3.35) | 0.69 (0.28-1.71)  | 0.64 (0.23-1.82)  | 0.71                | 1.00       |            |
|            |             |            | Female | 0.41 | 403 | 1.27 (0.74-2.17)      | 0.38       | 1.00    | 1.48 (0.48-4.54)             | 1.14 (0.48-2.71) | 0.49 (0.13-1.76)  | 2.91 (0.78-10.91) | 0.26                | 0.90       |            |
| rs1334696  | HCRTR2      | 6          | Male   | 0.21 | 386 | 1.27 (0.78-2.08)      | 0.34       | 0.98    | 1.44 (0.48-4.28)             | 1.33 (0.53-3.35) | 0.73 (0.28-1.89)  | 2.17 (0.76-6.25)  | 0.50                | 1.00       |            |
|            |             |            | Female | 0.19 | 402 | 1.17 (0.69-1.97)      | 0.56       | 1.00    | 0.55 (0.17-1.83)             | 0.90 (0.36-2.22) | 3.16 (0.86-11.60) | 1.66 (0.60-4.62)  | 0.20                | 0.80       |            |
| rs1322148  | HCRTR2      | 6          | Male   | 0.21 | 386 | 1.24 (0.76-2.04)      | 0.39       | 0.99    | 1.44 (0.48-4.28)             | 1.24 (0.50-3.11) | 0.73 (0.28-1.89)  | 2.18 (0.76-6.25)  | 0.50                | 1.00       |            |
|            |             |            | Female | 0.19 | 401 | 1.12 (0.67-1.89)      | 0.67       | 1.00    | 0.55 (0.16-1.81)             | 0.88 (0.36-2.18) | 2.97 (0.81-10.87) | 1.51 (0.55-4.13)  | 0.23                | 0.86       |            |
| rs10498801 | HCRTR2      | 6          | Male   | 0.19 | 386 | 1.34 (0.82-2.20)      | 0.25       | 0.97    | 1.33 (0.44-4.00)             | 1.44 (0.57-3.63) | 0.82 (0.31-2.13)  | 2.30 (0.80-6.61)  | 0.56                | 1.00       |            |
|            |             |            | Female | 0.18 | 403 | 1.19 (0.70-2.01)      | 0.52       | 1.00    | 0.61 (0.18-2.03)             | 0.84 (0.33-2.14) | 3.17 (0.86-11.67) | 1.70 (0.62-4.67)  | 0.21                | 0.83       |            |
| rs12111375 | HCRTR2      | 6          | Male   | 0.48 | 342 | 0.62 (0.39-0.99)      | 0.04       | 0.51    | 0.37 (0.11-1.26)             | 0.51 (0.20-1.29) | 0.70 (0.32-1.53)  | 0.86 (0.34-2.15)  | 0.70                | 1.00       |            |
|            |             |            | Female | 0.49 | 367 | 0.98 (0.64-1.50)      | 0.93       | 1.00    | 1.32 (0.57-3.08)             | 1.15 (0.57-2.33) | 0.69 (0.23-2.08)  | 0.70 (0.29-1.68)  | 0.64                | 0.99       |            |
| rs9367622  | HCRTR2      | 6          | Male   | 0.16 | 386 | 1.45 (0.92-2.29)      | 0.12       | 0.83    | 1.19 (0.48-2.98)             | 1.79 (0.67-4.81) | 1.30 (0.56-3.03)  | 1.69 (0.66-4.35)  | 0.92                | 1.00       |            |
|            |             |            | Female | 0.15 | 403 | 1.11 (0.69-1.78)      | 0.66       | 1.00    | 0.74 (0.25-2.15)             | 0.87 (0.36-2.08) | 1.70 (0.56-5.23)  | 1.56 (0.66-3.70)  | 0.56                | 0.99       |            |
| rs13134705 | HCRTR2      | 6          | Male   | 0.41 | 386 | 1.07 (0.65-1.77)      | 0.78       | 1.00    | 1.99 (0.52-7.72)             | 0.54 (0.22-1.35) | 1.02 (0.41-2.51)  | 1.94 (0.62-6.05)  | 0.25                | 0.90       |            |
|            |             |            | Female | 0.38 | 403 | 1.14 (0.68-1.92)      | 0.61       | 1.00    | 0.53 (0.19-1.49)             | 1.42 (0.59-3.40) | 1.07 (0.30-3.85)  | 2.11 (0.64-6.99)  | 0.32                | 0.94       |            |
| rs1322153  | HCRTR2      | 6          | Male   | 0.23 | 385 | 1.14 (0.70-1.86)      | 0.61       | 1.00    | 1.32 (0.44-3.95)             | 0.85 (0.34-2.10) | 0.80 (0.31-2.09)  | 2.26 (0.79-6.49)  | 0.45                | 1.00       |            |
|            |             |            | Female | 0.20 | 402 | 0.93 (0.55-1.58)      | 0.79       | 1.00    | 0.34 (0.09-1.26)             | 0.72 (0.29-1.83) | 2.97 (0.81-10.88) | 1.34 (0.49-3.64)  | 0.09                | 0.51       |            |
| rs14142972 | HCRTR2      | 6          | Male   | 0.17 | 386 | 0.94 (0.56-1.60)      | 0.82       | 1.00    | 1.02 (0.33-3.13)             | 0.48 (0.16-1.43) | 1.04 (0.40-2.73)  | 1.66 (0.62-4.90)  | 0.45                | 1.00       |            |
|            |             |            | Female | 0.18 | 403 | 0.94 (0.55-1.61)      | 0.83       | 1.00    | 0.67 (0.20-2.25)             | 1.71 (0.73-4.04) | 0.41 (0.08-2.04)  | 0.79 (0.27-2.29)  | 0.32                | 0.94       |            |
| rs1322154  | HCRTR2      | 6          | Male   | 0.21 | 384 | 1.07 (0.65-1.75)      | 0.80       | 1.00    | 0.81 (0.25-2.59)             | 1.75 (0.71-4.34) | 1.28 (0.52-3.18)  | 0.52 (0.17-1.62)  | 0.37                | 0.98       |            |
|            |             |            | Female | 0.20 | 403 | 0.80 (0.47-1.38)      | 0.42       | 1.00    | 1.63 (0.57-4.65)             | 0.56 (0.23-1.38) | 0.68 (0.18-2.55)  | 0.73 (0.22-2.45)  | 0.49                | 0.97       |            |
| rs12662510 | HCRTR2      | 6          | Male   | 0.15 | 378 | 1.31 (0.77-2.21)      | 0.32       | 0.99    | 0.92 (0.28-2.99)             | 1.61 (0.61-4.30) | 1.08 (0.41-2.85)  | 1.83 (0.58-5.79)  | 0.80                | 1.00       |            |
|            |             |            | Female | 0.15 | 399 | 1.09 (0.63-1.91)      | 0.75       | 1.00    | 0.59 (0.16-2.26)             | 0.68 (0.25-1.90) | 2.30 (0.62-8.50)  | 1.81 (0.64-5.12)  | 0.28                | 0.92       |            |
| rs9370403  | HCRTR2      | 6          | Male   | 0.20 | 373 | 0.98 (0.62-1.55)      | 0.94       | 1.00    | 0.79 (0.28-2.18)             | 1.56 (0.63-3.87) | 1.13 (0.51-2.55)  | 0.58 (0.20-1.66)  | 0.50                | 1.00       |            |
|            |             |            | Female | 0.19 | 386 | 0.72 (0.43-1.19)      | 0.18       | 0.93    | 1.23 (0.46-3.30)             | 0.49 (0.20-1.18) | 1.00 (0.37-2.70)  | 0.50 (0.14-1.72)  | 0.46                | 0.99       |            |
| rs13134710 | HCRTR2      | 6          | Male   | 0.25 | 386 | 1.01 (0.67-1.53)      | 0.95       | 1.00    | 0.98 (0.37-2.57)             | 1.06 (0.48-2.34) | 1.02 (0.48-2.18)  | 0.97 (0.42-2.27)  | 1.00                | 1.00       |            |
|            |             |            | Female | 0.25 | 403 | 0.75 (0.49-1.15)      | 0.18       | 0.93    | 0.78 (0.34-1.79)             | 0.38 (0.17-0.89) | 1.76 (0.65-4.78)  | 0.90 (0.41-2.98)  | 0.13                | 0.64       |            |
| rs1322156  | HCRTR2      | 6          | Male   | 0.25 | 386 | 1.01 (0.67-1.52)      | 0.97       | 1.00    | 0.95 (0.37-2.46)             | 1.06 (0.48-2.34) | 1.02 (0.48-2.18)  | 0.97 (0.42-2.27)  | 1.00                | 1.00       |            |
|            |             |            | Female | 0.25 | 403 | 0.75 (0.49-1.14)      | 0.17       | 0.91    | 0.78 (0.34-1.79)             | 0.38 (0.17-0.88) | 1.76 (0.65-4.78)  | 0.90 (0.41-1.98)  | 0.12                | 0.62       |            |
| rs4311511  | HCRTR2      | 6          | Male   | 0.30 | 383 | 0.93 (0.63-1.37)      | 0.70       | 1.00    | 0.92 (0.37-2.25)             | 0.95 (0.46-1.95) | 1.22 (0.61-2.46)  | 0.63 (0.27-1.48)  | 0.70                | 1.00       |            |
|            |             |            | Female | 0.28 | 399 | 0.81 (0.54-1.22)      | 0.31       | 0.99    | 0.83 (0.37-1.83)             | 0.56 (0.27-1.19) | 1.79 (0.70-4.60)  | 0.72 (0.31-1.66)  | 0.29                | 0.93       |            |
| rs4311512  | HCRTR2      | 6          | Male   | 0.29 | 386 | 0.93 (0.63-1.36)      | 0.71       | 1.00    | 0.92 (0.37-2.25)             | 0.91 (0.45-1.87) | 1.27 (0.63-2.53)  | 0.63 (0.27-1.48)  | 0.66                | 1.00       |            |
|            |             |            | Female | 0.27 | 403 | 0.80 (0.53-1.19)      | 0.27       | 0.98    | 0.78 (0.35-1.71)             | 0.57 (0.27-1.19) | 1.79 (0.70-4.60)  | 0.72 (0.31-1.67)  | 0.29                | 0.93       |            |
| rs9382467  | HCRTR2      | 6          | Male   | 0.48 | 386 | 1.18 (0.67-2.09)      | 0.56       | 1.00    | 1.21 (0.30-4.77)             | 1.18 (0.43-3.25) | 1.91 (0.58-6.22)  | 0.71 (0.23-2.16)  | 0.69                | 1.00       |            |
|            |             |            | Female | 0.45 | 402 | 0.76 (0.45-1.28)      | 0.31       | 0.99    | 0.78 (0.27-2.22)             | 1.00 (0.41-2.40) | 0.73 (0.17-3.11)  | 0.53 (0.19-1.47)  | 0.84                | 0.99       |            |
| rs9349768  | HCRTR2      | 6          | Male   | 0.22 | 386 | 1.03 (0.67-1.59)      | 0.89       | 1.00    | 1.13 (0.43-2.93)             | 1.05 (0.44-2.55) | 1.29 (0.58-2.83)  | 0.72 (0.29-1.77)  | 0.80                | 1.00       |            |
|            |             |            | Female | 0.22 | 403 | 0.69 (0.44-1.08)      | 0.09       | 0.75    | 0.71 (0.29-1.73)             | 0.41 (0.18-0.97) | 1.61 (0.55-4.67)  | 0.74 (0.31-1.79)  | 0.27                | 0.91       |            |
| rs7771240  | HCRTR2      | 6          | Male   | 0.29 | 386 | 0.90 (0.61-1.34)      | 0.61       | 1.00    | 0.92 (0.37-2.25)             | 0.82 (0.39-1.71) | 1.33 (0.65-2.71)  | 0.61 (0.26-1.44)  | 0.56                | 1.00       |            |
|            |             |            | Female | 0.27 | 402 | 0.80 (0.54-1.20)      | 0.28       | 0.99    | 0.79 (0.36-1.75)             | 0.57 (0.27-1.19) | 1.80 (0.70-4.60)  | 0.72 (0.31-1.67)  | 0.29                | 0.93       |            |
| rs9357850  | HCRTR2      | 6          | Male   | 0.22 | 386 | 1.04 (0.67-1.60)      | 0.88       | 1.00    | 1.13 (0.43-2.93)             | 1.06 (0.44-2.55) | 1.38 (0.61-3.13)  | 0.69 (0.28-1.71)  | 0.73                | 1.00       |            |
|            |             |            | Female | 0.23 | 403 | 0.69 (0.44-1.07)      | 0.09       | 0.74    | 0.71 (0.29-1.73)             | 0.41 (0.18-0.97) | 1.49 (0.53-4.13)  | 0.74 (0.31-1.79)  | 0.30                | 0.93       |            |
| rs9475210  | HCRTR2      | 6          | Male   | 0.07 | 386 | 0.72 (0.34-1.53)      | 0.38       | 0.99    | 0.49 (0.06-4.27)             | 0.68 (0.20-2.35) | 1.15 (0.33-4.01)  | 0.41 (0.05-3.50)  | 0.81                | 1.00       |            |
|            |             |            | Female | 0.05 | 403 | 1.33 (0.60-2.96)      | 0.49       | 1.00    | 0.53 (0.06-4.45)             | 2.23 (0.58-8.58) | 2.87 (0.49-16.77) | 0.81 (0.16-4.12)  | 0.48                | 0.99       |            |
| rs4074181  | HCRTR2      | 6          | Male   | 0.22 | 386 | 1.04 (0.67-1.60)      | 0.88       | 1.00    | 1.13 (0.43-2.93)             | 1.06 (0.44-2.55) | 1.38 (0.61-3.13)  | 0.69 (0.28-1.71)  | 0.73                | 1.00       |            |
|            |             |            | Female | 0.22 | 402 | 0.70 (0.45-1.09)      | 0.10       | 0.78    | 0.75 (0.31-1.85)             | 0.41 (0.18-0.97) | 1.49 (0.53-4.13)  | 0.75 (0.32-1.76)  | 0.30                | 0.93       |            |
| rs13134711 | HCRTR2      | 6          | Male   | 0.29 | 386 | 0.90 (0.61-1.34)      | 0.61       | 1.00    | 0.92 (0.37-2.25)             | 0.82 (0.39-1.71) | 1.33 (0.65-2.71)  | 0.61 (0.26-1.44)  | 0.56                | 1.00       |            |
|            |             |            | Female | 0.27 | 403 | 0.80 (0.53-1.19)      | 0.26       | 0.98    | 0.78 (0.35-1.71)             | 0.57 (0.27-1.19) | 1.79 (0.70-4.60)  | 0.72 (0.32-1.64)  | 0.29                | 0.93       |            |
| rs7741664  | HCRTR2      | 6          | Male   | 0.26 | 386 | 0.99 (0.65-1.50)      | 0.96       | 1.00    | 1.10 (0.43-2.81)             | 1.00 (0.45-2.26) | 1.23 (0.58-2.58)  | 0.66 (0.26-1.64)  | 0.76                | 1.00       |            |
|            |             |            | Female | 0.25 | 402 | 0.73 (0.48-1.11)      | 0.13       | 0.85    | 0.76 (0.33-1.76)             | 0.45 (0.20-1.01) | 1.57 (0.60-4.11)  | 0.72 (0.32-1.65)  | 0.28                | 0.91       |            |
| rs9357853  | HCRTR2      | 6          | Male   | 0.26 | 386 | 1.01 (0.66-1.53)      | 0.98       | 0.98    | 1.10 (0.43-2.81)             | 0.97 (0.43-2.19) | 1.23 (0.58-2.58)  | 0.71 (0.31-1.81)  | 0.86                | 1.00       |            |
|            |             |            | Female | 0.26 | 403 | 0.71 (0.47-1.08)      | 0.10       | 0.77    | 0.71 (0.31-1.63)             | 0.45 (0.20-0.99) | 1.57 (0.60-4.11)  | 0.72 (0.32-1.65)  | 0.27                | 0.91       |            |
| rs1322167  | HCRTR2      | 6          | Male   | 0.30 | 386 | 0.89 (0.60-1.31)      | 0.55       | 1.00    | 0.92 (0.37-2.25)             | 0.82 (0.39-1.71) | 1.23 (0.62-2.42)  | 0.61 (0.26-1.44)  | 0.64                | 1.00       |            |
|            |             |            | Female | 0.28 | 401 | 0.79 (0.53-1.18)      | 0.24       | 0.97    | 0.77 (0.35-1.69)             | 0.56 (0.27-1.16) | 1.80 (0.70-4.61)  | 0.72 (0.32-1.64)  | 0.28                | 0.92       |            |
| rs1322169  | HCRTR2      | 6          | Male   | 0.19 | 385 | 0.92 (0.55-1.53)      | 0.74       | 1.00    | 0.98 (0.32-3.02)             | 0.83 (0.32-2.14) | 1.16 (0.45-2.99)  | 0.71 (0.23-2.23)  | 0.92                | 1.00       |            |
|            |             |            | Female | 0.18 | 403 | 1.02 (0.60-1.74)      | 0.94       | 1.00    | 1.07 (0.36-3.17)             | 1.41 (0.58-3.40) | 0.68 (0.16-2.82)  | 0.77 (0.25-2.37)  | 0.78                | 1.00       |            |
| rs2811239  | HCRTR2      | 6          | Male   | 0.19 | 386 | 1.09 (0.71-1.67)      | 0.71       | 1.00    | 1.27 (0.53-3.07)             | 1.02 (0.44-2.40) | 1.17 (0.54-2.53)  | 0.89 (0.35-2.28)  | 0.95                | 1.00       |            |
|            |             |            | Female | 0.17 | 403 | 1.08 (0.69-1.69)      | 0.74       | 1.00    | 1.17 (0.48-2.84)             | 1.72 (0.74-4.01) | 0.60 (0.18-1.99)  | 0.89 (0.36-2.21)  | 0.48                | 0.99       |            |
| rs2653342  | HCRTR2      | 6          | Male   | 0.16 | 386 | 1.08 (0.69-1.69)      | 0.73       | 1.00    | 0.85 (0.30-2.43)             | 1.11 (0.46-2.66) | 1.20 (0.56-2.60)  | 1.10 (0.42-2.88)  | 0.96                | 1.00       |            |
|            |             |            | Female | 0.15 | 403 | 1.12 (0.70-1.80)      | 0.64       | 1.00    | 1.27 (0.51-3.16)             | 1.69 (0.72-3.98) | 0.65 (0.19-2.19)  | 0.89 (0.32-2.45)  | 0.57                | 0.98       |            |
| rs2653343  | HCRTR2      | 6          | Male   | 0.20 | 386 | 1.08 (0.71-1.64)      | 0.71       | 1.00    | 0.86 (0.33-2.24)             | 1.07 (0.49-2.31) | 1.17 (0.55-2.52)  | 1.22 (0.50-3.00)  | 0.95                | 1.00       |            |
|            |             |            | Female | 0.18 | 403 | 1.15 (0.74-1.79)      | 0.53       | 1.00    | 1.18 (0.52-2.68)             | 1.64 (0.74-3.65) | 0.80 (0.27-2.37)  | 0.91 (0.34-2.48)  | 0.70                | 0.99       |            |
| rs2134294  | HCRTR2      | 6          | Male   | 0.47 | 385 | 0.96 (0.68-1.36)      | 0.81       | 1.00    | 0.93 (0.41-2.09)             | 0.94 (0.50-1.75) | 1.25 (0.64-2.44)  | 0.74 (0.36-1.54)  | 0.78                | 1.00       |            |
|            |             |            | Female | 0.43 | 402 | 0.93 (0.65-1.33)      | 0.69       | 1.00    | 0.95 (0.48-1.86)             |                  |                   |                   |                     |            |            |

| SNP        | Gene Region | Chromosome | Gender | MAF  | N   | Marginal Effect       |            |         | Treatment Stratified Effects |                  |                   |                   | Test of Interaction     |                         |
|------------|-------------|------------|--------|------|-----|-----------------------|------------|---------|------------------------------|------------------|-------------------|-------------------|-------------------------|-------------------------|
|            |             |            |        |      |     | Likelihood ratio test |            | Placebo | Bupropion                    | Patch            | Spray             | Observed P        | Adjusted P              |                         |
|            |             |            |        |      |     | SNP OR (95% CI)       | Observed P |         |                              |                  |                   |                   |                         | SNP OR (95% CI)         |
| rs11568817 | HTR1B       | 6          | Male   | 0.47 | 386 | 0.98 (0.70-1.39)      | 0.93       | 0.93    | 0.86 (0.41-1.83)             | 1.48 (0.74-2.95) | 0.99 (0.54-1.83)  | 0.67 (0.30-1.47)  | 0.49                    | 0.99                    |
|            |             |            | Female | 0.43 | 403 | 1.07 (0.74-1.53)      | 0.73       | 1.00    | 0.92 (0.43-1.96)             | 1.12 (0.60-2.08) | 0.71 (0.27-1.85)  | 1.45 (0.71-2.94)  | 0.65                    | 1.00                    |
| rs1228814  | HTR1B       | 6          | Male   | 0.46 | 380 | 0.97 (0.69-1.38)      | 0.88       | 1.00    | 0.83 (0.39-1.77)             | 1.51 (0.73-3.12) | 0.99 (0.54-1.82)  | 0.66 (0.30-1.46)  | 0.47                    | 0.99                    |
|            |             |            | Female | 0.43 | 395 | 0.99 (0.68-1.45)      | 0.97       | 1.00    | 0.65 (0.28-1.52)             | 1.21 (0.64-2.28) | 0.70 (0.27-1.83)  | 1.30 (0.62-2.69)  | 0.49                    | 0.98                    |
| rs4140555  | HTR1B       | 6          | Male   | 0.38 | 386 | 0.95 (0.58-1.55)      | 0.84       | 1.00    | 1.05 (0.34-3.24)             | 0.47 (0.19-1.16) | 1.21 (0.49-3.03)  | 1.72 (0.55-5.35)  | 0.28                    | 0.90                    |
|            |             |            | Female | 0.38 | 403 | 0.84 (0.51-1.40)      | 0.51       | 1.00    | 1.00 (0.35-2.84)             | 0.67 (0.28-1.57) | 2.24 (0.45-11.28) | 0.62 (0.23-1.68)  | 0.50                    | 0.98                    |
| rs10806098 | HTR1B       | 6          | Male   | 0.29 | 386 | 1.03 (0.72-1.48)      | 0.87       | 1.00    | 0.64 (0.25-1.65)             | 0.90 (0.45-1.81) | 1.12 (0.59-2.13)  | 1.48 (0.71-3.10)  | 0.54                    | 1.00                    |
|            |             |            | Female | 0.28 | 403 | 1.08 (0.72-1.62)      | 0.70       | 1.00    | 0.70 (0.29-1.72)             | 1.21 (0.63-2.32) | 1.94 (0.71-5.30)  | 0.91 (0.39-2.12)  | 0.47                    | 0.99                    |
| rs1213365  | HTR1B       | 6          | Male   | 0.47 | 356 | 1.08 (0.62-1.88)      | 0.80       | 1.00    | 1.14 (0.32-4.10)             | 0.55 (0.19-1.62) | 1.56 (0.58-4.23)  | 1.31 (0.38-4.53)  | 0.55                    | 1.00                    |
|            |             |            | Female | 0.49 | 373 | 1.18 (0.65-2.14)      | 0.58       | 1.00    | 1.44 (0.43-4.86)             | 0.73 (0.26-2.05) | 1.66 (0.32-8.52)  | 1.43 (0.46-4.41)  | 0.76                    | 1.00                    |
| rs1213366  | HTR1B       | 6          | Male   | 0.46 | 386 | 1.04 (0.74-1.47)      | 0.80       | 1.00    | 0.91 (0.43-1.94)             | 1.37 (0.70-2.69) | 1.13 (0.61-2.09)  | 0.76 (0.36-1.62)  | 0.68                    | 0.99                    |
|            |             |            | Female | 0.43 | 403 | 1.01 (0.70-1.46)      | 0.94       | 1.00    | 0.97 (0.46-2.04)             | 1.01 (0.53-1.91) | 0.68 (0.26-1.79)  | 1.32 (0.66-2.65)  | 0.74                    | 1.00                    |
| rs1213369  | HTR1B       | 6          | Male   | 0.42 | 386 | 0.86 (0.52-1.42)      | 0.55       | 1.00    | 0.68 (0.22-2.13)             | 0.49 (0.20-1.23) | 1.26 (0.49-3.19)  | 1.37 (0.44-4.27)  | 0.41                    | 0.98                    |
|            |             |            | Female | 0.43 | 403 | 0.78 (0.46-1.32)      | 0.36       | 0.99    | 0.81 (0.28-2.32)             | 0.68 (0.27-1.67) | 1.49 (0.29-7.60)  | 0.68 (0.25-1.85)  | 0.84                    | 1.00                    |
| rs1213370  | HTR1B       | 6          | Male   | 0.45 | 386 | 1.33 (0.78-2.29)      | 0.29       | 0.97    | 1.29 (0.37-4.49)             | 0.92 (0.34-2.46) | 1.62 (0.60-4.34)  | 1.72 (0.51-5.80)  | 0.83                    | 1.00                    |
|            |             |            | Female | 0.47 | 403 | 1.28 (0.72-2.28)      | 0.39       | 0.99    | 1.40 (0.42-4.69)             | 0.92 (0.36-2.37) | 1.78 (0.35-9.07)  | 1.55 (0.50-4.77)  | 0.86                    | 1.00                    |
| rs1213371  | HTR1B       | 6          | Male   | 0.46 | 385 | 1.02 (0.72-1.45)      | 0.90       | 1.00    | 0.91 (0.43-1.94)             | 1.34 (0.68-2.65) | 1.08 (0.58-2.02)  | 0.76 (0.36-1.62)  | 0.72                    | 1.00                    |
|            |             |            | Female | 0.43 | 400 | 1.04 (0.72-1.49)      | 0.84       | 1.00    | 0.97 (0.46-2.04)             | 1.02 (0.54-1.91) | 0.80 (0.31-2.03)  | 1.32 (0.66-2.65)  | 0.85                    | 1.00                    |
| rs1936158  | HTR1B       | 6          | Male   | 0.40 | 386 | 0.92 (0.56-1.51)      | 0.74       | 1.00    | 1.11 (0.35-3.58)             | 0.49 (0.20-1.20) | 1.15 (0.46-2.88)  | 1.45 (0.47-4.53)  | 0.41                    | 0.98                    |
|            |             |            | Female | 0.41 | 403 | 0.71 (0.43-1.19)      | 0.20       | 0.92    | 0.85 (0.30-2.43)             | 0.53 (0.22-1.25) | 1.99 (0.39-10.08) | 0.56 (0.21-1.51)  | 0.45                    | 0.98                    |
| rs12173930 | HTR1B       | 6          | Male   | 0.11 | 384 | 0.97 (0.53-1.76)      | 0.92       | 1.00    | 1.06 (0.26-4.25)             | 1.14 (0.42-3.05) | 1.18 (0.38-3.73)  | 0.47 (0.10-2.27)  | 0.76                    | 1.00                    |
|            |             |            | Female | 0.13 | 403 | 1.17 (0.65-2.08)      | 0.60       | 1.00    | 1.23 (0.42-3.66)             | 1.08 (0.38-3.05) | 1.47 (0.35-6.28)  | 1.06 (0.34-3.33)  | 0.98                    | 1.00                    |
| rs2798949  | HTR1B       | 6          | Male   | 0.37 | 386 | 1.47 (0.88-2.46)      | 0.14       | 0.82    | 2.09 (0.67-7.16)             | 1.56 (0.61-4.00) | 2.72 (0.92-8.01)  | 0.53 (0.18-1.49)  | 0.15                    | 0.68                    |
|            |             |            | Female | 0.34 | 402 | 0.95 (0.57-1.57)      | 0.83       | 1.00    | 0.92 (0.33-2.56)             | 0.72 (0.31-1.67) | 0.66 (0.18-2.40)  | 1.94 (0.63-5.94)  | 0.49                    | 0.98                    |
| rs9352483  | HTR1B       | 6          | Male   | 0.14 | 385 | 0.75 (0.42-1.34)      | 0.33       | 0.98    | 0.73 (0.18-2.91)             | 0.67 (0.24-1.92) | 0.59 (0.20-1.76)  | 1.22 (0.38-3.92)  | 0.83                    | 0.99                    |
|            |             |            | Female | 0.15 | 402 | 1.53 (0.90-2.62)      | 0.12       | 0.81    | 0.98 (0.32-3.05)             | 1.70 (0.70-4.12) | 1.38 (0.36-5.25)  | 2.21 (0.74-6.61)  | 0.78                    | 1.00                    |
| rs4543330  | HTR1B       | 6          | Male   | 0.15 | 386 | 1.54 (0.97-2.43)      | 0.07       | 0.60    | 1.43 (0.49-4.13)             | 2.14 (0.96-4.78) | 1.63 (0.68-3.91)  | 0.85 (0.27-2.66)  | 0.61                    | 1.00                    |
|            |             |            | Female | 0.15 | 402 | 0.91 (0.56-1.50)      | 0.72       | 1.00    | 1.11 (0.37-3.27)             | 0.69 (0.27-1.79) | 0.81 (0.24-2.78)  | 1.12 (0.47-2.65)  | 0.87                    | 1.00                    |
| rs1343491  | HTR1B       | 6          | Male   | 0.08 | 386 | 0.62 (0.31-1.27)      | 0.17       | 0.87    | 1.07 (0.29-3.91)             | 0.66 (0.16-2.64) | 0.25 (0.03-1.84)  | 0.67 (0.17-2.62)  | 0.64                    | 1.00                    |
|            |             |            | Female | 0.09 | 403 | 0.68 (0.34-1.33)      | 0.24       | 0.95    | 2.45 (0.84-7.12)             | 0.32 (0.07-1.43) | 0.30 (0.04-2.54)  | 0.41 (0.09-1.86)  | 0.06                    | 0.39                    |
| rs9383321  | CNR1        | 6          | Male   | 0.12 | 386 | 0.66 (0.35-1.23)      | 0.18       | 0.86    | 0.70 (0.18-2.77)             | 0.92 (0.32-2.67) | 0.49 (0.13-1.83)  | 0.54 (0.14-2.09)  | 0.88                    | 0.88                    |
|            |             |            | Female | 0.11 | 403 | 0.84 (0.45-1.57)      | 0.58       | 0.99    | 1.55 (0.48-4.96)             | 0.51 (0.16-1.62) | 0.89 (0.17-4.61)  | 0.82 (0.24-2.79)  | 0.62                    | 0.86                    |
| rs9353524  | CNR1        | 6          | Male   | 0.22 | 384 | 1.13 (0.69-1.86)      | 0.62       | 0.99    | 0.82 (0.25-2.63)             | 1.12 (0.45-2.80) | 0.94 (0.38-2.37)  | 1.90 (0.67-5.40)  | 0.70                    | 0.93                    |
|            |             |            | Female | 0.21 | 403 | 0.74 (0.44-1.26)      | 0.26       | 0.92    | 0.97 (0.34-2.78)             | 1.13 (0.47-2.69) | 0.34 (0.07-1.69)  | 0.48 (0.16-1.38)  | 0.42                    | 0.80                    |
| rs10485171 | CNR1        | 6          | Male   | 0.41 | 385 | 0.99 (0.59-1.65)      | 0.96       | 0.96    | 0.57 (0.19-1.73)             | 1.45 (0.53-3.95) | 0.57 (0.23-1.41)  | 2.73 (0.72-10.41) | 0.14                    | 0.46                    |
|            |             |            | Female | 0.43 | 402 | 1.82 (1.02-3.24)      | 0.04       | 0.35    | 1.70 (0.51-5.66)             | 2.34 (0.86-6.35) | 2.38 (0.47-11.99) | 1.21 (0.42-3.54)  | 0.82                    | 0.82                    |
| rs806365   | CNR1        | 6          | Male   | 0.46 | 385 | 0.75 (0.44-1.28)      | 0.29       | 0.94    | 1.06 (0.30-3.75)             | 2.05 (0.62-6.78) | 2.41 (0.74-8.04)  | 0.01 (0.01-0.21)  | 3.76 × 10 <sup>-4</sup> | 3.86 × 10 <sup>-5</sup> |
|            |             |            | Female | 0.44 | 400 | 0.66 (0.39-1.11)      | 0.12       | 0.71    | 0.30 (0.11-0.87)             | 0.80 (0.33-1.92) | 0.53 (0.14-1.95)  | 1.32 (0.43-4.12)  | 0.27                    | 0.73                    |
| rs7766029  | CNR1        | 6          | Male   | 0.50 | 386 | 1.08 (0.61-1.92)      | 0.79       | 0.99    | 1.42 (0.41-4.92)             | 1.65 (0.49-5.50) | 1.66 (0.50-5.50)  | 0.39 (0.13-1.15)  | 0.21                    | 0.61                    |
|            |             |            | Female | 0.48 | 403 | 0.51 (0.30-0.87)      | 0.02       | 0.18    | 0.28 (0.10-0.80)             | 1.62 (0.46-3.20) | 1.14 (0.04-5.57)  | 0.68 (0.24-1.96)  | 0.04                    | 0.23                    |
| rs806366   | CNR1        | 6          | Male   | 0.49 | 386 | 1.23 (0.69-2.17)      | 0.48       | 0.99    | 1.11 (0.34-3.57)             | 0.76 (0.29-1.99) | 1.30 (0.43-3.92)  | 5.04 (0.62-40.85) | 0.33                    | 0.76                    |
|            |             |            | Female | 0.49 | 402 | 0.75 (0.43-1.31)      | 0.32       | 0.92    | 2.13 (0.57-8.02)             | 0.60 (0.23-1.54) | 0.44 (0.12-1.61)  | 0.61 (0.20-1.84)  | 0.28                    | 0.76                    |
| rs806368   | CNR1        | 6          | Male   | 0.23 | 383 | 1.15 (0.70-1.88)      | 0.57       | 0.99    | 0.81 (0.25-2.59)             | 1.20 (0.48-2.97) | 0.93 (0.37-2.35)  | 1.93 (0.68-5.51)  | 0.68                    | 0.92                    |
|            |             |            | Female | 0.21 | 399 | 0.73 (0.43-1.24)      | 0.24       | 0.90    | 1.23 (0.44-3.45)             | 0.95 (0.39-2.29) | 0.31 (0.06-1.52)  | 0.49 (0.17-1.41)  | 0.37                    | 0.80                    |
| rs1049353  | CNR1        | 6          | Male   | 0.25 | 383 | 0.95 (0.58-1.52)      | 0.84       | 0.96    | 1.03 (0.33-3.18)             | 0.72 (0.29-1.81) | 0.78 (0.32-1.91)  | 1.67 (0.58-4.81)  | 0.64                    | 0.92                    |
|            |             |            | Female | 0.26 | 402 | 0.90 (0.54-1.48)      | 0.67       | 1.00    | 1.87 (0.66-5.30)             | 0.63 (0.27-1.49) | 0.86 (0.23-3.22)  | 0.74 (0.27-2.03)  | 0.43                    | 0.75                    |
| rs806369   | CNR1        | 6          | Male   | 0.31 | 386 | 1.14 (0.78-1.67)      | 0.49       | 0.99    | 2.16 (0.97-4.79)             | 1.31 (0.64-2.71) | 1.68 (0.82-3.42)  | 0.14 (0.03-0.63)  | 7.65 × 10 <sup>-3</sup> | 6.80 × 10 <sup>-3</sup> |
|            |             |            | Female | 0.30 | 403 | 0.78 (0.53-1.16)      | 0.22       | 0.89    | 0.55 (0.23-1.32)             | 0.80 (0.43-1.49) | 0.65 (0.13-3.52)  | 1.42 (0.63-3.22)  | 0.31                    | 0.79                    |
| rs806371   | CNR1        | 6          | Male   | 0.13 | 386 | 1.50 (0.88-2.57)      | 0.14       | 0.80    | 0.59 (0.12-2.92)             | 1.13 (0.40-3.21) | 1.21 (0.45-3.21)  | 4.61 (1.55-13.66) | 0.10                    | 0.38                    |
|            |             |            | Female | 0.13 | 403 | 0.73 (0.39-1.37)      | 0.32       | 0.95    | 1.26 (0.40-3.96)             | 1.36 (0.50-3.71) | NA                | 0.43 (0.12-1.64)  | 0.04                    | 0.21                    |
| rs806374   | CNR1        | 6          | Male   | 0.35 | 386 | 1.29 (0.91-1.82)      | 0.15       | 0.81    | 1.68 (0.76-3.70)             | 0.97 (0.50-1.87) | 1.29 (0.68-2.43)  | 1.49 (0.72-3.05)  | 0.73                    | 0.70                    |
|            |             |            | Female | 0.35 | 401 | 0.84 (0.57-1.23)      | 0.36       | 0.95    | 1.39 (0.64-3.03)             | 0.52 (0.26-1.03) | 0.65 (0.23-1.84)  | 1.11 (0.52-2.37)  | 0.23                    | 0.91                    |
| rs806375   | CNR1        | 6          | Male   | 0.49 | 385 | 0.79 (0.57-1.11)      | 0.17       | 0.84    | 0.46 (0.22-1.00)             | 0.71 (0.39-1.27) | 0.98 (0.52-1.85)  | 1.31 (0.59-2.89)  | 0.25                    | 0.66                    |
|            |             |            | Female | 0.42 | 402 | 1.03 (0.72-1.47)      | 0.88       | 0.88    | 1.13 (0.58-2.22)             | 1.03 (0.54-1.95) | 1.35 (0.56-3.22)  | 0.77 (0.37-1.60)  | 0.79                    | 0.93                    |
| rs806376   | CNR1        | 6          | Male   | 0.47 | 386 | 0.83 (0.59-1.16)      | 0.27       | 0.93    | 0.55 (0.26-1.17)             | 0.72 (0.40-1.31) | 0.88 (0.46-1.69)  | 1.48 (0.69-3.15)  | 0.29                    | 0.72                    |
|            |             |            | Female | 0.47 | 402 | 1.10 (0.77-1.57)      | 0.61       | 0.99    | 1.48 (0.73-3.00)             | 1.20 (0.65-2.20) | 1.22 (0.51-2.93)  | 0.63 (0.29-1.36)  | 0.40                    | 0.79                    |
| rs806377   | CNR1        | 6          | Male   | 0.44 | 386 | 1.26 (0.89-1.76)      | 0.19       | 0.85    | 1.68 (0.79-3.55)             | 1.52 (0.83-2.80) | 1.21 (0.63-2.33)  | 0.73 (0.34-1.55)  | 0.39                    | 0.82                    |
|            |             |            | Female | 0.49 | 402 | 0.94 (0.66-1.33)      | 0.71       | 0.99    | 0.74 (0.37-1.51)             | 0.81 (0.44-1.49) | 0.93 (0.38-2.31)  | 1.44 (0.70-2.97)  | 0.57                    | 0.86                    |
| rs806378   | CNR1        | 6          | Male   | 0.30 | 381 | 0.90 (0.63-1.29)      | 0.56       | 0.99    | 0.58 (0.24-1.39)             | 0.98 (0.52-1.82) | 1.23 (0.63-2.39)  | 0.76 (0.32-1.80)  | 0.56                    | 0.93                    |
|            |             |            | Female | 0.25 | 394 | 0.96 (0.62-1.46)      | 0.83       | 0.99    | 0.66 (0.27-1.63)             | 1.25 (0.59-2.65) | 1.64 (0.64-4.23)  | 0.66 (0.28-1.58)  | 0.38                    | 0.80                    |
| rs2023239  | CNR1        | 6          | Male   | 0.18 | 386 | 0.85 (0.50-1.43)      | 0.54       | 0.99    | 0.66 (0.20-2.11)             | 0.51 (0.18-1.46) | 0.61 (0.22-1.71)  | 2.81 (0.97-8.17)  | 0.10                    | 0.38                    |
|            |             |            | Female | 0.17 | 403 | 1.33 (0.79-2.25)      | 0.29       | 0.93    | 2.99 (1.05-8.53)             | 1.07 (0.44-2.61) | 0                 |                   |                         |                         |

| SNP        | Gene Region | Chromosome | Gender | MAF  | N   | Marginal Effect       |            |                 | Treatment Stratified Effects |                  |                   |                  | Test of Interaction |            |            |            |
|------------|-------------|------------|--------|------|-----|-----------------------|------------|-----------------|------------------------------|------------------|-------------------|------------------|---------------------|------------|------------|------------|
|            |             |            |        |      |     | Likelihood ratio test |            | SNP OR (95% CI) | Placebo                      | Bupropion        | Patch             | Spray            | Observed P          | Adjusted P | Observed P | Adjusted P |
|            |             |            |        |      |     | SNP OR (95% CI)       | Observed P |                 |                              |                  |                   |                  |                     |            |            |            |
| rs10457561 | EPB41L2     | 6          | Female | 0.14 | 386 | 0.88 (0.53-1.46)      | 0.61       | 1.00            | 0.34 (0.08-1.54)             | 1.23 (0.49-3.11) | 0.72 (0.28-1.87)  | 1.41 (0.52-3.82) | 0.33                | 0.84       |            |            |
|            |             |            | Female | 0.17 | 403 | 1.22 (0.76-1.97)      | 0.41       | 0.99            | 1.97 (0.82-4.73)             | 0.91 (0.40-2.09) | 1.94 (0.53-7.16)  | 0.81 (0.29-2.26) | 0.43                | 0.96       |            |            |
| rs6569709  | EPB41L2     | 6          | Male   | 0.31 | 386 | 1.16 (0.82-1.63)      | 0.40       | 1.00            | 0.90 (0.43-1.88)             | 0.67 (0.33-1.36) | 1.89 (0.96-3.70)  | 1.54 (0.77-3.09) | 0.14                | 0.57       |            |            |
|            |             |            | Female | 0.31 | 403 | 1.07 (0.73-1.57)      | 0.74       | 1.00            | 0.67 (0.30-1.50)             | 1.44 (0.76-2.74) | 0.76 (0.26-2.26)  | 1.34 (0.61-2.94) | 0.40                | 0.95       |            |            |
| rs933063   | EPB41L2     | 6          | Male   | 0.30 | 386 | 0.93 (0.65-1.34)      | 0.70       | 1.00            | 0.99 (0.46-2.15)             | 0.96 (0.49-1.90) | 0.72 (0.36-1.46)  | 1.17 (0.54-2.53) | 0.83                | 1.00       |            |            |
|            |             |            | Female | 0.33 | 401 | 0.99 (0.67-1.47)      | 0.97       | 1.00            | 1.45 (0.69-3.03)             | 0.57 (0.28-1.18) | 1.81 (0.75-4.35)  | 0.81 (0.36-1.85) | 0.15                | 0.63       |            |            |
| rs3777432  | EPB41L2     | 6          | Male   | 0.15 | 386 | 0.87 (0.52-1.44)      | 0.57       | 1.00            | 0.34 (0.08-1.54)             | 1.23 (0.49-3.11) | 0.70 (0.28-1.77)  | 1.41 (0.52-3.82) | 0.32                | 0.83       |            |            |
|            |             |            | Female | 0.17 | 403 | 1.28 (0.80-2.06)      | 0.30       | 0.97            | 1.90 (0.79-4.57)             | 0.96 (0.42-2.18) | 1.94 (0.53-7.17)  | 1.00 (0.37-2.65) | 0.59                | 0.98       |            |            |
| rs915172   | EPB41L2     | 6          | Male   | 0.29 | 385 | 1.00 (0.62-1.63)      | 0.99       | 0.99            | 1.20 (0.40-3.58)             | 1.15 (0.47-2.81) | 0.79 (0.32-1.93)  | 0.98 (0.35-2.77) | 0.93                | 1.00       |            |            |
|            |             |            | Female | 0.32 | 403 | 1.01 (0.61-1.67)      | 0.97       | 0.97            | 1.71 (0.59-5.00)             | 0.50 (0.21-1.18) | 2.82 (0.68-11.61) | 0.92 (0.33-2.54) | 0.12                | 0.60       |            |            |
| rs7775013  | EPB41L2     | 6          | Male   | 0.39 | 386 | 0.95 (0.67-1.33)      | 0.75       | 1.00            | 1.16 (0.57-2.37)             | 1.44 (0.75-2.78) | 0.75 (0.40-1.43)  | 0.61 (0.28-1.30) | 0.28                | 0.82       |            |            |
|            |             |            | Female | 0.36 | 403 | 1.02 (0.71-1.48)      | 0.90       | 1.00            | 1.00 (0.45-2.20)             | 1.14 (0.63-2.07) | 0.82 (0.32-2.05)  | 1.04 (0.49-2.20) | 0.95                | 1.00       |            |            |
| rs17059736 | EPB41L2     | 6          | Male   | 0.12 | 386 | 1.13 (0.63-2.02)      | 0.68       | 1.00            | 2.16 (0.64-7.32)             | 1.52 (0.55-4.17) | 0.65 (0.20-2.14)  | 0.74 (0.19-2.89) | 0.45                | 0.90       |            |            |
|            |             |            | Female | 0.14 | 403 | 0.59 (0.32-1.11)      | 0.09       | 0.65            | 0.54 (0.14-2.05)             | 0.19 (0.04-0.86) | 1.93 (0.50-7.50)  | 0.80 (0.27-2.34) | 0.12                | 0.60       |            |            |
| rs3777438  | EPB41L2     | 6          | Male   | 0.17 | 376 | 0.96 (0.56-1.64)      | 0.88       | 1.00            | 1.41 (0.42-4.69)             | 0.99 (0.38-2.57) | 0.94 (0.34-2.56)  | 0.66 (0.19-2.24) | 0.86                | 1.00       |            |            |
|            |             |            | Female | 0.17 | 394 | 1.14 (0.66-1.96)      | 0.65       | 1.00            | 2.00 (0.68-5.87)             | 0.36 (0.11-1.13) | 1.49 (0.39-5.75)  | 1.93 (0.69-5.40) | 0.08                | 0.47       |            |            |
| rs3822859  | EPB41L2     | 6          | Male   | 0.01 | NA  | NA                    | NA         | NA              | NA                           | NA               | NA                | NA               | NA                  | NA         |            |            |
|            |             |            | Female | 0.02 | NA  | NA                    | NA         | NA              | NA                           | NA               | NA                | NA               | NA                  | NA         |            |            |
| rs3798249  | EPB41L2     | 6          | Male   | 0.48 | 385 | 1.11 (0.79-1.56)      | 0.55       | 1.00            | 1.26 (0.60-2.66)             | 0.62 (0.33-1.18) | 1.62 (0.85-3.10)  | 1.30 (0.62-2.74) | 0.19                | 0.70       |            |            |
|            |             |            | Female | 0.49 | 403 | 1.02 (0.72-1.45)      | 0.90       | 1.00            | 0.99 (0.50-1.99)             | 0.90 (0.52-1.57) | 0.79 (0.31-2.05)  | 1.54 (0.73-3.26) | 0.64                | 0.98       |            |            |
| rs2839942  | EPB41L2     | 6          | Male   | 0.31 | 385 | 1.04 (0.64-1.69)      | 0.88       | 1.00            | 0.82 (0.27-2.45)             | 0.52 (0.21-1.28) | 2.14 (0.86-5.31)  | 1.21 (0.43-3.43) | 0.17                | 0.65       |            |            |
|            |             |            | Female | 0.32 | 402 | 1.10 (0.66-1.82)      | 0.72       | 1.00            | 0.74 (0.26-2.10)             | 1.35 (0.57-3.20) | 0.82 (0.23-2.96)  | 1.43 (0.50-4.07) | 0.75                | 0.98       |            |            |
| rs12206057 | EPB41L2     | 6          | Male   | 0.17 | 386 | 0.88 (0.55-1.42)      | 0.60       | 1.00            | 1.34 (0.48-3.69)             | 0.94 (0.42-2.12) | 0.76 (0.29-1.98)  | 0.61 (0.19-1.92) | 0.76                | 0.99       |            |            |
|            |             |            | Female | 0.17 | 403 | 1.12 (0.69-1.80)      | 0.65       | 1.00            | 1.59 (0.67-3.76)             | 0.44 (0.15-1.25) | 1.13 (0.37-3.46)  | 1.91 (0.74-4.94) | 0.15                | 0.65       |            |            |
| rs4897472  | EPB41L2     | 6          | Male   | 0.48 | 386 | 1.08 (0.77-1.52)      | 0.65       | 1.00            | 1.12 (0.54-2.31)             | 0.62 (0.33-1.19) | 1.62 (0.85-3.10)  | 1.30 (0.62-2.74) | 0.20                | 0.69       |            |            |
|            |             |            | Female | 0.49 | 403 | 1.02 (0.72-1.45)      | 0.90       | 1.00            | 0.99 (0.50-1.99)             | 0.90 (0.52-1.57) | 0.79 (0.31-2.05)  | 1.54 (0.73-3.26) | 0.64                | 0.98       |            |            |
| rs4897473  | EPB41L2     | 6          | Male   | 0.36 | 386 | 0.98 (0.69-1.39)      | 0.90       | 1.00            | 1.17 (0.55-2.47)             | 1.58 (0.81-3.06) | 0.72 (0.38-1.39)  | 0.64 (0.28-1.46) | 0.25                | 0.78       |            |            |
|            |             |            | Female | 0.33 | 403 | 0.94 (0.65-1.38)      | 0.77       | 1.00            | 0.89 (0.41-1.93)             | 1.14 (0.62-2.10) | 0.79 (0.29-2.15)  | 0.84 (0.38-1.81) | 0.89                | 1.00       |            |            |
| rs10499177 | EPB41L2     | 6          | Male   | 0.07 | 386 | 0.90 (0.45-1.78)      | 0.76       | 1.00            | 1.73 (0.53-5.69)             | 0.95 (0.29-3.09) | 0.70 (0.14-3.52)  | 0.34 (0.04-2.66) | 0.51                | 0.94       |            |            |
|            |             |            | Female | 0.10 | 403 | 0.96 (0.52-1.79)      | 0.91       | 1.00            | 1.13 (0.36-3.59)             | 0.30 (0.06-1.37) | 1.70 (0.45-6.45)  | 1.48 (0.49-4.52) | 0.25                | 0.80       |            |            |
| rs2068147  | EPB41L2     | 6          | Male   | 0.48 | 386 | 1.08 (0.77-1.52)      | 0.65       | 1.00            | 1.12 (0.55-2.31)             | 0.62 (0.33-1.19) | 1.62 (0.85-3.10)  | 1.30 (0.62-2.74) | 0.20                | 0.69       |            |            |
|            |             |            | Female | 0.49 | 403 | 1.02 (0.72-1.45)      | 0.90       | 1.00            | 0.99 (0.50-1.99)             | 0.90 (0.52-1.57) | 0.79 (0.31-2.05)  | 1.54 (0.73-3.26) | 0.64                | 0.98       |            |            |
| rs3777450  | EPB41L2     | 6          | Male   | 0.03 | NA  | NA                    | NA         | NA              | NA                           | NA               | NA                | NA               | NA                  | NA         |            |            |
|            |             |            | Female | 0.02 | NA  | NA                    | NA         | NA              | NA                           | NA               | NA                | NA               | NA                  | NA         |            |            |
| rs1999474  | EPB41L2     | 6          | Male   | 0.28 | 383 | 1.10 (0.68-1.80)      | 0.70       | 1.00            | 0.62 (0.20-1.99)             | 0.71 (0.29-1.75) | 1.96 (0.79-4.90)  | 1.51 (0.53-4.29) | 0.29                | 0.79       |            |            |
|            |             |            | Female | 0.27 | 403 | 1.16 (0.70-1.91)      | 0.57       | 1.00            | 0.65 (0.22-1.89)             | 1.68 (0.72-3.93) | 0.53 (0.14-2.00)  | 1.85 (0.67-5.10) | 0.25                | 0.80       |            |            |
| rs12528626 | EPB41L2     | 6          | Male   | 0.07 | 386 | 0.90 (0.45-1.78)      | 0.76       | 1.00            | 1.61 (0.49-5.28)             | 0.95 (0.29-3.10) | 0.70 (0.14-3.52)  | 0.37 (0.05-2.88) | 0.60                | 0.98       |            |            |
|            |             |            | Female | 0.09 | 403 | 0.91 (0.48-1.73)      | 0.78       | 1.00            | 1.19 (0.37-3.80)             | 0.14 (0.02-1.12) | 2.14 (0.48-9.52)  | 1.49 (0.49-4.53) | 0.07                | 0.42       |            |            |
| rs3777457  | EPB41L2     | 6          | Male   | 0.17 | 386 | 0.98 (0.58-1.65)      | 0.93       | 1.00            | 1.54 (0.49-4.80)             | 1.13 (0.45-2.87) | 0.79 (0.29-2.13)  | 0.66 (0.19-2.26) | 0.74                | 0.99       |            |            |
|            |             |            | Female | 0.17 | 403 | 1.03 (0.60-1.76)      | 0.92       | 1.00            | 1.82 (0.62-5.29)             | 0.32 (0.10-1.00) | 1.50 (0.39-5.73)  | 1.65 (0.61-4.50) | 0.07                | 0.44       |            |            |
| rs7766004  | EPB41L2     | 6          | Male   | 0.28 | 386 | 1.11 (0.68-1.81)      | 0.67       | 1.00            | 0.62 (0.20-1.99)             | 0.71 (0.29-1.75) | 2.03 (0.83-5.01)  | 1.45 (0.51-4.11) | 0.27                | 0.80       |            |            |
|            |             |            | Female | 0.27 | 403 | 1.18 (0.71-1.94)      | 0.52       | 1.00            | 0.67 (0.23-1.96)             | 1.68 (0.72-3.93) | 0.57 (0.15-2.13)  | 1.85 (0.67-5.10) | 0.29                | 0.84       |            |            |
| rs3822864  | EPB41L2     | 6          | Male   | 0.03 | NA  | NA                    | NA         | NA              | NA                           | NA               | NA                | NA               | NA                  | NA         |            |            |
|            |             |            | Female | 0.02 | NA  | NA                    | NA         | NA              | NA                           | NA               | NA                | NA               | NA                  | NA         |            |            |
| rs9321260  | EPB41L2     | 6          | Male   | 0.18 | 386 | 0.96 (0.58-1.62)      | 0.89       | 1.00            | 1.97 (0.64-6.00)             | 0.99 (0.39-2.49) | 0.80 (0.30-2.15)  | 0.58 (0.17-1.96) | 0.50                | 0.93       |            |            |
|            |             |            | Female | 0.19 | 403 | 1.01 (0.60-1.71)      | 0.96       | 1.00            | 1.62 (0.56-4.70)             | 0.45 (0.17-1.22) | 1.29 (0.34-4.91)  | 1.50 (0.55-4.07) | 0.24                | 0.79       |            |            |
| rs3777463  | EPB41L2     | 6          | Male   | 0.03 | NA  | NA                    | NA         | NA              | NA                           | NA               | NA                | NA               | NA                  | NA         |            |            |
|            |             |            | Female | 0.02 | NA  | NA                    | NA         | NA              | NA                           | NA               | NA                | NA               | NA                  | NA         |            |            |
| rs3777464  | EPB41L2     | 6          | Male   | 0.08 | 386 | 0.82 (0.43-1.57)      | 0.54       | 1.00            | 1.90 (0.62-5.84)             | 0.69 (0.23-2.10) | 0.64 (0.13-3.14)  | 0.32 (0.04-2.52) | 0.36                | 0.86       |            |            |
|            |             |            | Female | 0.11 | 403 | 0.88 (0.49-1.58)      | 0.66       | 1.00            | 1.11 (0.35-3.54)             | 0.25 (0.06-1.10) | 2.09 (0.60-7.23)  | 1.16 (0.41-3.25) | 0.12                | 0.61       |            |            |
| rs3777466  | EPB41L2     | 6          | Male   | 0.46 | 386 | 1.13 (0.80-1.59)      | 0.50       | 1.00            | 1.11 (0.54-2.28)             | 0.71 (0.37-1.36) | 1.56 (0.81-3.02)  | 1.37 (0.65-2.90) | 0.37                | 0.86       |            |            |
|            |             |            | Female | 0.46 | 403 | 1.07 (0.75-1.52)      | 0.71       | 1.00            | 0.95 (0.46-1.94)             | 0.92 (0.52-1.61) | 0.71 (0.27-1.90)  | 2.03 (0.94-4.40) | 0.28                | 0.83       |            |            |
| rs9492767  | EPB41L2     | 6          | Male   | 0.17 | 384 | 1.04 (0.62-1.77)      | 0.87       | 1.00            | 1.14 (0.37-3.53)             | 0.84 (0.32-2.22) | 0.94 (0.34-2.55)  | 1.48 (0.49-4.50) | 0.89                | 1.00       |            |            |
|            |             |            | Female | 0.19 | 401 | 1.25 (0.74-2.09)      | 0.41       | 0.99            | 1.01 (0.35-2.86)             | 1.06 (0.44-2.56) | 2.99 (0.81-11.05) | 1.12 (0.39-3.22) | 0.56                | 0.98       |            |            |
| rs9375785  | EPB41L2     | 6          | Male   | 0.16 | 386 | 0.83 (0.51-1.37)      | 0.46       | 1.00            | 0.53 (0.15-1.86)             | 1.04 (0.41-2.62) | 0.67 (0.28-1.62)  | 1.28 (0.45-3.67) | 0.65                | 0.98       |            |            |
|            |             |            | Female | 0.18 | 402 | 1.12 (0.70-1.79)      | 0.65       | 1.00            | 1.19 (0.48-2.93)             | 1.15 (0.53-2.48) | 1.97 (0.64-6.03)  | 0.58 (0.18-1.87) | 0.51                | 0.98       |            |            |
| rs2297853  | EPB41L2     | 6          | Male   | 0.34 | 386 | 0.82 (0.50-1.33)      | 0.41       | 1.00            | 1.18 (0.39-3.54)             | 1.02 (0.41-2.51) | 0.56 (0.23-1.37)  | 0.72 (0.26-2.05) | 0.70                | 0.98       |            |            |
|            |             |            | Female | 0.36 | 401 | 1.12 (0.67-1.87)      | 0.67       | 1.00            | 2.06 (0.67-6.30)             | 0.52 (0.22-1.21) | 2.24 (0.54-9.28)  | 1.33 (0.46-3.88) | 0.14                | 0.65       |            |            |
| rs6941712  | EPB41L2     | 6          | Male   | 0.11 | 386 | 0.78 (0.44-1.40)      | 0.40       | 1.00            | 1.74 (0.63-4.75)             | 0.56 (0.20-1.59) | 0.65 (0.17-2.46)  | 0.49 (0.11-2.25) | 0.37                | 0.83       |            |            |
|            |             |            | Female | 0.13 | 403 | 1.02 (0.59-1.74)      | 0.95       | 1.00            | 1.22 (0.41-3.60)             | 0.34 (0.10-1.22) | 2.30 (0.69-7.61)  | 1.32 (0.51-3.41) | 0.13                | 0.64       |            |            |
| rs2105250  | EPB41L2     | 6          | Male   | 0.28 | 385 | 1.15 (0.71-1.88)      | 0.57       | 1.00            | 0.62 (0.20-1.99)             | 0.71 (0.29-1.75) | 2.45 (0.97-6.16)  | 1.39 (0.49-3.93) | 0.17                | 0.67       |            |            |
|            |             |            | Female | 0.27 | 402 | 1.06 (0.64-1.75)      | 0.83       | 1.00            | 0.54 (0.18-1.67)             | 1.47 (0.63-3.41) | 0.53 (0.14-2.00)  | 1.77 (0.64-4.88) | 0.25                | 0.79       |            |            |
| rs2095961  | EPB41L2     | 6          | Male   | 0.34 | 386 | 0.82 (0.50-1.33)      | 0.42       | 1.00            | 1.12 (0.37-3.37)             | 1.02 (0.41-2.51) | 0.59 (0.24-1.45)  | 0.72 (0.26-2.05) | 0.77                | 0.99       |            |            |
|            |             |            | Female | 0.36 | 403 | 1.08 (0.65-1.82)      | 0.76       | 1.00            | 2.05 (0.67-6.29)             | 0.47 (0.20-1.11) | 2.25 (0.54-9.30)  | 1.33 (0.46-3.87) | 0.11                | 0.57       |            |            |
| rs12527605 | EPB41L2     |            |        |      |     |                       |            |                 |                              |                  |                   |                  |                     |            |            |            |

| SNP        | Gene Region | Chromosome | Gender | MAF                     | N   | Marginal Effect       |            |         | Treatment Stratified Effects |                   |                   |                  | Test of Interaction |            |            |
|------------|-------------|------------|--------|-------------------------|-----|-----------------------|------------|---------|------------------------------|-------------------|-------------------|------------------|---------------------|------------|------------|
|            |             |            |        |                         |     | Likelihood ratio test |            | Placebo | Bupropion                    |                   | Patch             |                  | Spray               | Observed P | Adjusted P |
|            |             |            |        |                         |     | SNP OR (95% CI)       | Observed P |         | Adjusted P                   | SNP OR (95% CI)   | SNP OR (95% CI)   | SNP OR (95% CI)  |                     |            |            |
| rs563649   | OPRM1       | 6          | Male   | 0.10                    | 386 | 0.98 (0.55-1.73)      | 0.94       | 0.94    | 0.61 (0.15-2.45)             | 2.13 (0.83-5.47)  | 1.04 (0.33-3.31)  | 0.34 (0.07-1.61) | 0.16                | 0.78       |            |
|            |             |            | Female | 0.08                    | 403 | 0.98 (0.48-1.99)      | 0.96       | 1.00    | 0.44 (0.09-2.08)             | 0.40 (0.08-1.89)  | 2.41 (0.53-10.88) | 2.59 (0.74-9.05) | 0.11                | 0.58       |            |
| rs9322446  | OPRM1       | 6          | Male   | 0.14                    | 385 | 1.09 (0.66-1.81)      | 0.74       | 1.00    | 0.97 (0.30-3.16)             | 1.45 (0.63-3.37)  | 1.08 (0.40-2.97)  | 0.75 (0.24-2.37) | 0.82                | 1.00       |            |
|            |             |            | Female | 0.16                    | 403 | 1.09 (0.67-1.75)      | 0.74       | 1.00    | 1.26 (0.55-2.86)             | 1.11 (0.49-2.54)  | 1.36 (0.44-4.46)  | 0.65 (0.20-2.12) | 0.79                | 1.00       |            |
| rs9479757  | OPRM1       | 6          | Male   | 0.10                    | 385 | 0.79 (0.43-1.45)      | 0.43       | 0.99    | 1.28 (0.45-3.65)             | 1.01 (0.37-2.78)  | 0.40 (0.08-1.89)  | 0.32 (0.04-2.56) | 0.43                | 0.97       |            |
|            |             |            | Female | 0.09                    | 403 | 0.72 (0.37-1.40)      | 0.32       | 0.97    | 1.22 (0.39-3.82)             | 0.31 (0.07-1.42)  | 1.11 (0.27-4.55)  | 0.64 (0.18-2.34) | 0.47                | 0.98       |            |
| rs2075572  | OPRM1       | 6          | Male   | 0.45                    | 386 | 0.87 (0.62-1.22)      | 0.41       | 0.99    | 0.98 (0.47-2.07)             | 0.93 (0.49-1.77)  | 1.13 (0.61-2.12)  | 0.46 (0.21-1.04) | 0.34                | 0.92       |            |
|            |             |            | Female | 0.40                    | 403 | 0.69 (0.47-1.01)      | 0.05       | 0.50    | 0.80 (0.38-1.69)             | 0.53 (0.28-1.00)  | 0.71 (0.25-2.05)  | 0.88 (0.41-1.87) | 0.75                | 1.00       |            |
| rs510587   | OPRM1       | 6          | Male   | 0.05                    | 386 | 1.06 (0.49-2.29)      | 0.88       | 1.00    | NA                           | 1.15 (0.21-6.45)  | 1.87 (0.61-5.69)  | 1.00 (0.20-5.15) | 0.18                | 0.82       |            |
|            |             |            | Female | 0.05                    | 403 | 1.28 (0.62-2.65)      | 0.51       | 0.99    | 4.13 (1.20-14.22)            | 0.49 (0.11-2.15)  | 0.88 (0.10-8.03)  | 1.23 (0.23-7.60) | 0.14                | 0.64       |            |
| rs9282821  | OPRM1       | 6          | Male   | 0.44                    | 386 | 0.86 (0.51-1.43)      | 0.56       | 1.00    | 1.32 (0.38-4.56)             | 0.77 (0.29-2.03)  | 1.13 (0.44-2.88)  | 0.48 (0.16-1.39) | 0.57                | 0.99       |            |
|            |             |            | Female | 0.39                    | 403 | 0.59 (0.35-0.98)      | 0.04       | 0.43    | 0.65 (0.23-1.83)             | 0.44 (0.19-1.04)  | 0.87 (0.23-3.30)  | 0.63 (0.23-1.74) | 0.84                | 1.00       |            |
| rs540825   | OPRM1       | 6          | Male   | 0.26                    | 386 | 0.89 (0.60-1.32)      | 0.56       | 1.00    | 0.79 (0.31-1.97)             | 0.73 (0.36-1.48)  | 1.29 (0.66-2.54)  | 0.74 (0.28-1.96) | 0.64                | 0.99       |            |
|            |             |            | Female | 0.24                    | 403 | 0.76 (0.49-1.17)      | 0.21       | 0.92    | 0.96 (0.38-2.43)             | 0.75 (0.39-1.48)  | 0.47 (0.13-1.79)  | 0.79 (0.34-1.83) | 0.86                | 1.00       |            |
| rs548646   | OPRM1       | 6          | Male   | 0.35                    | 385 | 0.79 (0.49-1.29)      | 0.36       | 0.99    | 0.97 (0.32-3.00)             | 0.56 (0.23-1.39)  | 1.08 (0.44-2.68)  | 0.70 (0.24-2.02) | 0.75                | 1.00       |            |
|            |             |            | Female | 0.33                    | 403 | 0.70 (0.42-1.15)      | 0.16       | 0.85    | 1.02 (0.37-2.85)             | 0.67 (0.29-1.55)  | 0.66 (0.18-2.39)  | 0.53 (0.20-1.45) | 0.85                | 1.00       |            |
| rs3798683  | OPRM1       | 6          | Male   | 0.14                    | 386 | 0.76 (0.46-1.27)      | 0.28       | 0.97    | 0.38 (0.11-1.38)             | 0.49 (0.16-1.51)  | 1.04 (0.45-2.40)  | 1.47 (0.49-4.52) | 0.30                | 0.91       |            |
|            |             |            | Female | 0.16                    | 403 | 1.44 (0.90-2.29)      | 0.13       | 0.81    | 1.47 (0.54-4.02)             | 1.77 (0.85-3.68)  | 2.30 (0.70-7.49)  | 0.67 (0.22-2.08) | 0.41                | 0.97       |            |
| rs599548   | OPRM1       | 6          | Male   | 0.13                    | 385 | 1.19 (0.72-1.97)      | 0.49       | 1.00    | 0.95 (0.31-2.92)             | 1.68 (0.71-4.01)  | 1.63 (0.60-4.43)  | 0.62 (0.19-1.99) | 0.48                | 0.98       |            |
|            |             |            | Female | 0.13                    | 403 | 0.82 (0.47-1.44)      | 0.48       | 0.99    | 0.29 (0.06-1.37)             | 1.24 (0.53-2.90)  | 0.71 (0.14-3.60)  | 0.91 (0.32-2.61) | 0.38                | 0.97       |            |
| rs9322447  | OPRM1       | 6          | Male   | 0.49                    | 386 | 0.96 (0.68-1.36)      | 0.83       | 1.00    | 0.96 (0.45-2.05)             | 1.05 (0.54-2.02)  | 1.36 (0.72-2.55)  | 0.50 (0.22-1.13) | 0.27                | 0.91       |            |
|            |             |            | Female | 0.46                    | 403 | 0.69 (0.48-0.99)      | 0.04       | 0.42    | 0.73 (0.34-1.56)             | 0.72 (0.40-1.31)  | 0.57 (0.21-1.55)  | 0.67 (0.33-1.35) | 0.98                | 0.98       |            |
| rs618207   | OPRM1       | 6          | Male   | 0.35                    | 385 | 0.83 (0.51-1.36)      | 0.47       | 1.00    | 0.98 (0.32-3.00)             | 0.66 (0.27-1.63)  | 1.08 (0.44-2.68)  | 0.70 (0.24-2.02) | 0.86                | 1.00       |            |
|            |             |            | Female | 0.33                    | 403 | 0.68 (0.41-1.13)      | 0.14       | 0.81    | 1.02 (0.37-2.86)             | 0.67 (0.29-1.55)  | 0.66 (0.18-2.40)  | 0.49 (0.18-1.35) | 0.80                | 1.00       |            |
| rs1853384  | OPRM1       | 6          | Male   | 0.35                    | 386 | 0.83 (0.51-1.35)      | 0.45       | 1.00    | 0.98 (0.32-3.00)             | 0.66 (0.27-1.63)  | 1.08 (0.44-2.68)  | 0.68 (0.23-1.95) | 0.85                | 1.00       |            |
|            |             |            | Female | 0.33                    | 403 | 0.68 (0.41-1.13)      | 0.14       | 0.81    | 1.02 (0.37-2.86)             | 0.67 (0.29-1.55)  | 0.66 (0.18-2.40)  | 0.49 (0.18-1.35) | 0.80                | 1.00       |            |
| rs623956   | OPRM1       | 6          | Male   | 0.25                    | 366 | 0.95 (0.64-1.41)      | 0.81       | 1.00    | 0.98 (0.37-2.59)             | 0.73 (0.36-1.49)  | 1.32 (0.67-2.60)  | 0.82 (0.31-2.15) | 0.67                | 0.99       |            |
|            |             |            | Female | 0.24                    | 382 | 0.77 (0.49-1.19)      | 0.23       | 0.93    | 0.87 (0.34-2.23)             | 0.82 (0.41-1.68)  | 0.53 (0.14-1.97)  | 0.74 (0.32-1.72) | 0.93                | 1.00       |            |
| rs504932   | OPRM1       | 6          | Male   | 0.25                    | 385 | 0.95 (0.65-1.40)      | 0.81       | 1.00    | 0.81 (0.33-2.03)             | 0.85 (0.43-1.69)  | 1.33 (0.68-2.60)  | 0.76 (0.29-2.01) | 0.71                | 1.00       |            |
|            |             |            | Female | 0.24                    | 402 | 0.77 (0.50-1.19)      | 0.23       | 0.93    | 0.95 (0.38-2.41)             | 0.79 (0.40-1.56)  | 0.50 (0.13-1.88)  | 0.76 (0.32-1.76) | 0.89                | 1.00       |            |
| rs609148   | OPRM1       | 6          | Male   | 0.25                    | 385 | 0.96 (0.65-1.40)      | 0.82       | 1.00    | 0.81 (0.33-2.03)             | 0.85 (0.43-1.70)  | 1.32 (0.68-2.59)  | 0.77 (0.29-2.02) | 0.72                | 1.00       |            |
|            |             |            | Female | 0.24                    | 403 | 0.77 (0.50-1.19)      | 0.23       | 0.94    | 0.96 (0.38-2.43)             | 0.79 (0.40-1.56)  | 0.50 (0.13-1.89)  | 0.75 (0.32-1.75) | 0.88                | 1.00       |            |
| rs606148   | OPRM1       | 6          | Male   | 0.10                    | 386 | 0.82 (0.45-1.50)      | 0.51       | 1.00    | 1.39 (0.46-4.20)             | 0.88 (0.32-2.42)  | 0.67 (0.17-2.59)  | 0.30 (0.04-2.36) | 0.54                | 0.99       |            |
|            |             |            | Female | 0.09                    | 403 | 0.71 (0.36-1.38)      | 0.29       | 0.96    | 1.32 (0.42-4.17)             | 0.31 (0.07-1.42)  | 1.00 (0.24-4.21)  | 0.60 (0.16-2.17) | 0.44                | 0.97       |            |
| rs632395   | OPRM1       | 6          | Male   | 0.10                    | 386 | 0.80 (0.44-1.46)      | 0.46       | 1.00    | 1.28 (0.45-3.65)             | 0.88 (0.32-2.42)  | 0.63 (0.16-2.40)  | 0.30 (0.04-2.36) | 0.56                | 0.99       |            |
|            |             |            | Female | 0.09                    | 403 | 0.71 (0.36-1.38)      | 0.29       | 0.96    | 1.32 (0.42-4.17)             | 0.31 (0.07-1.42)  | 1.00 (0.24-4.21)  | 0.60 (0.16-2.17) | 0.44                | 0.97       |            |
| rs648893   | OPRM1       | 6          | Male   | 0.25                    | 384 | 0.98 (0.66-1.43)      | 0.90       | 0.99    | 0.83 (0.33-2.06)             | 0.88 (0.44-1.77)  | 1.33 (0.68-2.60)  | 0.79 (0.30-2.07) | 0.75                | 1.00       |            |
|            |             |            | Female | 0.24                    | 403 | 0.77 (0.50-1.19)      | 0.23       | 0.94    | 0.96 (0.38-2.43)             | 0.79 (0.40-1.56)  | 0.50 (0.13-1.89)  | 0.75 (0.32-1.75) | 0.88                | 1.00       |            |
| rs1323041  | OPRM1       | 6          | Male   | 0.49                    | 385 | 0.97 (0.69-1.37)      | 0.87       | 1.00    | 0.96 (0.45-2.05)             | 1.08 (0.56-2.07)  | 1.36 (0.72-2.54)  | 0.50 (0.22-1.13) | 0.27                | 0.92       |            |
|            |             |            | Female | 0.46                    | 403 | 0.69 (0.48-0.99)      | 0.04       | 0.42    | 0.73 (0.34-1.56)             | 0.72 (0.40-1.31)  | 0.57 (0.21-1.55)  | 0.67 (0.33-1.35) | 0.98                | 0.98       |            |
| rs512053   | OPRM1       | 6          | Male   | 0.08                    | 386 | 1.42 (0.79-2.58)      | 0.25       | 0.96    | 1.57 (0.42-5.81)             | 1.49 (0.56-3.98)  | 1.84 (0.55-6.14)  | 0.89 (0.32-2.54) | 0.88                | 0.88       |            |
|            |             |            | Female | 0.09                    | 403 | 0.82 (0.41-1.62)      | 0.56       | 0.99    | 0.50 (0.10-2.40)             | 1.49 (0.51-4.34)  | 0.50 (0.06-2.46)  | 0.67 (0.17-2.57) | 0.60                | 1.00       |            |
| rs642489   | OPRM1       | 6          | Male   | 0.25                    | 386 | 0.96 (0.65-1.41)      | 0.83       | 1.00    | 0.81 (0.33-2.03)             | 0.85 (0.43-1.70)  | 1.32 (0.68-2.59)  | 0.78 (0.30-2.06) | 0.73                | 1.00       |            |
|            |             |            | Female | 0.24                    | 403 | 0.77 (0.50-1.19)      | 0.23       | 0.94    | 0.96 (0.38-2.43)             | 0.79 (0.40-1.56)  | 0.50 (0.13-1.89)  | 0.75 (0.32-1.75) | 0.88                | 1.00       |            |
| rs613341   | OPRM1       | 6          | Male   | 0.09                    | 385 | 0.91 (0.50-1.68)      | 0.77       | 1.00    | 1.47 (0.49-4.46)             | 0.93 (0.34-2.55)  | 0.97 (0.24-3.86)  | 0.30 (0.04-2.36) | 0.53                | 0.99       |            |
|            |             |            | Female | 0.09                    | 403 | 0.69 (0.34-1.38)      | 0.27       | 0.95    | 1.32 (0.42-4.17)             | 0.16 (0.02-1.26)  | 1.00 (0.24-4.21)  | 0.68 (0.19-2.50) | 0.24                | 0.84       |            |
| rs10485058 | OPRM1       | 6          | Male   | 0.14                    | 385 | 1.13 (0.68-1.87)      | 0.64       | 1.00    | 0.78 (0.20-3.08)             | 1.41 (0.55-3.65)  | 1.27 (0.53-3.09)  | 0.95 (0.32-2.59) | 0.88                | 0.98       |            |
|            |             |            | Female | 0.15                    | 401 | 0.92 (0.55-1.52)      | 0.73       | 1.00    | 1.11 (0.47-2.65)             | 0.86 (0.37-2.01)  | 0.96 (0.23-4.04)  | 0.72 (0.22-2.33) | 0.94                | 1.00       |            |
| rs613355   | OPRM1       | 6          | Male   | 0.36                    | 386 | 0.78 (0.48-1.28)      | 0.33       | 0.98    | 0.98 (0.32-3.00)             | 0.72 (0.29-1.76)  | 1.03 (0.42-2.55)  | 0.49 (0.17-1.44) | 0.73                | 1.00       |            |
|            |             |            | Female | 0.33                    | 403 | 0.66 (0.40-1.09)      | 0.11       | 0.74    | 1.02 (0.37-2.86)             | 0.61 (0.26-1.42)  | 0.66 (0.18-2.40)  | 0.49 (0.18-1.35) | 0.79                | 1.00       |            |
| rs3735275  | DDC         | 7          | Male   | 0.15                    | 386 | 1.45 (0.93-2.25)      | 0.10       | 0.60    | 1.21 (0.46-3.23)             | 0.96 (0.39-2.34)  | 1.21 (0.55-2.67)  | 3.47 (1.40-8.61) | 0.19                | 0.80       |            |
|            |             |            | Female | 0.19                    | 403 | 1.28 (0.83-1.97)      | 0.28       | 0.96    | 1.50 (0.60-3.74)             | 1.47 (0.70-3.06)  | 1.23 (0.39-3.88)  | 0.97 (0.43-2.22) | 0.88                | 1.00       |            |
| rs947510   | DDC         | 7          | Male   | 0.27                    | 386 | 1.37 (0.95-1.97)      | 0.09       | 0.58    | 1.38 (0.63-3.00)             | 1.37 (0.68-2.74)  | 0.78 (0.38-1.60)  | 2.82 (1.27-6.24) | 0.12                | 0.65       |            |
|            |             |            | Female | 0.32                    | 403 | 1.06 (0.73-1.53)      | 0.77       | 1.00    | 0.83 (0.39-1.77)             | 1.17 (0.62-2.18)  | 1.48 (0.58-3.82)  | 0.96 (0.46-1.96) | 0.79                | 1.00       |            |
| rs947511   | DDC         | 7          | Male   | 5.08 × 10 <sup>-3</sup> | NA  | NA                    | NA         | NA      | NA                           | NA                | NA                | NA               | NA                  | NA         |            |
|            |             |            | Female | 4.95 × 10 <sup>-3</sup> | NA  | NA                    | NA         | NA      | NA                           | NA                | NA                | NA               | NA                  | NA         |            |
| rs11575553 | DDC         | 7          | Male   | 0.10                    | 386 | 1.40 (0.77-2.55)      | 0.28       | 0.84    | 1.42 (0.39-5.17)             | 4.25 (1.30-13.86) | 0.41 (0.09-1.93)  | 1.20 (0.38-3.84) | 0.09                | 0.55       |            |
|            |             |            | Female | 0.11                    | 403 | 0.99 (0.53-1.84)      | 0.97       | 1.00    | 0.55 (0.15-2.07)             | 1.08 (0.38-3.08)  | 1.43 (0.33-6.18)  | 1.24 (0.35-4.41) | 0.75                | 1.00       |            |
| rs947535   | DDC         | 7          | Male   | 0.27                    | 386 | 1.22 (0.85-1.76)      | 0.29       | 0.83    | 1.48 (0.64-3.41)             | 0.84 (0.40-1.75)  | 1.06 (0.55-2.04)  | 1.94 (0.91-4.12) | 0.42                | 0.97       |            |
|            |             |            | Female | 0.30                    | 403 | 1.23 (0.85-1.77)      | 0.27       | 0.95    | 1.03 (0.48-2.20)             | 1.33 (0.71-2.49)  | 1.01 (0.35-2.86)  | 1.41 (0.72-2.74) | 0.90                | 0.99       |            |
| rs730092   | DDC         | 7          | Male   | 0.40                    | 385 | 1.27 (0.90-1.77)      | 0.17       | 0.76    | 1.60 (0.77-3.35)             | 1.19 (0.63-2.23)  | 0.82 (0.44-1.54)  | 2.02 (0.95-4.31) | 0.29                | 0.90       |            |
|            |             |            | Female | 0.45                    | 401 | 1.09 (0.77-1.54)      | 0.64       | 1.00    | 0.70 (0.34-1.46)             | 1.20 (0.66-2.19)  | 1.19 (0.45-3.17)  | 1.32 (0.69-2.51) | 0.60                | 1.00       |            |
| rs11238131 | DDC         | 7          | Male   | 0.27                    | 386 | 1.22 (0.85-1.76)      | 0.29       | 0.83    | 1.48 (0.64-3.4               |                   |                   |                  |                     |            |            |

| SNP        | Gene Region | Chromosome | Gender | MAF  | N   | Marginal Effect       |            |         | Treatment Stratified Effects |                   |                   |                   | Test of Interaction |            |            |
|------------|-------------|------------|--------|------|-----|-----------------------|------------|---------|------------------------------|-------------------|-------------------|-------------------|---------------------|------------|------------|
|            |             |            |        |      |     | Likelihood ratio test |            | Placebo | Bupropion                    | Patch             | Spray             | Observed P        | Adjusted P          | Observed P | Adjusted P |
|            |             |            |        |      |     | SNP OR (95% CI)       | Observed P |         |                              |                   |                   |                   |                     |            |            |
| rs1817074  | DDC         | 7          | Male   | 0.36 | 386 | 1.59 (0.95-2.65)      | 0.07       | 0.55    | 1.86 (0.54-6.38)             | 2.16 (0.84-5.52)  | 1.17 (0.46-2.97)  | 1.38 (0.46-4.08)  | 0.82                | 0.99       |            |
|            |             |            | Female | 0.38 | 403 | 1.35 (0.80-2.29)      | 0.26       | 0.95    | 0.76 (0.27-2.19)             | 1.47 (0.61-3.52)  | 0.69 (0.19-2.50)  | 3.39 (1.03-11.13) | 0.19                | 0.69       |            |
| rs17635123 | DDC         | 7          | Male   | 0.12 | 386 | 1.46 (0.83-2.57)      | 0.20       | 0.77    | 1.99 (0.62-6.36)             | 3.54 (1.13-11.12) | 0.61 (0.18-2.05)  | 1.12 (0.35-3.56)  | 0.17                | 0.76       |            |
|            |             |            | Female | 0.14 | 403 | 1.21 (0.68-2.15)      | 0.52       | 1.00    | 0.69 (0.21-2.31)             | 1.33 (0.49-3.66)  | 1.25 (0.33-4.80)  | 1.83 (0.59-5.65)  | 0.70                | 1.00       |            |
| rs1470750  | DDC         | 7          | Male   | 0.43 | 386 | 0.53 (0.32-0.87)      | 0.01       | 0.17    | 0.48 (0.16-1.49)             | 0.48 (0.19-1.22)  | 0.91 (0.36-2.29)  | 0.31 (0.11-0.90)  | 0.49                | 0.98       |            |
|            |             |            | Female | 0.39 | 403 | 0.95 (0.57-1.58)      | 0.84       | 1.00    | 1.70 (0.55-5.21)             | 0.82 (0.34-1.96)  | 3.04 (0.60-15.32) | 0.39 (0.14-1.07)  | 0.09                | 0.51       |            |
| rs2100280  | DDC         | 7          | Male   | 0.25 | 376 | 1.28 (0.87-1.88)      | 0.22       | 0.80    | 0.85 (0.31-2.30)             | 2.61 (1.21-5.64)  | 0.67 (0.30-1.48)  | 1.47 (0.73-2.98)  | 0.07                | 0.49       |            |
|            |             |            | Female | 0.27 | 398 | 1.00 (0.68-1.47)      | 1.00       | 1.00    | 0.86 (0.41-1.84)             | 0.90 (0.43-1.87)  | 0.45 (0.14-1.41)  | 1.84 (0.91-3.72)  | 0.15                | 0.65       |            |
| rs1451368  | DDC         | 7          | Male   | 0.26 | 386 | 1.37 (0.95-1.97)      | 0.10       | 0.59    | 1.09 (0.43-2.74)             | 2.51 (1.23-5.10)  | 0.78 (0.38-1.61)  | 1.47 (0.73-2.98)  | 0.13                | 0.67       |            |
|            |             |            | Female | 0.28 | 403 | 1.02 (0.69-1.49)      | 0.93       | 1.00    | 0.85 (0.40-1.84)             | 0.82 (0.40-1.70)  | 0.44 (0.14-1.43)  | 2.01 (1.02-3.98)  | 0.09                | 0.51       |            |
| rs10244632 | DDC         | 7          | Male   | 0.27 | 372 | 1.29 (0.90-1.86)      | 0.17       | 0.76    | 1.18 (0.48-2.91)             | 2.09 (1.07-4.08)  | 0.71 (0.34-1.50)  | 1.40 (0.69-2.86)  | 0.19                | 0.79       |            |
|            |             |            | Female | 0.30 | 385 | 0.95 (0.65-1.39)      | 0.79       | 1.00    | 0.73 (0.34-1.58)             | 0.75 (0.36-1.57)  | 0.57 (0.19-1.67)  | 1.86 (0.93-3.71)  | 0.14                | 0.63       |            |
| rs11575321 | DDC         | 7          | Male   | 0.10 | 386 | 1.36 (0.75-2.48)      | 0.32       | 0.87    | 1.63 (0.45-5.96)             | 2.97 (0.92-9.56)  | 0.44 (0.12-1.68)  | 1.65 (0.50-5.39)  | 0.16                | 0.74       |            |
|            |             |            | Female | 0.12 | 403 | 1.17 (0.63-2.16)      | 0.63       | 1.00    | 0.86 (0.26-2.91)             | 0.90 (0.27-3.03)  | 0.93 (0.22-3.89)  | 2.44 (0.77-7.76)  | 0.56                | 1.00       |            |
| rs11575313 | DDC         | 7          | Male   | 0.10 | 385 | 1.40 (0.77-2.56)      | 0.28       | 0.84    | 1.63 (0.45-5.96)             | 2.96 (0.92-9.56)  | 0.49 (0.13-1.85)  | 1.66 (0.51-5.42)  | 0.21                | 0.81       |            |
|            |             |            | Female | 0.12 | 403 | 1.17 (0.63-2.16)      | 0.63       | 1.00    | 0.86 (0.26-2.91)             | 0.90 (0.27-3.03)  | 0.93 (0.22-3.89)  | 2.44 (0.77-7.76)  | 0.56                | 1.00       |            |
| rs10268819 | DDC         | 7          | Male   | 0.14 | 347 | 1.45 (0.85-2.48)      | 0.18       | 0.76    | 1.00 (0.27-3.72)             | 2.91 (1.00-8.53)  | 1.33 (0.54-3.28)  | 1.02 (0.31-3.41)  | 0.51                | 0.99       |            |
|            |             |            | Female | 0.13 | 372 | 1.11 (0.65-1.88)      | 0.70       | 1.00    | 1.41 (0.47-4.24)             | 1.02 (0.41-2.53)  | NA                | 1.69 (0.69-4.43)  | 0.10                | 0.51       |            |
| rs3807552  | DDC         | 7          | Male   | 0.20 | 341 | 1.52 (0.96-2.40)      | 0.08       | 0.54    | 1.73 (0.51-5.87)             | 1.23 (0.49-3.09)  | 1.39 (0.62-3.12)  | 1.88 (0.80-4.43)  | 0.91                | 0.99       |            |
|            |             |            | Female | 0.21 | 369 | 1.19 (0.76-1.86)      | 0.45       | 0.99    | 1.91 (0.75-4.86)             | 1.15 (0.55-2.39)  | 1.17 (0.36-3.86)  | 0.84 (0.34-2.05)  | 0.66                | 1.00       |            |
| rs3779078  | DDC         | 7          | Male   | 0.19 | 386 | 1.38 (0.84-2.27)      | 0.21       | 0.78    | 1.88 (0.62-5.46)             | 0.99 (0.38-2.55)  | 1.16 (0.46-2.90)  | 2.03 (0.70-5.94)  | 0.70                | 0.97       |            |
|            |             |            | Female | 0.21 | 403 | 1.34 (0.81-2.23)      | 0.26       | 0.95    | 2.14 (0.75-6.09)             | 1.16 (0.50-2.70)  | 1.38 (0.38-5.02)  | 1.07 (0.39-2.93)  | 0.78                | 1.00       |            |
| rs6264     | DDC         | 7          | Male   | 0.00 | NA  | NA                    | NA         | NA      | NA                           | NA                | NA                | NA                | NA                  | NA         |            |
|            |             |            | Female | 0.00 | NA  | NA                    | NA         | NA      | NA                           | NA                | NA                | NA                | NA                  | NA         |            |
| rs2044859  | DDC         | 7          | Male   | 0.34 | 386 | 1.41 (0.99-2.02)      | 0.06       | 0.50    | 1.43 (0.61-3.36)             | 1.20 (0.61-2.36)  | 1.16 (0.62-2.18)  | 2.34 (1.07-5.13)  | 0.52                | 0.98       |            |
|            |             |            | Female | 0.37 | 403 | 1.28 (0.89-1.84)      | 0.19       | 0.89    | 1.81 (0.84-3.92)             | 1.23 (0.65-2.33)  | 0.87 (0.34-2.26)  | 1.24 (0.62-2.47)  | 0.70                | 1.00       |            |
| rs7786398  | DDC         | 7          | Male   | 0.44 | 386 | 1.54 (0.88-2.68)      | 0.12       | 0.65    | 2.88 (0.60-13.88)            | 1.21 (0.47-3.10)  | 0.81 (0.31-2.15)  | 4.47 (0.95-20.98) | 0.19                | 0.80       |            |
|            |             |            | Female | 0.48 | 403 | 1.43 (0.79-2.59)      | 0.23       | 0.93    | 7.44 (0.94-58.91)            | 0.91 (0.35-2.33)  | 1.03 (0.25-4.30)  | 1.30 (0.42-4.03)  | 0.19                | 0.69       |            |
| rs10276473 | DDC         | 7          | Male   | 0.20 | 386 | 1.31 (0.87-1.98)      | 0.20       | 0.78    | 1.70 (0.67-4.31)             | 0.85 (0.38-1.91)  | 1.03 (0.48-2.22)  | 2.43 (1.04-5.76)  | 0.28                | 0.90       |            |
|            |             |            | Female | 0.21 | 402 | 1.36 (0.91-2.04)      | 0.14       | 0.82    | 1.85 (0.84-4.09)             | 1.38 (0.68-2.80)  | 1.51 (0.52-4.37)  | 0.95 (0.43-2.10)  | 0.70                | 1.00       |            |
| rs11765748 | DDC         | 7          | Male   | 0.48 | 385 | 1.32 (0.75-2.31)      | 0.33       | 0.86    | 2.14 (0.44-10.43)            | 1.07 (0.42-2.77)  | 0.68 (0.26-1.83)  | 4.05 (0.86-19.08) | 0.19                | 0.79       |            |
|            |             |            | Female | 0.49 | 402 | 1.38 (0.74-2.58)      | 0.30       | 0.96    | 6.68 (0.84-53.08)            | 0.70 (0.27-1.84)  | 1.17 (0.23-6.06)  | 1.54 (0.46-5.16)  | 0.16                | 0.63       |            |
| rs7456339  | DDC         | 7          | Male   | 0.13 | 386 | 1.13 (0.65-1.98)      | 0.66       | 0.66    | 1.00 (0.29-3.53)             | 2.35 (0.85-6.52)  | 0.34 (0.09-1.27)  | 1.71 (0.55-5.27)  | 0.10                | 0.57       |            |
|            |             |            | Female | 0.15 | 403 | 1.14 (0.64-2.02)      | 0.66       | 1.00    | 0.85 (0.27-2.64)             | 0.60 (0.18-1.98)  | 1.03 (0.27-3.88)  | 3.07 (1.04-9.03)  | 0.20                | 0.70       |            |
| rs10499695 | DDC         | 7          | Male   | 0.49 | 386 | 1.49 (0.84-2.65)      | 0.16       | 0.75    | 2.34 (0.48-11.36)            | 1.15 (0.43-3.03)  | 0.90 (0.33-2.46)  | 3.98 (0.84-18.72) | 0.33                | 0.94       |            |
|            |             |            | Female | 0.49 | 403 | 1.30 (0.71-2.39)      | 0.39       | 0.99    | 6.16 (0.78-49.02)            | 0.79 (0.31-2.06)  | 0.64 (0.15-2.73)  | 1.63 (0.49-5.45)  | 0.16                | 0.63       |            |
| rs4947644  | DDC         | 7          | Male   | 0.49 | 386 | 0.61 (0.36-1.04)      | 0.07       | 0.55    | 1.22 (0.31-4.86)             | 0.34 (0.13-0.88)  | 1.38 (0.46-4.18)  | 0.33 (0.11-0.98)  | 0.11                | 0.62       |            |
|            |             |            | Female | 0.48 | 403 | 0.99 (0.56-1.74)      | 0.98       | 1.00    | 1.96 (0.52-7.43)             | 0.86 (0.32-2.33)  | 2.25 (0.45-11.34) | 0.47 (0.17-1.31)  | 0.23                | 0.76       |            |
| rs2329340  | DDC         | 7          | Male   | 0.32 | 386 | 1.41 (0.98-2.03)      | 0.07       | 0.53    | 1.76 (0.80-3.88)             | 1.23 (0.64-2.34)  | 0.80 (0.39-1.66)  | 3.03 (1.26-7.26)  | 0.12                | 0.64       |            |
|            |             |            | Female | 0.34 | 403 | 1.16 (0.80-1.67)      | 0.44       | 1.00    | 1.32 (0.62-2.84)             | 0.99 (0.53-1.86)  | 1.11 (0.46-2.71)  | 1.29 (0.62-2.65)  | 0.93                | 0.93       |            |
| rs10227616 | PRKAR2B     | 7          | Male   | 0.32 | 386 | 1.11 (0.68-1.81)      | 0.67       | 0.99    | 0.63 (0.21-1.87)             | 2.33 (0.91-5.92)  | 0.78 (0.32-1.92)  | 1.13 (0.40-3.22)  | 0.25                | 0.70       |            |
|            |             |            | Female | 0.34 | 403 | 0.98 (0.59-1.62)      | 0.94       | 1.00    | 0.90 (0.32-2.52)             | 1.28 (0.54-3.04)  | 0.79 (0.22-2.86)  | 0.84 (0.31-2.27)  | 0.89                | 0.99       |            |
| rs1544582  | PRKAR2B     | 7          | Male   | 0.48 | 385 | 1.23 (0.88-1.73)      | 0.22       | 0.89    | 2.04 (0.90-4.66)             | 1.17 (0.61-2.25)  | 1.03 (0.57-1.87)  | 1.14 (0.56-2.33)  | 0.59                | 0.97       |            |
|            |             |            | Female | 0.45 | 403 | 0.85 (0.59-1.20)      | 0.35       | 0.98    | 0.54 (0.25-1.17)             | 0.77 (0.42-1.41)  | 0.95 (0.41-2.19)  | 1.34 (0.65-2.75)  | 0.38                | 0.84       |            |
| rs2237649  | PRKAR2B     | 7          | Male   | 0.48 | 386 | 1.23 (0.87-1.72)      | 0.24       | 0.91    | 2.04 (0.90-4.66)             | 1.17 (0.61-2.25)  | 0.99 (0.54-1.81)  | 1.17 (0.57-2.38)  | 0.56                | 0.96       |            |
|            |             |            | Female | 0.45 | 401 | 0.85 (0.60-1.20)      | 0.35       | 0.98    | 0.57 (0.27-1.22)             | 0.77 (0.42-1.41)  | 0.92 (0.40-2.14)  | 1.30 (0.64-2.62)  | 0.46                | 0.91       |            |
| rs1476879  | PRKAR2B     | 7          | Male   | 0.48 | 386 | 1.25 (0.89-1.76)      | 0.20       | 0.87    | 2.04 (0.90-4.66)             | 1.22 (0.63-2.37)  | 0.99 (0.54-1.81)  | 1.20 (0.58-2.47)  | 0.57                | 0.96       |            |
|            |             |            | Female | 0.46 | 403 | 0.84 (0.59-1.19)      | 0.32       | 0.97    | 0.54 (0.25-1.17)             | 0.77 (0.42-1.41)  | 0.95 (0.41-2.19)  | 1.25 (0.62-2.51)  | 0.44                | 0.90       |            |
| rs6957586  | PRKAR2B     | 7          | Male   | 0.32 | 386 | 1.25 (0.77-2.04)      | 0.37       | 0.96    | 0.63 (0.21-1.87)             | 2.45 (0.96-6.25)  | 0.78 (0.32-1.92)  | 1.80 (0.63-5.13)  | 0.17                | 0.56       |            |
|            |             |            | Female | 0.34 | 402 | 0.96 (0.58-1.59)      | 0.88       | 1.00    | 0.88 (0.32-2.47)             | 1.28 (0.54-3.04)  | 0.80 (0.22-2.86)  | 0.79 (0.29-2.14)  | 0.87                | 0.98       |            |
| rs11766415 | PRKAR2B     | 7          | Male   | 0.42 | 386 | 0.92 (0.65-1.29)      | 0.63       | 0.99    | 0.73 (0.34-1.57)             | 1.21 (0.63-2.35)  | 0.61 (0.32-1.15)  | 1.41 (0.69-2.87)  | 0.25                | 0.71       |            |
|            |             |            | Female | 0.42 | 403 | 1.12 (0.79-1.59)      | 0.51       | 1.00    | 0.62 (0.30-1.27)             | 1.60 (0.86-3.00)  | 1.39 (0.57-3.43)  | 1.15 (0.59-2.25)  | 0.23                | 0.69       |            |
| rs3801969  | PRKAR2B     | 7          | Male   | 0.45 | 386 | 1.09 (0.65-1.83)      | 0.75       | 0.99    | 0.79 (0.24-2.59)             | 2.67 (0.90-7.95)  | 0.65 (0.26-1.65)  | 0.99 (0.34-2.88)  | 0.23                | 0.68       |            |
|            |             |            | Female | 0.44 | 403 | 0.73 (0.43-1.24)      | 0.25       | 0.93    | 0.61 (0.22-1.72)             | 0.77 (0.30-2.00)  | 0.97 (0.26-3.67)  | 0.69 (0.25-1.90)  | 0.96                | 1.00       |            |
| rs2536503  | PRKAR2B     | 7          | Male   | 0.13 | 386 | 0.78 (0.45-1.34)      | 0.36       | 0.96    | 0.24 (0.03-1.87)             | 0.50 (0.18-1.38)  | 1.86 (0.64-5.36)  | 1.03 (0.36-2.90)  | 0.15                | 0.53       |            |
|            |             |            | Female | 0.12 | 403 | 1.02 (0.59-1.76)      | 0.96       | 1.00    | 1.50 (0.60-3.73)             | 0.44 (0.12-1.56)  | 1.90 (0.55-6.63)  | 0.85 (0.27-2.72)  | 0.30                | 0.78       |            |
| rs2536504  | PRKAR2B     | 7          | Male   | 0.34 | 385 | 1.60 (0.97-2.65)      | 0.06       | 0.50    | 3.24 (0.95-11.04)            | 1.25 (0.50-3.15)  | 1.64 (0.66-4.08)  | 1.20 (0.42-3.45)  | 0.59                | 0.97       |            |
|            |             |            | Female | 0.34 | 403 | 0.83 (0.50-1.37)      | 0.47       | 1.00    | 0.48 (0.17-1.37)             | 1.19 (0.50-2.82)  | 0.98 (0.27-3.54)  | 0.76 (0.28-2.05)  | 0.61                | 0.97       |            |
| rs6960842  | PRKAR2B     | 7          | Male   | 0.42 | 385 | 1.28 (0.75-2.19)      | 0.36       | 0.97    | 4.27 (0.90-20.31)            | 1.23 (0.45-3.38)  | 1.25 (0.48-3.25)  | 0.59 (0.20-1.75)  | 0.19                | 0.62       |            |
|            |             |            | Female | 0.43 | 403 | 0.83 (0.49-1.40)      | 0.48       | 1.00    | 0.56 (0.20-1.56)             | 1.12 (0.45-2.76)  | 1.05 (0.25-4.39)  | 0.73 (0.26-2.02)  | 0.76                | 0.99       |            |
| rs17340577 | PRKAR2B     | 7          | Male   | 0.07 | 383 | 0.58 (0.27-1.24)      | 0.14       | 0.78    | 0.85 (0.17-4.32)             | 0.81 (0.24-2.81)  | 0.80 (0.19-3.31)  | NA                | 0.18                | 0.59       |            |
|            |             |            | Female | 0.09 | 400 | 1.01 (0.54-1.90)      | 0.98       | 1.00    | 1.48 (0.49-4.45)             | 1.20 (0.38-3.79)  | 0.62 (0.13-2.95)  | 0.74 (0.19-2.89)  | 0.77                | 0.98       |            |
| rs2299419  | PRKAR2B     | 7          | Male   | 0.09 | 386 | 0.86 (0.46-1.59)      | 0.6        |         |                              |                   |                   |                   |                     |            |            |

| SNP        | Gene Region | Chromosome | Gender | MAF  | N   | Marginal Effect  |            |                       | Treatment Stratified Effects |                   |                   |                   | Test of Interaction |            |
|------------|-------------|------------|--------|------|-----|------------------|------------|-----------------------|------------------------------|-------------------|-------------------|-------------------|---------------------|------------|
|            |             |            |        |      |     | SNP OR (95% CI)  |            | Likelihood ratio test | Placebo                      | Bupropion         | Patch             | Spray             | Observed P          | Adjusted P |
|            |             |            |        |      |     | Observed P       | Adjusted P | SNP OR (95% CI)       | SNP OR (95% CI)              | SNP OR (95% CI)   | SNP OR (95% CI)   | Observed P        | Adjusted P          |            |
| rs2303928  | CDK5        | 7          | Male   | 0.39 | 386 | 0.93 (0.65-1.33) | 0.69       | 1.00                  | 1.20 (0.55-2.64)             | 0.68 (0.35-1.33)  | 0.80 (0.40-1.59)  | 1.38 (0.62-3.08)  | 0.49                | 0.75       |
|            |             |            | Female | 0.40 | 403 | 0.87 (0.59-1.28) | 0.47       | 0.94                  | 0.53 (0.23-1.24)             | 1.10 (0.59-2.05)  | 0.91 (0.35-2.36)  | 0.92 (0.41-2.07)  | 0.58                | 0.87       |
| rs2069459  | CDK5        | 7          | Male   | 0.39 | 385 | 0.98 (0.70-1.37) | 0.90       | 0.90                  | 0.51 (0.22-1.18)             | 0.97 (0.50-1.90)  | 1.25 (0.70-2.22)  | 1.19 (0.57-2.46)  | 0.32                | 0.63       |
|            |             |            | Female | 0.37 | 402 | 1.11 (0.76-1.64) | 0.58       | 0.95                  | 1.36 (0.60-3.09)             | 1.03 (0.52-2.05)  | 0.93 (0.34-2.50)  | 1.15 (0.57-2.33)  | 0.94                | 0.94       |
| rs891507   | CDK5        | 7          | Male   | 0.15 | 349 | 1.05 (0.59-1.88) | 0.86       | 0.98                  | 0.96 (0.26-3.50)             | 0.67 (0.23-1.93)  | 1.82 (0.59-5.55)  | 1.18 (0.35-3.91)  | 0.64                | 0.80       |
|            |             |            | Female | 0.15 | 374 | 0.71 (0.38-1.30) | 0.26       | 0.79                  | 0.13 (0.02-1.08)             | 1.23 (0.47-3.20)  | 0.65 (0.12-3.44)  | 0.89 (0.28-2.83)  | 0.16                | 0.42       |
| rs2069454  | CDK5        | 7          | Male   | 0.15 | 354 | 1.56 (0.89-2.74) | 0.12       | 0.59                  | 0.64 (0.16-2.56)             | 4.54 (1.63-12.67) | 1.27 (0.49-3.35)  | 0.83 (0.16-4.21)  | 0.08                | 0.26       |
|            |             |            | Female | 0.12 | 373 | 2.06 (1.15-3.69) | 0.02       | 0.13                  | 1.28 (0.40-4.09)             | 3.95 (1.48-10.53) | 6.10 (1.29-28.78) | 0.50 (0.10-2.43)  | 0.04                | 0.15       |
| rs2069443  | CDK5        | 7          | Male   | 0.26 | 385 | 1.08 (0.66-1.75) | 0.76       | 0.99                  | 2.87 (0.93-8.86)             | 0.90 (0.36-2.22)  | 1.29 (0.53-3.16)  | 0.42 (0.13-1.29)  | 0.10                | 0.29       |
|            |             |            | Female | 0.26 | 402 | 0.98 (0.59-1.62) | 0.93       | 1.00                  | 1.58 (0.56-4.41)             | 0.87 (0.37-2.06)  | 0.68 (0.18-2.53)  | 0.90 (0.34-2.43)  | 0.75                | 0.92       |
| rs1549760  | CDK5        | 7          | Male   | 0.23 | 386 | 1.08 (0.66-1.78) | 0.75       | 1.00                  | 2.00 (0.67-6.02)             | 1.06 (0.42-2.67)  | 1.42 (0.58-3.48)  | 0.42 (0.14-1.32)  | 0.22                | 0.49       |
|            |             |            | Female | 0.23 | 403 | 1.03 (0.62-1.71) | 0.92       | 1.00                  | 1.93 (0.69-5.42)             | 0.96 (0.40-2.31)  | 0.52 (0.12-2.14)  | 0.91 (0.34-2.47)  | 0.48                | 0.81       |
| rs3793336  | CDK5        | 7          | Male   | 0.14 | 301 | 1.10 (0.58-2.07) | 0.78       | 0.98                  | 0.48 (0.09-2.55)             | 0.62 (0.18-2.07)  | 2.78 (0.91-8.51)  | 1.23 (0.33-4.53)  | 0.21                | 0.51       |
|            |             |            | Female | 0.14 | 319 | 0.98 (0.51-1.90) | 0.96       | 0.96                  | 0.27 (0.03-2.29)             | 1.92 (0.64-5.75)  | 0.69 (0.13-3.63)  | 1.04 (0.32-3.38)  | 0.33                | 0.67       |
| rs2303933  | CDK5        | 7          | Male   | 0.40 | 386 | 1.11 (0.67-1.85) | 0.68       | 1.00                  | 0.58 (0.19-1.78)             | 2.76 (0.93-8.20)  | 1.06 (0.42-2.70)  | 0.77 (0.27-2.19)  | 0.20                | 0.49       |
|            |             |            | Female | 0.41 | 403 | 1.39 (0.80-2.42) | 0.23       | 0.79                  | 1.15 (0.37-3.55)             | 2.04 (0.75-5.55)  | 2.36 (0.47-11.91) | 0.85 (0.31-2.30)  | 0.56                | 0.87       |
| rs2303937  | CDK5        | 7          | Male   | 0.45 | 385 | 0.92 (0.54-1.55) | 0.75       | 1.00                  | 1.23 (0.38-3.95)             | 1.35 (0.47-3.86)  | 0.74 (0.28-1.97)  | 0.60 (0.21-1.74)  | 0.68                | 0.68       |
|            |             |            | Female | 0.44 | 403 | 1.26 (0.71-2.23) | 0.42       | 0.93                  | 6.10 (0.77-48.48)            | 0.83 (0.33-2.08)  | 1.20 (0.29-4.97)  | 1.06 (0.38-3.00)  | 0.24                | 0.54       |
| rs11765015 | CDK5        | 7          | Male   | 0.28 | 382 | 1.14 (0.70-1.86) | 0.59       | 1.00                  | 2.72 (0.88-8.38)             | 1.46 (0.59-3.65)  | 1.05 (0.43-2.60)  | 0.40 (0.13-1.25)  | 0.10                | 0.29       |
|            |             |            | Female | 0.26 | 402 | 0.85 (0.51-1.41) | 0.52       | 0.93                  | 0.93 (0.33-2.60)             | 0.80 (0.34-1.90)  | 0.60 (0.16-2.25)  | 1.02 (0.38-2.74)  | 0.93                | 0.99       |
| rs4733065  | CHRNA2      | 8          | Male   | 0.46 | 380 | 0.85 (0.50-1.44) | 0.55       | 1.00                  | 0.57 (0.18-1.78)             | 1.00 (0.37-2.71)  | 0.71 (0.27-1.85)  | 1.35 (0.39-4.60)  | 0.74                | 1.00       |
|            |             |            | Female | 0.46 | 400 | 0.88 (0.51-1.51) | 0.64       | 1.00                  | 0.99 (0.32-3.11)             | 0.84 (0.36-1.99)  | 0.57 (0.15-2.21)  | 1.12 (0.36-3.50)  | 0.89                | 0.98       |
| rs2278319  | CHRNA2      | 8          | Male   | 0.24 | 386 | 1.00 (0.61-1.63) | 0.99       | 0.99                  | 0.66 (0.21-2.12)             | 0.72 (0.29-1.82)  | 0.87 (0.35-2.17)  | 2.50 (0.86-7.24)  | 0.27                | 0.86       |
|            |             |            | Female | 0.25 | 403 | 0.96 (0.58-1.60) | 0.88       | 1.00                  | 1.29 (0.46-3.62)             | 0.76 (0.31-1.86)  | 0.55 (0.15-2.05)  | 1.38 (0.51-3.72)  | 0.61                | 0.95       |
| rs1106359  | CHRNA2      | 8          | Male   | 0.42 | 386 | 1.03 (0.61-1.73) | 0.91       | 1.00                  | 1.21 (0.38-3.88)             | 1.27 (0.48-3.36)  | 0.95 (0.36-2.50)  | 0.76 (0.26-2.20)  | 0.90                | 1.00       |
|            |             |            | Female | 0.40 | 403 | 1.20 (0.71-2.04) | 0.49       | 1.00                  | 1.51 (0.49-4.65)             | 1.07 (0.44-2.59)  | 0.77 (0.21-2.78)  | 1.59 (0.52-4.88)  | 0.81                | 1.00       |
| rs1879184  | CHRNA2      | 8          | Male   | 0.13 | 386 | 1.20 (0.69-2.07) | 0.53       | 1.00                  | 1.41 (0.43-4.65)             | 0.87 (0.31-2.40)  | 0.93 (0.32-2.68)  | 0.77 (0.27-2.19)  | 0.64                | 1.00       |
|            |             |            | Female | 0.14 | 403 | 1.02 (0.58-1.81) | 0.94       | 0.94                  | 0.91 (0.27-3.12)             | 1.09 (0.42-2.82)  | 2.12 (0.58-7.78)  | 0.54 (0.14-2.04)  | 0.53                | 0.95       |
| rs10093964 | CHRNA2      | 8          | Male   | 0.43 | 384 | 1.09 (0.77-1.55) | 0.61       | 1.00                  | 1.36 (0.64-2.87)             | 1.09 (0.58-2.03)  | 1.20 (0.62-2.33)  | 0.78 (0.36-1.69)  | 0.76                | 1.00       |
|            |             |            | Female | 0.41 | 403 | 1.11 (0.78-1.57) | 0.56       | 1.00                  | 1.63 (0.77-3.45)             | 0.98 (0.55-1.73)  | 0.88 (0.38-2.06)  | 1.13 (0.56-2.29)  | 0.68                | 0.98       |
| rs1879182  | CHRNA2      | 8          | Male   | 0.13 | 386 | 1.20 (0.69-2.07) | 0.53       | 1.00                  | 1.41 (0.43-4.65)             | 0.87 (0.31-2.40)  | 0.93 (0.33-2.68)  | 0.77 (0.27-2.19)  | 0.64                | 1.00       |
|            |             |            | Female | 0.14 | 403 | 1.02 (0.58-1.81) | 0.94       | 0.94                  | 0.91 (0.27-3.12)             | 1.09 (0.42-2.82)  | 2.12 (0.58-7.78)  | 0.54 (0.14-2.04)  | 0.53                | 0.95       |
| rs748283   | CHRNA2      | 8          | Male   | 0.49 | 386 | 0.89 (0.63-1.25) | 0.51       | 1.00                  | 0.75 (0.37-1.52)             | 1.14 (0.57-2.30)  | 0.76 (0.40-1.46)  | 0.99 (0.49-2.00)  | 0.79                | 1.00       |
|            |             |            | Female | 0.49 | 403 | 0.88 (0.63-1.25) | 0.48       | 1.00                  | 0.75 (0.36-1.56)             | 0.88 (0.50-1.54)  | 0.81 (0.34-1.91)  | 1.10 (0.54-2.24)  | 0.89                | 1.00       |
| rs1057137  | CHRNA2      | 8          | Male   | 0.40 | 379 | 1.05 (0.62-1.77) | 0.86       | 1.00                  | 1.61 (0.46-5.60)             | 0.88 (0.34-2.24)  | 1.09 (0.42-2.85)  | 0.88 (0.29-2.69)  | 0.87                | 1.00       |
|            |             |            | Female | 0.39 | 401 | 1.14 (0.68-1.92) | 0.61       | 1.00                  | 1.83 (0.60-5.59)             | 0.87 (0.37-2.08)  | 0.77 (0.21-2.78)  | 1.42 (0.49-4.13)  | 0.66                | 0.97       |
| rs735421   | CHRNA2      | 8          | Male   | 0.29 | 382 | 1.31 (0.80-2.16) | 0.28       | 0.93                  | 0.85 (0.28-2.61)             | 1.32 (0.52-3.33)  | 1.58 (0.64-3.89)  | 1.50 (0.51-4.41)  | 0.85                | 1.00       |
|            |             |            | Female | 0.31 | 401 | 1.03 (0.62-1.70) | 0.92       | 1.00                  | 1.36 (0.47-3.88)             | 0.99 (0.42-2.31)  | 0.65 (0.18-2.37)  | 1.09 (0.40-2.96)  | 0.86                | 1.00       |
| rs891394   | CHRNA2      | 8          | Male   | 0.25 | 386 | 1.06 (0.72-1.58) | 0.76       | 1.00                  | 0.98 (0.35-2.69)             | 1.03 (0.51-2.08)  | 0.90 (0.42-1.92)  | 1.39 (0.64-3.03)  | 0.88                | 1.00       |
|            |             |            | Female | 0.27 | 403 | 0.95 (0.65-1.40) | 0.81       | 1.00                  | 0.76 (0.34-1.70)             | 1.09 (0.55-2.17)  | 0.61 (0.23-1.65)  | 1.33 (0.63-2.81)  | 0.56                | 0.96       |
| rs3735757  | CHRNA2      | 8          | Male   | 0.13 | 386 | 1.10 (0.67-1.80) | 0.72       | 1.00                  | 1.20 (0.39-3.67)             | 0.99 (0.40-2.43)  | 0.82 (0.30-2.20)  | 1.62 (0.60-4.36)  | 0.80                | 1.00       |
|            |             |            | Female | 0.14 | 398 | 0.82 (0.48-1.42) | 0.48       | 1.00                  | 0.40 (0.10-1.65)             | 1.04 (0.43-2.52)  | 1.93 (0.58-6.50)  | 0.52 (0.14-1.90)  | 0.28                | 0.81       |
| rs2322581  | CHRNA2      | 8          | Male   | 0.17 | 386 | 0.98 (0.61-1.56) | 0.93       | 1.00                  | 1.31 (0.46-3.74)             | 0.84 (0.35-2.04)  | 0.91 (0.38-2.21)  | 1.00 (0.40-2.54)  | 0.93                | 1.00       |
|            |             |            | Female | 0.15 | 403 | 0.89 (0.54-1.46) | 0.64       | 1.00                  | 0.52 (0.16-1.67)             | 1.14 (0.50-2.63)  | 1.61 (0.48-5.40)  | 0.69 (0.23-2.05)  | 0.50                | 0.96       |
| rs891398   | CHRNA2      | 8          | Male   | 0.47 | 386 | 1.93 (1.05-3.54) | 0.03       | 0.29                  | NA                           | 1.71 (0.56-5.21)  | 1.12 (0.43-2.93)  | 2.70 (0.71-10.23) | 0.15                | 0.68       |
|            |             |            | Female | 0.48 | 403 | 0.96 (0.56-1.67) | 0.89       | 1.00                  | 0.52 (0.18-1.52)             | 1.27 (0.50-3.23)  | 1.60 (0.31-8.16)  | 0.92 (0.31-2.71)  | 0.57                | 0.94       |
| rs891399   | CHRNA2      | 8          | Male   | 0.13 | 386 | 1.19 (0.72-1.96) | 0.49       | 1.00                  | 0.90 (0.27-2.99)             | 1.21 (0.51-2.92)  | 1.17 (0.47-2.96)  | 1.53 (0.51-4.59)  | 0.94                | 1.00       |
|            |             |            | Female | 0.13 | 402 | 0.92 (0.53-1.58) | 0.76       | 1.00                  | 0.63 (0.20-2.02)             | 1.09 (0.44-2.72)  | 1.93 (0.58-6.44)  | 0.53 (0.14-2.01)  | 0.45                | 0.93       |
| rs2565062  | CHRNA2      | 8          | Male   | 0.13 | 386 | 1.19 (0.72-1.96) | 0.49       | 1.00                  | 0.90 (0.27-2.99)             | 1.21 (0.51-2.92)  | 1.17 (0.47-2.96)  | 1.53 (0.51-4.59)  | 0.94                | 1.00       |
|            |             |            | Female | 0.13 | 403 | 0.92 (0.53-1.58) | 0.76       | 1.00                  | 0.64 (0.20-2.03)             | 1.09 (0.44-2.72)  | 1.93 (0.58-6.44)  | 0.53 (0.14-2.01)  | 0.45                | 0.93       |
| rs2472554  | CHRNA2      | 8          | Male   | 0.30 | 386 | 0.91 (0.56-1.48) | 0.70       | 1.00                  | 0.86 (0.29-2.58)             | 0.90 (0.37-2.23)  | 0.66 (0.27-1.64)  | 1.45 (0.51-4.11)  | 0.74                | 1.00       |
|            |             |            | Female | 0.31 | 403 | 1.17 (0.71-1.93) | 0.54       | 1.00                  | 2.75 (0.90-8.41)             | 0.62 (0.27-1.45)  | 0.77 (0.21-2.78)  | 1.74 (0.62-4.85)  | 0.13                | 0.57       |
| rs2472553  | CHRNA2      | 8          | Male   | 0.13 | 386 | 1.18 (0.72-1.94) | 0.52       | 1.00                  | 0.86 (0.26-2.83)             | 1.21 (0.51-2.92)  | 1.17 (0.47-2.96)  | 1.53 (0.51-4.59)  | 0.92                | 1.00       |
|            |             |            | Female | 0.13 | 403 | 1.02 (0.60-1.75) | 0.93       | 1.00                  | 0.66 (0.21-2.10)             | 1.37 (0.56-3.32)  | 1.93 (0.58-6.44)  | 0.57 (0.15-2.18)  | 0.42                | 0.91       |
| rs7815010  | CHRNA2      | 8          | Male   | 0.25 | 386 | 1.06 (0.71-1.57) | 0.78       | 1.00                  | 0.58 (0.21-1.60)             | 1.07 (0.52-2.22)  | 1.24 (0.62-2.45)  | 1.30 (0.56-3.03)  | 0.59                | 1.00       |
|            |             |            | Female | 0.25 | 403 | 0.93 (0.62-1.40) | 0.74       | 1.00                  | 0.64 (0.25-1.65)             | 1.03 (0.54-1.95)  | 2.11 (0.77-5.79)  | 0.59 (0.23-1.53)  | 0.24                | 0.78       |
| rs2741339  | CHRNA2      | 8          | Male   | 0.28 | 386 | 1.41 (0.98-2.03) | 0.07       | 0.53                  | 1.97 (0.85-4.55)             | 1.16 (0.58-2.33)  | 1.11 (0.55-2.24)  | 1.80 (0.83-3.88)  | 0.62                | 1.00       |
|            |             |            | Female | 0.26 | 403 | 1.16 (0.78-1.73) | 0.46       | 1.00                  | 0.74 (0.31-1.73)             | 1.47 (0.79-2.74)  | 0.55 (0.18-1.72)  | 2.13 (0.88-5.16)  | 0.14                | 0.60       |
| rs2565059  | CHRNA2      | 8          | Male   | 0.18 | 385 | 1.50 (0.98-2.29) | 0.07       | 0.52                  | 2.06 (0.81-5.24)             | 1.61 (0.70-3.70)  | 1.38 (0.63-3.05)  | 1.16 (0.47-2.82)  | 0.84                | 1.00       |
|            |             |            | Female | 0.19 | 403 | 1.17 (0.75-1.82) | 0.49       | 1.00                  | 0.81 (0.33-2.00)             | 1.96 (0.94-4.08)  | 0.64 (0.18-2.20)  | 1.23 (0.47-3.25)  | 0.31                | 0.84       |
| rs2565055  | CHRNA2      | 8          | Male   | 0.24 | 386 | 1.42 (0.97-2.32) | 0.16       | 0.78                  | 1.43 (0.47-4.28)             | 1.66 (0.67-4.10)  | 1.33 (0.53-3.20)  | 1.27 (0.45-3.63)  | 0.91                | 0.98       |
|            |             |            | Female | 0.24 | 403 | 0.98 (0.59-1.63) | 0.94       | 1.00                  | 0.78 (0.28-2.22)             | 1.61 (0.69-3.78)  | 0.69              |                   |                     |            |

| SNP        | Gene Region | Chromosome | Gender | MAF  | N   | Marginal Effect       |            |            | Treatment Stratified Effects |                  |                   |                   | Test of Interaction     |                 |       |  |            |            |
|------------|-------------|------------|--------|------|-----|-----------------------|------------|------------|------------------------------|------------------|-------------------|-------------------|-------------------------|-----------------|-------|--|------------|------------|
|            |             |            |        |      |     | Likelihood ratio test |            |            | Placebo                      |                  | Bupropion         |                   | Patch                   |                 | Spray |  | Observed P | Adjusted P |
|            |             |            |        |      |     | SNP OR (95% CI)       | Observed P | Adjusted P | SNP OR (95% CI)              | SNP OR (95% CI)  | SNP OR (95% CI)   | SNP OR (95% CI)   | SNP OR (95% CI)         | SNP OR (95% CI) |       |  |            |            |
| rs10819610 | FREQ        | 9          | Female | 0.27 | 385 | 0.90 (0.61-1.31)      | 0.56       | 1.00       | 1.06 (0.50-2.24)             | 0.66 (0.31-1.41) | 0.85 (0.42-1.75)  | 1.12 (0.52-2.44)  | 0.77                    | 1.00            |       |  |            |            |
| rs3824544  | FREQ        | 9          | Female | 0.29 | 403 | 1.01 (0.68-1.49)      | 0.96       | 0.96       | 1.32 (0.60-2.87)             | 1.09 (0.58-2.06) | 0.40 (0.12-1.36)  | 1.07 (0.49-2.33)  | 0.39                    | 0.98            |       |  |            |            |
| rs7862394  | FREQ        | 9          | Female | 0.23 | 402 | 1.08 (0.73-1.60)      | 0.69       | 1.00       | 1.21 (0.55-2.65)             | 0.86 (0.41-1.79) | 0.99 (0.47-2.06)  | 1.55 (0.63-3.79)  | 0.77                    | 1.00            |       |  |            |            |
| rs10819611 | FREQ        | 9          | Female | 0.32 | 386 | 1.16 (0.72-1.89)      | 0.54       | 1.00       | 1.17 (0.50-2.74)             | 1.37 (0.76-2.45) | 1.20 (0.42-3.44)  | 1.18 (0.51-2.74)  | 0.99                    | 1.00            |       |  |            |            |
| rs1009502  | FREQ        | 9          | Female | 0.31 | 403 | 1.09 (0.66-1.80)      | 0.74       | 1.00       | 1.38 (0.64-4.13)             | 0.67 (0.27-1.64) | 1.07 (0.44-2.63)  | 2.33 (0.81-6.72)  | 0.35                    | 0.97            |       |  |            |            |
| rs1342043  | FREQ        | 9          | Female | 0.32 | 385 | 1.14 (0.70-1.86)      | 0.59       | 1.00       | 1.18 (0.42-3.28)             | 0.82 (0.35-1.90) | 1.20 (0.32-4.52)  | 1.43 (0.53-3.86)  | 0.86                    | 1.00            |       |  |            |            |
| rs7856531  | FREQ        | 9          | Female | 0.31 | 403 | 0.93 (0.56-1.53)      | 0.77       | 1.00       | 2.16 (0.70-6.62)             | 0.70 (0.29-1.72) | 0.82 (0.34-2.01)  | 1.94 (0.68-5.57)  | 0.27                    | 0.93            |       |  |            |            |
| rs7037293  | FREQ        | 9          | Female | 0.31 | 403 | 0.91 (0.56-1.49)      | 0.72       | 1.00       | 1.10 (0.40-3.05)             | 0.85 (0.36-1.97) | 1.36 (0.36-5.12)  | 0.72 (0.27-1.95)  | 0.87                    | 1.00            |       |  |            |            |
| rs7024495  | FREQ        | 9          | Female | 0.32 | 385 | 1.04 (0.62-1.74)      | 0.88       | 1.00       | 1.10 (0.37-3.29)             | 0.51 (0.21-1.29) | 1.09 (0.44-2.71)  | 1.31 (0.46-3.77)  | 0.52                    | 1.00            |       |  |            |            |
| rs7023210  | FREQ        | 9          | Female | 0.32 | 385 | 1.04 (0.62-1.74)      | 0.88       | 1.00       | 2.87 (0.85-9.67)             | 0.70 (0.30-1.67) | 0.76 (0.21-2.78)  | 0.95 (0.34-2.63)  | 0.26                    | 0.90            |       |  |            |            |
| rs947513   | FREQ        | 9          | Female | 0.15 | 401 | 0.79 (0.45-1.40)      | 0.42       | 1.00       | 0.42 (0.09-2.03)             | 1.31 (0.48-3.58) | 1.69 (0.65-4.44)  | 1.93 (0.62-5.98)  | 0.37                    | 0.98            |       |  |            |            |
| rs7856531  | FREQ        | 9          | Female | 0.15 | 401 | 0.79 (0.45-1.40)      | 0.42       | 1.00       | 0.90 (0.26-3.05)             | 1.03 (0.41-2.55) | 0.50 (0.10-2.53)  | 0.63 (0.20-1.93)  | 0.84                    | 1.00            |       |  |            |            |
| rs7037293  | FREQ        | 9          | Female | 0.15 | 399 | 1.19 (0.74-1.89)      | 0.48       | 1.00       | 1.04 (0.32-3.35)             | 0.65 (0.24-1.72) | 0.94 (0.35-2.58)  | 2.72 (0.72-10.33) | 0.36                    | 0.98            |       |  |            |            |
| rs7024495  | FREQ        | 9          | Female | 0.15 | 399 | 0.87 (0.50-1.50)      | 0.62       | 1.00       | 3.82 (0.82-17.87)            | 0.59 (0.25-1.42) | 0.76 (0.18-3.21)  | 0.56 (0.19-1.63)  | 0.11                    | 0.60            |       |  |            |            |
| rs7023210  | FREQ        | 9          | Female | 0.15 | 399 | 0.71 (0.41-1.22)      | 0.20       | 0.98       | 0.44 (0.11-1.80)             | 1.20 (0.46-3.11) | 2.23 (0.95-5.23)  | 1.12 (0.43-2.93)  | 0.20                    | 0.85            |       |  |            |            |
| rs7024495  | FREQ        | 9          | Female | 0.15 | 399 | 0.71 (0.41-1.22)      | 0.20       | 0.98       | 0.84 (0.28-2.59)             | 0.91 (0.39-2.11) | 0.52 (0.12-2.29)  | 0.47 (0.14-1.55)  | 0.78                    | 1.00            |       |  |            |            |
| rs7023210  | FREQ        | 9          | Female | 0.15 | 399 | 0.71 (0.41-1.22)      | 0.20       | 0.98       | 1.40 (0.37-5.08)             | 0.70 (0.27-1.77) | 0.75 (0.29-1.99)  | 1.54 (0.44-5.39)  | 0.66                    | 1.00            |       |  |            |            |
| rs7024495  | FREQ        | 9          | Female | 0.15 | 399 | 0.71 (0.41-1.22)      | 0.20       | 0.98       | 3.84 (0.82-17.99)            | 0.59 (0.25-1.41) | 0.30 (0.07-1.25)  | 1.13 (0.38-3.38)  | 0.05                    | 0.39            |       |  |            |            |
| rs7023210  | FREQ        | 9          | Female | 0.15 | 399 | 0.71 (0.41-1.22)      | 0.20       | 0.98       | 1.23 (0.36-4.27)             | 0.52 (0.19-1.36) | 0.94 (0.35-2.57)  | 3.78 (0.80-17.86) | 0.14                    | 0.72            |       |  |            |            |
| rs947513   | FREQ        | 9          | Female | 0.15 | 399 | 0.71 (0.41-1.22)      | 0.20       | 0.98       | 3.32 (0.71-15.58)            | 0.76 (0.31-1.86) | 1.29 (0.25-6.65)  | 0.47 (0.16-1.38)  | 0.16                    | 0.73            |       |  |            |            |
| rs10819615 | FREQ        | 9          | Female | 0.15 | 399 | 0.71 (0.41-1.22)      | 0.20       | 0.98       | 0.98 (0.30-3.17)             | 0.60 (0.22-1.60) | 0.90 (0.33-2.46)  | 4.13 (0.88-19.52) | 0.16                    | 0.76            |       |  |            |            |
| rs3897499  | FREQ        | 9          | Female | 0.15 | 399 | 0.71 (0.41-1.22)      | 0.20       | 0.98       | 3.33 (0.71-15.60)            | 0.76 (0.31-1.87) | 1.22 (0.24-6.27)  | 0.50 (0.17-1.47)  | 0.18                    | 0.79            |       |  |            |            |
| rs4240446  | FREQ        | 9          | Female | 0.15 | 381 | 1.09 (0.76-1.58)      | 0.63       | 1.00       | 0.89 (0.43-1.83)             | 0.79 (0.39-1.62) | 0.95 (0.50-1.82)  | 1.73 (0.87-3.46)  | 0.40                    | 0.98            |       |  |            |            |
| rs10988645 | FREQ        | 9          | Female | 0.15 | 381 | 1.09 (0.76-1.58)      | 0.63       | 1.00       | 0.93 (0.45-1.92)             | 1.19 (0.68-2.08) | 1.05 (0.39-2.82)  | 0.92 (0.44-1.92)  | 0.94                    | 1.00            |       |  |            |            |
| rs3829905  | FREQ        | 9          | Female | 0.15 | 381 | 1.11 (0.79-1.58)      | 0.54       | 1.00       | 1.24 (0.58-2.67)             | 1.39 (0.70-2.75) | 1.05 (0.55-1.99)  | 0.85 (0.40-1.78)  | 0.79                    | 0.99            |       |  |            |            |
| rs2277200  | FREQ        | 9          | Female | 0.15 | 381 | 1.09 (0.76-1.58)      | 0.63       | 1.00       | 1.15 (0.56-2.37)             | 0.82 (0.44-1.53) | 0.99 (0.36-2.72)  | 1.68 (0.80-3.53)  | 0.54                    | 1.00            |       |  |            |            |
| rs7873936  | FREQ        | 9          | Female | 0.15 | 381 | 1.22 (0.74-2.01)      | 0.43       | 1.00       | 1.95 (0.61-6.23)             | 0.70 (0.28-1.76) | 0.80 (0.33-1.96)  | 3.30 (0.99-11.04) | 0.12                    | 0.66            |       |  |            |            |
| rs7852859  | FREQ        | 9          | Female | 0.15 | 381 | 1.22 (0.74-2.01)      | 0.43       | 1.00       | 1.03 (0.37-2.87)             | 1.24 (0.53-2.91) | 3.84 (0.77-19.17) | 0.98 (0.37-2.64)  | 0.46                    | 1.00            |       |  |            |            |
| rs1054879  | FREQ        | 9          | Female | 0.15 | 381 | 1.22 (0.74-2.01)      | 0.43       | 1.00       | 0.45 (0.11-1.80)             | 1.03 (0.38-2.74) | 1.29 (0.49-3.42)  | 1.04 (0.41-2.64)  | 0.63                    | 1.00            |       |  |            |            |
| rs13710    | FREQ        | 9          | Female | 0.15 | 381 | 1.22 (0.74-2.01)      | 0.43       | 1.00       | 0.78 (0.25-2.42)             | 1.10 (0.47-2.61) | 0.70 (0.15-3.31)  | 0.33 (0.09-1.26)  | 0.50                    | 1.00            |       |  |            |            |
| rs7867364  | FREQ        | 9          | Female | 0.15 | 381 | 1.22 (0.74-2.01)      | 0.43       | 1.00       | 2.04 (0.67-6.24)             | 0.83 (0.34-2.05) | 0.58 (0.24-1.43)  | 1.52 (0.54-4.31)  | 0.28                    | 0.94            |       |  |            |            |
| rs7867364  | FREQ        | 9          | Female | 0.15 | 381 | 1.22 (0.74-2.01)      | 0.43       | 1.00       | 1.09 (0.39-3.03)             | 1.09 (0.47-2.53) | 1.41 (0.39-5.08)  | 1.47 (0.54-3.96)  | 0.96                    | 1.00            |       |  |            |            |
| rs7867364  | FREQ        | 9          | Female | 0.15 | 381 | 1.22 (0.74-2.01)      | 0.43       | 1.00       | 2.18 (0.59-8.03)             | 0.67 (0.26-1.72) | 0.71 (0.27-1.85)  | 2.59 (0.74-9.07)  | 0.18                    | 0.81            |       |  |            |            |
| rs7867364  | FREQ        | 9          | Female | 0.15 | 381 | 1.22 (0.74-2.01)      | 0.43       | 1.00       | 0.82 (0.28-2.38)             | 1.41 (0.59-3.41) | 3.25 (0.64-16.39) | 0.83 (0.30-2.30)  | 0.42                    | 0.99            |       |  |            |            |
| rs7867364  | FREQ        | 9          | Female | 0.15 | 381 | 1.22 (0.74-2.01)      | 0.43       | 1.00       | 2.53 (0.79-8.08)             | 0.69 (0.28-1.69) | 0.58 (0.24-1.42)  | 1.44 (0.50-4.15)  | 0.16                    | 0.77            |       |  |            |            |
| rs7867364  | FREQ        | 9          | Female | 0.15 | 381 | 1.22 (0.74-2.01)      | 0.43       | 1.00       | 0.87 (0.31-2.42)             | 0.80 (0.35-1.86) | 0.94 (0.26-3.38)  | 0.91 (0.34-2.46)  | 1.00                    | 1.00            |       |  |            |            |
| rs7867364  | FREQ        | 9          | Female | 0.15 | 381 | 1.22 (0.74-2.01)      | 0.43       | 1.00       | 2.53 (0.79-8.08)             | 0.69 (0.28-1.69) | 0.58 (0.24-1.42)  | 1.44 (0.50-4.15)  | 0.16                    | 0.77            |       |  |            |            |
| rs7867364  | FREQ        | 9          | Female | 0.15 | 381 | 1.22 (0.74-2.01)      | 0.43       | 1.00       | 0.92 (0.33-2.56)             | 0.80 (0.35-1.86) | 0.94 (0.26-3.38)  | 0.91 (0.34-2.46)  | 1.00                    | 1.00            |       |  |            |            |
| rs7867364  | FREQ        | 9          | Female | 0.15 | 381 | 1.22 (0.74-2.01)      | 0.43       | 1.00       | 1.99 (0.65-6.13)             | 0.60 (0.23-1.58) | 1.47 (0.58-3.74)  | 2.85 (0.98-8.26)  | 0.16                    | 0.77            |       |  |            |            |
| rs7867364  | FREQ        | 9          | Female | 0.15 | 381 | 1.22 (0.74-2.01)      | 0.43       | 1.00       | 0.88 (0.29-2.73)             | 1.53 (0.64-3.63) | 6.46 (1.64-25.54) | 0.92 (0.31-2.69)  | 0.10                    | 0.60            |       |  |            |            |
| rs7867364  | FREQ        | 9          | Female | 0.15 | 381 | 1.22 (0.74-2.01)      | 0.43       | 1.00       | 1.50 (0.45-4.96)             | 0.53 (0.16-1.77) | 0.92 (0.32-2.63)  | 1.75 (0.53-5.85)  | 0.50                    | 1.00            |       |  |            |            |
| rs7867364  | FREQ        | 9          | Female | 0.15 | 381 | 1.22 (0.74-2.01)      | 0.43       | 1.00       | 0.97 (0.31-3.02)             | 1.59 (0.60-4.23) | 2.83 (0.70-11.44) | 1.26 (0.40-4.02)  | 0.70                    | 1.00            |       |  |            |            |
| rs7867364  | FREQ        | 9          | Female | 0.15 | 381 | 1.22 (0.74-2.01)      | 0.43       | 1.00       | 0.48 (0.22-1.08)             | 0.66 (0.33-1.33) | 1.90 (1.00-3.60)  | 1.12 (0.52-2.19)  | 0.03                    | 0.29            |       |  |            |            |
| rs7867364  | FREQ        | 9          | Female | 0.15 | 381 | 1.22 (0.74-2.01)      | 0.43       | 1.00       | 0.92 (0.44-1.92)             | 1.38 (0.77-2.48) | 3.75 (1.25-11.27) | 0.51 (0.25-1.05)  | 0.01                    | 0.12            |       |  |            |            |
| rs7867364  | FREQ        | 9          | Female | 0.15 | 381 | 1.22 (0.74-2.01)      | 0.43       | 1.00       | 3.19 (1.38-7.39)             | 0.48 (0.21-1.08) | 0.73 (0.38-1.41)  | 1.06 (0.49-2.29)  | 7.03 × 10 <sup>-3</sup> | 0.08            |       |  |            |            |
| rs7867364  | FREQ        | 9          | Female | 0.15 | 381 | 1.22 (0.74-2.01)      | 0.43       | 1.00       | 1.09 (0.48-2.51)             | 1.33 (0.69-2.55) | 2.11 (0.80-5.60)  | 0.87 (0.41-1.86)  | 0.55                    | 1.00            |       |  |            |            |
| rs7867364  | FREQ        | 9          | Female | 0.15 | 381 | 1.22 (0.74-2.01)      | 0.43       | 1.00       | 7.24 (1.86-28.17)            | 0.51 (0.21-1.27) | 0.77 (0.31-1.89)  | 0.90 (0.31-2.60)  | 5.91 × 10 <sup>-3</sup> | 0.07            |       |  |            |            |
| rs7867364  | FREQ        | 9          | Female | 0.15 | 381 | 1.22 (0.74-2.01)      | 0.43       | 1.00       | 1.22 (0.44-3.39)             | 1.40 (0.59-3.29) | 3.44 (0.81-14.56) | 1.18 (0.44-3.19)  | 0.63                    | 1.00            |       |  |            |            |
| rs7867364  | FREQ        | 9          | Female | 0.15 | 381 | 1.22 (0.74-2.01)      | 0.43       | 1.00       | 6.33 (1.92-20.85)            | 0.39 (0.14-1.11) | 0.93 (0.37-2.36)  | 1.30 (0.46-3.69)  | 5.70 × 10 <sup>-3</sup> | 0.07            |       |  |            |            |
| rs7867364  | FREQ        | 9          | Female | 0.15 | 381 | 1.22 (0.74-2.01)      | 0.43       | 1.00       | 1.03 (0.33-3.21)             | 0.82 (0.33-2.00) | 1.76 (0.48-6.47)  | 0.71 (0.23-2.18)  | 0.74                    | 1.00            |       |  |            |            |
| rs7867364  | FREQ        | 9          | Female | 0.15 | 381 | 1.22 (0.74-2.01)      | 0.43       | 1.00       | 0.43 (0.14-1.32)             | 1.47 (0.55-3.88) | 0.69 (0.28-1.69)  | 1.50 (0.52-4.33)  | 0.27                    | 0.93            |       |  |            |            |
| rs7867364  | FREQ        | 9          | Female | 0.15 | 381 | 1.22 (0.74-2.01)      | 0.43       | 1.00       | 0.34 (0.12-0.98)             | 0.99 (0.41-2.36) | 0.44 (0.12-1.62)  | 0.96 (0.34-2.71)  | 0.36                    | 0.98            |       |  |            |            |
| rs7867364  | FREQ        | 9          | Female | 0.15 | 381 | 1.22 (0.74-2.01)      | 0.43       | 1.00       | 0.85 (0.23-3.08)             | 0.35 (0.05-2.60) | 1.36 (0.49-3.77)  | 1.07 (0.29-3.90)  | 0.62                    | 1.00            |       |  |            |            |
| rs7867364  | FREQ        | 9          | Female | 0.15 | 381 | 1.22 (0.74-2.01)      | 0.43       | 1.00       | 1.76 (0.69-4.49)             | 1.21 (0.39-3.76) | 2.44 (0.70-8.51)  | 0.85 (0.19-3.80)  | 0.70                    | 1.00            |       |  |            |            |
| rs7867364  | FREQ        | 9          | Female | 0.15 | 381 | 1.22 (0.74-2.01)      | 0.43       | 1.00       | 2.67 (0.82-8.73)             | 0.65 (0.19-2.16) | 1.22 (0.42-3.53)  | 1.55 (0.53-4.56)  | 0.41                    | 0.98            |       |  |            |            |
| rs7867364  | FREQ        | 9          | Female | 0.15 | 381 | 1.22 (0.74-2.01)      | 0.43       | 1.00       | 0.81 (0.21-3.11)             | 0.60 (0.21-1.76) | 1.12 (0.26-4.71)  | 0.39 (0.10-1.45)  | 0.74                    | 1.00            |       |  |            |            |
| rs7867364  | FREQ        | 9          | Female | 0.15 | 381 | 1.22 (0.74-2.01)      | 0.43       | 1.00       | 0.74 (0.30-1.84)             | 1.77 (0.92-3.41) | 0.52 (0.24-1.13)  | 1.27 (0.53-3.01)  | 0.08                    | 0.54            |       |  |            |            |
| rs7867364  | FREQ        | 9          | Female | 0.15 | 381 | 1.22 (0.74-2.01)      | 0.43       | 1.00       | 0.71 (0.31-1.59)             | 0.89 (0.42-1.90) | 0.77 (0.25-2.34)  | 0.95 (0.45-2.04)  | 0.95                    | 1.00            |       |  |            |            |
| rs7867364  | FREQ        | 9          | Female | 0.15 | 381 | 1.22 (0.74-2.01)      | 0.43       | 1.00       | 1.73 (0.55-5.43)             | 0.87 (0.30-2.51) | 0.73 (0.26-2.06)  | 1.28 (0.44-3.72)  | 0.69                    | 1.00            |       |  |            |            |
| rs7867364  | FREQ        | 9          | Female | 0.15 | 381 | 1.22 (0.74-2.01)      | 0.43       | 1.00       | 0.93 (0.28-3.16)             |                  |                   |                   |                         |                 |       |  |            |            |

| SNP        | Gene Region | Chromosome | Gender | MAF  | N   | Marginal Effect  |            |            | Treatment Stratified Effects |                              |                          |                          | Test of Interaction     |            |
|------------|-------------|------------|--------|------|-----|------------------|------------|------------|------------------------------|------------------------------|--------------------------|--------------------------|-------------------------|------------|
|            |             |            |        |      |     | SNP OR (95% CI)  | Observed P | Adjusted P | Placebo<br>SNP OR (95% CI)   | Bupropion<br>SNP OR (95% CI) | Patch<br>SNP OR (95% CI) | Spray<br>SNP OR (95% CI) | Observed P              | Adjusted P |
| rs2519154  | DBH         | 9          | Male   | 0.43 | 386 | 1.17 (0.69-2.00) | 0.56       | 1.00       | 1.00 (0.31-3.25)             | 0.62 (0.23-1.65)             | 1.99 (0.74-5.31)         | 1.48 (0.44-5.00)         | 0.40                    | 0.96       |
|            |             |            | Female | 0.40 | 402 | 1.58 (0.91-2.73) | 0.10       | 0.75       | 1.31 (0.45-3.83)             | 1.74 (0.69-4.39)             | 1.23 (0.30-5.14)         | 1.91 (0.62-5.83)         | 0.94                    | 1.00       |
| rs2797853  | DBH         | 9          | Male   | 0.35 | 385 | 0.99 (0.60-1.63) | 0.98       | 0.98       | 5.89 (1.24-27.90)            | 0.70 (0.28-1.74)             | 0.40 (0.16-0.99)         | 1.56 (0.53-4.64)         | 7.31 × 10 <sup>-3</sup> | 0.08       |
|            |             |            | Female | 0.37 | 403 | 0.87 (0.52-1.44) | 0.59       | 0.99       | 1.14 (0.40-3.23)             | 1.05 (0.43-2.53)             | 0.37 (0.10-1.37)         | 0.89 (0.32-2.46)         | 0.54                    | 1.00       |
| rs6479643  | DBH         | 9          | Male   | 0.36 | 386 | 1.18 (0.82-1.69) | 0.37       | 0.99       | 0.92 (0.43-1.95)             | 0.82 (0.42-1.60)             | 1.55 (0.73-3.28)         | 1.84 (0.87-3.91)         | 0.32                    | 0.94       |
|            |             |            | Female | 0.38 | 403 | 1.10 (0.77-1.58) | 0.60       | 0.98       | 1.17 (0.58-2.36)             | 1.16 (0.52-2.17)             | 1.08 (0.44-2.62)         | 0.99 (0.48-2.04)         | 0.99                    | 0.99       |
| rs77905    | DBH         | 9          | Male   | 0.46 | 383 | 1.07 (0.76-1.50) | 0.71       | 1.00       | 1.04 (0.50-2.15)             | 0.72 (0.38-1.39)             | 1.01 (0.54-1.91)         | 2.03 (0.94-4.41)         | 0.24                    | 0.86       |
|            |             |            | Female | 0.48 | 403 | 1.01 (0.72-1.43) | 0.94       | 1.00       | 1.29 (0.59-2.83)             | 0.85 (0.48-1.51)             | 1.44 (0.59-3.54)         | 0.88 (0.45-1.73)         | 0.68                    | 1.00       |
| rs2097628  | DBH         | 9          | Male   | 0.03 | NA  | NA               | NA         | NA         | NA                           | NA                           | NA                       | NA                       | NA                      | NA         |
|            |             |            | Female | 0.02 | NA  | NA               | NA         | NA         | NA                           | NA                           | NA                       | NA                       | NA                      | NA         |
| rs2073833  | DBH         | 9          | Male   | 0.40 | 352 | 1.13 (0.67-1.92) | 0.65       | 1.00       | 1.24 (0.34-4.50)             | 0.90 (0.35-2.35)             | 0.82 (0.32-2.11)         | 2.39 (0.69-8.28)         | 0.54                    | 0.98       |
|            |             |            | Female | 0.41 | 379 | 1.18 (0.69-2.03) | 0.54       | 0.99       | 0.86 (0.29-2.55)             | 0.90 (0.37-2.18)             | 3.02 (0.59-15.50)        | 1.45 (0.51-4.13)         | 0.52                    | 0.99       |
| rs6271     | DBH         | 9          | Male   | 0.08 | 384 | 0.68 (0.33-1.42) | 0.29       | 0.99       | NA                           | 0.86 (0.24-3.03)             | 0.38 (0.08-1.81)         | 2.10 (0.57-7.76)         | 0.08                    | 0.48       |
|            |             |            | Female | 0.08 | 400 | 0.62 (0.28-1.38) | 0.22       | 0.92       | 0.41 (0.05-3.42)             | 0.75 (0.23-2.51)             | 0.40 (0.05-3.44)         | 0.79 (0.16-3.95)         | 0.92                    | 1.00       |
| rs10993948 | DBH         | 9          | Male   | 0.03 | NA  | NA               | NA         | NA         | NA                           | NA                           | NA                       | NA                       | NA                      | NA         |
|            |             |            | Female | 0.02 | NA  | NA               | NA         | NA         | NA                           | NA                           | NA                       | NA                       | NA                      | NA         |
| rs10993949 | DBH         | 9          | Male   | 0.03 | NA  | NA               | NA         | NA         | NA                           | NA                           | NA                       | NA                       | NA                      | NA         |
|            |             |            | Female | 0.02 | NA  | NA               | NA         | NA         | NA                           | NA                           | NA                       | NA                       | NA                      | NA         |
| rs3025425  | DBH         | 9          | Male   | 0.03 | NA  | NA               | NA         | NA         | NA                           | NA                           | NA                       | NA                       | NA                      | NA         |
|            |             |            | Female | 0.02 | NA  | NA               | NA         | NA         | NA                           | NA                           | NA                       | NA                       | NA                      | NA         |
| rs129883   | DBH         | 9          | Male   | 0.34 | 386 | 0.83 (0.51-1.35) | 0.45       | 1.00       | 0.95 (0.32-2.86)             | 0.72 (0.29-1.79)             | 1.09 (0.45-2.66)         | 0.61 (0.21-1.72)         | 0.83                    | 0.99       |
|            |             |            | Female | 0.37 | 403 | 1.01 (0.60-1.70) | 0.97       | 0.97       | 2.11 (0.69-6.47)             | 1.21 (0.48-3.08)             | 0.34 (0.09-1.29)         | 0.82 (0.30-2.21)         | 0.19                    | 0.75       |
| rs129915   | DBH         | 9          | Male   | 0.27 | 358 | 1.17 (0.71-1.93) | 0.54       | 1.00       | 1.05 (0.33-3.36)             | 0.74 (0.29-1.88)             | 1.47 (0.59-3.64)         | 1.75 (0.57-5.31)         | 0.64                    | 0.99       |
|            |             |            | Female | 0.29 | 373 | 1.65 (0.97-2.80) | 0.06       | 0.61       | 1.51 (0.50-4.58)             | 1.86 (0.75-4.61)             | 2.96 (0.70-12.52)        | 1.13 (0.41-3.08)         | 0.73                    | 1.00       |
| rs129884   | DBH         | 9          | Male   | 0.17 | 386 | 1.25 (0.80-1.96) | 0.33       | 0.99       | 0.49 (0.15-1.57)             | 1.60 (0.71-3.57)             | 1.48 (0.64-3.46)         | 1.50 (0.63-3.73)         | 0.33                    | 0.93       |
|            |             |            | Female | 0.17 | 402 | 1.10 (0.68-1.78) | 0.71       | 0.99       | 0.09 (0.39-0.96)             | 0.85 (0.35-2.05)             | 1.43 (0.48-4.00)         | 1.24 (0.50-3.07)         | 0.89                    | 1.00       |
| rs129886   | DBH         | 9          | Male   | 0.18 | 384 | 1.36 (0.87-2.12) | 0.18       | 0.93       | 0.71 (0.24-2.15)             | 1.95 (0.88-4.33)             | 1.46 (0.65-3.25)         | 1.47 (0.73-3.11)         | 0.52                    | 0.99       |
|            |             |            | Female | 0.18 | 401 | 0.76 (0.46-1.25) | 0.27       | 0.95       | 0.90 (0.35-2.28)             | 0.50 (0.19-1.37)             | 0.79 (0.21-2.90)         | 0.95 (0.37-2.42)         | 0.79                    | 1.00       |
| rs2073835  | DBH         | 9          | Male   | 0.29 | 354 | 0.99 (0.65-1.49) | 0.96       | 1.00       | 0.82 (0.31-2.17)             | 0.64 (0.29-1.41)             | 0.87 (0.40-1.91)         | 2.32 (0.96-5.62)         | 0.16                    | 0.74       |
|            |             |            | Female | 0.31 | 378 | 1.34 (0.92-1.94) | 0.13       | 0.83       | 1.06 (0.49-2.02)             | 1.70 (0.86-3.37)             | 1.45 (0.62-3.62)         | 1.33 (0.61-2.89)         | 0.76                    | 1.00       |
| rs12244716 | CALY        | 10         | Male   | 0.14 | 384 | 0.62 (0.36-1.08) | 0.08       | 0.22       | 0.83 (0.26-2.65)             | 0.73 (0.27-2.01)             | 0.72 (0.26-2.08)         | 0.27 (0.06-1.23)         | 0.61                    | 0.69       |
|            |             |            | Female | 0.12 | 401 | 0.77 (0.42-1.39) | 0.37       | 0.45       | 0.29 (0.07-1.30)             | 1.55 (0.61-3.95)             | 1.28 (0.39-4.20)         | 0.22 (0.03-1.80)         | 0.09                    | 0.21       |
| rs2275723  | CALY        | 10         | Male   | 0.10 | 384 | 0.62 (0.32-1.21) | 0.15       | 0.34       | 0.95 (0.25-3.52)             | 0.62 (0.18-2.07)             | 0.79 (0.24-2.64)         | 0.24 (0.03-1.79)         | 0.64                    | 0.64       |
|            |             |            | Female | 0.09 | 399 | 0.73 (0.36-1.45) | 0.33       | 0.66       | 0.19 (0.02-1.48)             | 1.89 (0.73-4.90)             | 0.77 (0.12-5.03)         | 0.24 (0.03-1.79)         | 0.02                    | 0.06       |
| rs2298122  | CALY        | 10         | Male   | 0.19 | 354 | 0.78 (0.45-1.35) | 0.37       | 0.62       | 0.27 (0.05-1.31)             | 1.02 (0.39-2.68)             | 1.11 (0.41-2.96)         | 0.68 (0.19-2.38)         | 0.41                    | 0.58       |
|            |             |            | Female | 0.17 | 378 | 0.64 (0.36-1.16) | 0.13       | 0.36       | 0.42 (0.13-1.38)             | 1.40 (0.58-3.41)             | 0.57 (0.11-2.91)         | 0.15 (0.02-1.22)         | 0.11                    | 0.21       |
| rs11101694 | CALY        | 10         | Male   | 0.13 | 353 | 0.42 (0.21-0.85) | 0.01       | 0.04       | 0.26 (0.02-1.62)             | 0.62 (0.20-1.90)             | 0.59 (0.18-1.95)         | 0.18 (0.02-1.45)         | 0.54                    | 0.69       |
|            |             |            | Female | 0.12 | 379 | 0.84 (0.44-1.59) | 0.59       | 0.59       | 0.27 (0.06-1.29)             | 2.01 (0.79-5.13)             | 1.05 (0.20-5.54)         | 0.27 (0.03-2.32)         | 0.06                    | 0.17       |
| rs10776672 | CALY        | 10         | Male   | 0.11 | 385 | 1.27 (0.71-2.28) | 0.43       | 0.63       | 0.38 (0.08-1.85)             | 2.12 (0.69-6.52)             | 1.81 (0.66-4.92)         | 1.06 (0.26-4.26)         | 0.25                    | 0.53       |
|            |             |            | Female | 0.10 | 403 | 0.94 (0.62-1.46) | 0.37       | 0.65       | 1.57 (0.49-5.06)             | 0.43 (0.12-1.56)             | 0.71 (0.14-3.67)         | 0.58 (0.12-2.85)         | 0.51                    | 0.51       |
| rs4838721  | CALY        | 10         | Male   | 0.19 | 386 | 0.97 (0.62-1.53) | 0.90       | 0.90       | 0.70 (0.24-2.04)             | 1.33 (0.57-3.08)             | 1.44 (0.65-3.21)         | 0.48 (0.16-1.46)         | 0.31                    | 0.57       |
|            |             |            | Female | 0.17 | 403 | 0.74 (0.44-1.23) | 0.23       | 0.51       | 0.58 (0.21-1.61)             | 1.17 (0.52-2.64)             | 1.07 (0.37-3.11)         | 0.15 (0.02-1.17)         | 0.14                    | 0.23       |
| rs7932167  | DRD4        | 11         | Male   | 0.23 | 385 | 0.94 (0.57-1.55) | 0.81       | 0.81       | 1.24 (0.40-3.84)             | 0.72 (0.29-1.78)             | 1.62 (0.69-3.95)         | 0.41 (0.11-1.56)         | 0.30                    | 0.69       |
|            |             |            | Female | 0.21 | 402 | 1.28 (0.77-2.13) | 0.35       | 0.80       | 2.10 (0.75-5.90)             | 0.98 (0.40-2.41)             | 0.84 (0.22-3.16)         | 1.46 (0.53-4.01)         | 0.65                    | 0.93       |
| rs12280580 | DRD4        | 11         | Male   | 0.30 | 386 | 1.18 (0.72-1.91) | 0.51       | 0.93       | 0.27 (0.08-0.87)             | 1.14 (0.46-2.81)             | 2.59 (1.04-6.48)         | 1.56 (0.54-4.49)         | 0.02                    | 0.99       |
|            |             |            | Female | 0.28 | 403 | 1.38 (0.82-2.30) | 0.22       | 0.80       | 0.83 (0.30-2.29)             | 2.56 (1.08-6.08)             | 1.44 (0.40-5.20)         | 0.92 (0.34-2.54)         | 0.32                    | 0.72       |
| rs4987059  | DRD4        | 11         | Male   | 0.06 | 385 | 0.71 (0.32-1.58) | 0.39       | 0.97       | 0.55 (0.06-4.74)             | 0.72 (0.14-3.75)             | 0.66 (0.18-2.41)         | 0.95 (0.19-4.87)         | 0.98                    | 0.98       |
|            |             |            | Female | 0.05 | 403 | 1.56 (0.74-3.30) | 0.25       | 0.80       | 2.11 (0.50-8.96)             | 1.36 (0.38-4.83)             | 1.50 (0.28-8.16)         | 1.43 (0.26-7.83)         | 0.97                    | 0.97       |
| rs936441   | DRD4        | 11         | Male   | 0.36 | 370 | 0.88 (0.62-1.26) | 0.49       | 0.95       | 1.10 (0.47-2.55)             | 0.86 (0.45-1.64)             | 0.83 (0.43-1.57)         | 0.83 (0.37-1.88)         | 0.96                    | 1.00       |
|            |             |            | Female | 0.36 | 386 | 1.53 (1.03-2.27) | 0.04       | 0.26       | 1.62 (0.71-3.70)             | 1.80 (0.92-3.51)             | 2.43 (0.86-6.85)         | 0.85 (0.38-1.93)         | 0.38                    | 0.81       |
| rs1800443  | DRD4        | 11         | Male   | 0.00 | NA  | NA               | NA         | NA         | NA                           | NA                           | NA                       | NA                       | NA                      | NA         |
|            |             |            | Female | 0.00 | NA  | NA               | NA         | NA         | NA                           | NA                           | NA                       | NA                       | NA                      | NA         |
| rs11246226 | DRD4        | 11         | Male   | 0.50 | 345 | 0.89 (0.62-1.28) | 0.52       | 0.89       | 0.48 (0.19-1.20)             | 0.59 (0.29-1.20)             | 1.82 (0.93-3.54)         | 0.85 (0.39-1.88)         | 0.05                    | 0.21       |
|            |             |            | Female | 0.48 | 371 | 1.30 (0.90-1.88) | 0.17       | 0.73       | 1.28 (0.62-2.67)             | 0.86 (0.45-1.61)             | 2.96 (1.10-7.94)         | 1.39 (0.63-3.11)         | 0.20                    | 0.55       |
| rs936465   | DRD4        | 11         | Male   | 0.47 | 341 | 0.75 (0.43-1.32) | 0.32       | 0.96       | 0.47 (0.13-1.65)             | 0.51 (0.19-1.36)             | 1.59 (0.55-4.56)         | 0.69 (0.18-2.64)         | 0.36                    | 0.74       |
|            |             |            | Female | 0.45 | 369 | 2.01 (1.07-3.75) | 0.02       | 0.18       | 1.73 (0.51-5.85)             | 1.45 (0.57-3.70)             | 5.34 (0.63-45.33)        | 2.88 (0.60-13.80)        | 0.65                    | 0.96       |
| rs10902188 | DRD4        | 11         | Male   | 0.09 | 386 | 0.77 (0.40-1.45) | 0.41       | 0.96       | 1.44 (0.39-5.26)             | 1.11 (0.43-2.84)             | 0.42 (0.11-1.55)         | NA                       | 0.17                    | 0.51       |
|            |             |            | Female | 0.09 | 403 | 1.08 (0.57-2.06) | 0.81       | 0.96       | 1.35 (0.39-4.71)             | 1.44 (0.45-4.58)             | 2.02 (0.46-8.88)         | 0.40 (0.09-1.82)         | 0.38                    | 0.75       |
| rs6598007  | DRD4        | 11         | Male   | 0.06 | 386 | 0.69 (0.31-1.56) | 0.36       | 0.97       | 1.25 (0.24-6.20)             | 0.43 (0.09-2.09)             | 0.45 (0.09-2.16)         | 1.53 (0.28-8.38)         | 0.60                    | 0.92       |
|            |             |            | Female | 0.06 | 403 | 1.48 (0.73-3.00) | 0.28       | 0.78       | 1.37 (0.34-5.53)             | 1.69 (0.55-5.14)             | 0.83 (0.09-7.51)         | 1.77 (0.41-7.63)         | 0.93                    | 0.99       |
| rs4963126  | DRD4        | 11         | Male   | 0.45 | 386 | 0.90 (0.53-1.53) | 0.70       | 0.91       | 0.57 (0.21-2.07)             | 0.96 (0.34-2.69)             | 0.69 (0.26-1.78)         | 1.65 (0.49-5.58)         | 0.66                    | 0.92       |
|            |             |            | Female | 0.49 | 402 | 0.97 (0.55-1.71) | 0.92       | 0.92       | 1.18 (0.38-3.66)             | 0.86 (0.32-2.33)             | 0.66 (0.17-2.52)         | 1.20 (0.38-3.73)         | 0.89                    | 1.00       |
| rs11603404 | DRD4        | 11         | Male   | 0.13 | 386 | 1.25 (0.72-2.17) | 0.44       | 0.95       | 0.44 (0.11-1.69)             | 1.81 (0.67-4.85)             | 1.30 (0.40-4.25)         | 1.77 (0.60-5.22)         | 0.31                    | 0.70       |
|            |             |            | Female | 0.14 | 403 | 0.79 (0.44-1.42) | 0.43       | 0.79       | 0.62 (0.18-2.06)             | 1.22 (0.49-3.06)             | 0.74 (0.18-3.09)         | 0.43 (0.09-2.06)         | 0.64                    | 0.95       |
| rs100446   | TH          | 11         | Male   | 0.37 | 385 | 1.19 (0.72-1.96) | 0.50       | 1.00       | 2.43 (0.63-9.35)             | 0.85 (0.34-2.09)             | 0.72 (0.29-1.77)         | 2.46 (0.74-8.24)         | 0.22                    | 0.55       |
|            |             |            | Female | 0.38 | 403 | 1.42 (0.84-2.41) | 0.19       | 0.80       | 2.08 (0.68-6.35)             | 0.92 (0.38-2.23)             | 1.49 (0.36-6.17)         | 1.70 (0.62-4.68)         | 0.69                    | 0.97       |
| rs79243    |             |            |        |      |     |                  |            |            |                              |                              |                          |                          |                         |            |

| SNP        | Gene Region  | Chromosome | Gender | MAF                    | N   | Marginal Effect       |            |            | Treatment Stratified Effects |                  |                   |                   | Test of Interaction |                 |       |  |            |            |
|------------|--------------|------------|--------|------------------------|-----|-----------------------|------------|------------|------------------------------|------------------|-------------------|-------------------|---------------------|-----------------|-------|--|------------|------------|
|            |              |            |        |                        |     | Likelihood ratio test |            |            | Placebo                      |                  | Bupropion         |                   | Patch               |                 | Spray |  | Observed P | Adjusted P |
|            |              |            |        |                        |     | SNP OR (95% CI)       | Observed P | Adjusted P | SNP OR (95% CI)              | SNP OR (95% CI)  | SNP OR (95% CI)   | SNP OR (95% CI)   | SNP OR (95% CI)     | SNP OR (95% CI) |       |  |            |            |
| rs6265     | <i>BDNF</i>  | 11         | Male   | 0.19                   | 386 | 0.82 (0.52-1.30)      | 0.39       | 0.96       | 0.86 (0.34-2.15)             | 0.78 (0.31-1.92) | 0.57 (0.23-1.39)  | 1.34 (0.52-3.46)  | 0.65                | 0.98            |       |  |            |            |
|            |              |            | Female | 0.18                   | 403 | 0.98 (0.62-1.56)      | 0.95       | 1.00       | 0.52 (0.17-1.56)             | 1.88 (0.84-4.21) | 0.37 (0.08-1.67)  | 1.24 (0.53-2.86)  | 0.10                | 0.39            |       |  |            |            |
| rs11030101 | <i>BDNF</i>  | 11         | Male   | 0.46                   | 385 | 0.95 (0.56-1.63)      | 0.86       | 0.98       | 0.86 (0.26-2.81)             | 1.03 (0.36-2.89) | 1.55 (0.55-4.36)  | 0.52 (0.17-1.54)  | 0.55                | 0.98            |       |  |            |            |
|            |              |            | Female | 0.48                   | 403 | 1.01 (0.55-1.86)      | 0.97       | 1.00       | 0.87 (0.25-2.99)             | 0.77 (0.27-2.22) | 2.16 (0.43-10.89) | 1.00 (0.32-3.13)  | 0.74                | 0.96            |       |  |            |            |
| rs11030104 | <i>BDNF</i>  | 11         | Male   | 0.21                   | 386 | 0.82 (0.52-1.27)      | 0.37       | 0.96       | 0.98 (0.41-2.34)             | 0.73 (0.29-1.79) | 0.50 (0.21-1.22)  | 1.31 (0.54-3.15)  | 0.48                | 0.95            |       |  |            |            |
|            |              |            | Female | 0.20                   | 403 | 1.01 (0.66-1.56)      | 0.95       | 1.00       | 0.62 (0.23-1.65)             | 1.93 (0.87-4.27) | 0.29 (0.07-1.30)  | 1.39 (0.64-3.01)  | 0.05                | 0.25            |       |  |            |            |
| rs1401635  | <i>BDNF</i>  | 11         | Male   | 0.30                   | 385 | 1.09 (0.67-1.77)      | 0.73       | 1.00       | 0.56 (0.18-1.71)             | 1.33 (0.54-3.27) | 1.03 (0.42-2.50)  | 1.68 (0.56-5.01)  | 0.53                | 0.97            |       |  |            |            |
|            |              |            | Female | 0.27                   | 403 | 1.08 (0.66-1.79)      | 0.75       | 1.00       | 1.42 (0.51-3.93)             | 0.97 (0.42-2.24) | 2.87 (0.70-11.78) | 0.57 (0.21-1.57)  | 0.27                | 0.67            |       |  |            |            |
| rs12291063 | <i>BDNF</i>  | 11         | Male   | 1.27 × 10 <sup>3</sup> | NA  | NA                    | NA         | NA         | NA                           | NA               | NA                | NA                | NA                  | NA              |       |  |            |            |
|            |              |            | Female | 3.71 × 10 <sup>3</sup> | NA  | NA                    | NA         | NA         | NA                           | NA               | NA                | NA                | NA                  | NA              |       |  |            |            |
| rs2049045  | <i>BDNF</i>  | 11         | Male   | 0.19                   | 386 | 0.78 (0.49-1.24)      | 0.29       | 0.90       | 0.70 (0.27-1.84)             | 0.78 (0.31-1.92) | 0.57 (0.23-1.39)  | 1.34 (0.52-3.46)  | 0.64                | 0.98            |       |  |            |            |
|            |              |            | Female | 0.17                   | 403 | 0.93 (0.58-1.49)      | 0.75       | 1.00       | 0.53 (0.18-1.61)             | 1.88 (0.84-4.21) | 0.21 (0.03-1.56)  | 1.13 (0.46-2.75)  | 0.06                | 0.28            |       |  |            |            |
| rs11030107 | <i>BDNF</i>  | 11         | Male   | 0.26                   | 377 | 1.12 (0.75-1.68)      | 0.59       | 1.00       | 0.45 (0.14-1.47)             | 1.20 (0.57-2.50) | 1.12 (0.56-2.27)  | 1.91 (0.78-4.67)  | 0.26                | 0.78            |       |  |            |            |
|            |              |            | Female | 0.22                   | 396 | 0.92 (0.59-1.44)      | 0.72       | 1.00       | 0.75 (0.26-2.16)             | 0.69 (0.32-1.47) | 2.65 (0.95-7.39)  | 0.75 (0.30-1.84)  | 0.16                | 0.48            |       |  |            |            |
| rs10835210 | <i>BDNF</i>  | 11         | Male   | 0.42                   | 386 | 1.07 (0.63-1.80)      | 0.81       | 1.00       | 1.44 (0.45-4.59)             | 1.27 (0.46-3.54) | 1.09 (0.42-2.84)  | 0.64 (0.22-1.87)  | 0.74                | 0.98            |       |  |            |            |
|            |              |            | Female | 0.48                   | 403 | 0.83 (0.48-1.45)      | 0.52       | 0.99       | 0.80 (0.25-2.51)             | 0.78 (0.29-2.13) | 1.08 (0.29-4.07)  | 0.78 (0.27-2.32)  | 0.98                | 0.98            |       |  |            |            |
| rs7103873  | <i>BDNF</i>  | 11         | Male   | 0.46                   | 386 | 0.97 (0.56-1.66)      | 0.90       | 0.99       | 0.86 (0.26-2.81)             | 1.02 (0.36-2.87) | 1.55 (0.55-4.34)  | 0.56 (0.19-1.66)  | 0.61                | 0.97            |       |  |            |            |
|            |              |            | Female | 0.48                   | 403 | 1.01 (0.55-1.86)      | 0.96       | 1.00       | 0.82 (0.24-2.83)             | 0.77 (0.27-2.22) | 2.32 (0.46-11.71) | 1.00 (0.32-3.13)  | 0.68                | 0.97            |       |  |            |            |
| rs6484320  | <i>BDNF</i>  | 11         | Male   | 0.22                   | 386 | 0.77 (0.50-1.20)      | 0.24       | 0.86       | 0.98 (0.41-2.33)             | 0.68 (0.27-1.68) | 0.50 (0.21-1.19)  | 1.12 (0.47-2.64)  | 0.57                | 0.98            |       |  |            |            |
|            |              |            | Female | 0.20                   | 403 | 1.04 (0.68-1.58)      | 0.86       | 1.00       | 0.62 (0.23-1.65)             | 1.84 (0.86-3.97) | 0.30 (0.07-1.29)  | 1.47 (0.71-3.05)  | 0.04                | 0.24            |       |  |            |            |
| rs1013402  | <i>BDNF</i>  | 11         | Male   | 0.31                   | 386 | 1.09 (0.76-1.58)      | 0.64       | 1.00       | 0.98 (0.41-2.34)             | 1.25 (0.66-2.37) | 0.84 (0.42-1.71)  | 1.36 (0.62-2.99)  | 0.79                | 0.90            |       |  |            |            |
|            |              |            | Female | 0.27                   | 402 | 1.01 (0.67-1.52)      | 0.96       | 1.00       | 1.45 (0.64-3.26)             | 0.84 (0.41-1.71) | 2.45 (0.85-7.06)  | 0.52 (0.22-1.25)  | 0.10                | 0.35            |       |  |            |            |
| rs988748   | <i>BDNF</i>  | 11         | Male   | 0.22                   | 386 | 0.77 (0.50-1.20)      | 0.24       | 0.86       | 0.98 (0.41-2.33)             | 0.68 (0.27-1.68) | 0.50 (0.21-1.19)  | 1.12 (0.47-2.64)  | 0.57                | 0.98            |       |  |            |            |
|            |              |            | Female | 0.21                   | 403 | 1.03 (0.68-1.57)      | 0.89       | 1.00       | 0.59 (0.22-1.59)             | 1.84 (0.86-3.96) | 0.30 (0.07-1.29)  | 1.47 (0.71-3.05)  | 0.04                | 0.22            |       |  |            |            |
| rs10767664 | <i>BDNF</i>  | 11         | Male   | 0.22                   | 384 | 0.76 (0.49-1.19)      | 0.22       | 0.84       | 1.04 (0.43-2.51)             | 0.68 (0.27-1.68) | 0.45 (0.18-1.11)  | 1.12 (0.47-2.65)  | 0.45                | 0.93            |       |  |            |            |
|            |              |            | Female | 0.20                   | 403 | 1.04 (0.68-1.58)      | 0.86       | 1.00       | 0.62 (0.23-1.65)             | 1.84 (0.86-3.97) | 0.30 (0.07-1.29)  | 1.47 (0.71-3.05)  | 0.04                | 0.24            |       |  |            |            |
| rs2030324  | <i>BDNF</i>  | 11         | Male   | 0.48                   | 385 | 0.69 (0.39-1.20)      | 0.19       | 0.80       | 0.82 (0.23-2.91)             | 0.73 (0.25-2.09) | 0.34 (0.12-0.94)  | 1.49 (0.38-5.80)  | 0.35                | 0.87            |       |  |            |            |
|            |              |            | Female | 0.47                   | 403 | 1.03 (0.58-1.82)      | 0.92       | 1.00       | 0.62 (0.21-1.78)             | 1.43 (0.57-3.60) | 2.56 (0.30-21.72) | 0.74 (0.23-2.38)  | 0.47                | 0.89            |       |  |            |            |
| rs11030119 | <i>BDNF</i>  | 11         | Male   | 0.29                   | 386 | 1.12 (0.69-1.81)      | 0.66       | 1.00       | 0.65 (0.21-1.98)             | 1.16 (0.47-2.83) | 1.06 (0.44-2.58)  | 1.91 (0.64-5.68)  | 0.59                | 0.99            |       |  |            |            |
|            |              |            | Female | 0.26                   | 403 | 0.99 (0.60-1.64)      | 0.98       | 0.98       | 1.10 (0.39-3.06)             | 0.92 (0.39-2.16) | 2.48 (0.60-10.19) | 0.62 (0.22-1.65)  | 0.43                | 0.85            |       |  |            |            |
| rs7934165  | <i>BDNF</i>  | 11         | Male   | 0.48                   | 384 | 0.68 (0.39-1.19)      | 0.18       | 0.77       | 0.82 (0.23-2.92)             | 0.69 (0.24-1.99) | 0.35 (0.13-0.95)  | 1.46 (0.38-5.67)  | 0.37                | 0.89            |       |  |            |            |
|            |              |            | Female | 0.47                   | 400 | 1.05 (0.59-1.85)      | 0.88       | 1.00       | 0.61 (0.21-1.77)             | 1.48 (0.59-3.73) | 2.55 (0.30-21.69) | 0.62 (0.23-1.43)  | 0.46                | 0.88            |       |  |            |            |
| rs11030121 | <i>BDNF</i>  | 11         | Male   | 0.30                   | 385 | 1.07 (0.74-1.55)      | 0.71       | 1.00       | 1.01 (0.44-2.35)             | 1.03 (0.53-1.98) | 0.93 (0.45-1.92)  | 1.39 (0.65-2.96)  | 0.89                | 0.89            |       |  |            |            |
|            |              |            | Female | 0.27                   | 403 | 0.96 (0.64-1.45)      | 0.86       | 1.00       | 1.27 (0.55-2.96)             | 0.80 (0.40-1.62) | 2.67 (0.87-8.23)  | 0.54 (0.23-1.30)  | 0.12                | 0.39            |       |  |            |            |
| rs12273363 | <i>BDNF</i>  | 11         | Male   | 0.20                   | 381 | 1.15 (0.73-1.80)      | 0.55       | 0.99       | 0.86 (0.30-2.48)             | 0.92 (0.39-2.20) | 1.27 (0.56-2.85)  | 1.62 (0.66-3.96)  | 0.76                | 0.96            |       |  |            |            |
|            |              |            | Female | 0.16                   | 400 | 1.09 (0.68-1.75)      | 0.73       | 1.00       | 1.14 (0.38-3.42)             | 1.00 (0.43-2.29) | 1.79 (0.66-4.83)  | 0.78 (0.29-2.04)  | 0.69                | 0.98            |       |  |            |            |
| rs908867   | <i>BDNF</i>  | 11         | Male   | 0.09                   | 385 | 1.07 (0.60-1.91)      | 0.82       | 1.00       | 1.26 (0.44-3.60)             | 1.51 (0.50-4.57) | 0.45 (0.09-2.13)  | 1.12 (0.37-3.42)  | 0.60                | 0.98            |       |  |            |            |
|            |              |            | Female | 0.10                   | 403 | 0.97 (0.53-1.78)      | 0.92       | 1.00       | 1.58 (0.56-4.44)             | 0.60 (0.19-1.90) | 2.08 (0.47-9.23)  | 0.59 (0.15-2.27)  | 0.39                | 0.84            |       |  |            |            |
| rs1491850  | <i>BDNF</i>  | 11         | Male   | 0.43                   | 384 | 0.89 (0.62-1.28)      | 0.53       | 0.99       | 0.83 (0.34-1.98)             | 0.84 (0.40-1.76) | 0.71 (0.37-1.34)  | 1.34 (0.65-2.79)  | 0.62                | 0.98            |       |  |            |            |
|            |              |            | Female | 0.37                   | 402 | 1.11 (0.77-1.58)      | 0.59       | 1.00       | 0.97 (0.46-2.02)             | 1.58 (0.84-2.96) | 0.75 (0.33-1.74)  | 1.06 (0.51-2.19)  | 0.54                | 0.92            |       |  |            |            |
| rs2049048  | <i>BDNF</i>  | 11         | Male   | 0.16                   | 386 | 1.03 (0.60-1.75)      | 0.93       | 0.93       | 1.14 (0.35-3.72)             | 2.44 (0.91-6.54) | 0.54 (0.18-1.60)  | 0.69 (0.22-2.16)  | 0.18                | 0.64            |       |  |            |            |
|            |              |            | Female | 0.13                   | 403 | 0.62 (0.33-1.17)      | 0.13       | 0.65       | 0.64 (0.17-2.42)             | 0.52 (0.18-1.51) | 0.39 (0.05-3.31)  | 0.88 (0.28-2.73)  | 0.88                | 0.98            |       |  |            |            |
| rs11214589 | <i>ANKK1</i> | 11         | Male   | 0.48                   | 367 | 0.68 (0.39-1.18)      | 0.17       | 0.93       | 0.63 (0.17-2.32)             | 0.40 (0.15-1.10) | 0.58 (0.22-1.51)  | 2.52 (0.52-12.26) | 0.22                | 0.83            |       |  |            |            |
|            |              |            | Female | 0.49                   | 383 | 1.32 (0.70-2.49)      | 0.38       | 0.99       | 0.97 (0.31-3.10)             | 2.24 (0.70-7.19) | 0.51 (0.13-2.00)  | 2.21 (0.45-10.71) | 0.35                | 0.90            |       |  |            |            |
| rs4938010  | <i>ANKK1</i> | 11         | Male   | 0.14                   | 386 | 0.68 (0.38-1.22)      | 0.19       | 0.94       | 0.44 (0.11-1.69)             | 0.72 (0.23-2.26) | 0.99 (0.36-2.68)  | 0.55 (0.14-2.11)  | 0.79                | 1.00            |       |  |            |            |
|            |              |            | Female | 0.15                   | 403 | 1.33 (0.76-2.30)      | 0.32       | 0.99       | 2.85 (1.00-8.12)             | 1.75 (0.70-4.37) | 0.59 (0.12-3.00)  | 0.52 (0.14-1.96)  | 0.13                | 0.53            |       |  |            |            |
| rs754672   | <i>ANKK1</i> | 11         | Male   | 0.46                   | 386 | 0.67 (0.40-1.12)      | 0.13       | 0.87       | 0.76 (0.23-2.52)             | 0.34 (0.13-0.88) | 1.45 (0.52-4.08)  | 0.57 (0.20-1.65)  | 0.22                | 0.82            |       |  |            |            |
|            |              |            | Female | 0.48                   | 402 | 0.76 (0.44-1.32)      | 0.33       | 0.99       | 1.05 (0.31-3.57)             | 0.49 (0.20-1.20) | 0.63 (0.16-2.40)  | 1.25 (0.40-3.86)  | 0.56                | 0.98            |       |  |            |            |
| rs8397584  | <i>ANKK1</i> | 11         | Male   | 0.34                   | 385 | 1.01 (0.62-1.64)      | 0.97       | 1.00       | 1.07 (0.36-3.21)             | 0.53 (0.21-1.31) | 2.22 (0.86-6.59)  | 0.81 (0.29-2.30)  | 0.18                | 0.74            |       |  |            |            |
|            |              |            | Female | 0.34                   | 401 | 0.79 (0.48-1.31)      | 0.36       | 0.96       | 0.88 (0.32-2.47)             | 0.31 (0.13-0.76) | 1.79 (0.48-6.71)  | 1.53 (0.55-4.28)  | 0.05                | 0.30            |       |  |            |            |
| rs10891545 | <i>ANKK1</i> | 11         | Male   | 0.13                   | 386 | 0.71 (0.41-1.25)      | 0.22       | 0.96       | 0.71 (0.23-2.24)             | 0.57 (0.18-1.86) | 0.88 (0.35-2.21)  | 0.63 (0.16-2.43)  | 0.95                | 1.00            |       |  |            |            |
|            |              |            | Female | 0.15                   | 403 | 1.14 (0.70-1.85)      | 0.61       | 1.00       | 1.71 (0.73-4.00)             | 1.37 (0.60-3.14) | 0.91 (0.25-3.28)  | 0.48 (0.13-1.73)  | 0.36                | 0.91            |       |  |            |            |
| rs4938012  | <i>ANKK1</i> | 11         | Male   | 0.33                   | 386 | 1.00 (0.62-1.63)      | 0.98       | 1.00       | 1.09 (0.36-3.26)             | 0.58 (0.24-1.44) | 1.84 (0.73-4.62)  | 0.87 (0.31-2.46)  | 0.36                | 0.95            |       |  |            |            |
|            |              |            | Female | 0.33                   | 402 | 0.76 (0.46-1.25)      | 0.27       | 0.98       | 0.86 (0.31-2.42)             | 0.27 (0.11-0.65) | 1.94 (0.52-7.26)  | 1.53 (0.55-4.29)  | 0.02                | 0.17            |       |  |            |            |
| rs7123797  | <i>ANKK1</i> | 11         | Male   | 0.34                   | 385 | 0.98 (0.60-1.60)      | 0.94       | 1.00       | 1.09 (0.36-3.27)             | 0.58 (0.24-1.43) | 1.72 (0.68-4.37)  | 0.87 (0.31-2.46)  | 0.42                | 0.97            |       |  |            |            |
|            |              |            | Female | 0.34                   | 402 | 0.75 (0.45-1.24)      | 0.26       | 0.98       | 0.86 (0.31-2.42)             | 0.27 (0.11-0.65) | 1.85 (0.49-6.92)  | 1.53 (0.55-4.29)  | 0.02                | 0.17            |       |  |            |            |
| rs12360992 | <i>ANKK1</i> | 11         | Male   | 0.46                   | 386 | 0.73 (0.43-1.22)      | 0.23       | 0.97       | 0.70 (0.21-2.31)             | 0.36 (0.14-0.94) | 1.27 (0.45-3.60)  | 0.94 (0.32-2.73)  | 0.32                | 0.92            |       |  |            |            |
|            |              |            | Female | 0.48                   | 402 | 0.81 (0.47-1.40)      | 0.46       | 1.00       | 1.07 (0.32-3.65)             | 0.45 (0.19-1.09) | 1.13 (0.27-4.72)  | 1.26 (0.41-3.89)  | 0.44                | 0.96            |       |  |            |            |
| rs4590907  | <i>ANKK1</i> | 11         | Male   | 0.13                   | 386 | 0.74 (0.42-1.28)      | 0.27       | 0.98       | 0.71 (0.23-2.24)             | 0.57 (0.18-1.86) | 0.92 (0.37-2.30)  | 0.69 (0.18-2.67)  | 0.94                | 1.00            |       |  |            |            |
|            |              |            | Female | 0.15                   | 403 | 1.34 (0.83-2.17)      | 0.24       | 0.97       | 1.91 (0.79-4.59)             | 1.50 (0.65-3.45) | 0.96 (0.27-3.42)  | 0.90 (0.31-2.63)  | 0.68                | 0.98            |       |  |            |            |
| rs17115439 | <i>ANKK1</i> | 11         | Male   | 0.33                   | 386 | 0.98 (0.60-1.59)      | 0.94       | 1.00       | 1.02 (0.34-3.06)             | 0.58 (0.24-1.44) | 1.76 (0.70-4.44)  | 0.87 (0.31-2.46)  | 0.40                | 0.97            |       |  |            |            |
|            |              |            | Female | 0.33                   | 403 | 0.78 (0.47-1.30)      | 0.35       | 0          |                              |                  |                   |                   |                     |                 |       |  |            |            |

| SNP        | Gene Region | Chromosome | Gender | MAF  | N   | Marginal Effect       |            |         | Treatment Stratified Effects |                  |                   |                     |                 |            |
|------------|-------------|------------|--------|------|-----|-----------------------|------------|---------|------------------------------|------------------|-------------------|---------------------|-----------------|------------|
|            |             |            |        |      |     | Likelihood ratio test |            | Placebo | Bupropion                    | Patch            | Spray             | Test of Interaction |                 |            |
|            |             |            |        |      |     | SNP OR (95% CI)       | Observed P |         |                              |                  |                   | Adjusted P          | SNP OR (95% CI) | Observed P |
| rs2471851  | DRD2        | 11         | Male   | 0.16 | 386 | 0.97 (0.61-1.54)      | 0.89       | 1.00    | 0.98 (0.36-2.65)             | 0.73 (0.32-1.66) | 1.41 (0.60-3.31)  | 0.89 (0.29-2.73)    | 0.75            | 1.00       |
|            |             |            | Female | 0.17 | 403 | 0.71 (0.42-1.19)      | 0.18       | 0.93    | 0.29 (0.06-1.33)             | 0.34 (0.13-0.93) | 2.71 (0.83-8.84)  | 1.38 (0.50-3.83)    | 0.02            | 0.13       |
| rs7122246  | DRD2        | 11         | Male   | 0.39 | 385 | 0.74 (0.45-1.22)      | 0.24       | 0.97    | 0.53 (0.17-1.65)             | 0.48 (0.19-1.21) | 1.10 (0.43-2.80)  | 1.02 (0.35-2.94)    | 0.53            | 0.99       |
|            |             |            | Female | 0.41 | 402 | 0.75 (0.45-1.26)      | 0.28       | 0.98    | 0.48 (0.17-1.37)             | 0.49 (0.21-1.16) | 1.86 (0.45-7.65)  | 1.22 (0.43-3.44)    | 0.24            | 0.76       |
| rs4436578  | DRD2        | 11         | Male   | 0.11 | 386 | 0.72 (0.40-1.29)      | 0.25       | 0.98    | 0.44 (0.10-1.97)             | 0.88 (0.28-2.82) | 0.64 (0.23-1.78)  | 1.01 (0.31-3.28)    | 0.82            | 1.00       |
|            |             |            | Female | 0.13 | 403 | 1.61 (1.02-2.55)      | 0.05       | 0.53    | 2.06 (0.92-4.63)             | 1.98 (0.89-4.40) | 0.66 (0.15-2.98)  | 1.36 (0.49-3.79)    | 0.50            | 0.98       |
| rs4587762  | DRD2        | 11         | Male   | 0.40 | 386 | 0.74 (0.45-1.21)      | 0.23       | 0.97    | 0.60 (0.20-1.81)             | 0.48 (0.19-1.21) | 1.03 (0.40-2.62)  | 1.02 (0.35-2.95)    | 0.61            | 1.00       |
|            |             |            | Female | 0.42 | 403 | 0.73 (0.43-1.21)      | 0.23       | 0.96    | 0.48 (0.17-1.37)             | 0.47 (0.20-1.11) | 1.73 (0.42-7.13)  | 1.18 (0.42-3.33)    | 0.26            | 0.79       |
| rs4586205  | DRD2        | 11         | Male   | 0.24 | 385 | 0.93 (0.57-1.52)      | 0.77       | 1.00    | 0.87 (0.28-2.67)             | 1.09 (0.43-2.72) | 0.84 (0.34-2.08)  | 0.92 (0.33-2.16)    | 0.98            | 0.98       |
|            |             |            | Female | 0.25 | 403 | 0.96 (0.58-1.60)      | 0.88       | 1.00    | 1.00 (0.36-2.78)             | 0.97 (0.41-2.27) | 0.98 (0.26-3.70)  | 0.90 (0.32-2.54)    | 1.00            | 1.00       |
| rs4620755  | DRD2        | 11         | Male   | 0.11 | 385 | 0.69 (0.38-1.25)      | 0.21       | 0.95    | 0.44 (0.10-1.94)             | 0.72 (0.20-2.51) | 0.67 (0.24-1.85)  | 1.01 (0.31-3.28)    | 0.85            | 1.00       |
|            |             |            | Female | 0.13 | 403 | 1.45 (0.90-2.34)      | 0.13       | 0.86    | 2.13 (0.95-4.78)             | 1.40 (0.58-3.35) | 0.66 (0.15-2.98)  | 1.36 (0.49-3.78)    | 0.55            | 0.98       |
| rs7125415  | DRD2        | 11         | Male   | 0.09 | 386 | 1.04 (0.55-1.99)      | 0.90       | 1.00    | 0.81 (0.16-4.07)             | 0.92 (0.26-3.31) | 1.11 (0.36-3.43)  | 1.30 (0.37-4.60)    | 0.97            | 1.00       |
|            |             |            | Female | 0.10 | 403 | 1.45 (0.79-2.66)      | 0.24       | 0.97    | 2.49 (0.80-7.72)             | 1.39 (0.48-4.03) | 0.40 (0.05-3.42)  | 1.57 (0.48-5.06)    | 0.44            | 0.96       |
| rs4936270  | DRD2        | 11         | Male   | 0.09 | 384 | 0.85 (0.44-1.66)      | 0.64       | 1.00    | 1.28 (0.31-5.28)             | 0.57 (0.15-2.19) | 1.46 (0.49-4.31)  | 0.28 (0.03-2.30)    | 0.39            | 0.96       |
|            |             |            | Female | 0.11 | 403 | 1.20 (0.65-2.21)      | 0.57       | 1.00    | 1.38 (0.46-4.12)             | 0.62 (0.17-2.33) | 1.04 (0.20-5.43)  | 1.96 (0.64-6.03)    | 0.60            | 0.98       |
| rs4274224  | DRD2        | 11         | Male   | 0.47 | 385 | 1.04 (0.61-1.78)      | 0.89       | 1.00    | 1.23 (0.38-3.98)             | 0.76 (0.30-1.97) | 0.87 (0.30-2.52)  | 1.71 (0.51-5.76)    | 0.73            | 1.00       |
|            |             |            | Female | 0.46 | 403 | 0.84 (0.49-1.45)      | 0.53       | 1.00    | 1.00 (0.32-3.11)             | 0.59 (0.24-1.46) | 1.21 (0.29-5.06)  | 0.93 (0.31-2.74)    | 0.81            | 0.98       |
| rs4245148  | DRD2        | 11         | Male   | 0.09 | 385 | 0.86 (0.44-1.67)      | 0.64       | 1.00    | 1.28 (0.31-5.28)             | 0.57 (0.15-2.19) | 1.46 (0.49-4.31)  | 0.29 (0.03-2.34)    | 0.40            | 0.97       |
|            |             |            | Female | 0.12 | 403 | 1.15 (0.62-2.12)      | 0.66       | 1.00    | 1.21 (0.41-3.59)             | 0.62 (0.17-2.33) | 1.04 (0.20-5.43)  | 1.96 (0.64-6.03)    | 0.62            | 0.98       |
| rs4460839  | DRD2        | 11         | Male   | 0.08 | 385 | 0.89 (0.46-1.75)      | 0.74       | 1.00    | 1.44 (0.34-6.01)             | 0.61 (0.16-2.40) | 1.45 (0.49-4.27)  | 0.29 (0.03-2.35)    | 0.40            | 0.97       |
|            |             |            | Female | 0.11 | 402 | 1.32 (0.71-2.45)      | 0.38       | 0.99    | 1.75 (0.58-5.30)             | 0.68 (0.18-2.57) | 1.04 (0.20-5.43)  | 1.96 (0.64-6.03)    | 0.60            | 0.98       |
| rs7122454  | DRD2        | 11         | Male   | 0.15 | 386 | 1.09 (0.68-1.74)      | 0.73       | 1.00    | 1.18 (0.39-3.55)             | 0.93 (0.40-2.16) | 1.03 (0.45-2.39)  | 1.45 (0.47-4.42)    | 0.94            | 1.00       |
|            |             |            | Female | 0.14 | 403 | 1.02 (0.62-1.67)      | 0.93       | 0.96    | 0.37 (0.10-1.36)             | 1.89 (0.81-4.40) | 1.96 (0.69-5.60)  | 0.61 (0.21-1.74)    | 0.07            | 0.35       |
| rs10891552 | DRD2        | 11         | Male   | 0.05 | NA  | NA                    | NA         | NA      | NA                           | NA               | NA                | NA                  | NA              | NA         |
|            |             |            | Female | 0.03 | NA  | NA                    | NA         | NA      | NA                           | NA               | NA                | NA                  | NA              | NA         |
| rs4630328  | DRD2        | 11         | Male   | 0.38 | 385 | 0.97 (0.68-1.38)      | 0.86       | 1.00    | 0.78 (0.32-1.91)             | 0.90 (0.49-1.67) | 0.65 (0.31-1.36)  | 1.83 (0.88-3.81)    | 0.22            | 0.82       |
|            |             |            | Female | 0.35 | 403 | 0.81 (0.55-1.19)      | 0.27       | 0.98    | 0.76 (0.31-1.85)             | 0.79 (0.43-1.48) | 1.37 (0.59-3.15)  | 0.56 (0.25-1.26)    | 0.51            | 0.98       |
| rs11214613 | DRD2        | 11         | Male   | 0.08 | 385 | 0.81 (0.42-1.58)      | 0.53       | 1.00    | 1.21 (0.33-4.39)             | 0.41 (0.08-1.97) | 1.21 (0.44-3.33)  | 0.34 (0.04-2.84)    | 0.47            | 0.99       |
|            |             |            | Female | 0.10 | 403 | 1.24 (0.71-2.18)      | 0.46       | 1.00    | 1.62 (0.65-3.99)             | 0.54 (0.12-2.44) | 0.91 (0.21-3.92)  | 1.96 (0.64-6.02)    | 0.47            | 0.97       |
| rs4938019  | DRD2        | 11         | Male   | 0.16 | 386 | 1.08 (0.68-1.72)      | 0.75       | 1.00    | 1.12 (0.37-3.36)             | 0.89 (0.38-2.07) | 0.94 (0.41-2.20)  | 1.87 (0.63-5.55)    | 0.74            | 1.00       |
|            |             |            | Female | 0.15 | 402 | 1.00 (0.61-1.64)      | 0.99       | 0.99    | 0.37 (0.10-1.36)             | 1.86 (0.80-4.35) | 1.96 (0.69-5.60)  | 0.58 (0.20-1.66)    | 0.06            | 0.33       |
| rs1799978  | DRD2        | 11         | Male   | 0.06 | 385 | 1.28 (0.61-2.70)      | 0.53       | 1.00    | 2.34 (0.62-8.82)             | 1.27 (0.28-5.65) | 1.54 (0.35-6.81)  | 0.38 (0.05-3.17)    | 0.48            | 0.99       |
|            |             |            | Female | 0.05 | 403 | 1.07 (0.47-2.45)      | 0.87       | 1.00    | 0.98 (0.20-4.95)             | 1.61 (0.45-5.83) | NA                | 0.98 (0.19-5.07)    | 0.60            | 0.98       |
| rs10891556 | DRD2        | 11         | Male   | 0.18 | 378 | 1.10 (0.65-1.84)      | 0.73       | 1.00    | 2.86 (0.94-8.75)             | 0.86 (0.33-2.28) | 0.52 (0.19-1.47)  | 1.53 (0.51-4.55)    | 0.14            | 0.65       |
|            |             |            | Female | 0.17 | 397 | 0.90 (0.52-1.58)      | 0.72       | 1.00    | 0.44 (0.13-1.45)             | 1.48 (0.58-3.81) | 1.60 (0.41-6.15)  | 0.67 (0.22-2.05)    | 0.32            | 0.87       |
| rs6589377  | DRD2        | 11         | Male   | 0.38 | 386 | 0.95 (0.67-1.36)      | 0.78       | 1.00    | 0.75 (0.31-1.81)             | 0.88 (0.47-1.63) | 0.65 (0.31-1.36)  | 1.83 (0.88-3.81)    | 0.21            | 0.81       |
|            |             |            | Female | 0.35 | 403 | 0.81 (0.56-1.19)      | 0.29       | 0.98    | 0.79 (0.32-1.90)             | 0.79 (0.43-1.48) | 1.37 (0.59-3.15)  | 0.56 (0.25-1.26)    | 0.51            | 0.98       |
| rs2110113  | CALM1       | 14         | Male   | 0.12 | 386 | 0.92 (0.53-1.60)      | 0.76       | 0.99    | 0.64 (0.16-2.52)             | 1.36 (0.53-3.46) | 0.62 (0.21-1.80)  | 1.19 (0.34-4.17)    | 0.65            | 0.95       |
|            |             |            | Female | 0.12 | 403 | 0.99 (0.58-1.67)      | 0.96       | 1.00    | 1.35 (0.48-3.79)             | 0.79 (0.30-2.08) | 0.36 (0.05-2.75)  | 1.38 (0.54-3.55)    | 0.51            | 0.84       |
| rs3814847  | CALM1       | 14         | Male   | 0.37 | 386 | 0.98 (0.69-1.38)      | 0.90       | 0.98    | 0.72 (0.33-1.57)             | 1.90 (0.99-3.66) | 0.77 (0.40-1.49)  | 0.74 (0.35-1.59)    | 0.13            | 0.40       |
|            |             |            | Female | 0.34 | 403 | 1.01 (0.70-1.47)      | 0.95       | 1.00    | 2.07 (0.94-4.57)             | 0.83 (0.43-1.60) | 0.99 (0.43-2.30)  | 0.68 (0.31-1.50)    | 0.20            | 0.55       |
| rs12885713 | CALM1       | 14         | Male   | 0.45 | 385 | 0.97 (0.58-1.64)      | 0.92       | 0.92    | 0.96 (0.27-3.41)             | 1.10 (0.41-2.94) | 0.80 (0.32-1.98)  | 1.12 (0.38-3.34)    | 0.96            | 0.96       |
|            |             |            | Female | 0.43 | 401 | 0.98 (0.58-1.66)      | 0.93       | 1.00    | 3.53 (0.76-16.47)            | 0.66 (0.28-1.56) | 0.99 (0.26-3.74)  | 0.75 (0.27-2.07)    | 0.22            | 0.55       |
| rs3213718  | CALM1       | 14         | Male   | 0.43 | 386 | 0.96 (0.57-1.60)      | 0.86       | 0.99    | 0.96 (0.27-3.41)             | 1.51 (0.57-3.97) | 0.64 (0.26-1.58)  | 0.94 (0.32-2.71)    | 0.65            | 0.89       |
|            |             |            | Female | 0.41 | 403 | 0.99 (0.59-1.66)      | 0.96       | 0.96    | 4.12 (0.88-19.16)            | 0.70 (0.30-1.64) | 1.08 (0.29-4.09)  | 0.61 (0.22-1.67)    | 0.12            | 0.37       |
| rs5871     | CALM1       | 14         | Male   | 0.07 | 386 | 1.21 (0.66-2.24)      | 0.55       | 0.97    | 2.13 (0.68-6.69)             | 0.55 (0.15-1.99) | 0.75 (0.19-2.92)  | 2.71 (0.77-9.62)    | 0.20            | 0.53       |
|            |             |            | Female | 0.07 | 402 | 1.09 (0.55-2.16)      | 0.80       | 1.00    | 0.40 (0.05-3.35)             | 1.21 (0.42-3.48) | 0.67 (0.08-5.88)  | 1.83 (0.56-6.01)    | 0.57            | 0.75       |
| rs3814843  | CALM1       | 14         | Male   | 0.04 | NA  | NA                    | NA         | NA      | NA                           | NA               | NA                | NA                  | NA              | NA         |
|            |             |            | Female | 0.04 | NA  | NA                    | NA         | NA      | NA                           | NA               | NA                | NA                  | NA              | NA         |
| rs8006462  | CALM1       | 14         | Male   | 0.34 | 383 | 1.35 (0.83-2.22)      | 0.23       | 0.70    | 1.01 (0.33-3.12)             | 1.15 (0.46-2.86) | 1.71 (0.70-4.19)  | 1.57 (0.54-4.51)    | 0.87            | 0.99       |
|            |             |            | Female | 0.32 | 402 | 1.11 (0.67-1.84)      | 0.68       | 1.00    | 2.73 (0.82-9.30)             | 1.39 (0.59-3.26) | 0.66 (0.18-2.47)  | 0.54 (0.20-1.49)    | 0.15            | 0.46       |
| rs2896135  | CALM1       | 14         | Male   | 0.42 | 386 | 1.04 (0.75-1.46)      | 0.80       | 0.99    | 1.11 (0.53-2.30)             | 1.20 (0.64-2.24) | 0.86 (0.46-1.61)  | 1.06 (0.51-2.23)    | 0.90            | 0.99       |
|            |             |            | Female | 0.38 | 402 | 1.17 (0.82-1.68)      | 0.38       | 0.90    | 1.93 (0.88-4.20)             | 1.21 (0.68-2.16) | 0.78 (0.30-2.01)  | 0.92 (0.44-1.93)    | 0.43            | 0.81       |
| rs876259   | CALM1       | 14         | Male   | 0.07 | 386 | 0.84 (0.44-1.61)      | 0.59       | 0.97    | 1.91 (0.57-6.36)             | 0.76 (0.25-2.31) | 0.28 (0.04-2.20)  | 0.85 (0.19-3.74)    | 0.37            | 0.75       |
|            |             |            | Female | 0.06 | 403 | 0.87 (0.42-1.83)      | 0.72       | 1.00    | 0.39 (0.05-3.25)             | 0.73 (0.21-2.57) | 1.08 (0.12-10.05) | 1.42 (0.44-4.60)    | 0.71            | 0.72       |
| rs12895068 | CALM1       | 14         | Male   | 0.07 | 386 | 0.80 (0.42-1.53)      | 0.49       | 0.95    | 1.60 (0.53-4.86)             | 0.70 (0.23-2.14) | 0.28 (0.04-2.20)  | 0.85 (0.19-3.74)    | 0.43            | 0.82       |
|            |             |            | Female | 0.06 | 402 | 0.89 (0.43-1.88)      | 0.77       | 1.00    | 0.39 (0.05-3.26)             | 0.78 (0.22-2.73) | 1.09 (0.12-10.07) | 1.42 (0.44-4.60)    | 0.72            | 0.72       |
| rs1514246  | CHRNA7      | 15         | Male   | 0.26 | 383 | 1.13 (0.78-1.65)      | 0.51       | 1.00    | 1.13 (0.52-2.43)             | 1.23 (0.62-2.47) | 1.12 (0.56-2.26)  | 1.01 (0.42-2.43)    | 0.99            | 1.00       |
|            |             |            | Female | 0.26 | 400 | 0.75 (0.49-1.15)      | 0.18       | 0.76    | 1.65 (0.79-3.44)             | 0.51 (0.23-1.13) | 0.67 (0.20-2.22)  | 0.45 (0.17-1.16)    | 0.09            | 0.44       |
| rs868437   | CHRNA7      | 15         | Male   | 0.28 | 386 | 1.07 (0.74-1.55)      | 0.73       | 1.00    | 0.92 (0.42-2.02)             | 1.17 (0.59-2.33) | 1.13 (0.56-2.27)  | 1.01 (0.42-2.43)    | 0.97            | 1.00       |
|            |             |            | Female | 0.27 | 402 | 0.65 (0.43-1.00)      | 0.04       | 0.40    | 1.34 (0.64-2.80)             | 0.43 (0.20-0.91) | 0.67 (0.20-2.22)  | 0.48 (0.18-1.22)    | 0.17            | 0.65       |
| rs883473   | CHRNA7      | 15         | Male   | 0.29 | 384 | 1.03 (0.71-1.50)      | 0.87       | 1.00    | 0.86 (0.39-1.91)             | 1.26 (0.64-2.49) | 1.09 (0.54-2.20)  | 0.86 (0.37-2.04)    | 0.87            | 1.00       |
|            |             |            | Female | 0.29 | 402 | 0.65 (0.43-0.99)      | 0          |         |                              |                  |                   |                     |                 |            |

| SNP        | Gene Region   | Chromosome | Gender | MAF  | N   | Marginal Effect       |            |         | Treatment Stratified Effects |                  |                   |                   | Test of Interaction     |                         |            |
|------------|---------------|------------|--------|------|-----|-----------------------|------------|---------|------------------------------|------------------|-------------------|-------------------|-------------------------|-------------------------|------------|
|            |               |            |        |      |     | Likelihood ratio test |            | Placebo | Bupropion                    | Patch            | Spray             | Observed P        | Adjusted P              | Observed P              | Adjusted P |
|            |               |            |        |      |     | SNP OR (95% CI)       | Observed P |         |                              |                  |                   |                   |                         |                         |            |
| rs11852956 | CHRNA7        | 15         | Male   | 0.22 | 385 | 1.09 (0.72-1.66)      | 0.68       | 1.00    | 0.98 (0.41-2.30)             | 0.88 (0.39-1.98) | 1.62 (0.77-3.40)  | 0.89 (0.33-2.44)  | 0.67                    | 1.00                    |            |
|            |               |            | Female | 0.23 | 401 | 0.97 (0.63-1.50)      | 0.89       | 0.89    | 1.19 (0.51-2.75)             | 0.93 (0.44-1.99) | 0.79 (0.22-2.86)  | 0.91 (0.40-2.07)  | 0.95                    | 1.00                    |            |
| rs1039394  | CHRNA7        | 15         | Male   | 0.06 | 384 | 1.66 (0.84-3.31)      | 0.16       | 0.89    | 1.65 (0.38-7.14)             | 1.31 (0.30-5.73) | 1.56 (0.43-5.64)  | 2.19 (0.59-8.17)  | 0.96                    | 1.00                    |            |
|            |               |            | Female | 0.05 | 399 | 1.09 (0.47-2.48)      | 0.85       | 0.98    | 0.49 (0.06-4.15)             | 1.88 (0.51-7.00) | 1.70 (0.31-9.36)  | 0.50 (0.06-4.32)  | 0.55                    | 0.99                    |            |
| rs16956223 | CHRNA7        | 15         | Male   | 0.17 | 386 | 0.68 (0.42-1.11)      | 0.11       | 0.81    | 0.92 (0.31-2.68)             | 0.88 (0.39-2.00) | 0.69 (0.28-1.72)  | 0.28 (0.08-1.06)  | 0.45                    | 0.98                    |            |
|            |               |            | Female | 0.16 | 403 | 0.51 (0.29-0.91)      | 0.02       | 0.22    | 0.54 (0.18-1.67)             | 0.45 (0.16-1.23) | 0.31 (0.04-2.50)  | 0.66 (0.25-1.80)  | 0.90                    | 1.00                    |            |
| rs1392808  | CHRNA7        | 15         | Male   | 0.17 | 382 | 0.70 (0.43-1.14)      | 0.14       | 0.87    | 0.92 (0.31-2.69)             | 0.88 (0.39-2.00) | 0.69 (0.28-1.72)  | 0.32 (0.09-1.20)  | 0.56                    | 0.99                    |            |
|            |               |            | Female | 0.15 | 400 | 0.53 (0.30-0.94)      | 0.02       | 0.27    | 0.56 (0.18-1.71)             | 0.45 (0.16-1.23) | 0.31 (0.04-2.50)  | 0.71 (0.26-1.90)  | 0.87                    | 1.00                    |            |
| rs904952   | CHRNA7        | 15         | Male   | 0.49 | 381 | 1.03 (0.58-1.82)      | 0.93       | 1.00    | 0.45 (0.15-1.39)             | 1.20 (0.38-3.73) | 0.74 (0.25-2.20)  | 3.80 (0.80-18.05) | 0.12                    | 0.64                    |            |
|            |               |            | Female | 0.48 | 400 | 1.56 (0.86-2.83)      | 0.13       | 0.74    | 0.59 (0.20-1.79)             | 2.09 (0.77-5.69) | 3.58 (0.43-30.10) | 1.92 (0.57-6.41)  | 0.27                    | 0.85                    |            |
| rs7402321  | CHRNA7        | 15         | Male   | 0.37 | 372 | 1.66 (0.97-2.81)      | 0.06       | 0.62    | 2.07 (0.60-7.23)             | 2.05 (0.78-5.37) | 2.08 (0.74-5.86)  | 0.78 (0.27-2.28)  | 0.51                    | 0.99                    |            |
|            |               |            | Female | 0.38 | 391 | 0.75 (0.44-1.25)      | 0.27       | 0.89    | 0.72 (0.25-2.11)             | 0.86 (0.35-2.13) | 0.65 (0.18-2.35)  | 0.69 (0.25-1.90)  | 0.98                    | 0.98                    |            |
| rs7175359  | CHRNA7        | 15         | Male   | 0.49 | 384 | 0.97 (0.55-1.71)      | 0.92       | 1.00    | 0.45 (0.15-1.39)             | 1.20 (0.38-3.73) | 0.80 (0.27-2.34)  | 2.33 (0.61-8.91)  | 0.28                    | 0.93                    |            |
|            |               |            | Female | 0.47 | 403 | 1.55 (0.85-2.80)      | 0.14       | 0.76    | 0.59 (0.20-1.79)             | 2.06 (0.76-5.59) | 3.78 (0.45-31.62) | 1.84 (0.55-6.15)  | 0.27                    | 0.84                    |            |
| rs2651418  | CHRNA7        | 15         | Male   | 0.49 | 380 | 1.15 (0.63-2.10)      | 0.65       | 1.00    | 0.55 (0.17-1.73)             | 2.02 (0.53-7.76) | 0.68 (0.23-2.04)  | 3.31 (0.69-15.76) | 0.15                    | 0.74                    |            |
|            |               |            | Female | 0.49 | 400 | 1.56 (0.85-2.87)      | 0.14       | 0.75    | 0.72 (0.23-2.30)             | 1.72 (0.66-4.49) | 3.38 (0.40-28.46) | 2.11 (0.55-8.05)  | 0.49                    | 0.98                    |            |
| rs2611605  | CHRNA7        | 15         | Male   | 0.18 | 384 | 0.99 (0.62-1.57)      | 0.97       | 1.00    | 0.53 (0.15-1.93)             | 1.58 (0.71-3.51) | 1.12 (0.48-2.59)  | 0.63 (0.22-1.84)  | 0.37                    | 0.98                    |            |
|            |               |            | Female | 0.20 | 402 | 0.85 (0.54-1.35)      | 0.49       | 0.96    | 0.89 (0.39-2.06)             | 1.09 (0.50-2.39) | 1.36 (0.44-4.24)  | 0.36 (0.11-1.22)  | 0.33                    | 0.90                    |            |
| rs7178176  | CHRNA7        | 15         | Male   | 0.25 | 385 | 0.85 (0.52-1.39)      | 0.51       | 1.00    | 1.19 (0.39-3.60)             | 1.25 (0.51-3.10) | 0.72 (0.30-1.77)  | 0.46 (0.16-1.38)  | 0.49                    | 0.99                    |            |
|            |               |            | Female | 0.25 | 403 | 1.09 (0.66-1.80)      | 0.75       | 0.98    | 1.22 (0.43-3.43)             | 0.91 (0.39-2.10) | 1.46 (0.40-5.27)  | 1.06 (0.39-2.87)  | 0.93                    | 1.00                    |            |
| rs2337980  | CHRNA7        | 15         | Male   | 0.45 | 384 | 1.39 (0.80-2.43)      | 0.24       | 0.96    | 6.66 (0.83-53.67)            | 1.15 (0.43-3.06) | 1.29 (0.45-3.68)  | 0.87 (0.29-2.61)  | 0.26                    | 0.91                    |            |
|            |               |            | Female | 0.43 | 402 | 1.23 (0.71-2.13)      | 0.47       | 0.98    | 0.75 (0.26-2.11)             | 1.01 (0.40-2.59) | NA                | 1.14 (0.39-4.30)  | 0.05                    | 0.26                    |            |
| rs7164518  | CHRNA7        | 15         | Male   | 0.18 | 381 | 0.67 (0.42-1.09)      | 0.10       | 0.77    | 0.85 (0.26-2.79)             | 1.33 (0.61-2.91) | 0.49 (0.18-1.35)  | 0.25 (0.07-0.88)  | 0.10                    | 0.59                    |            |
|            |               |            | Female | 0.17 | 398 | 0.88 (0.54-1.44)      | 0.62       | 0.98    | 0.82 (0.29-2.29)             | 0.70 (0.29-1.66) | 0.69 (0.14-3.27)  | 1.28 (0.56-2.91)  | 0.76                    | 1.00                    |            |
| rs4275821  | CHRNA5        | 15         | Male   | 0.35 | 386 | 0.82 (0.50-1.34)      | 0.43       | 0.97    | 1.51 (0.50-4.63)             | 0.90 (0.36-2.29) | 0.50 (0.20-1.22)  | 0.81 (0.29-2.29)  | 0.49                    | 0.64                    |            |
|            |               |            | Female | 0.38 | 403 | 0.72 (0.43-1.19)      | 0.20       | 0.65    | 2.20 (0.67-7.28)             | 0.35 (0.15-0.83) | 0.45 (0.12-1.65)  | 0.98 (0.36-2.67)  | 0.06                    | 0.24                    |            |
| rs2036527  | CHRNA5        | 15         | Male   | 0.41 | 386 | 1.05 (0.74-1.49)      | 0.80       | 1.00    | 0.49 (0.20-1.18)             | 1.29 (0.71-2.36) | 0.71 (0.35-1.46)  | 2.18 (1.00-4.71)  | 0.04                    | 0.15                    |            |
|            |               |            | Female | 0.40 | 402 | 1.34 (0.94-1.91)      | 0.10       | 0.57    | 0.82 (0.39-1.73)             | 1.93 (1.02-3.64) | 1.93 (0.85-4.38)  | 1.00 (0.49-2.03)  | 0.21                    | 0.62                    |            |
| rs684513   | CHRNA5        | 15         | Male   | 0.17 | 384 | 0.94 (0.55-1.60)      | 0.82       | 1.00    | 1.56 (0.51-4.74)             | 0.57 (0.19-1.74) | 4.00 (1.53-10.42) | 0.11 (0.02-0.50)  | 7.74 × 10 <sup>-5</sup> | 6.98 × 10 <sup>-4</sup> |            |
|            |               |            | Female | 0.15 | 402 | 1.58 (0.92-2.72)      | 0.10       | 0.57    | 1.56 (0.51-4.72)             | 1.84 (0.71-4.73) | 1.19 (0.31-4.50)  | 1.59 (0.55-5.59)  | 0.96                    | 0.96                    |            |
| rs871058   | CHRNA5        | 15         | Male   | 0.33 | 386 | 0.84 (0.51-1.36)      | 0.47       | 0.98    | 1.31 (0.44-3.95)             | 0.90 (0.36-2.29) | 0.56 (0.23-1.37)  | 0.86 (0.30-2.42)  | 0.69                    | 0.79                    |            |
|            |               |            | Female | 0.37 | 403 | 0.66 (0.40-1.08)      | 0.10       | 0.57    | 2.59 (0.78-8.55)             | 0.30 (0.13-0.73) | 0.48 (0.13-1.77)  | 0.69 (0.26-1.87)  | 0.03                    | 0.12                    |            |
| rs667282   | CHRNA5        | 15         | Male   | 0.20 | 386 | 1.03 (0.66-1.61)      | 0.89       | 0.95    | 1.85 (0.69-4.92)             | 0.67 (0.24-1.86) | 2.32 (1.11-4.86)  | 1.17 (0.04-6.61)  | 7.10 × 10 <sup>-3</sup> | 5.30 × 10 <sup>-3</sup> |            |
|            |               |            | Female | 0.16 | 403 | 1.11 (0.70-1.75)      | 0.67       | 0.98    | 1.54 (0.60-3.98)             | 1.33 (0.58-3.06) | 1.17 (0.31-4.43)  | 0.73 (0.32-1.71)  | 0.65                    | 0.98                    |            |
| rs601079   | CHRNA5        | 15         | Male   | 0.39 | 386 | 0.83 (0.50-1.37)      | 0.47       | 0.98    | 1.00 (0.33-3.00)             | 1.19 (0.45-3.13) | 0.41 (0.16-1.03)  | 1.12 (0.39-3.23)  | 0.36                    | 0.51                    |            |
|            |               |            | Female | 0.44 | 403 | 0.59 (0.35-1.00)      | 0.05       | 0.36    | 1.55 (0.46-5.19)             | 0.21 (0.09-0.53) | 0.47 (0.13-1.74)  | 1.15 (0.41-3.25)  | 0.02                    | 0.11                    |            |
| rs637137   | CHRNA5        | 15         | Male   | 0.20 | 386 | 1.04 (0.67-1.63)      | 0.86       | 0.99    | 1.85 (0.70-4.93)             | 0.67 (0.24-1.86) | 2.38 (1.14-4.97)  | 1.17 (0.04-6.61)  | 6.30 × 10 <sup>-4</sup> | 4.81 × 10 <sup>-3</sup> |            |
|            |               |            | Female | 0.16 | 403 | 1.11 (0.70-1.75)      | 0.67       | 0.98    | 1.54 (0.60-3.98)             | 1.33 (0.58-3.06) | 1.17 (0.31-4.43)  | 0.73 (0.32-1.71)  | 0.65                    | 0.98                    |            |
| rs692780   | CHRNA5        | 15         | Male   | 0.35 | 386 | 0.77 (0.47-1.26)      | 0.30       | 0.89    | 1.09 (0.37-3.22)             | 1.13 (0.44-2.91) | 0.44 (0.18-1.09)  | 0.73 (0.26-2.06)  | 0.48                    | 0.63                    |            |
|            |               |            | Female | 0.38 | 403 | 0.82 (0.49-1.36)      | 0.44       | 0.92    | 2.17 (0.66-7.18)             | 0.33 (0.14-0.78) | 0.70 (0.19-2.54)  | 1.38 (0.50-3.80)  | 0.04                    | 0.17                    |            |
| rs555018   | CHRNA3;CHRNA5 | 15         | Male   | 0.39 | 386 | 0.76 (0.46-1.24)      | 0.27       | 0.86    | 0.82 (0.28-2.44)             | 1.01 (0.39-2.61) | 0.39 (0.16-0.99)  | 1.12 (0.39-3.23)  | 0.42                    | 0.57                    |            |
|            |               |            | Female | 0.44 | 403 | 0.59 (0.35-1.00)      | 0.05       | 0.36    | 1.55 (0.46-5.19)             | 0.21 (0.09-0.53) | 0.47 (0.13-1.74)  | 1.15 (0.41-3.25)  | 0.02                    | 0.11                    |            |
| rs647041   | CHRNA3;CHRNA5 | 15         | Male   | 0.39 | 385 | 0.71 (0.43-1.16)      | 0.17       | 0.71    | 0.60 (0.20-1.79)             | 1.09 (0.42-2.82) | 0.39 (0.15-0.98)  | 1.03 (0.35-3.02)  | 0.39                    | 0.54                    |            |
|            |               |            | Female | 0.44 | 403 | 0.58 (0.35-0.98)      | 0.04       | 0.32    | 1.55 (0.46-5.19)             | 0.21 (0.09-0.53) | 0.47 (0.13-1.74)  | 1.09 (0.39-3.07)  | 0.03                    | 0.12                    |            |
| rs514743   | CHRNA3;CHRNA5 | 15         | Male   | 0.35 | 386 | 0.77 (0.47-1.25)      | 0.28       | 0.88    | 1.01 (0.34-2.99)             | 1.22 (0.48-3.15) | 0.42 (0.17-1.04)  | 0.73 (0.26-2.07)  | 0.40                    | 0.55                    |            |
|            |               |            | Female | 0.39 | 403 | 0.90 (0.54-1.50)      | 0.69       | 0.98    | 2.17 (0.66-7.17)             | 0.33 (0.14-0.78) | 0.69 (0.19-2.53)  | 2.05 (0.71-5.95)  | 0.02                    | 0.09                    |            |
| rs578776   | CHRNA3;CHRNA5 | 15         | Male   | 0.24 | 386 | 1.28 (0.84-1.94)      | 0.25       | 0.84    | 1.94 (0.77-4.90)             | 0.78 (0.31-1.95) | 2.57 (1.27-5.19)  | 0.40 (0.14-1.13)  | 0.01                    | 0.05                    |            |
|            |               |            | Female | 0.21 | 403 | 0.73 (0.46-1.17)      | 0.18       | 0.69    | 0.78 (0.31-2.00)             | 0.94 (0.41-2.17) | 0.72 (0.21-2.39)  | 0.55 (0.23-1.33)  | 0.85                    | 0.94                    |            |
| rs6495307  | CHRNA3;CHRNA5 | 15         | Male   | 0.39 | 386 | 0.73 (0.44-1.20)      | 0.22       | 0.80    | 0.68 (0.23-2.04)             | 1.04 (0.40-2.69) | 0.39 (0.15-0.97)  | 1.12 (0.39-3.24)  | 0.39                    | 0.54                    |            |
|            |               |            | Female | 0.44 | 403 | 0.58 (0.35-0.98)      | 0.04       | 0.32    | 1.55 (0.46-5.19)             | 0.21 (0.09-0.53) | 0.47 (0.13-1.74)  | 1.09 (0.39-3.07)  | 0.03                    | 0.12                    |            |
| rs1051730  | CHRNA3;CHRNA5 | 15         | Male   | 0.40 | 381 | 1.04 (0.74-1.48)      | 0.81       | 1.00    | 0.49 (0.21-1.14)             | 1.04 (0.56-1.94) | 0.98 (0.49-1.96)  | 2.24 (1.04-4.85)  | 0.06                    | 0.21                    |            |
|            |               |            | Female | 0.39 | 400 | 1.31 (0.92-1.86)      | 0.13       | 0.62    | 0.87 (0.42-1.84)             | 1.68 (0.90-3.15) | 1.92 (0.87-4.24)  | 1.01 (0.50-2.07)  | 0.37                    | 0.83                    |            |
| rs3743078  | CHRNA3;CHRNA5 | 15         | Male   | 0.21 | 386 | 1.06 (0.69-1.64)      | 0.79       | 1.00    | 1.97 (0.81-4.81)             | 0.71 (0.27-1.87) | 2.24 (1.07-4.67)  | 1.17 (0.04-6.61)  | 6.79 × 10 <sup>-4</sup> | 5.13 × 10 <sup>-3</sup> |            |
|            |               |            | Female | 0.16 | 403 | 1.04 (0.65-1.67)      | 0.86       | 1.00    | 1.13 (0.42-3.03)             | 1.33 (0.58-3.06) | 1.17 (0.31-4.43)  | 0.75 (0.32-1.78)  | 0.81                    | 0.96                    |            |
| rs3743077  | CHRNA3;CHRNA5 | 15         | Male   | 0.36 | 361 | 0.67 (0.40-1.13)      | 0.13       | 0.61    | 0.66 (0.20-2.10)             | 1.01 (0.38-2.68) | 0.38 (0.15-0.97)  | 0.88 (0.29-2.70)  | 0.51                    | 0.67                    |            |
|            |               |            | Female | 0.42 | 384 | 0.56 (0.33-0.94)      | 0.03       | 0.24    | 1.49 (0.44-5.05)             | 0.21 (0.08-0.53) | 0.34 (0.09-1.28)  | 1.13 (0.40-3.22)  | 0.02                    | 0.11                    |            |
| rs1317286  | CHRNA3;CHRNA5 | 15         | Male   | 0.41 | 384 | 1.10 (0.78-1.56)      | 0.59       | 0.99    | 0.62 (0.28-1.39)             | 1.10 (0.60-2.04) | 0.93 (0.46-1.89)  | 2.27 (1.04-4.97)  | 0.13                    | 0.32                    |            |
|            |               |            | Female | 0.40 | 401 | 1.36 (0.96-1.94)      | 0.09       | 0.52    | 0.79 (0.37-1.70)             | 1.96 (1.04-3.68) | 1.89 (0.85-4.20)  | 1.04 (0.50-2.14)  | 0.21                    | 0.63                    |            |
| rs938682   | CHRNA3        | 15         | Male   | 0.20 | 386 | 1.03 (0.66-1.61)      | 0.90       | 0.90    | 2.10 (0.79-5.57)             | 0.62 (0.23-1.72) | 2.24 (1.07-4.67)  | 1.17 (0.04-6.61)  | 5.43 × 10 <sup>-4</sup> | 4.20 × 10 <sup>-3</sup> |            |
|            |               |            | Female | 0.16 | 403 | 1.06 (0.66-1.69)      | 0.81       | 0.99    | 1.26 (0.47-3.36)             | 1.33 (0.58-3.06) | 1.08 (0.31-3.79)  | 0.75 (0.32-1.78)  | 0.79                    | 0.95                    |            |
| rs4887069  | CHRNA3;CHRNA5 | 15         | Male   | 0.20 | 383 | 1.07 (0.69-1.66)      | 0.78       | 1.00    | 1.83 (0.72-4.61)             | 0.62 (0.22-1.72) | 2.63 (1.24-5.55)  | 1.                |                         |                         |            |

| SNP        | Gene Region | Chromosome | Gender | MAF                   | N   | Marginal Effect       |                       |            | Treatment Stratified Effects |                  |                    |                  | Test of Interaction |                 |            |            |            |            |
|------------|-------------|------------|--------|-----------------------|-----|-----------------------|-----------------------|------------|------------------------------|------------------|--------------------|------------------|---------------------|-----------------|------------|------------|------------|------------|
|            |             |            |        |                       |     | Likelihood ratio test |                       |            | SNP OR (95% CI)              | SNP OR (95% CI)  | SNP OR (95% CI)    | SNP OR (95% CI)  | SNP OR (95% CI)     | SNP OR (95% CI) | Observed P | Adjusted P | Observed P | Adjusted P |
|            |             |            |        |                       |     | SNP OR (95% CI)       | Observed P            | Adjusted P |                              |                  |                    |                  |                     |                 |            |            |            |            |
| rs12051375 | CREBBP      | 16         | Female | 0.02                  | NA  | NA                    | NA                    | NA         | NA                           | NA               | NA                 | NA               | NA                  | NA              | NA         | NA         | NA         |            |
|            |             |            | Male   | $5.08 \times 10^{-3}$ | NA  | NA                    | NA                    | NA         | NA                           | NA               | NA                 | NA               | NA                  | NA              | NA         | NA         | NA         | NA         |
| rs130002   | CREBBP      | 16         | Female | $8.66 \times 10^{-3}$ | NA  | NA                    | NA                    | NA         | NA                           | NA               | NA                 | NA               | NA                  | NA              | NA         | NA         | NA         | NA         |
|            |             |            | Male   | $5.08 \times 10^{-3}$ | NA  | NA                    | NA                    | NA         | NA                           | NA               | NA                 | NA               | NA                  | NA              | NA         | NA         | NA         | NA         |
| rs8052927  | CREBBP      | 16         | Female | $8.66 \times 10^{-3}$ | NA  | NA                    | NA                    | NA         | NA                           | NA               | NA                 | NA               | NA                  | NA              | NA         | NA         | NA         | NA         |
|            |             |            | Male   | 0.02                  | NA  | NA                    | NA                    | NA         | NA                           | NA               | NA                 | NA               | NA                  | NA              | NA         | NA         | NA         | NA         |
| rs130021   | CREBBP      | 16         | Female | 0.02                  | NA  | NA                    | NA                    | NA         | NA                           | NA               | NA                 | NA               | NA                  | NA              | NA         | NA         | NA         | NA         |
|            |             |            | Male   | 0.35                  | 386 | 0.71 (0.44-1.16)      | 0.18                  | 0.72       | 0.61 (0.20-1.84)             | 1.12 (0.45-2.79) | 0.59 (0.24-1.46)   | 0.58 (0.20-1.63) | 0.71                | 0.84            |            |            |            |            |
| rs130025   | CREBBP      | 16         | Female | 0.37                  | 403 | 0.78 (0.47-1.29)      | 0.33                  | 0.91       | 0.63 (0.23-1.76)             | 1.26 (0.53-3.04) | 0.50 (0.14-1.80)   | 0.65 (0.24-1.78) | 0.58                | 0.90            |            |            |            |            |
|            |             |            | Male   | 0.02                  | NA  | NA                    | NA                    | NA         | NA                           | NA               | NA                 | NA               | NA                  | NA              | NA         | NA         | NA         |            |
| rs8046065  | CREBBP      | 16         | Female | 0.01                  | NA  | NA                    | NA                    | NA         | NA                           | NA               | NA                 | NA               | NA                  | NA              | NA         | NA         | NA         | NA         |
|            |             |            | Male   | 0.12                  | 386 | 1.55 (0.90-2.67)      | 0.12                  | 0.61       | 1.03 (0.25-4.15)             | 0.91 (0.31-2.66) | 2.72 (1.07-6.90)   | 1.72 (0.52-5.65) | 0.43                | 0.83            |            |            |            |            |
| rs3789033  | CREBBP      | 16         | Female | 0.12                  | 403 | 1.29 (0.73-2.29)      | 0.38                  | 0.92       | 0.51 (0.14-1.93)             | 0.90 (0.32-2.53) | 3.75 (0.98-14.29)  | 2.25 (0.75-6.72) | 0.11                | 0.41            |            |            |            |            |
|            |             |            | Male   | 0.22                  | 386 | 0.91 (0.55-1.50)      | 0.71                  | 0.99       | 1.07 (0.35-3.20)             | 1.23 (0.49-3.08) | 0.51 (0.19-1.36)   | 1.08 (0.38-3.08) | 0.57                | 0.76            |            |            |            |            |
| rs8047652  | CREBBP      | 16         | Female | 0.24                  | 403 | 0.68 (0.40-1.14)      | 0.14                  | 0.62       | 0.71 (0.25-2.00)             | 0.71 (0.30-1.70) | 0.26 (0.05-1.28)   | 0.99 (0.36-2.70) | 0.54                | 0.88            |            |            |            |            |
|            |             |            | Male   | 0.02                  | NA  | NA                    | NA                    | NA         | NA                           | NA               | NA                 | NA               | NA                  | NA              | NA         | NA         | NA         |            |
| rs13334803 | CREBBP      | 16         | Female | 0.02                  | NA  | NA                    | NA                    | NA         | NA                           | NA               | NA                 | NA               | NA                  | NA              | NA         | NA         | NA         | NA         |
|            |             |            | Male   | 0.02                  | NA  | NA                    | NA                    | NA         | NA                           | NA               | NA                 | NA               | NA                  | NA              | NA         | NA         | NA         | NA         |
| rs130046   | CREBBP      | 16         | Female | 0.01                  | NA  | NA                    | NA                    | NA         | NA                           | NA               | NA                 | NA               | NA                  | NA              | NA         | NA         | NA         | NA         |
|            |             |            | Male   | 0.02                  | NA  | NA                    | NA                    | NA         | NA                           | NA               | NA                 | NA               | NA                  | NA              | NA         | NA         | NA         | NA         |
| rs11644593 | CREBBP      | 16         | Female | 0.01                  | NA  | NA                    | NA                    | NA         | NA                           | NA               | NA                 | NA               | NA                  | NA              | NA         | NA         | NA         | NA         |
|            |             |            | Male   | 0.10                  | 386 | 0.42 (0.20-0.87)      | 0.01                  | 0.10       | 0.58 (0.12-2.83)             | 0.62 (0.19-2.09) | 0.26 (0.06-1.20)   | 0.26 (0.03-2.03) | 0.76                | 0.76            |            |            |            |            |
| rs1296720  | CREBBP      | 16         | Female | 0.11                  | 403 | 1.19 (0.68-2.06)      | 0.55                  | 0.96       | 0.71 (0.16-3.18)             | 1.56 (0.67-3.61) | 1.09 (0.28-4.20)   | 1.09 (0.34-3.53) | 0.82                | 0.82            |            |            |            |            |
|            |             |            | Male   | 0.20                  | 386 | 1.00 (0.61-1.65)      | 0.99                  | 0.99       | 2.10 (0.69-6.38)             | 0.66 (0.24-1.80) | 0.89 (0.36-2.19)   | 0.99 (0.34-2.85) | 0.49                | 0.86            |            |            |            |            |
| rs4567717  | CREBBP      | 16         | Female | 0.18                  | 402 | 1.71 (1.02-2.87)      | 0.04                  | 0.29       | 2.92 (1.03-8.28)             | 3.14 (1.32-7.49) | 0.39 (0.08-1.96)   | 0.88 (0.28-2.73) | 0.04                | 0.18            |            |            |            |            |
|            |             |            | Male   | 0.02                  | NA  | NA                    | NA                    | NA         | NA                           | NA               | NA                 | NA               | NA                  | NA              | NA         | NA         | NA         |            |
| rs2540038  | CREBBP      | 16         | Female | 0.01                  | NA  | NA                    | NA                    | NA         | NA                           | NA               | NA                 | NA               | NA                  | NA              | NA         | NA         | NA         | NA         |
|            |             |            | Male   | 0.01                  | NA  | NA                    | NA                    | NA         | NA                           | NA               | NA                 | NA               | NA                  | NA              | NA         | NA         | NA         | NA         |
| rs2239316  | CREBBP      | 16         | Female | $9.93 \times 10^{-3}$ | NA  | NA                    | NA                    | NA         | NA                           | NA               | NA                 | NA               | NA                  | NA              | NA         | NA         | NA         | NA         |
|            |             |            | Male   | 0.26                  | 386 | 0.88 (0.54-1.44)      | 0.61                  | 0.98       | 1.35 (0.45-4.06)             | 0.77 (0.31-1.92) | 0.61 (0.24-1.54)   | 1.15 (0.41-3.24) | 0.68                | 0.84            |            |            |            |            |
| rs7202140  | CREBBP      | 16         | Female | 0.27                  | 403 | 0.58 (0.34-0.98)      | 0.04                  | 0.28       | 0.92 (0.33-2.55)             | 0.55 (0.23-1.32) | 0.20 (0.04-1.02)   | 0.68 (0.24-1.91) | 0.43                | 0.84            |            |            |            |            |
|            |             |            | Male   | 0.02                  | NA  | NA                    | NA                    | NA         | NA                           | NA               | NA                 | NA               | NA                  | NA              | NA         | NA         | NA         | NA         |
| rs2526687  | CREBBP      | 16         | Female | 0.02                  | NA  | NA                    | NA                    | NA         | NA                           | NA               | NA                 | NA               | NA                  | NA              | NA         | NA         | NA         | NA         |
|            |             |            | Male   | 0.01                  | NA  | NA                    | NA                    | NA         | NA                           | NA               | NA                 | NA               | NA                  | NA              | NA         | NA         | NA         | NA         |
| rs12453682 | PPP1R1B     | 17         | Female | $9.90 \times 10^{-3}$ | NA  | NA                    | NA                    | NA         | NA                           | NA               | NA                 | NA               | NA                  | NA              | NA         | NA         | NA         | NA         |
|            |             |            | Male   | 0.31                  | 386 | 0.96 (0.59-1.57)      | 0.88                  | 0.88       | 0.62 (0.21-1.87)             | 0.64 (0.26-1.58) | 1.04 (0.43-2.54)   | 2.32 (0.75-7.20) | 0.27                | 0.40            |            |            |            |            |
| rs1877032  | PPP1R1B     | 17         | Female | 0.33                  | 403 | 0.81 (0.48-1.34)      | 0.40                  | 0.79       | 1.34 (0.48-3.74)             | 0.53 (0.22-1.25) | 0.83 (0.23-3.02)   | 0.84 (0.31-2.28) | 0.59                | 0.84            |            |            |            |            |
|            |             |            | Male   | 0.10                  | 345 | 0.42 (0.19-0.94)      | 0.02                  | 0.11       | 0.29 (0.03-2.51)             | 0.31 (0.06-1.50) | 0.55 (0.14-2.12)   | 0.56 (0.11-2.77) | 0.91                | 0.91            |            |            |            |            |
| rs1874228  | PPP1R1B     | 17         | Female | 0.08                  | 366 | 0.41 (0.17-1.01)      | 0.03                  | 0.14       | 0.82 (0.16-4.13)             | 0.14 (0.02-1.13) | 0.69 (0.08-6.15)   | 0.48 (0.10-2.37) | 0.53                | 0.83            |            |            |            |            |
|            |             |            | Male   | 0.25                  | 381 | 0.94 (0.57-1.54)      | 0.80                  | 0.93       | 0.55 (0.17-1.79)             | 0.66 (0.26-1.64) | 0.98 (0.39-2.46)   | 2.22 (0.75-6.59) | 0.27                | 0.41            |            |            |            |            |
| rs879606   | PPP1R1B     | 17         | Female | 0.29                  | 399 | 0.88 (0.53-1.46)      | 0.62                  | 0.78       | 1.37 (0.49-3.81)             | 0.65 (0.28-1.52) | 0.92 (0.25-3.35)   | 0.85 (0.31-2.30) | 0.75                | 0.79            |            |            |            |            |
|            |             |            | Male   | 0.16                  | 386 | 1.60 (1.04-2.46)      | 0.03                  | 0.13       | 0.78 (0.25-2.45)             | 1.24 (0.58-2.64) | 2.09 (0.92-4.76)   | 2.97 (1.15-7.68) | 0.24                | 0.48            |            |            |            |            |
| rs1495099  | PPP1R1B     | 17         | Female | 0.20                  | 402 | 1.31 (0.85-2.01)      | 0.22                  | 0.56       | 1.65 (0.75-3.63)             | 1.32 (0.65-2.69) | 1.67 (0.55-5.10)   | 0.82 (0.32-2.09) | 0.67                | 0.88            |            |            |            |            |
|            |             |            | Male   | 0.29                  | 381 | 0.86 (0.53-1.41)      | 0.55                  | 0.87       | 0.61 (0.20-1.84)             | 0.68 (0.28-1.68) | 0.90 (0.36-2.25)   | 1.56 (0.52-4.68) | 0.61                | 0.80            |            |            |            |            |
| rs907094   | PPP1R1B     | 17         | Female | 0.31                  | 397 | 0.93 (0.56-1.56)      | 0.79                  | 0.79       | 1.50 (0.54-4.19)             | 0.53 (0.22-1.28) | 1.05 (0.29-3.79)   | 1.15 (0.42-3.16) | 0.46                | 0.76            |            |            |            |            |
|            |             |            | Male   | 0.23                  | 386 | 1.15 (0.70-1.89)      | 0.57                  | 0.87       | 0.45 (0.14-1.45)             | 0.86 (0.34-2.16) | 1.30 (0.52-3.27)   | 3.33 (1.12-9.90) | 0.07                | 0.20            |            |            |            |            |
| rs1874224  | PPP1R1B     | 17         | Female | 0.26                  | 403 | 1.18 (0.71-1.96)      | 0.52                  | 0.88       | 1.56 (0.56-4.34)             | 0.83 (0.36-1.95) | 1.40 (0.39-5.06)   | 1.33 (0.49-3.62) | 0.79                | 0.79            |            |            |            |            |
|            |             |            | Male   | 0.02                  | NA  | NA                    | NA                    | NA         | NA                           | NA               | NA                 | NA               | NA                  | NA              | NA         | NA         | NA         |            |
| rs9892427  | PPP1R1B     | 17         | Female | $8.66 \times 10^{-3}$ | NA  | NA                    | NA                    | NA         | NA                           | NA               | NA                 | NA               | NA                  | NA              | NA         | NA         | NA         | NA         |
|            |             |            | Male   | 0.07                  | 386 | 0.45 (0.19-1.04)      | 0.04                  | 0.14       | NA                           | 0.28 (0.06-1.34) | 0.55 (0.11-2.73)   | 1.51 (0.36-6.24) | 0.13                | 0.32            |            |            |            |            |
| rs9972882  | PPP1R1B     | 17         | Female | 0.06                  | 403 | 0.79 (0.35-1.78)      | 0.56                  | 0.87       | 0.95 (0.24-3.72)             | 0.45 (0.10-2.15) | NA                 | 2.10 (0.47-9.37) | 0.28                | 0.58            |            |            |            |            |
|            |             |            | Male   | 0.25                  | 386 | 1.11 (0.68-1.80)      | 0.68                  | 0.90       | 0.91 (0.29-2.78)             | 0.82 (0.33-2.03) | 1.35 (0.55-3.31)   | 1.52 (0.53-4.37) | 0.78                | 0.91            |            |            |            |            |
| rs12953076 | CRHRI       | 17         | Female | 0.29                  | 403 | 0.91 (0.55-1.51)      | 0.72                  | 0.81       | 1.62 (0.58-4.51)             | 0.64 (0.27-1.51) | 0.97 (0.27-3.52)   | 0.80 (0.30-2.18) | 0.59                | 0.84            |            |            |            |            |
|            |             |            | Male   | 0.19                  | 385 | 1.09 (0.65-1.82)      | 0.75                  | 0.97       | 1.26 (0.41-3.91)             | 0.83 (0.31-2.21) | 0.85 (0.32-2.21)   | 1.90 (0.64-5.63) | 0.65                | 0.86            |            |            |            |            |
| rs4074461  | CRHRI       | 17         | Female | 0.16                  | 403 | 2.03 (1.20-3.42)      | $8.83 \times 10^{-3}$ | 0.08       | 1.38 (0.46-4.12)             | 1.40 (0.58-3.37) | 5.13 (1.35-19.46)  | 2.80 (0.99-7.89) | 0.33                | 0.54            |            |            |            |            |
|            |             |            | Male   | 0.43                  | 386 | 0.79 (0.56-1.12)      | 0.18                  | 0.68       | 0.75 (0.34-1.68)             | 0.57 (0.29-1.10) | 1.11 (0.61-2.05)   | 0.78 (0.37-1.64) | 0.53                | 0.90            |            |            |            |            |
| rs12944712 | CRHRI       | 17         | Female | 0.49                  | 400 | 0.96 (0.67-1.38)      | 0.83                  | 0.97       | 1.57 (0.73-3.36)             | 1.03 (0.57-1.86) | 0.49 (0.18-1.33)   | 0.81 (0.39-1.69) | 0.29                | 0.55            |            |            |            |            |
|            |             |            | Male   | 0.45                  | 386 | 1.20 (0.70-2.05)      | 0.51                  | 0.91       | 1.94 (0.50-7.53)             | 2.40 (0.80-7.21) | 0.83 (0.33-2.09)   | 0.60 (0.19-1.84) | 0.24                | 0.71            |            |            |            |            |
| rs4792887  | CRHRI       | 17         | Female | 0.41                  | 403 | 0.86 (0.51-1.45)      | 0.58                  | 0.93       | 0.39 (0.14-1.10)             | 1.24 (0.53-2.90) | 0.84 (0.20-3.58)   | 1.14 (0.39-3.37) | 0.36                | 0.52            |            |            |            |            |
|            |             |            | Male   | 0.12                  | 386 | 1.06 (0.59-1.92)      | 0.83                  | 0.83       | 0.83 (0.21-3.31)             | 0.95 (0.30-2.99) | 0.71 (0.24-2.15)   | 2.47 (0.78-7.82) | 0.45                | 0.87            |            |            |            |            |
| rs16940646 | CRHRI       | 17         | Female | 0.11                  | 403 | 1.95 (1.09-3.50)      | 0.03                  | 0.19       | 1.06 (0.27-4.17)             | 1.35 (0.55-3.31) | 10.04 (2.31-43.68) | 2.36 (0.70-8.01) | 0.10                | 0.30            |            |            |            |            |
|            |             |            | Male   | 0.12                  | 385 | 1.19 (0.66-2.12)      | 0.57                  | 0.87       | 1.46 (0.40-5.26)             | 0.95 (0.30-3.00) | 0.71 (0.24-2.15)   | 2.47 (0.78-7.83) | 0.46                | 0.87            |            |            |            |            |
| rs242924   | CRHRI       | 17         | Female | 0.11                  | 403 | 2.00 (1.11-3.58)      | 0.02                  | 0.16       | 1.06 (0.27-4.16)             | 1.42 (0.58-3.48) | 10.04 (2.31-43.66) | 2.36 (0.70-8.01) | 0.11                | 0.32            |            |            |            |            |
|            |             |            | Male   | 0.42                  | 385 | 0.56 (0.34-0.92)      | 0.02                  | 0.18       | 0.42 (0.14-1.26)             | 0.35 (0.14-0.88) | 0.71 (0.27-1.84)   | 1.03 (0.35-3.10) | 0.43                | 0.86            |            |            |            |            |
| rs242942   | CRHRI       | 17         | Female | 0.47                  | 403 | 0.77 (0.44-1.33)      | 0.35                  | 0.89       | 0.76 (0.25-2.25)             | 2.53 (0.80-7.99) | 0.21 (0.06-0.81)   | 0.48 (0.16-1.42) | 0.03                | 0.11            |            |            |            |            |
|            |             |            | Male   | 0.13                  | 386 | 1.65 (1.02-2.66)      | 0.04                  | 0.28       | 1.90 (0.62-5.85)             | 1.39 (0.52-3.75) | 1.59 (0.74-3.41)   | 1.91 (0.68-5.35) | 0.97                | 0.97            |            |            |            |            |
| rs81189    | CRHRI       | 17         | Female | 0.12                  | 403 | 1.05 (0.60-1.83)      | 0.86                  | 0.86       | 0.69 (0.19-2.48)             | 0.53 (0.21-1.32) | 5.78 (1.30-25.77)  | 2.08 (0.72-5.99) | 0.03                | 0.12            |            |            |            |            |
|            |             |            | Male   | 0.46                  | 385 | 0.69 (0.41-1.16)      | 0.16                  | 0.67       | 0.55 (0.18-1.68)             | 0.51 (0.20-1.30) | 0.62 (0.23-1.69)   | 1.55 (0.46-5.24) | 0.48                | 0.88            |            |            |            |            |
| rs242939   | CRHRI       | 17         | Female | 0.50                  | 403 | 0.87 (0.48-1.56)      | 0.65                  | 0.98       | 0.64 (0.21-1.91)             |                  |                    |                  |                     |                 |            |            |            |            |

| SNP        | Gene Region | Chromosome | Gender | MAF  | N   | Marginal Effect       |                         |         | Treatment Stratified Effects |                  |                   |                   | Test of Interaction |            |            |
|------------|-------------|------------|--------|------|-----|-----------------------|-------------------------|---------|------------------------------|------------------|-------------------|-------------------|---------------------|------------|------------|
|            |             |            |        |      |     | Likelihood ratio test |                         | Placebo | Bupropion                    | Patch            | Spray             | Observed P        | Adjusted P          | Observed P | Adjusted P |
|            |             |            |        |      |     | SNP OR (95% CI)       | Observed P              |         |                              |                  |                   |                   |                     |            |            |
| rs9912608  | GRB2        | 17         | Female | 0.27 | 386 | 0.77 (0.47-1.26)      | 0.30                    | 0.62    | 1.38 (0.45-4.21)             | 0.29 (0.10-0.85) | 1.27 (0.52-3.09)  | 0.67 (0.23-1.94)  | 0.12                | 0.34       |            |
| rs4789172  | GRB2        | 17         | Male   | 0.25 | 402 | 1.05 (0.63-1.73)      | 0.86                    | 1.00    | 0.62 (0.21-1.82)             | 1.06 (0.46-2.46) | 1.10 (0.30-4.01)  | 1.60 (0.59-4.34)  | 0.66                | 0.97       |            |
| rs1369299  | GRB2        | 17         | Female | 0.48 | 386 | 1.23 (0.88-1.70)      | 0.22                    | 0.64    | 1.31 (0.60-2.86)             | 1.71 (0.95-3.08) | 0.90 (0.49-1.64)  | 1.08 (0.51-2.26)  | 0.49                | 0.81       |            |
| rs4789176  | GRB2        | 17         | Male   | 0.49 | 402 | 0.81 (0.56-1.16)      | 0.25                    | 0.79    | 1.58 (0.73-3.43)             | 0.71 (0.38-1.33) | 0.68 (0.27-1.69)  | 0.57 (0.27-1.20)  | 0.25                | 0.60       |            |
| rs4350602  | GRB2        | 17         | Female | 0.18 | 385 | 0.70 (0.40-1.20)      | 0.19                    | 0.64    | 0.89 (0.30-2.65)             | 0.54 (0.18-1.65) | 0.85 (0.31-2.29)  | 0.54 (0.16-1.82)  | 0.87                | 0.99       |            |
| rs9902966  | GRB2        | 17         | Male   | 0.18 | 403 | 0.96 (0.57-1.63)      | 0.88                    | 0.96    | 0.58 (0.17-1.94)             | 1.05 (0.44-2.51) | 0.71 (0.17-2.94)  | 1.51 (0.54-4.22)  | 0.64                | 0.96       |            |
| rs4789178  | GRB2        | 17         | Female | 0.18 | 386 | 0.69 (0.40-1.19)      | 0.18                    | 0.62    | 0.89 (0.30-2.65)             | 0.54 (0.18-1.65) | 0.85 (0.31-2.29)  | 0.52 (0.15-1.76)  | 0.86                | 0.99       |            |
| rs4789182  | GRB2        | 17         | Male   | 0.18 | 403 | 0.96 (0.57-1.63)      | 0.88                    | 0.96    | 0.58 (0.17-1.94)             | 1.05 (0.44-2.51) | 0.71 (0.17-2.94)  | 1.51 (0.54-4.22)  | 0.64                | 0.96       |            |
| rs2053156  | GRB2        | 17         | Female | 0.30 | 386 | 0.74 (0.45-1.20)      | 0.22                    | 0.54    | 1.45 (0.45-4.64)             | 0.31 (0.12-0.84) | 1.27 (0.52-3.09)  | 0.56 (0.19-1.62)  | 0.11                | 0.31       |            |
| rs9909076  | GRB2        | 17         | Male   | 0.29 | 403 | 1.26 (0.76-2.08)      | 0.36                    | 0.86    | 0.94 (0.34-2.60)             | 1.33 (0.57-3.10) | 0.89 (0.24-3.21)  | 1.94 (0.71-5.36)  | 0.72                | 0.98       |            |
| rs4789189  | GRB2        | 17         | Female | 0.20 | 385 | 0.71 (0.42-1.21)      | 0.20                    | 0.65    | 0.82 (0.27-2.46)             | 0.66 (0.23-1.88) | 0.79 (0.29-2.13)  | 0.59 (0.19-1.84)  | 0.97                | 0.99       |            |
| rs4789182  | GRB2        | 17         | Male   | 0.19 | 402 | 0.96 (0.57-1.62)      | 0.87                    | 0.99    | 0.55 (0.17-1.83)             | 1.20 (0.51-2.82) | 0.68 (0.16-2.81)  | 1.32 (0.48-3.66)  | 0.62                | 0.95       |            |
| rs2053156  | GRB2        | 17         | Female | 0.20 | 386 | 0.70 (0.41-1.20)      | 0.19                    | 0.63    | 0.80 (0.27-2.38)             | 0.64 (0.23-1.83) | 0.79 (0.29-2.13)  | 0.59 (0.19-1.84)  | 0.97                | 0.98       |            |
| rs9909076  | GRB2        | 17         | Male   | 0.19 | 403 | 0.95 (0.56-1.60)      | 0.85                    | 1.00    | 0.55 (0.17-1.83)             | 1.17 (0.50-2.74) | 0.68 (0.16-2.81)  | 1.33 (0.48-3.67)  | 0.64                | 0.96       |            |
| rs4788891  | GRB2        | 17         | Female | 0.32 | 386 | 0.75 (0.46-1.22)      | 0.25                    | 0.58    | 1.38 (0.43-4.41)             | 0.36 (0.14-0.95) | 1.19 (0.49-2.91)  | 0.60 (0.21-1.70)  | 0.20                | 0.51       |            |
| rs9909076  | GRB2        | 17         | Male   | 0.30 | 402 | 1.27 (0.77-2.10)      | 0.35                    | 0.85    | 0.91 (0.33-2.54)             | 1.54 (0.65-3.63) | 0.85 (0.23-3.08)  | 1.73 (0.63-4.75)  | 0.72                | 0.98       |            |
| rs4788891  | GRB2        | 17         | Female | 0.20 | 386 | 0.71 (0.42-1.20)      | 0.20                    | 0.63    | 0.80 (0.27-2.38)             | 0.66 (0.23-1.87) | 0.79 (0.29-2.13)  | 0.59 (0.19-1.84)  | 0.98                | 0.98       |            |
| rs9909076  | GRB2        | 17         | Male   | 0.19 | 403 | 0.95 (0.56-1.60)      | 0.85                    | 1.00    | 0.55 (0.17-1.83)             | 1.17 (0.50-2.74) | 0.68 (0.16-2.81)  | 1.33 (0.48-3.67)  | 0.64                | 0.96       |            |
| rs4789189  | GRB2        | 17         | Female | 0.20 | 383 | 0.70 (0.41-1.19)      | 0.18                    | 0.63    | 0.80 (0.27-2.38)             | 0.66 (0.23-1.87) | 0.79 (0.29-2.13)  | 0.59 (0.19-1.84)  | 0.98                | 0.98       |            |
| rs9909076  | GRB2        | 17         | Male   | 0.19 | 403 | 0.95 (0.56-1.60)      | 0.85                    | 1.00    | 0.55 (0.17-1.83)             | 1.17 (0.50-2.74) | 0.68 (0.16-2.81)  | 1.33 (0.48-3.67)  | 0.64                | 0.96       |            |
| rs9908820  | GRB2        | 17         | Female | 0.20 | 383 | 0.70 (0.41-1.19)      | 0.18                    | 0.63    | 0.80 (0.27-2.38)             | 0.66 (0.23-1.87) | 0.79 (0.29-2.13)  | 0.59 (0.19-1.84)  | 0.98                | 0.98       |            |
| rs8065441  | GRB2        | 17         | Male   | 0.33 | 386 | 0.79 (0.55-1.13)      | 0.19                    | 0.64    | 1.18 (0.57-2.44)             | 0.40 (0.19-0.88) | 1.12 (0.55-2.24)  | 0.71 (0.31-1.62)  | 0.15                | 0.40       |            |
| rs12608148 | ADCYAP1     | 18         | Female | 0.30 | 403 | 1.17 (0.81-1.69)      | 0.41                    | 0.89    | 0.88 (0.39-2.00)             | 1.08 (0.61-1.89) | 1.34 (0.49-3.66)  | 1.64 (0.76-3.55)  | 0.72                | 0.97       |            |
| rs4797325  | ADCYAP1     | 18         | Male   | 0.13 | 386 | 0.63 (0.35-1.14)      | 0.12                    | 0.49    | 0.66 (0.21-2.09)             | 0.53 (0.16-1.69) | 0.91 (0.30-2.80)  | 0.48 (0.13-1.81)  | 0.88                | 0.99       |            |
| rs1599789  | ADCYAP1     | 18         | Female | 0.14 | 402 | 1.10 (0.65-1.86)      | 0.74                    | 0.99    | 1.04 (0.37-2.97)             | 0.91 (0.38-2.18) | 0.96 (0.24-3.80)  | 1.79 (0.58-4.57)  | 0.82                | 0.92       |            |
| rs2040176  | ADCYAP1     | 18         | Male   | 0.27 | 386 | 0.87 (0.53-1.41)      | 0.57                    | 0.99    | 0.63 (0.21-1.93)             | 1.06 (0.43-2.61) | 1.05 (0.43-2.55)  | 0.68 (0.24-1.98)  | 0.83                | 0.97       |            |
| rs1916610  | ADCYAP1     | 18         | Female | 0.31 | 402 | 0.92 (0.56-1.51)      | 0.73                    | 0.98    | 0.54 (0.19-1.53)             | 1.24 (0.53-2.90) | 0.60 (0.17-2.17)  | 1.28 (0.47-3.44)  | 0.50                | 0.98       |            |
| rs2040176  | ADCYAP1     | 18         | Male   | 0.42 | 396 | 0.74 (0.44-1.26)      | 0.28                    | 0.93    | 0.54 (0.18-1.63)             | 0.73 (0.29-1.83) | 1.76 (0.64-4.92)  | 0.92 (0.29-2.93)  | 0.43                | 0.92       |            |
| rs1916610  | ADCYAP1     | 18         | Female | 0.27 | 386 | 0.87 (0.58-1.32)      | 0.52                    | 0.99    | 0.41 (0.14-1.18)             | 0.95 (0.37-2.44) | 0.73 (0.19-2.76)  | 1.00 (0.35-2.84)  | 0.61                | 0.99       |            |
| rs2040176  | ADCYAP1     | 18         | Male   | 0.24 | 403 | 0.72 (0.46-1.11)      | 0.13                    | 0.72    | 0.88 (0.34-2.27)             | 0.72 (0.33-1.56) | 1.30 (0.60-2.81)  | 0.69 (0.30-1.62)  | 0.68                | 0.98       |            |
| rs1916610  | ADCYAP1     | 18         | Female | 0.11 | 386 | 0.50 (0.26-0.99)      | 0.04                    | 0.36    | 0.64 (0.25-1.67)             | 0.70 (0.35-1.39) | 0.86 (0.30-2.48)  | 0.74 (0.30-1.81)  | 0.98                | 0.98       |            |
| rs11081411 | ADCYAP1     | 18         | Male   | 0.12 | 403 | 0.78 (0.41-1.46)      | 0.42                    | 0.99    | 0.28 (0.03-2.10)             | 0.67 (0.22-2.06) | 0.79 (0.26-2.38)  | 0.17 (0.02-1.35)  | 0.46                | 0.93       |            |
| rs11665625 | ADCYAP1     | 18         | Female | 0.46 | 386 | 1.11 (0.78-1.58)      | 0.55                    | 0.99    | 0.79 (0.23-2.69)             | 0.55 (0.19-1.60) | 1.21 (0.23-6.44)  | 1.02 (0.30-3.50)  | 0.83                | 0.99       |            |
| rs12608148 | ADCYAP1     | 18         | Male   | 0.17 | 381 | 1.09 (0.72-1.65)      | 0.70                    | 0.99    | 1.45 (0.66-3.20)             | 1.11 (0.57-2.17) | 0.69 (0.36-1.34)  | 1.68 (0.77-3.63)  | 0.31                | 0.85       |            |
| rs12608148 | ADCYAP1     | 18         | Female | 0.13 | 401 | 0.65 (0.37-1.13)      | 0.11                    | 0.71    | 1.68 (0.80-3.53)             | 1.24 (0.65-2.36) | 1.53 (0.64-3.65)  | 1.05 (0.49-2.34)  | 0.83                | 1.00       |            |
| rs12608148 | ADCYAP1     | 18         | Male   | 0.47 | 385 | 1.60 (1.12-2.28)      | 9.05 × 10 <sup>-3</sup> | 0.12    | 0.89 (0.36-2.21)             | 0.84 (0.40-1.74) | 1.67 (0.72-3.86)  | 1.31 (0.50-3.29)  | 0.61                | 0.97       |            |
| rs12608148 | ADCYAP1     | 18         | Female | 0.44 | 402 | 1.13 (0.79-1.62)      | 0.50                    | 0.99    | 0.53 (0.12-2.29)             | 0.78 (0.37-1.64) | 0.72 (0.16-3.21)  | 0.38 (0.08-1.75)  | 0.83                | 1.00       |            |
| rs12608148 | ADCYAP1     | 18         | Male   | 0.32 | 384 | 1.47 (1.02-2.12)      | 0.04                    | 0.36    | 2.24 (0.99-5.04)             | 1.16 (0.57-2.38) | 1.28 (0.70-2.36)  | 2.34 (1.06-5.14)  | 0.41                | 0.93       |            |
| rs12608148 | ADCYAP1     | 18         | Female | 0.32 | 403 | 1.40 (0.96-2.05)      | 0.08                    | 0.60    | 1.81 (0.85-3.85)             | 1.03 (0.58-1.82) | 1.27 (0.49-3.28)  | 0.75 (0.35-1.63)  | 0.43                | 0.96       |            |
| rs12608148 | ADCYAP1     | 18         | Male   | 0.30 | 380 | 0.92 (0.65-1.31)      | 0.65                    | 0.99    | 2.26 (1.05-4.88)             | 1.17 (0.57-2.39) | 1.02 (0.53-1.97)  | 2.19 (0.94-5.09)  | 0.30                | 0.85       |            |
| rs12608148 | ADCYAP1     | 18         | Female | 0.27 | 397 | 0.78 (0.54-1.14)      | 0.19                    | 0.85    | 2.05 (0.99-4.23)             | 1.24 (0.65-2.36) | 1.63 (0.62-4.32)  | 3.96 (0.43-2.15)  | 0.54                | 0.98       |            |
| rs12608148 | ADCYAP1     | 18         | Male   | 0.11 | 386 | 0.61 (0.32-1.15)      | 0.11                    | 0.70    | 0.65 (0.26-1.59)             | 0.92 (0.48-1.75) | 1.07 (0.55-2.06)  | 0.99 (0.49-1.99)  | 0.84                | 0.97       |            |
| rs12608148 | ADCYAP1     | 18         | Female | 0.12 | 403 | 0.78 (0.41-1.45)      | 0.42                    | 0.99    | 0.64 (0.28-1.46)             | 0.77 (0.42-1.40) | 1.14 (0.48-2.74)  | 0.74 (0.33-1.68)  | 0.82                | 1.00       |            |
| rs12608148 | ADCYAP1     | 18         | Male   | 0.28 | 386 | 0.82 (0.51-1.33)      | 0.43                    | 0.97    | 0.28 (0.03-2.10)             | 0.85 (0.29-2.50) | 0.99 (0.35-2.84)  | 0.17 (0.02-1.35)  | 0.28                | 0.83       |            |
| rs12608148 | ADCYAP1     | 18         | Female | 0.31 | 403 | 0.87 (0.53-1.43)      | 0.58                    | 0.99    | 0.79 (0.23-2.69)             | 0.55 (0.19-1.60) | 1.19 (0.26-6.31)  | 1.02 (0.30-3.51)  | 0.84                | 0.99       |            |
| rs12608148 | ADCYAP1     | 18         | Male   | 0.27 | 385 | 0.84 (0.52-1.37)      | 0.48                    | 0.99    | 0.60 (0.20-1.82)             | 0.95 (0.39-2.35) | 1.05 (0.43-2.55)  | 0.63 (0.22-1.83)  | 0.82                | 0.96       |            |
| rs12608148 | ADCYAP1     | 18         | Female | 0.20 | 403 | 0.95 (0.58-1.56)      | 0.84                    | 0.99    | 0.54 (0.19-1.52)             | 1.17 (0.50-2.74) | 0.60 (0.17-2.17)  | 1.13 (0.42-3.05)  | 0.59                | 0.99       |            |
| rs12608148 | ADCYAP1     | 18         | Male   | 0.10 | 386 | 0.62 (0.31-1.21)      | 0.14                    | 0.76    | 0.69 (0.22-2.10)             | 0.94 (0.38-2.31) | 0.97 (0.40-2.35)  | 0.71 (0.25-2.07)  | 0.95                | 0.95       |            |
| rs12608148 | ADCYAP1     | 18         | Female | 0.09 | 403 | 0.96 (0.52-1.79)      | 0.91                    | 0.99    | 0.54 (0.19-1.52)             | 1.28 (0.53-2.99) | 0.73 (0.20-2.64)  | 1.25 (0.46-3.38)  | 0.55                | 0.98       |            |
| rs12608148 | ADCYAP1     | 18         | Male   | 0.37 | 385 | 0.86 (0.60-1.23)      | 0.41                    | 0.97    | NA                           | 0.68 (0.12-3.27) | 0.72 (0.23-2.30)  | 1.02 (0.29-3.55)  | 0.17                | 0.70       |            |
| rs12608148 | ADCYAP1     | 18         | Female | 0.37 | 403 | 1.07 (0.73-1.55)      | 0.79                    | 1.00    | 0.86 (0.22-3.31)             | 1.42 (0.49-4.13) | 2.12 (0.61-7.34)  | 0.22 (0.03-1.67)  | 0.16                | 0.69       |            |
| rs12608148 | ADCYAP1     | 18         | Male   | 0.31 | 386 | 0.66 (0.40-1.07)      | 0.09                    | 0.63    | 0.53 (0.21-1.34)             | 1.16 (0.63-2.16) | 0.71 (0.26-1.42)  | 0.98 (0.46-2.09)  | 0.49                | 0.94       |            |
| rs12608148 | ADCYAP1     | 18         | Female | 0.31 | 402 | 0.85 (0.52-1.41)      | 0.53                    | 0.99    | 1.07 (0.52-2.20)             | 0.89 (0.41-1.73) | 2.90 (1.02-8.30)  | 0.74 (0.34-1.52)  | 0.18                | 0.69       |            |
| rs12608148 | ADCYAP1     | 18         | Male   | 0.41 | 386 | 0.91 (0.55-1.51)      | 0.71                    | 0.98    | 0.50 (0.16-1.53)             | 0.94 (0.38-2.30) | 0.48 (0.10-1.19)  | 0.79 (0.28-2.23)  | 0.70                | 0.97       |            |
| rs12608148 | ADCYAP1     | 18         | Female | 0.42 | 402 | 0.80 (0.47-1.36)      | 0.42                    | 0.99    | 0.76 (0.27-2.10)             | 0.79 (0.34-1.85) | 3.10 (0.62-15.48) | 0.55 (0.20-1.51)  | 0.28                | 0.83       |            |
| rs12608148 | ADCYAP1     | 18         | Male   | 0.30 | 386 | 0.84 (0.57-1.23)      | 0.37                    | 0.98    | 0.25 (0.03-2.31)             | 0.71 (0.28-1.78) | 0.75 (0.29-1.53)  | 3.09 (0.82-11.70) | 0.17                | 0.70       |            |
| rs12608148 | ADCYAP1     | 18         | Female | 0.32 | 402 | 0.99 (0.68-1.46)      | 0.97                    | 0.97    | 0.97 (0.34-2.72)             | 0.59 (0.24-1.44) | 3.96 (0.47-33.10) | 0.54 (0.20-1.48)  | 0.23                | 0.79       |            |
| rs12608148 | ADCYAP1     | 18         | Male   | 0.39 | 386 | 0.93 (0.56-1.54)      | 0.78                    | 0.96    | 0.58 (0.21-1.61)             | 0.91 (0.46-1.77) | 0.75 (0.37-1.52)  | 1.13 (0.50-2.59)  | 0.76                | 0.98       |            |
| rs12608148 | ADCYAP1     | 18         | Female | 0.40 | 402 | 1.05 (0.63-1.75)      | 0.86                    | 0.91    | 0.92 (0.42-1.98)             | 1.01 (0.51-2.00) | 2.16 (0.8         |                   |                     |            |            |

| SNP        | Gene Region    | Chromosome | Gender | MAF                | N   | Marginal Effect  |            |            | Treatment Stratified Effects |                  |                   |                   | Test of Interaction |                    |            |
|------------|----------------|------------|--------|--------------------|-----|------------------|------------|------------|------------------------------|------------------|-------------------|-------------------|---------------------|--------------------|------------|
|            |                |            |        |                    |     | SNP OR (95% CI)  |            | Observed P | Likelihood ratio test        | Placebo          | Bupropion         | Patch             | Spray               | Observed P         | Adjusted P |
|            |                |            |        |                    |     | SNP OR (95% CI)  | Observed P | Adjusted P | SNP OR (95% CI)              | SNP OR (95% CI)  | SNP OR (95% CI)   | SNP OR (95% CI)   | Observed P          | Adjusted P         |            |
| rs6141600  | <i>EPB41L1</i> | 20         | Male   | 0.30               | 370 | 0.71 (0.43-1.18) | 0.18       | 0.55       | 0.76 (0.24-2.38)             | 0.34 (0.12-0.91) | 0.82 (0.32-2.04)  | 1.41 (0.46-4.28)  | 0.27                | 0.39               |            |
|            |                |            | Female | 0.27               | 395 | 1.16 (0.70-1.93) | 0.58       | 0.93       | 1.72 (0.61-4.88)             | 0.76 (0.32-1.81) | 1.75 (0.45-6.79)  | 1.11 (0.40-3.11)  | 0.61                | 0.87               |            |
| rs6121156  | <i>EPB41L1</i> | 20         | Male   | $3.81 \times 10^3$ | NA  | NA               | NA         | NA         | NA                           | NA               | NA                | NA                | NA                  | NA                 |            |
|            |                |            | Female | $1.24 \times 10^3$ | NA  | NA               | NA         | NA         | NA                           | NA               | NA                | NA                | NA                  | NA                 |            |
| rs6142512  | <i>EPB41L1</i> | 20         | Male   | 0.16               | 386 | 0.73 (0.42-1.26) | 0.25       | 0.65       | 1.40 (0.42-4.61)             | 0.41 (0.13-1.24) | 0.78 (0.29-2.10)  | 0.76 (0.25-2.27)  | 0.53                | 0.63               |            |
|            |                |            | Female | 0.18               | 403 | 0.91 (0.53-1.55) | 0.71       | 0.92       | 2.32 (0.82-6.51)             | 0.46 (0.18-1.19) | 1.70 (0.47-6.21)  | 0.48 (0.13-1.82)  | 0.07                | 0.15               |            |
| rs1474976  | <i>EPB41L1</i> | 20         | Male   | 0.09               | 386 | 0.84 (0.46-1.53) | 0.56       | 0.56       | 0.86 (0.23-3.19)             | 2.19 (0.92-5.22) | NA                | 0.31 (0.04-2.57)  | $2.92 \times 10^3$  | $8.45 \times 10^3$ |            |
|            |                |            | Female | 0.12               | 403 | 1.35 (0.79-2.29) | 0.28       | 0.72       | 0.70 (0.18-2.73)             | 2.01 (0.81-5.00) | 1.47 (0.39-5.56)  | 1.22 (0.47-3.14)  | 0.62                | 0.87               |            |
| rs6121163  | <i>EPB41L1</i> | 20         | Male   | 0.06               | NA  | NA               | NA         | NA         | NA                           | NA               | NA                | NA                | NA                  | NA                 |            |
|            |                |            | Female | 0.05               | NA  | NA               | NA         | NA         | NA                           | NA               | NA                | NA                | NA                  | NA                 |            |
| rs7266316  | <i>EPB41L1</i> | 20         | Male   | 0.00               | NA  | NA               | NA         | NA         | NA                           | NA               | NA                | NA                | NA                  | NA                 |            |
|            |                |            | Female | $1.24 \times 10^3$ | NA  | NA               | NA         | NA         | NA                           | NA               | NA                | NA                | NA                  | NA                 |            |
| rs6060831  | <i>EPB41L1</i> | 20         | Male   | $1.27 \times 10^3$ | NA  | NA               | NA         | NA         | NA                           | NA               | NA                | NA                | NA                  | NA                 |            |
|            |                |            | Female | 0.00               | NA  | NA               | NA         | NA         | NA                           | NA               | NA                | NA                | NA                  | NA                 |            |
| rs6058429  | <i>EPB41L1</i> | 20         | Male   | 0.06               | NA  | NA               | NA         | NA         | NA                           | NA               | NA                | NA                | NA                  | NA                 |            |
|            |                |            | Female | 0.05               | NA  | NA               | NA         | NA         | NA                           | NA               | NA                | NA                | NA                  | NA                 |            |
| rs6060845  | <i>EPB41L1</i> | 20         | Male   | 0.24               | 386 | 0.84 (0.51-1.37) | 0.48       | 0.78       | 1.22 (0.41-3.67)             | 0.36 (0.14-0.98) | 0.85 (0.34-2.12)  | 1.60 (0.56-4.55)  | 0.18                | 0.28               |            |
|            |                |            | Female | 0.25               | 402 | 1.26 (0.77-2.09) | 0.36       | 0.73       | 1.90 (0.67-5.39)             | 0.93 (0.40-2.17) | 1.09 (0.30-3.92)  | 1.45 (0.53-3.97)  | 0.75                | 0.75               |            |
| rs2247688  | <i>EPB41L1</i> | 20         | Male   | 0.24               | 386 | 0.84 (0.51-1.38) | 0.49       | 0.74       | 1.30 (0.43-3.90)             | 0.40 (0.15-1.08) | 1.13 (0.46-2.78)  | 0.94 (0.33-2.68)  | 0.35                | 0.45               |            |
|            |                |            | Female | 0.25               | 403 | 1.11 (0.67-1.83) | 0.68       | 0.95       | 1.94 (0.68-5.50)             | 0.83 (0.36-1.93) | 1.07 (0.30-3.85)  | 1.01 (0.37-2.79)  | 0.65                | 0.68               |            |
| rs6121179  | <i>EPB41L1</i> | 20         | Male   | 0.18               | 385 | 0.76 (0.45-1.28) | 0.29       | 0.64       | 1.12 (0.35-3.65)             | 0.59 (0.22-1.62) | 0.92 (0.36-2.33)  | 0.55 (0.18-1.73)  | 0.78                | 0.78               |            |
|            |                |            | Female | 0.19               | 400 | 0.98 (0.58-1.66) | 0.93       | 0.93       | 2.42 (0.85-6.88)             | 0.48 (0.19-1.26) | 1.41 (0.39-5.13)  | 0.71 (0.21-2.40)  | 0.12                | 0.26               |            |
| rs6119707  | <i>EPB41L1</i> | 20         | Male   | 0.00               | NA  | NA               | NA         | NA         | NA                           | NA               | NA                | NA                | NA                  | NA                 |            |
|            |                |            | Female | 0.00               | NA  | NA               | NA         | NA         | NA                           | NA               | NA                | NA                | NA                  | NA                 |            |
| rs11700361 | <i>EPB41L1</i> | 20         | Male   | 0.16               | 386 | 0.67 (0.38-1.16) | 0.14       | 0.47       | 1.60 (0.48-5.31)             | 0.53 (0.19-1.53) | 0.64 (0.24-1.72)  | 0.44 (0.13-1.48)  | 0.46                | 0.57               |            |
|            |                |            | Female | 0.18               | 402 | 1.08 (0.63-1.83) | 0.79       | 0.87       | 2.95 (1.03-8.44)             | 0.50 (0.19-1.30) | 1.60 (0.44-5.82)  | 0.75 (0.22-2.55)  | 0.07                | 0.16               |            |
| rs709050   | <i>EPB41L1</i> | 20         | Male   | 0.19               | 385 | 0.76 (0.45-1.27) | 0.29       | 0.66       | 1.08 (0.33-3.52)             | 0.46 (0.17-1.25) | 1.02 (0.41-2.54)  | 0.69 (0.23-2.07)  | 0.63                | 0.67               |            |
|            |                |            | Female | 0.19               | 403 | 0.86 (0.50-1.47) | 0.57       | 0.94       | 1.92 (0.69-5.38)             | 0.45 (0.17-1.16) | 1.01 (0.27-3.84)  | 0.77 (0.23-2.61)  | 0.22                | 0.42               |            |
| rs965808   | <i>GNAS</i>    | 20         | Male   | 0.24               | 386 | 1.21 (0.74-1.97) | 0.45       | 1.00       | 0.63 (0.20-1.93)             | 1.26 (0.51-3.12) | 1.28 (0.52-3.14)  | 1.91 (0.66-5.51)  | 0.56                | 0.89               |            |
|            |                |            | Female | 0.25               | 402 | 1.16 (0.70-1.92) | 0.57       | 1.00       | 1.38 (0.49-3.87)             | 0.75 (0.31-1.81) | 0.36 (0.09-1.48)  | 3.54 (1.22-10.26) | 0.04                | 0.26               |            |
| rs3761264  | <i>GNAS</i>    | 20         | Male   | 0.43               | 385 | 0.99 (0.59-1.68) | 0.98       | 1.00       | 2.97 (0.77-11.44)            | 0.62 (0.24-1.63) | 0.85 (0.32-2.27)  | 0.90 (0.30-2.70)  | 0.27                | 0.83               |            |
|            |                |            | Female | 0.45               | 403 | 1.00 (0.58-1.70) | 0.99       | 0.99       | 2.28 (0.61-8.56)             | 0.73 (0.31-1.76) | 6.69 (0.81-55.30) | 0.37 (0.13-1.02)  | 0.01                | 0.13               |            |
| rs6064714  | <i>GNAS</i>    | 20         | Male   | 0.14               | 385 | 0.49 (0.27-0.88) | 0.01       | 0.18       | 0.21 (0.03-1.53)             | 0.37 (0.10-1.34) | 0.35 (0.11-1.10)  | 1.26 (0.46-3.43)  | 0.21                | 0.77               |            |
|            |                |            | Female | 0.13               | 402 | 1.17 (0.71-1.91) | 0.55       | 1.00       | 0.95 (0.35-2.58)             | 1.37 (0.66-2.87) | NA                | 1.53 (0.52-4.08)  | 0.29                | 0.82               |            |
| rs1800900  | <i>GNAS</i>    | 20         | Male   | 0.39               | 338 | 0.97 (0.56-1.68) | 0.91       | 1.00       | 0.90 (0.24-3.31)             | 0.98 (0.36-2.69) | 1.87 (0.65-5.40)  | 0.45 (0.14-1.43)  | 0.35                | 0.87               |            |
|            |                |            | Female | 0.39               | 371 | 1.17 (0.68-2.00) | 0.57       | 1.00       | 1.57 (0.51-4.84)             | 0.81 (0.34-1.91) | 0.59 (0.14-2.45)  | 2.52 (0.74-8.58)  | 0.32                | 0.84               |            |
| rs4810147  | <i>GNAS</i>    | 20         | Male   | 0.47               | 386 | 1.05 (0.61-1.82) | 0.86       | 1.00       | 4.17 (0.87-19.98)            | 0.75 (0.27-2.05) | 0.89 (0.32-2.46)  | 0.71 (0.23-2.15)  | 0.19                | 0.72               |            |
|            |                |            | Female | 0.47               | 403 | 1.04 (0.61-1.78) | 0.89       | 1.00       | 2.40 (0.64-9.00)             | 0.71 (0.29-1.70) | 6.19 (0.75-51.24) | 0.44 (0.16-1.23)  | 0.03                | 0.21               |            |
| rs6015389  | <i>GNAS</i>    | 20         | Male   | 0.36               | 384 | 0.73 (0.50-1.07) | 0.10       | 0.76       | 0.44 (0.18-1.06)             | 1.00 (0.46-2.14) | 0.74 (0.37-1.50)  | 0.83 (0.38-1.82)  | 0.55                | 0.93               |            |
|            |                |            | Female | 0.34               | 398 | 1.09 (0.76-1.56) | 0.64       | 1.00       | 0.97 (0.47-2.01)             | 1.17 (0.64-2.15) | 0.45 (0.14-1.41)  | 1.66 (0.82-3.36)  | 0.24                | 0.80               |            |
| rs6026561  | <i>GNAS</i>    | 20         | Male   | 0.36               | 383 | 0.74 (0.50-1.08) | 0.12       | 0.80       | 0.44 (0.18-1.06)             | 1.00 (0.46-2.14) | 0.79 (0.39-1.60)  | 0.81 (0.37-1.77)  | 0.55                | 0.93               |            |
|            |                |            | Female | 0.34               | 402 | 1.06 (0.74-1.52) | 0.73       | 1.00       | 0.87 (0.42-1.80)             | 1.19 (0.65-2.18) | 0.45 (0.14-1.41)  | 1.66 (0.82-3.36)  | 0.21                | 0.76               |            |
| rs8125112  | <i>GNAS</i>    | 20         | Male   | 0.15               | 374 | 0.60 (0.34-1.07) | 0.07       | 0.65       | 0.23 (0.03-1.71)             | 0.76 (0.27-2.13) | 0.28 (0.08-0.99)  | 1.59 (0.57-4.46)  | 0.10                | 0.54               |            |
|            |                |            | Female | 0.14               | 393 | 1.28 (0.80-2.06) | 0.31       | 0.99       | 1.23 (0.47-3.21)             | 1.86 (0.94-3.66) | NA                | 0.84 (0.28-2.48)  | 0.17                | 0.72               |            |
| rs6064716  | <i>GNAS</i>    | 20         | Male   | 0.12               | 386 | 0.59 (0.33-1.08) | 0.07       | 0.66       | 0.26 (0.04-1.90)             | 0.64 (0.19-2.16) | 0.34 (0.10-1.19)  | 1.34 (0.50-3.64)  | 0.25                | 0.82               |            |
|            |                |            | Female | 0.12               | 403 | 1.24 (0.75-2.07) | 0.41       | 1.00       | 1.32 (0.51-3.38)             | 1.52 (0.73-3.18) | NA                | 1.03 (0.32-3.31)  | 0.40                | 0.90               |            |
| rs2145288  | <i>GNAS</i>    | 20         | Male   | 0.27               | 386 | 1.06 (0.65-1.72) | 0.83       | 1.00       | 0.55 (0.18-1.65)             | 0.62 (0.25-1.52) | 2.03 (0.82-5.00)  | 1.66 (0.58-4.75)  | 0.14                | 0.62               |            |
|            |                |            | Female | 0.29               | 402 | 1.27 (0.77-2.10) | 0.35       | 1.00       | 1.76 (0.63-4.90)             | 0.87 (0.37-2.04) | 0.44 (0.12-1.65)  | 3.27 (1.08-9.96)  | 0.08                | 0.46               |            |
| rs6026567  | <i>GNAS</i>    | 20         | Male   | 0.43               | 386 | 1.03 (0.61-1.71) | 0.92       | 1.00       | 0.84 (0.28-2.51)             | 1.50 (0.57-3.94) | 0.82 (0.31-2.17)  | 1.00 (0.33-3.00)  | 0.81                | 0.81               |            |
|            |                |            | Female | 0.42               | 403 | 1.25 (0.72-2.17) | 0.42       | 1.00       | 1.42 (0.42-4.75)             | 1.03 (0.42-2.57) | 3.30 (0.66-16.53) | 0.88 (0.31-2.48)  | 0.52                | 0.91               |            |
| rs12625436 | <i>GNAS</i>    | 20         | Male   | 0.40               | 386 | 0.91 (0.65-1.28) | 0.58       | 1.00       | 0.86 (0.36-2.04)             | 1.28 (0.67-2.43) | 0.70 (0.38-1.30)  | 0.90 (0.46-1.75)  | 0.62                | 0.93               |            |
|            |                |            | Female | 0.40               | 403 | 1.18 (0.81-1.71) | 0.39       | 1.00       | 1.03 (0.47-2.28)             | 1.40 (0.75-2.59) | 1.70 (0.67-4.26)  | 0.82 (0.39-1.74)  | 0.59                | 0.94               |            |
| rs7271854  | <i>GNAS</i>    | 20         | Male   | 0.40               | 377 | 0.74 (0.45-1.23) | 0.25       | 0.97       | 0.62 (0.21-1.88)             | 1.10 (0.42-2.84) | 1.04 (0.39-2.73)  | 0.36 (0.12-1.04)  | 0.38                | 0.87               |            |
|            |                |            | Female | 0.38               | 400 | 0.98 (0.58-1.66) | 0.94       | 1.00       | 1.17 (0.35-3.98)             | 0.92 (0.38-2.21) | 1.50 (0.40-5.61)  | 0.73 (0.27-1.98)  | 0.84                | 0.99               |            |
| rs4810148  | <i>GNAS</i>    | 20         | Male   | 0.35               | 386 | 0.80 (0.55-1.16) | 0.23       | 0.96       | 0.71 (0.29-1.76)             | 1.26 (0.63-2.53) | 0.83 (0.41-1.68)  | 0.48 (0.22-1.09)  | 0.34                | 0.88               |            |
|            |                |            | Female | 0.33               | 403 | 0.94 (0.64-1.39) | 0.76       | 1.00       | 1.15 (0.52-2.51)             | 1.06 (0.55-2.04) | 0.89 (0.32-2.45)  | 0.69 (0.31-1.52)  | 0.80                | 0.99               |            |
| rs2180696  | <i>GNAS</i>    | 20         | Male   | 0.41               | 386 | 0.90 (0.64-1.28) | 0.56       | 1.00       | 0.88 (0.39-1.96)             | 0.91 (0.48-1.73) | 1.31 (0.66-2.62)  | 0.62 (0.30-1.26)  | 0.52                | 0.94               |            |
|            |                |            | Female | 0.39               | 403 | 0.87 (0.60-1.26) | 0.46       | 1.00       | 0.89 (0.42-1.89)             | 0.80 (0.42-1.51) | 0.95 (0.36-2.49)  | 0.90 (0.44-1.86)  | 0.99                | 0.99               |            |
| rs6026574  | <i>GNAS</i>    | 20         | Male   | 0.35               | 384 | 1.24 (0.75-2.04) | 0.40       | 1.00       | 1.31 (0.43-4.02)             | 1.48 (0.58-3.77) | 0.56 (0.22-1.42)  | 2.64 (0.85-8.20)  | 0.19                | 0.73               |            |
|            |                |            | Female | 0.38               | 402 | 1.00 (0.60-1.69) | 0.99       | 1.00       | 0.90 (0.32-2.52)             | 1.30 (0.53-3.20) | 0.76 (0.21-2.75)  | 0.94 (0.33-2.66)  | 0.90                | 0.99               |            |
| rs4812042  | <i>GNAS</i>    | 20         | Male   | 0.40               | 386 | 1.08 (0.76-1.54) | 0.66       | 1.00       | 1.30 (0.61-2.78)             | 1.10 (0.59-2.05) | 0.70 (0.35-1.40)  | 1.57 (0.70-3.51)  | 0.45                | 0.91               |            |
|            |                |            | Female | 0.42               | 403 | 1.00 (0.70-1.44) | 0.99       | 1.00       | 0.72 (0.33-1.56)             | 1.49 (0.82-2.72) | 1.16 (0.44-3.06)  | 0.70 (0.34-1.45)  | 0.33                | 0.84               |            |
| rs6092704  | <i>GNAS</i>    | 20         | Male   | 0.12               | 386 | 1.00 (0.59-1.69) | 1.00       | 1.00       | 0.97 (0.27-3.57)             | 0.48 (0.16-1.50) | 1.13 (0.47-2.75)  | 1.98 (0.68-5.72)  | 0.33                | 0.91               |            |
|            |                |            | Female | 0.08               | 403 | 0.88 (0.46-1.68) | 0.69       | 1.00       | 1.13 (0.28-4.48)             | 0.59 (0.19-1.81) | NA                | 1.90 (0.62-5.77)  | 0.19                | 0.76               |            |
| rs2057291  | <i>GNAS</i>    | 20         | Male   | 0.36               | 386 | 1.21 (0.85-1.73) | 0.30       | 0.98       | 1.25 (0.57-2.78)             | 1.31 (0.69-2.47) | 0.84 (0.42-1.69)  | 1.66 (0.76-3.62)  | 0.62                | 0.86               |            |
|            |                |            | Female | 0.38               | 403 | 0.95 (0.66-1.38) | 0          |            |                              |                  |                   |                   |                     |                    |            |

| SNP        | Gene Region | Chromosome | Gender | MAF  | N   | Marginal Effect       |                         |                 |                   | Treatment Stratified Effects |                         |                           |                       | Test of Interaction |                 |
|------------|-------------|------------|--------|------|-----|-----------------------|-------------------------|-----------------|-------------------|------------------------------|-------------------------|---------------------------|-----------------------|---------------------|-----------------|
|            |             |            |        |      |     | Likelihood ratio test |                         | SNP OR (95% CI) | Observed P        | Adjusted P                   | Placebo SNP OR (95% CI) | Bupropion SNP OR (95% CI) | Patch SNP OR (95% CI) |                     |                 |
|            |             |            |        |      |     | SNP OR (95% CI)       | Observed P              |                 |                   |                              |                         |                           |                       | Adjusted P          | SNP OR (95% CI) |
| rs2273504  | CHRNA4      | 20         | Male   | 0.16 | 347 | 1.23 (0.71-2.14)      | 0.46                    | 0.96            | 1.47 (0.40-5.42)  | 0.54 (0.19-1.55)             | 2.50 (0.93-6.73)        | 1.24 (0.39-3.95)          | 0.21                  | 0.62                |                 |
|            |             |            | Female | 0.18 | 367 | 0.99 (0.57-1.74)      | 0.98                    | 0.98            | 1.00 (0.29-3.44)  | 0.54 (0.20-1.50)             | 1.74 (0.42-7.20)        | 1.46 (0.52-4.13)          | 0.46                  | 0.91                |                 |
| rs6010918  | CHRNA4      | 20         | Male   | 0.06 | NA  | NA                    | NA                      | NA              | NA                | NA                           | NA                      | NA                        | NA                    | NA                  |                 |
|            |             |            | Female | 0.04 | NA  | NA                    | NA                      | NA              | NA                | NA                           | NA                      | NA                        | NA                    | NA                  |                 |
| rs2273505  | CHRNA4      | 20         | Male   | 0.07 | 353 | 1.00 (0.47-2.16)      | 0.99                    | 0.99            | 2.14 (0.56-8.20)  | 0.52 (0.10-2.60)             | 0.53 (0.11-2.57)        | 2.29 (0.37-13.98)         | 0.34                  | 0.82                |                 |
|            |             |            | Female | 0.07 | 379 | 0.52 (0.21-1.29)      | 0.13                    | 0.50            | 1.28 (0.32-5.18)  | 0.43 (0.09-2.05)             | NA                      | 0.28 (0.03-2.38)          | 0.40                  | 0.86                |                 |
| rs755203   | CHRNA4      | 20         | Male   | 0.44 | 354 | 0.80 (0.47-1.36)      | 0.41                    | 0.95            | 1.49 (0.37-6.05)  | 0.34 (0.13-0.90)             | 0.94 (0.36-2.45)        | 1.36 (0.38-4.77)          | 0.20                  | 0.62                |                 |
|            |             |            | Female | 0.42 | 379 | 1.24 (0.71-2.16)      | 0.45                    | 0.91            | 1.87 (0.56-6.23)  | 0.85 (0.35-2.05)             | 2.22 (0.43-11.35)       | 1.11 (0.35-3.50)          | 0.63                  | 0.98                |                 |
| rs4809549  | CHRNA4      | 20         | Male   | 0.47 | 385 | 1.04 (0.74-1.46)      | 0.82                    | 0.99            | 1.47 (0.69-3.11)  | 0.78 (0.42-1.48)             | 1.07 (0.55-2.07)        | 1.06 (0.52-2.17)          | 0.66                  | 0.87                |                 |
|            |             |            | Female | 0.48 | 403 | 0.72 (0.50-1.04)      | 0.08                    | 0.42            | 0.78 (0.37-1.63)  | 0.66 (0.35-1.23)             | 0.98 (0.39-2.49)        | 0.62 (0.29-1.31)          | 0.87                  | 1.00                |                 |
| rs7281533  | CLIC6       | 21         | Male   | 0.21 | 386 | 1.06 (0.71-1.61)      | 0.77                    | 0.99            | 1.11 (0.44-2.80)  | 0.74 (0.33-1.67)             | 1.40 (0.68-2.88)        | 1.09 (0.45-2.63)          | 0.72                  | 0.91                |                 |
|            |             |            | Female | 0.23 | 403 | 0.85 (0.55-1.31)      | 0.46                    | 0.96            | 0.74 (0.28-1.98)  | 0.96 (0.46-2.01)             | 1.11 (0.40-3.06)        | 0.69 (0.30-1.61)          | 0.88                  | 1.00                |                 |
| rs2409531  | CLIC6       | 21         | Male   | 0.21 | 386 | 1.06 (0.70-1.60)      | 0.77                    | 0.98            | 1.11 (0.44-2.80)  | 0.74 (0.33-1.67)             | 1.44 (0.70-2.96)        | 1.03 (0.42-2.50)          | 0.69                  | 0.89                |                 |
|            |             |            | Female | 0.23 | 403 | 0.85 (0.55-1.31)      | 0.46                    | 0.96            | 0.74 (0.28-1.98)  | 0.96 (0.46-2.01)             | 1.11 (0.40-3.06)        | 0.69 (0.30-1.61)          | 0.88                  | 1.00                |                 |
| rs7281040  | CLIC6       | 21         | Male   | 0.21 | 385 | 1.13 (0.68-1.85)      | 0.64                    | 1.00            | 1.17 (0.49-4.38)  | 0.69 (0.26-1.80)             | 1.52 (0.62-3.73)        | 1.09 (0.36-3.28)          | 0.64                  | 0.89                |                 |
|            |             |            | Female | 0.23 | 403 | 0.93 (0.55-1.57)      | 0.79                    | 0.95            | 0.86 (0.28-2.66)  | 1.19 (0.50-2.80)             | 1.07 (0.30-3.87)        | 0.64 (0.22-1.85)          | 0.83                  | 1.00                |                 |
| rs2834578  | CLIC6       | 21         | Male   | 0.40 | 386 | 1.13 (0.68-1.87)      | 0.64                    | 1.00            | 1.57 (0.51-4.82)  | 1.70 (0.62-4.61)             | 1.19 (0.47-3.01)        | 0.48 (0.17-1.36)          | 0.31                  | 0.69                |                 |
|            |             |            | Female | 0.39 | 403 | 0.81 (0.49-1.36)      | 0.43                    | 0.96            | 1.35 (0.44-4.15)  | 0.68 (0.29-1.61)             | 0.84 (0.23-3.03)        | 0.67 (0.25-1.81)          | 0.77                  | 1.00                |                 |
| rs2236610  | CLIC6       | 21         | Male   | 0.17 | 381 | 1.05 (0.62-1.79)      | 0.86                    | 0.86            | 1.21 (0.39-3.76)  | 0.58 (0.20-1.64)             | 1.85 (0.72-4.76)        | 0.87 (0.25-3.01)          | 0.42                  | 0.82                |                 |
|            |             |            | Female | 0.17 | 391 | 0.77 (0.44-1.37)      | 0.37                    | 0.95            | 0.86 (0.25-2.91)  | 0.73 (0.28-1.93)             | 1.45 (0.40-5.25)        | 0.42 (0.11-1.60)          | 0.61                  | 0.99                |                 |
| rs2834586  | CLIC6       | 21         | Male   | 0.19 | 386 | 1.21 (0.73-2.00)      | 0.47                    | 0.99            | 1.67 (0.56-5.00)  | 0.68 (0.25-1.84)             | 1.64 (0.65-4.13)        | 1.19 (0.40-3.58)          | 0.55                  | 0.88                |                 |
|            |             |            | Female | 0.19 | 403 | 0.78 (0.45-1.36)      | 0.37                    | 0.95            | 0.71 (0.21-2.37)  | 0.85 (0.35-2.09)             | 1.33 (0.37-4.81)        | 0.44 (0.12-1.67)          | 0.68                  | 0.99                |                 |
| rs2834587  | CLIC6       | 21         | Male   | 0.35 | 386 | 0.90 (0.55-1.47)      | 0.67                    | 0.99            | 0.63 (0.21-1.92)  | 0.52 (0.21-1.29)             | 1.08 (0.43-2.70)        | 2.05 (0.69-6.09)          | 0.24                  | 0.61                |                 |
|            |             |            | Female | 0.35 | 403 | 1.15 (0.68-1.92)      | 0.60                    | 0.99            | 1.38 (0.50-3.82)  | 1.17 (0.48-2.89)             | 1.01 (0.27-3.79)        | 1.00 (0.37-2.71)          | 0.97                  | 1.00                |                 |
| rs2186287  | CLIC6       | 21         | Male   | 0.34 | 381 | 0.87 (0.53-1.43)      | 0.59                    | 1.00            | 0.66 (0.22-2.00)  | 0.47 (0.19-1.17)             | 1.03 (0.41-2.58)        | 2.09 (0.70-6.19)          | 0.19                  | 0.54                |                 |
|            |             |            | Female | 0.35 | 401 | 1.18 (0.70-1.98)      | 0.54                    | 0.98            | 1.41 (0.51-3.91)  | 1.26 (0.50-3.19)             | 1.01 (0.27-3.79)        | 1.00 (0.37-2.71)          | 0.96                  | 1.00                |                 |
| rs2834590  | CLIC6       | 21         | Male   | 0.16 | 386 | 0.89 (0.55-1.44)      | 0.63                    | 1.00            | 0.39 (0.14-1.51)  | 0.59 (0.23-1.51)             | 0.77 (0.30-1.93)        | 2.51 (1.03-6.10)          | 0.06                  | 0.25                |                 |
|            |             |            | Female | 0.16 | 403 | 1.56 (0.97-2.52)      | 0.07                    | 0.43            | 1.63 (0.60-4.42)  | 1.92 (0.88-4.23)             | 0.65 (0.13-3.31)        | 1.57 (0.64-3.89)          | 0.67                  | 0.99                |                 |
| rs2070367  | CLIC6       | 21         | Male   | 0.21 | 386 | 1.11 (0.67-1.84)      | 0.67                    | 0.99            | 1.25 (0.42-3.76)  | 0.56 (0.21-1.51)             | 1.91 (0.77-4.74)        | 1.12 (0.37-3.73)          | 0.34                  | 0.73                |                 |
|            |             |            | Female | 0.20 | 403 | 0.70 (0.40-1.21)      | 0.19                    | 0.75            | 0.65 (0.19-2.15)  | 0.61 (0.24-1.54)             | 1.42 (0.39-5.12)        | 0.51 (0.15-1.71)          | 0.68                  | 0.98                |                 |
| rs6517254  | CLIC6       | 21         | Male   | 0.38 | 386 | 0.80 (0.49-1.31)      | 0.38                    | 0.96            | 0.50 (0.16-1.49)  | 0.44 (0.18-1.10)             | 0.93 (0.36-2.39)        | 2.41 (0.77-7.51)          | 0.09                  | 0.31                |                 |
|            |             |            | Female | 0.38 | 403 | 1.13 (0.67-1.91)      | 0.64                    | 0.99            | 1.24 (0.45-3.45)  | 1.09 (0.43-2.76)             | 1.01 (0.27-3.79)        | 1.17 (0.43-3.20)          | 1.00                  | 1.00                |                 |
| rs3819041  | CLIC6       | 21         | Male   | 0.42 | 386 | 1.10 (0.78-1.53)      | 0.59                    | 1.00            | 1.61 (0.77-3.39)  | 1.70 (0.91-3.17)             | 0.81 (0.43-1.56)        | 0.59 (0.28-1.26)          | 0.09                  | 0.33                |                 |
|            |             |            | Female | 0.40 | 403 | 0.93 (0.65-1.32)      | 0.68                    | 0.99            | 0.89 (0.45-1.78)  | 0.89 (0.48-1.64)             | 1.37 (0.59-3.18)        | 0.78 (0.38-1.62)          | 0.79                  | 1.00                |                 |
| rs2834600  | CLIC6       | 21         | Male   | 0.13 | 386 | 0.89 (0.51-1.57)      | 0.69                    | 0.99            | 0.52 (0.13-2.01)  | 0.51 (0.17-1.54)             | 1.12 (0.41-3.07)        | 2.18 (0.69-6.87)          | 0.25                  | 0.62                |                 |
|            |             |            | Female | 0.14 | 403 | 2.29 (1.34-3.91)      | 2.86 × 10 <sup>-3</sup> | 0.03            | 2.71 (0.87-8.47)  | 2.74 (1.15-6.50)             | 0.73 (0.14-3.72)        | 2.76 (0.95-7.99)          | 0.46                  | 0.94                |                 |
| rs2834603  | CLIC6       | 21         | Male   | 0.08 | 386 | 1.17 (0.59-2.32)      | 0.66                    | 1.00            | 0.57 (0.12-2.84)  | 2.22 (0.54-9.17)             | 1.05 (0.30-3.66)        | 1.42 (0.34-5.87)          | 0.63                  | 0.93                |                 |
|            |             |            | Female | 0.05 | 403 | 0.84 (0.35-1.98)      | 0.68                    | 0.96            | 0.80 (0.16-3.95)  | 0.30 (0.04-2.48)             | 2.99 (0.50-17.91)       | 0.92 (0.18-4.77)          | 0.42                  | 0.92                |                 |
| rs2834604  | CLIC6       | 21         | Male   | 0.33 | 386 | 0.79 (0.54-1.15)      | 0.22                    | 0.84            | 0.79 (0.29-2.15)  | 0.52 (0.24-1.11)             | 1.11 (0.60-2.06)        | 0.73 (0.32-1.65)          | 0.50                  | 0.89                |                 |
|            |             |            | Female | 0.37 | 403 | 0.96 (0.66-1.41)      | 0.85                    | 0.85            | 0.98 (0.44-2.15)  | 0.95 (0.48-1.91)             | 0.90 (0.36-2.29)        | 1.00 (0.49-2.02)          | 1.00                  | 1.00                |                 |
| rs2834605  | CLIC6       | 21         | Male   | 0.12 | 386 | 0.92 (0.53-1.59)      | 0.77                    | 0.99            | 0.38 (0.08-1.81)  | 0.65 (0.23-1.85)             | 1.02 (0.41-2.56)        | 2.50 (0.79-7.95)          | 0.20                  | 0.54                |                 |
|            |             |            | Female | 0.14 | 403 | 1.86 (1.10-3.13)      | 0.02                    | 0.18            | 2.07 (0.68-6.34)  | 2.35 (0.99-5.54)             | 1.02 (0.14-3.69)        | 1.90 (0.72-5.04)          | 0.62                  | 0.99                |                 |
| rs11088294 | CLIC6       | 21         | Male   | 0.24 | 381 | 0.71 (0.42-1.19)      | 0.19                    | 0.81            | 0.99 (0.32-3.05)  | 0.75 (0.30-1.86)             | 0.74 (0.27-2.03)        | 0.46 (0.15-1.42)          | 0.81                  | 0.81                |                 |
|            |             |            | Female | 0.27 | 402 | 0.81 (0.49-1.35)      | 0.42                    | 0.97            | 0.54 (0.15-1.88)  | 0.73 (0.31-1.71)             | 1.14 (0.32-4.12)        | 1.12 (0.41-3.00)          | 0.73                  | 0.99                |                 |
| rs1107470  | CLIC6       | 21         | Male   | 0.21 | 386 | 1.08 (0.65-1.77)      | 0.78                    | 0.95            | 0.56 (0.18-1.80)  | 0.65 (0.24-1.71)             | 1.22 (0.49-3.03)        | 3.13 (1.06-9.24)          | 0.11                  | 0.35                |                 |
|            |             |            | Female | 0.19 | 402 | 1.64 (0.99-2.75)      | 0.06                    | 0.39            | 1.10 (0.37-3.26)  | 2.10 (0.89-4.94)             | 0.73 (0.18-3.01)        | 2.65 (0.96-7.31)          | 0.38                  | 0.89                |                 |
| rs4485648  | COMT        | 22         | Male   | 0.20 | 386 | 0.75 (0.48-1.17)      | 0.20                    | 0.91            | 0.55 (0.17-1.78)  | 1.23 (0.57-2.63)             | 0.57 (0.24-1.39)        | 0.65 (0.26-1.64)          | 0.52                  | 0.97                |                 |
|            |             |            | Female | 0.18 | 403 | 0.71 (0.42-1.19)      | 0.18                    | 0.85            | 0.79 (0.27-2.27)  | 0.46 (0.18-1.18)             | 1.42 (0.42-4.81)        | 0.74 (0.26-2.09)          | 0.55                  | 0.94                |                 |
| rs8140265  | COMT        | 22         | Male   | 0.31 | 386 | 0.93 (0.64-1.36)      | 0.71                    | 1.00            | 0.55 (0.22-1.39)  | 1.13 (0.52-2.49)             | 0.88 (0.44-1.74)        | 1.23 (0.59-2.56)          | 0.54                  | 0.96                |                 |
|            |             |            | Female | 0.27 | 402 | 1.57 (1.07-2.32)      | 0.02                    | 0.27            | 1.30 (0.61-2.39)  | 2.83 (1.34-5.98)             | 2.53 (0.96-6.65)        | 0.76 (0.35-1.67)          | 0.07                  | 0.34                |                 |
| rs8137828  | COMT        | 22         | Male   | 0.44 | 385 | 1.06 (0.75-1.50)      | 0.73                    | 1.00            | 1.54 (0.71-3.36)  | 0.61 (0.31-1.19)             | 1.45 (0.76-2.78)        | 1.00 (0.48-2.07)          | 0.20                  | 0.70                |                 |
|            |             |            | Female | 0.50 | 403 | 0.81 (0.57-1.16)      | 0.25                    | 0.85            | 1.04 (0.51-2.13)  | 0.65 (0.36-1.15)             | 0.32 (0.11-0.95)        | 1.64 (0.74-3.64)          | 0.06                  | 0.32                |                 |
| rs2871047  | COMT        | 22         | Male   | 0.05 | 384 | 1.79 (0.84-3.81)      | 0.14                    | 0.85            | 5.29 (0.95-29.36) | 1.32 (0.41-4.28)             | 1.75 (0.30-10.22)       | 1.32 (0.25-7.04)          | 0.60                  | 0.95                |                 |
|            |             |            | Female | 0.06 | 400 | 1.34 (0.62-2.87)      | 0.46                    | 0.95            | 1.03 (0.20-5.20)  | 2.69 (0.77-9.33)             | 0.74 (0.08-6.63)        | 0.90 (0.17-4.63)          | 0.61                  | 0.92                |                 |
| rs6518592  | COMT        | 22         | Male   | 0.40 | 386 | 1.04 (0.62-1.74)      | 0.89                    | 1.00            | 0.83 (0.27-2.57)  | 0.68 (0.26-1.75)             | 1.92 (0.69-5.35)        | 1.03 (0.36-2.96)          | 0.50                  | 0.96                |                 |
|            |             |            | Female | 0.45 | 403 | 0.59 (0.35-0.99)      | 0.05                    | 0.45            | 1.10 (0.35-3.41)  | 0.37 (0.15-0.92)             | 0.24 (0.06-0.90)        | 1.10 (0.37-3.23)          | 0.15                  | 0.56                |                 |
| rs737865   | COMT        | 22         | Male   | 0.31 | 386 | 0.93 (0.57-1.51)      | 0.76                    | 1.00            | 0.62 (0.21-1.86)  | 1.05 (0.43-2.57)             | 0.72 (0.30-1.76)        | 1.59 (0.55-4.57)          | 0.59                  | 0.96                |                 |
|            |             |            | Female | 0.28 | 403 | 1.83 (1.10-3.05)      | 0.02                    | 0.24            | 1.36 (0.49-3.79)  | 3.24 (1.36-7.75)             | 4.62 (0.92-23.09)       | 0.72 (0.26-1.93)          | 0.07                  | 0.34                |                 |
| rs1544325  | COMT        | 22         | Male   | 0.40 | 386 | 1.02 (0.72-1.45)      | 0.89                    | 1.00            | 1.17 (0.56-2.47)  | 0.70 (0.35-1.40)             | 1.19 (0.63-2.24)        | 1.14 (0.56-2.33)          | 0.66                  | 0.95                |                 |
|            |             |            | Female | 0.46 | 402 | 0.78 (0.55-1.12)      | 0.18                    | 0.85            | 1.04 (0.50-2.15)  | 0.60 (0.33-1.09)             | 0.24 (0.07-0.80)        | 1.55 (0.75-3.20)          | 0.03                  | 0.17                |                 |
| rs174675   | COMT        | 22         | Male   | 0.28 | 385 | 1.08 (0.66-1.75)      | 0.77                    | 1.00            | 1.40 (0.47-4.17)  | 1.68 (0.67-4.22)             | 0.91 (0.37-2.25)        | 0.60 (0.21-1.73)          | 0.68                  | 0.95                |                 |
|            |             |            | Female | 0.27 | 403 | 0.89 (0.54-1.48)      | 0.66                    | 0.92            | 0.63 (0.21-1.84)  | 0.67 (0.28-1.58)             | 2.11 (0.56-7.88)        | 1.09 (0.40-2.93)          | 0.44                  | 0.92                |                 |

| SNP        | Gene Region | Chromosome | Gender | MAF                    | N   | Marginal Effect       |                         |            | Treatment Stratified Effects |                  |                   |                   |                         |                 |                 |                 |            |            |    |    |    |    |    |  |
|------------|-------------|------------|--------|------------------------|-----|-----------------------|-------------------------|------------|------------------------------|------------------|-------------------|-------------------|-------------------------|-----------------|-----------------|-----------------|------------|------------|----|----|----|----|----|--|
|            |             |            |        |                        |     | Likelihood ratio test |                         |            | Placebo                      | Bupropion        | Patch             | Spray             | Test of Interaction     |                 |                 |                 |            |            |    |    |    |    |    |  |
|            |             |            |        |                        |     | SNP OR (95% CI)       | Observed P              | Adjusted P |                              |                  |                   |                   | SNP OR (95% CI)         | SNP OR (95% CI) | SNP OR (95% CI) | SNP OR (95% CI) | Observed P | Adjusted P |    |    |    |    |    |  |
| rs2276005  | MAPKI       | 22         | Male   | 0.04                   | NA  | NA                    | NA                      | NA         | NA                           | NA               | NA                | NA                | NA                      | NA              | NA              | NA              | NA         | NA         | NA | NA | NA | NA |    |  |
|            |             |            | Female | 0.04                   | NA  | NA                    | NA                      | NA         | NA                           | NA               | NA                | NA                | NA                      | NA              | NA              | NA              | NA         | NA         | NA | NA | NA | NA |    |  |
| rs13515    | MAPKI       | 22         | Male   | 0.21                   | 384 | 0.95 (0.61-1.46)      | 0.81                    | 0.99       | 0.77 (0.31-1.92)             | 1.66 (0.75-3.66) | 1.38 (0.64-2.99)  | 0.20 (0.05-0.77)  | 0.02                    | 0.08            |                 |                 |            |            |    |    |    |    |    |  |
|            |             |            | Female | 0.18                   | 403 | 0.75 (0.46-1.21)      | 0.23                    | 0.64       | 0.42 (0.12-1.43)             | 1.42 (0.68-3.00) | 0.17 (0.02-1.29)  | 0.82 (0.33-2.02)  | 0.07                    | 0.25            |                 |                 |            |            |    |    |    |    |    |  |
| rs1063311  | MAPKI       | 22         | Male   | 0.46                   | 383 | 0.92 (0.64-1.31)      | 0.64                    | 0.64       | 1.24 (0.58-2.68)             | 0.80 (0.42-1.53) | 1.26 (0.65-2.44)  | 0.49 (0.21-1.14)  | 0.27                    | 0.45            |                 |                 |            |            |    |    |    |    |    |  |
|            |             |            | Female | 0.43                   | 399 | 0.72 (0.51-1.04)      | 0.08                    | 0.31       | 0.51 (0.24-1.07)             | 0.98 (0.54-1.77) | 0.80 (0.30-2.14)  | 0.64 (0.32-1.31)  | 0.57                    | 0.94            |                 |                 |            |            |    |    |    |    |    |  |
| rs5755074  | MAPKI       | 22         | Male   | 0.04                   | NA  | NA                    | NA                      | NA         | NA                           | NA               | NA                | NA                | NA                      | NA              | NA              | NA              | NA         | NA         | NA | NA | NA | NA |    |  |
|            |             |            | Female | 0.04                   | NA  | NA                    | NA                      | NA         | NA                           | NA               | NA                | NA                | NA                      | NA              | NA              | NA              | NA         | NA         | NA | NA | NA | NA | NA |  |
| rs2266966  | MAPKI       | 22         | Male   | 0.46                   | 386 | 0.94 (0.66-1.34)      | 0.74                    | 1.00       | 1.24 (0.58-2.68)             | 0.87 (0.46-1.64) | 1.26 (0.66-2.43)  | 0.49 (0.21-1.14)  | 0.29                    | 0.44            |                 |                 |            |            |    |    |    |    |    |  |
|            |             |            | Female | 0.43                   | 402 | 0.73 (0.51-1.04)      | 0.08                    | 0.33       | 0.54 (0.26-1.12)             | 0.96 (0.53-1.73) | 0.80 (0.30-2.14)  | 0.64 (0.31-1.31)  | 0.64                    | 0.93            |                 |                 |            |            |    |    |    |    |    |  |
| rs17759598 | MAPKI       | 22         | Male   | 0.17                   | 385 | 0.87 (0.55-1.39)      | 0.57                    | 0.98       | 0.38 (0.11-1.33)             | 1.68 (0.75-3.76) | 1.33 (0.59-3.01)  | 0.27 (0.07-1.02)  | 0.03                    | 0.09            |                 |                 |            |            |    |    |    |    |    |  |
|            |             |            | Female | 0.14                   | 403 | 0.44 (0.23-0.83)      | 5.60 × 10 <sup>-3</sup> | 1.00       | 0.35 (0.08-1.53)             | 0.72 (0.28-1.86) | 0.19 (0.02-1.52)  | 0.39 (0.11-1.37)  | 0.60                    | 0.96            |                 |                 |            |            |    |    |    |    |    |  |
| rs2298432  | MAPKI       | 22         | Male   | 0.36                   | 386 | 0.95 (0.67-1.35)      | 0.79                    | 1.00       | 0.33 (0.12-0.91)             | 0.94 (0.50-1.77) | 0.86 (0.47-1.59)  | 2.55 (1.13-5.76)  | 0.01                    | 0.05            |                 |                 |            |            |    |    |    |    |    |  |
|            |             |            | Female | 0.35                   | 402 | 1.22 (0.85-1.75)      | 0.28                    | 0.64       | 1.59 (0.73-3.44)             | 1.22 (0.69-2.18) | 1.14 (0.45-2.89)  | 0.99 (0.47-2.09)  | 0.86                    | 0.97            |                 |                 |            |            |    |    |    |    |    |  |
| rs4821263  | MAPKI       | 22         | Male   | 0.04                   | NA  | NA                    | NA                      | NA         | NA                           | NA               | NA                | NA                | NA                      | NA              | NA              | NA              | NA         | NA         | NA | NA | NA | NA | NA |  |
|            |             |            | Female | 0.04                   | NA  | NA                    | NA                      | NA         | NA                           | NA               | NA                | NA                | NA                      | NA              | NA              | NA              | NA         | NA         | NA | NA | NA | NA | NA |  |
| rs743409   | MAPKI       | 22         | Male   | 0.44                   | 385 | 1.12 (0.79-1.59)      | 0.53                    | 0.97       | 0.37 (0.15-0.94)             | 1.22 (0.64-2.35) | 0.97 (0.52-1.80)  | 2.95 (1.33-6.54)  | 5.47 × 10 <sup>-3</sup> | 0.03            |                 |                 |            |            |    |    |    |    |    |  |
|            |             |            | Female | 0.47                   | 403 | 1.19 (0.85-1.66)      | 0.32                    | 0.63       | 2.10 (1.02-4.33)             | 0.81 (0.46-1.42) | 1.57 (0.63-3.96)  | 1.05 (0.55-2.00)  | 0.18                    | 0.47            |                 |                 |            |            |    |    |    |    |    |  |
| rs2283791  | MAPKI       | 22         | Male   | 0.46                   | 382 | 0.94 (0.66-1.34)      | 0.74                    | 1.00       | 1.24 (0.58-2.65)             | 0.87 (0.46-1.64) | 1.26 (0.65-2.45)  | 0.49 (0.21-1.13)  | 0.28                    | 0.44            |                 |                 |            |            |    |    |    |    |    |  |
|            |             |            | Female | 0.43                   | 403 | 0.74 (0.52-1.06)      | 0.10                    | 0.37       | 0.53 (0.25-1.12)             | 1.00 (0.55-1.81) | 0.80 (0.30-2.14)  | 0.64 (0.31-1.31)  | 0.57                    | 0.95            |                 |                 |            |            |    |    |    |    |    |  |
| rs9607272  | MAPKI       | 22         | Male   | 0.25                   | 386 | 1.00 (0.61-1.62)      | 0.99                    | 0.99       | 2.72 (0.89-8.36)             | 0.46 (0.18-1.21) | 0.87 (0.36-2.12)  | 1.29 (0.46-3.65)  | 0.11                    | 0.22            |                 |                 |            |            |    |    |    |    |    |  |
|            |             |            | Female | 0.24                   | 403 | 1.17 (0.70-1.94)      | 0.55                    | 0.61       | 0.89 (0.32-2.47)             | 1.08 (0.46-2.55) | 2.29 (0.63-8.34)  | 1.12 (0.40-3.10)  | 0.72                    | 0.94            |                 |                 |            |            |    |    |    |    |    |  |
| rs11704205 | MAPKI       | 22         | Male   | 0.45                   | 386 | 1.07 (0.75-1.51)      | 0.72                    | 1.00       | 0.35 (0.14-0.90)             | 1.14 (0.60-2.18) | 0.97 (0.52-1.81)  | 2.79 (1.23-6.33)  | 7.26 × 10 <sup>-3</sup> | 0.03            |                 |                 |            |            |    |    |    |    |    |  |
|            |             |            | Female | 0.47                   | 403 | 1.20 (0.86-1.68)      | 0.29                    | 0.61       | 2.29 (1.09-4.80)             | 0.79 (0.45-1.40) | 1.57 (0.63-3.96)  | 1.05 (0.45-2.00)  | 0.13                    | 0.35            |                 |                 |            |            |    |    |    |    |    |  |
| rs5999550  | MAPKI       | 22         | Male   | 0.45                   | 386 | 1.07 (0.75-1.51)      | 0.72                    | 1.00       | 0.35 (0.14-0.90)             | 1.14 (0.60-2.18) | 0.97 (0.52-1.81)  | 2.79 (1.23-6.33)  | 7.26 × 10 <sup>-3</sup> | 0.03            |                 |                 |            |            |    |    |    |    |    |  |
|            |             |            | Female | 0.47                   | 403 | 1.20 (0.86-1.68)      | 0.29                    | 0.61       | 2.29 (1.09-4.80)             | 0.79 (0.45-1.40) | 1.57 (0.63-3.96)  | 1.05 (0.45-2.00)  | 0.13                    | 0.35            |                 |                 |            |            |    |    |    |    |    |  |
| rs2298434  | MAPKI       | 22         | Male   | 0.04                   | NA  | NA                    | NA                      | NA         | NA                           | NA               | NA                | NA                | NA                      | NA              | NA              | NA              | NA         | NA         | NA | NA | NA | NA | NA |  |
|            |             |            | Female | 0.04                   | NA  | NA                    | NA                      | NA         | NA                           | NA               | NA                | NA                | NA                      | NA              | NA              | NA              | NA         | NA         | NA | NA | NA | NA | NA |  |
| rs9610355  | MAPKI       | 22         | Male   | 0.04                   | NA  | NA                    | NA                      | NA         | NA                           | NA               | NA                | NA                | NA                      | NA              | NA              | NA              | NA         | NA         | NA | NA | NA | NA | NA |  |
|            |             |            | Female | 0.04                   | NA  | NA                    | NA                      | NA         | NA                           | NA               | NA                | NA                | NA                      | NA              | NA              | NA              | NA         | NA         | NA | NA | NA | NA | NA |  |
| rs3788332  | MAPKI       | 22         | Male   | 0.45                   | 386 | 1.07 (0.75-1.51)      | 0.72                    | 1.00       | 0.35 (0.14-0.90)             | 1.14 (0.60-2.18) | 0.97 (0.52-1.81)  | 2.79 (1.23-6.33)  | 7.26 × 10 <sup>-3</sup> | 0.03            |                 |                 |            |            |    |    |    |    |    |  |
|            |             |            | Female | 0.47                   | 401 | 1.20 (0.85-1.68)      | 0.30                    | 0.61       | 2.38 (1.12-5.02)             | 0.77 (0.43-1.37) | 1.57 (0.63-3.92)  | 1.05 (0.55-2.00)  | 0.10                    | 0.29            |                 |                 |            |            |    |    |    |    |    |  |
| rs5999704  | MAPKI       | 22         | Male   | 0.00                   | NA  | NA                    | NA                      | NA         | NA                           | NA               | NA                | NA                | NA                      | NA              | NA              | NA              | NA         | NA         | NA | NA | NA | NA | NA |  |
|            |             |            | Female | 1.24 × 10 <sup>3</sup> | NA  | NA                    | NA                      | NA         | NA                           | NA               | NA                | NA                | NA                      | NA              | NA              | NA              | NA         | NA         | NA | NA | NA | NA | NA |  |
| rs1892848  | MAPKI       | 22         | Male   | 0.45                   | 386 | 1.07 (0.75-1.51)      | 0.72                    | 1.00       | 0.35 (0.14-0.90)             | 1.14 (0.60-2.18) | 0.97 (0.52-1.81)  | 2.79 (1.23-6.33)  | 7.26 × 10 <sup>-3</sup> | 0.03            |                 |                 |            |            |    |    |    |    |    |  |
|            |             |            | Female | 0.47                   | 403 | 1.20 (0.86-1.68)      | 0.29                    | 0.61       | 2.29 (1.09-4.80)             | 0.79 (0.45-1.40) | 1.57 (0.63-3.96)  | 1.05 (0.45-2.00)  | 0.13                    | 0.35            |                 |                 |            |            |    |    |    |    |    |  |
| rs9610375  | MAPKI       | 22         | Male   | 0.49                   | 377 | 0.74 (0.42-1.30)      | 0.30                    | 0.83       | 1.17 (0.29-4.71)             | 1.14 (0.39-3.34) | 0.66 (0.25-1.79)  | 0.32 (0.10-1.05)  | 0.39                    | 0.45            |                 |                 |            |            |    |    |    |    |    |  |
|            |             |            | Female | 0.48                   | 397 | 0.55 (0.32-0.93)      | 0.03                    | 0.14       | 0.41 (0.14-1.19)             | 0.62 (0.26-1.52) | 0.59 (0.15-2.35)  | 0.58 (0.21-1.64)  | 0.94                    | 0.94            |                 |                 |            |            |    |    |    |    |    |  |
| rs5755694  | MAPKI       | 22         | Male   | 0.43                   | 386 | 1.05 (0.62-1.76)      | 0.86                    | 0.98       | 0.31 (0.10-0.93)             | 1.73 (0.61-4.93) | 0.78 (0.30-2.00)  | 3.30 (0.87-12.45) | 0.02                    | 0.08            |                 |                 |            |            |    |    |    |    |    |  |
|            |             |            | Female | 0.45                   | 403 | 1.19 (0.69-2.06)      | 0.52                    | 0.80       | 4.91 (1.06-22.80)            | 0.46 (0.19-1.10) | 2.09 (0.41-10.60) | 1.30 (0.45-3.79)  | 0.02                    | 0.10            |                 |                 |            |            |    |    |    |    |    |  |
| rs1836867  | MAPKI       | 22         | Male   | 0.43                   | 385 | 1.05 (0.63-1.77)      | 0.85                    | 0.98       | 0.31 (0.10-0.93)             | 1.73 (0.61-4.93) | 0.78 (0.30-2.00)  | 3.37 (0.89-12.73) | 0.02                    | 0.08            |                 |                 |            |            |    |    |    |    |    |  |
|            |             |            | Female | 0.45                   | 402 | 1.21 (0.70-2.09)      | 0.49                    | 0.78       | 4.81 (1.03-22.41)            | 0.48 (0.20-1.16) | 2.09 (0.41-10.58) | 1.30 (0.45-3.79)  | 0.03                    | 0.13            |                 |                 |            |            |    |    |    |    |    |  |
| rs2876981  | MAPKI       | 22         | Male   | 0.42                   | 386 | 0.74 (0.44-1.24)      | 0.25                    | 0.78       | 0.71 (0.23-2.20)             | 1.03 (0.41-2.60) | 0.88 (0.34-2.26)  | 0.36 (0.12-1.09)  | 0.52                    | 0.52            |                 |                 |            |            |    |    |    |    |    |  |
|            |             |            | Female | 0.39                   | 403 | 0.60 (0.36-0.99)      | 0.05                    | 0.22       | 0.54 (0.19-1.50)             | 0.67 (0.29-1.58) | 1.17 (0.31-4.39)  | 0.37 (0.13-1.03)  | 0.58                    | 0.95            |                 |                 |            |            |    |    |    |    |    |  |
| rs9610470  | MAPKI       | 22         | Male   | 0.26                   | 386 | 0.92 (0.57-1.50)      | 0.75                    | 1.00       | 2.55 (0.83-7.83)             | 0.41 (0.16-1.08) | 0.83 (0.34-2.02)  | 1.20 (0.42-3.40)  | 0.09                    | 0.20            |                 |                 |            |            |    |    |    |    |    |  |
|            |             |            | Female | 0.25                   | 403 | 1.10 (0.66-1.83)      | 0.71                    | 0.71       | 0.75 (0.27-2.08)             | 1.08 (0.46-2.55) | 2.03 (0.67-7.38)  | 1.12 (0.40-3.10)  | 0.70                    | 0.93            |                 |                 |            |            |    |    |    |    |    |  |
| rs4821401  | MAPKI       | 22         | Male   | 0.04                   | NA  | NA                    | NA                      | NA         | NA                           | NA               | NA                | NA                | NA                      | NA              | NA              | NA              | NA         | NA         | NA | NA | NA | NA | NA |  |
|            |             |            | Female | 0.04                   | NA  | NA                    | NA                      | NA         | NA                           | NA               | NA                | NA                | NA                      | NA              | NA              | NA              | NA         | NA         | NA | NA | NA | NA | NA |  |
| rs5755745  | MAPKI       | 22         | Male   | 0.04                   | NA  | NA                    | NA                      | NA         | NA                           | NA               | NA                | NA                | NA                      | NA              | NA              | NA              | NA         | NA         | NA | NA | NA | NA | NA |  |
|            |             |            | Female | 0.04                   | NA  | NA                    | NA                      | NA         | NA                           | NA               | NA                | NA                | NA                      | NA              | NA              | NA              | NA         | NA         | NA | NA | NA | NA | NA |  |
| rs5999891  | MAPKI       | 22         | Male   | 0.00                   | NA  | NA                    | NA                      | NA         | NA                           | NA               | NA                | NA                | NA                      | NA              | NA              | NA              | NA         | NA         | NA | NA | NA | NA | NA |  |
|            |             |            | Female | 1.24 × 10 <sup>3</sup> | NA  | NA                    | NA                      | NA         | NA                           | NA               | NA                | NA                | NA                      | NA              | NA              | NA              | NA         | NA         | NA | NA | NA | NA | NA |  |
| rs9612225  | GNAZ        | 22         | Male   | 0.26                   | 383 | 0.59 (0.35-0.97)      | 0.04                    | 0.30       | 0.57 (0.18-1.84)             | 0.49 (0.19-1.27) | 0.55 (0.22-1.40)  | 0.82 (0.28-2.36)  | 0.91                    | 0.95            |                 |                 |            |            |    |    |    |    |    |  |
|            |             |            | Female | 0.25                   | 401 | 1.17 (0.71-1.93)      | 0.55                    | 0.99       | 1.23 (0.44-3.41)             | 0.95 (0.40-2.26) | 3.56 (0.87-14.66) | 0.79 (0.29-2.12)  | 0.32                    | 0.87            |                 |                 |            |            |    |    |    |    |    |  |
| rs13054331 | GNAZ        | 22         | Male   | 0.2                    |     |                       |                         |            |                              |                  |                   |                   |                         |                 |                 |                 |            |            |    |    |    |    |    |  |

| SNP        | Gene Region | Chromosome | Gender | MAF  | N   | Marginal Effect       |            |            | Treatment Stratified Effects |                   |                   |                   | Test of Interaction     |                 |            |            |
|------------|-------------|------------|--------|------|-----|-----------------------|------------|------------|------------------------------|-------------------|-------------------|-------------------|-------------------------|-----------------|------------|------------|
|            |             |            |        |      |     | Likelihood ratio test |            |            | SNP OR (95% CI)              | SNP OR (95% CI)   | SNP OR (95% CI)   | SNP OR (95% CI)   | SNP OR (95% CI)         | SNP OR (95% CI) | Observed P | Adjusted P |
|            |             |            |        |      |     | SNP OR (95% CI)       | Observed P | Adjusted P |                              |                   |                   |                   |                         |                 |            |            |
| rs2076370  | PRKCABP     | 22         | Female | 0.33 | 403 | 1.09 (0.66-1.81)      | 0.73       | 0.78       | 2.24 (0.77-6.52)             | 1.26 (0.53-2.96)  | 0.84 (0.23-3.02)  | 0.55 (0.20-1.50)  | 0.27                    | 0.64            |            |            |
|            |             |            | Male   | 0.39 | 380 | 1.03 (0.62-1.71)      | 0.91       | 1.00       | 0.95 (0.32-2.86)             | 0.88 (0.34-2.30)  | 2.26 (0.81-6.31)  | 0.53 (0.19-1.52)  | 0.25                    | 0.48            |            |            |
| rs760975   | PRKCABP     | 22         | Female | 0.38 | 397 | 1.21 (0.72-2.05)      | 0.47       | 0.74       | 2.73 (0.73-10.19)            | 0.77 (0.33-1.80)  | 0.81 (0.23-2.93)  | 1.71 (0.59-5.00)  | 0.32                    | 0.71            |            |            |
|            |             |            | Male   | 0.38 | 381 | 0.89 (0.54-1.47)      | 0.65       | 0.98       | 0.83 (0.27-2.56)             | 0.92 (0.35-2.39)  | 1.76 (0.66-4.71)  | 0.38 (0.13-1.15)  | 0.23                    | 0.46            |            |            |
| rs7289911  | PRKCABP     | 22         | Female | 0.39 | 402 | 1.27 (0.75-2.14)      | 0.37       | 0.77       | 2.35 (0.63-8.82)             | 0.75 (0.32-1.75)  | 1.05 (0.28-3.96)  | 1.96 (0.68-5.68)  | 0.37                    | 0.78            |            |            |
|            |             |            | Male   | 0.02 | NA  | NA                    | NA         | NA         | NA                           | NA                | NA                | NA                | NA                      | NA              |            |            |
| rs2012859  | PRKCABP     | 22         | Female | 0.03 | NA  | NA                    | NA         | NA         | NA                           | NA                | NA                | NA                | NA                      | NA              |            |            |
|            |             |            | Male   | 0.30 | 384 | 1.28 (0.79-2.08)      | 0.32       | 0.87       | 1.74 (0.57-5.33)             | 1.39 (0.56-3.45)  | 1.22 (0.50-3.00)  | 0.93 (0.33-2.62)  | 0.87                    | 0.87            |            |            |
| rs2076371  | PRKCABP     | 22         | Female | 0.29 | 403 | 0.58 (0.35-0.97)      | 0.03       | 0.22       | 0.31 (0.10-0.95)             | 0.66 (0.28-1.54)  | 0.87 (0.24-3.11)  | 0.67 (0.25-1.80)  | 0.62                    | 0.93            |            |            |
|            |             |            | Male   | 0.28 | 385 | 0.97 (0.65-1.43)      | 0.87       | 1.00       | 0.60 (0.23-1.58)             | 0.96 (0.48-1.92)  | 1.98 (0.94-4.16)  | 0.58 (0.23-1.45)  | 0.12                    | 0.32            |            |            |
| rs1004764  | PRKCABP     | 22         | Female | 0.28 | 403 | 1.41 (0.94-2.11)      | 0.10       | 0.44       | 1.88 (0.85-4.17)             | 0.97 (0.48-1.97)  | 1.25 (0.47-3.33)  | 1.92 (0.83-4.41)  | 0.53                    | 0.92            |            |            |
|            |             |            | Male   | 0.39 | 386 | 1.00 (0.60-1.64)      | 0.99       | 0.99       | 0.92 (0.30-2.75)             | 0.86 (0.33-2.23)  | 2.51 (0.90-6.97)  | 0.43 (0.15-1.25)  | 0.11                    | 0.30            |            |            |
| rs2076372  | PRKCABP     | 22         | Female | 0.38 | 402 | 1.32 (0.78-2.23)      | 0.30       | 0.69       | 2.41 (0.64-9.04)             | 0.81 (0.35-1.88)  | 1.12 (0.30-4.20)  | 1.97 (0.68-5.68)  | 0.43                    | 0.84            |            |            |
|            |             |            | Male   | 0.28 | 386 | 1.28 (0.79-2.09)      | 0.31       | 0.88       | 1.90 (0.62-5.80)             | 1.87 (0.75-4.64)  | 1.06 (0.44-2.59)  | 0.72 (0.25-2.06)  | 0.47                    | 0.69            |            |            |
| rs18135665 | PRKCABP     | 22         | Female | 0.25 | 401 | 0.53 (0.31-0.89)      | 0.02       | 0.11       | 0.13 (0.03-0.60)             | 0.98 (0.42-2.31)  | 0.29 (0.06-1.47)  | 0.73 (0.27-1.99)  | 0.06                    | 0.20            |            |            |
|            |             |            | Male   | 0.20 | 354 | 0.95 (0.56-1.62)      | 0.86       | 1.00       | 0.71 (0.20-2.58)             | 0.73 (0.26-2.03)  | 0.81 (0.31-2.09)  | 2.07 (0.68-6.31)  | 0.48                    | 0.70            |            |            |
| rs5756908  | PRKCABP     | 22         | Female | 0.21 | 379 | 1.38 (0.82-2.32)      | 0.23       | 0.68       | 2.18 (0.77-6.13)             | 1.48 (0.62-3.54)  | 1.55 (0.40-5.91)  | 0.69 (0.22-2.15)  | 0.51                    | 0.92            |            |            |
|            |             |            | Male   | 0.50 | 386 | 1.14 (0.65-2.03)      | 0.64       | 0.99       | 2.39 (0.49-11.55)            | 1.38 (0.50-3.79)  | 0.63 (0.22-1.77)  | 1.11 (0.32-3.88)  | 0.51                    | 0.69            |            |            |
| rs2267366  | PRKCABP     | 22         | Female | 0.48 | 403 | 0.80 (0.46-1.39)      | 0.42       | 0.81       | 0.84 (0.28-2.50)             | 1.16 (0.42-3.24)  | 0.74 (0.19-2.81)  | 0.50 (0.17-1.46)  | 0.73                    | 0.96            |            |            |
|            |             |            | Male   | 0.13 | 386 | 1.03 (0.62-1.71)      | 0.92       | 0.99       | 0.61 (0.16-2.28)             | 0.53 (0.20-1.41)  | 0.73 (0.25-2.12)  | 5.32 (1.80-15.74) | 6.33 × 10 <sup>-3</sup> | 0.03            |            |            |
| rs5905613  | MAOA        | X          | Female | 0.16 | 403 | 0.70 (0.42-1.17)      | 0.16       | 0.61       | 0.86 (0.33-2.29)             | 0.76 (0.34-1.70)  | 0.47 (0.07-3.33)  | 0.56 (0.19-1.63)  | 0.90                    | 0.90            |            |            |
|            |             |            | Male   | 0.30 | 386 | 1.29 (0.77-2.17)      | 0.33       | 0.95       | 1.09 (0.34-3.55)             | 1.09 (0.41-2.92)  | 1.24 (0.47-3.27)  | 1.93 (0.67-5.58)  | 0.86                    | 1.00            |            |            |
| rs4824657  | MAOA        | X          | Female | 0.27 | 403 | 0.87 (0.58-1.30)      | 0.49       | 1.00       | 0.67 (0.28-1.60)             | 0.81 (0.40-1.64)  | 0.61 (0.20-1.87)  | 1.39 (0.67-2.92)  | 0.50                    | 0.92            |            |            |
|            |             |            | Male   | 0.30 | 370 | 1.21 (0.71-2.07)      | 0.48       | 0.99       | 0.83 (0.23-2.94)             | 1.03 (0.46-2.93)  | 1.25 (0.47-3.30)  | 1.86 (0.64-5.35)  | 0.78                    | 0.98            |            |            |
| rs3788862  | MAOA        | X          | Female | 0.27 | 387 | 0.91 (0.61-1.36)      | 0.63       | 1.00       | 0.68 (0.29-1.61)             | 0.89 (0.45-1.79)  | 0.49 (0.14-1.73)  | 1.60 (0.74-3.43)  | 0.32                    | 0.86            |            |            |
|            |             |            | Male   | 0.30 | 385 | 1.27 (0.76-2.14)      | 0.36       | 0.97       | 1.07 (0.33-3.50)             | 1.09 (0.41-2.92)  | 1.24 (0.47-3.27)  | 1.83 (0.64-5.26)  | 0.89                    | 1.00            |            |            |
| rs5906883  | MAOA        | X          | Female | 0.27 | 403 | 0.88 (0.59-1.32)      | 0.55       | 1.00       | 0.66 (0.27-1.56)             | 0.79 (0.39-1.59)  | 0.58 (0.19-1.79)  | 1.65 (0.77-3.53)  | 0.29                    | 0.85            |            |            |
|            |             |            | Male   | 0.30 | 386 | 1.26 (0.75-2.11)      | 0.39       | 0.98       | 1.02 (0.31-3.30)             | 1.09 (0.41-2.92)  | 1.24 (0.47-3.27)  | 1.83 (0.64-5.26)  | 0.88                    | 1.00            |            |            |
| rs1465108  | MAOA        | X          | Female | 0.28 | 403 | 0.92 (0.63-1.49)      | 0.67       | 1.00       | 0.64 (0.27-1.53)             | 0.81 (0.40-1.64)  | 0.77 (0.26-2.26)  | 1.56 (0.74-3.27)  | 0.41                    | 0.93            |            |            |
|            |             |            | Male   | 0.30 | 386 | 1.26 (0.75-2.11)      | 0.39       | 0.98       | 1.02 (0.31-3.30)             | 1.09 (0.41-2.92)  | 1.24 (0.47-3.27)  | 1.83 (0.64-5.26)  | 0.88                    | 1.00            |            |            |
| rs5906957  | MAOA        | X          | Female | 0.28 | 403 | 0.91 (0.61-1.35)      | 0.64       | 1.00       | 0.64 (0.27-1.53)             | 0.79 (0.39-1.59)  | 0.77 (0.26-2.26)  | 1.56 (0.74-3.27)  | 0.40                    | 0.92            |            |            |
|            |             |            | Male   | 0.26 | 385 | 1.38 (0.81-2.36)      | 0.25       | 0.89       | 1.54 (0.46-5.11)             | 0.79 (0.28-2.28)  | 1.48 (0.54-4.16)  | 2.14 (0.74-6.21)  | 0.61                    | 0.95            |            |            |
| rs909525   | MAOA        | X          | Female | 0.23 | 403 | 0.99 (0.66-1.49)      | 0.97       | 0.97       | 0.70 (0.29-1.69)             | 0.97 (0.46-2.05)  | 0.95 (0.34-2.69)  | 1.39 (0.67-2.90)  | 0.70                    | 0.89            |            |            |
|            |             |            | Male   | 0.35 | 386 | 1.60 (0.97-2.63)      | 0.07       | 0.48       | 1.20 (0.39-3.72)             | 1.48 (0.59-3.74)  | 1.30 (0.50-3.33)  | 2.97 (1.02-8.65)  | 0.61                    | 0.95            |            |            |
| rs2283725  | MAOA        | X          | Female | 0.31 | 403 | 0.89 (0.61-1.31)      | 0.56       | 1.00       | 0.83 (0.38-1.79)             | 0.67 (0.34-1.31)  | 0.89 (0.32-2.47)  | 1.38 (0.67-2.85)  | 0.54                    | 0.89            |            |            |
|            |             |            | Male   | 0.35 | 386 | 1.60 (0.97-2.63)      | 0.07       | 0.48       | 1.20 (0.39-3.72)             | 1.48 (0.59-3.74)  | 1.30 (0.50-3.33)  | 2.97 (1.02-8.65)  | 0.61                    | 0.95            |            |            |
| rs3027399  | MAOA        | X          | Female | 0.31 | 403 | 0.89 (0.61-1.30)      | 0.54       | 1.00       | 0.83 (0.38-1.79)             | 0.67 (0.34-1.31)  | 0.89 (0.32-2.47)  | 1.33 (0.65-2.70)  | 0.58                    | 0.92            |            |            |
|            |             |            | Male   | 0.02 | 369 | NA                    | NA         | NA         | NA                           | NA                | NA                | NA                | NA                      | NA              |            |            |
| rs2205718  | MAOA        | X          | Female | 0.08 | 403 | 0.74 (0.36-1.54)      | 0.41       | 1.00       | 0.42 (0.09-2.00)             | 0.81 (0.24-2.67)  | 0.52 (0.06-4.52)  | 1.50 (0.36-6.27)  | 0.67                    | 0.95            |            |            |
|            |             |            | Male   | 0.31 | 386 | 1.19 (0.71-1.99)      | 0.52       | 0.99       | 1.53 (0.49-4.78)             | 0.76 (0.28-2.08)  | 1.14 (0.43-3.01)  | 1.68 (0.59-4.82)  | 0.71                    | 0.98            |            |            |
| rs2072743  | MAOA        | X          | Female | 0.29 | 403 | 0.94 (0.63-1.40)      | 0.76       | 1.00       | 0.73 (0.21-1.67)             | 0.91 (0.46-1.79)  | 0.83 (0.27-2.57)  | 1.29 (0.61-2.70)  | 0.78                    | 0.83            |            |            |
|            |             |            | Male   | 0.36 | 384 | 1.36 (0.83-2.25)      | 0.23       | 0.87       | 1.01 (0.31-3.29)             | 1.07 (0.42-2.71)  | 1.13 (0.44-2.89)  | 3.03 (1.04-8.82)  | 0.41                    | 0.78            |            |            |
| rs979606   | MAOA        | X          | Female | 0.33 | 403 | 0.89 (0.61-1.31)      | 0.56       | 1.00       | 0.98 (0.47-2.04)             | 0.72 (0.38-1.40)  | 0.93 (0.32-2.74)  | 1.05 (0.52-2.12)  | 0.88                    | 0.88            |            |            |
|            |             |            | Male   | 0.31 | 385 | 1.18 (0.70-1.97)      | 0.54       | 0.99       | 1.53 (0.49-4.78)             | 0.74 (0.27-2.08)  | 1.14 (0.43-3.00)  | 1.68 (0.59-4.82)  | 0.69                    | 0.97            |            |            |
| rs3027409  | MAOA        | X          | Female | 0.29 | 403 | 0.94 (0.63-1.40)      | 0.76       | 1.00       | 0.73 (0.21-1.67)             | 0.91 (0.46-1.79)  | 0.83 (0.27-2.57)  | 1.29 (0.61-2.70)  | 0.78                    | 0.83            |            |            |
|            |             |            | Male   | 0.05 | 386 | 2.09 (0.79-5.53)      | 0.15       | 0.77       | 2.91 (0.55-15.53)            | 0.98 (0.09-10.33) | 5.79 (1.04-32.27) | 0.20              | 0.53                    |                 |            |            |
| rs2064070  | MAOA        | X          | Female | 0.04 | 403 | 0.74 (0.27-2.01)      | 0.54       | 1.00       | 2.40 (0.64-8.97)             | NA                | 1.69 (0.17-16.86) | NA                | 0.03                    | 0.18            |            |            |
|            |             |            | Male   | 0.31 | 384 | 1.30 (0.78-2.18)      | 0.32       | 0.95       | 1.50 (0.48-4.69)             | 0.83 (0.30-2.27)  | 1.46 (0.56-3.81)  | 1.69 (0.59-4.83)  | 0.77                    | 0.99            |            |            |
| rs609257   | MAOA        | X          | Female | 0.30 | 402 | 1.03 (0.70-1.51)      | 0.89       | 1.00       | 0.72 (0.31-1.64)             | 0.93 (0.48-1.80)  | 0.83 (0.27-2.57)  | 1.65 (0.83-3.28)  | 0.43                    | 0.94            |            |            |
|            |             |            | Male   | 0.44 | 386 | 1.13 (0.70-1.85)      | 0.61       | 0.99       | 0.95 (0.31-2.91)             | 0.82 (0.33-2.01)  | 1.13 (0.46-2.78)  | 2.09 (0.73-6.05)  | 0.58                    | 0.94            |            |            |
| rs3027415  | MAOA        | X          | Female | 0.40 | 403 | 0.97 (0.68-1.37)      | 0.85       | 1.00       | 0.88 (0.44-1.77)             | 0.62 (0.33-1.17)  | 0.95 (0.36-2.54)  | 1.78 (0.91-3.48)  | 0.15                    | 0.63            |            |            |
|            |             |            | Male   | 0.21 | 386 | 0.77 (0.42-1.43)      | 0.40       | 0.98       | 0.58 (0.12-2.60)             | 0.74 (0.24-2.26)  | 0.99 (0.34-2.85)  | 0.69 (0.18-2.72)  | 0.95                    | 0.97            |            |            |
| rs3027416  | MAOA        | X          | Female | 0.24 | 401 | 1.06 (0.69-1.62)      | 0.79       | 1.00       | 1.31 (0.56-3.11)             | 0.74 (0.35-1.55)  | 1.88 (0.65-5.39)  | 0.99 (0.42-2.35)  | 0.51                    | 0.92            |            |            |
|            |             |            | Male   | 0.00 | NA  | NA                    | NA         | NA         | NA                           | NA                | NA                | NA                | NA                      | NA              |            |            |
| rs3027421  | MAOB        | X          | Female | 0.00 | NA  | NA                    | NA         | NA         | NA                           | NA                | NA                | NA                | NA                      | NA              |            |            |
|            |             |            | Male   | 0.00 | NA  | NA                    | NA         | NA         | NA                           | NA                | NA                | NA                | NA                      | NA              |            |            |
| rs3027431  | MAOB        | X          | Female | 0.01 | 403 | 1.96 (0.34-11.29)     | 0.47       | 1.00       | NA                           | NA                | NA                | NA                | NA                      | 0.27            | NA         |            |
|            |             |            | Male   | 0.00 | NA  | NA                    | NA         | NA         | NA                           | NA                | NA                | NA                | NA                      | NA              | NA         |            |
| rs12558036 | MAOB        | X          | Female | 0.01 | 403 | 1.33 (0.26-6.91)      | 0.74       | 1.00       | NA                           | NA                | NA                | NA                | NA                      | NA              | NA         |            |
|            |             |            | Male   | 0.00 | NA  | NA                    | NA         | NA         | NA                           | NA                | NA                | NA                | NA                      | NA              | NA         |            |
| rs1040398  | MAOB        | X          | Female | 0.01 | 403 | 1.96 (0.34-11.29)     | 0.47       | 1.00       | NA                           | NA                | NA                | NA                | NA                      | NA              | NA         |            |
|            |             |            | Male   | 0.00 | NA  | NA                    | NA         | NA         | NA                           | NA                | NA                | NA                | NA                      | NA              | NA         |            |
| rs1799836  | MAOB        | X          | Female | 0.01 | 403 | 1.96 (0.34-11.29)     | 0.47       | 1.00       | 1.23 (0.12-12.63)            | NA                | NA                | NA                | NA                      | 0.27            | NA         |            |
|            |             |            | Male   | 0.44 | 386 | 1.09 (0.67-1.78)      | 0.73       | 0.99       | 0.80 (0.26-2.44)             | 0.71 (0.29-1.76)  | 1.17 (0.47-2.93)  | 2.38 (0.80-7.04)  | 0.35                    | 0.70            |            |            |
| rs10521432 | MAOB        | X          | Female | 0.48 | 403 | 0.92 (0.65-1.32)      | 0.67       | 1.00       | 1.14 (0.56-2.30)             | 0.67 (0.36-1.24)  | 2.75 (0.93-8.14)  | 0.70 (0.34-1.42)  | 0.10                    | 0.49            |            |            |
|            |             |            | Male   | 0.27 | 386 | 1.03 (0.60-1.77)      | 0.91       | 0.91       | 0.75 (0.19-2.98)             | 0.74 (0.28-1.94)  | 1.15 (0.42-3.16)  | 1.78 (0.60-5.25)  | 0.65                    | 0.96            |            |            |
| rs7888450  | MAOB        | X          | Female | 0.30 | 402 | 0.98 (0.66-1.46)      | 0.92       | 0.99       | 1.55 (0.72-3.34)             | 0.60 (0.29-1.22)  | 1.75 (0.56-5.48)  | 0.88 (0.40-1.98)  | 0.22                    | 0.76            |            |            |
|            |             |            | Male   | 0.00 | NA  | NA                    |            |            |                              |                   |                   |                   |                         |                 |            |            |

| SNP       | Gene Region | Chromosome | Gender | MAF  | N   | Marginal Effect  |            |            | Treatment Stratified Effects |                              |                          |                          | Test of Interaction |            |
|-----------|-------------|------------|--------|------|-----|------------------|------------|------------|------------------------------|------------------------------|--------------------------|--------------------------|---------------------|------------|
|           |             |            |        |      |     | SNP OR (95% CI)  | Observed P | Adjusted P | Placebo<br>SNP OR (95% CI)   | Bupropion<br>SNP OR (95% CI) | Patch<br>SNP OR (95% CI) | Spray<br>SNP OR (95% CI) | Observed P          | Adjusted P |
| rs5945185 | FLNA        | X          | Female | 0.10 | 374 | 0.66 (0.34-1.29) | 0.21       | 0.50       | 0.73 (0.16-3.31)             | 0.83 (0.31-2.21)             | NA                       | 1.07 (0.31-3.74)         | 0.13                | 0.33       |
|           |             |            | Male   | 0.20 | 349 | 0.67 (0.34-1.34) | 0.25       | 0.56       | 0.22 (0.03-1.82)             | 1.47 (0.51-4.27)             | 0.64 (0.16-2.47)         | 0.30 (0.04-2.48)         | 0.25                | 0.42       |
| rs1064816 | FLNA        | X          | Female | 0.23 | 378 | 0.91 (0.60-1.39) | 0.67       | 0.71       | 1.46 (0.67-3.19)             | 0.67 (0.32-1.42)             | 0.97 (0.34-2.76)         | 0.78 (0.31-1.95)         | 0.54                | 0.54       |
|           |             |            | Male   | 0.22 | 236 | 1.33 (0.40-4.44) | 0.65       | 0.88       | NA                           | 2.40 (0.49-11.80)            | 1.20 (0.11-12.60)        | NA                       | 0.50                | 0.50       |
| rs17428   | FLNA        | X          | Female | 0.24 | 383 | 0.89 (0.58-1.36) | 0.59       | 0.85       | 0.60 (0.24-1.54)             | 0.91 (0.48-1.71)             | 0.54 (0.14-2.10)         | 1.65 (0.67-4.06)         | 0.39                | 0.70       |
|           |             |            | Male   | 0.19 | 354 | 0.68 (0.34-1.35) | 0.26       | 0.55       | 0.25 (0.03-2.08)             | 1.51 (0.52-4.37)             | 0.58 (0.15-2.22)         | 0.29 (0.04-2.47)         | 0.27                | 0.43       |
|           |             |            | Female | 0.22 | 379 | 0.93 (0.61-1.42) | 0.73       | 0.73       | 1.55 (0.70-3.45)             | 0.69 (0.33-1.45)             | 0.97 (0.34-2.76)         | 0.78 (0.31-1.95)         | 0.51                | 0.52       |
