# Supplementary material
Source: PubMed Central journal article supplement (PMC3208134)

Plotted SNPs

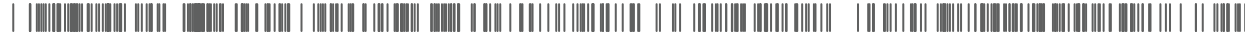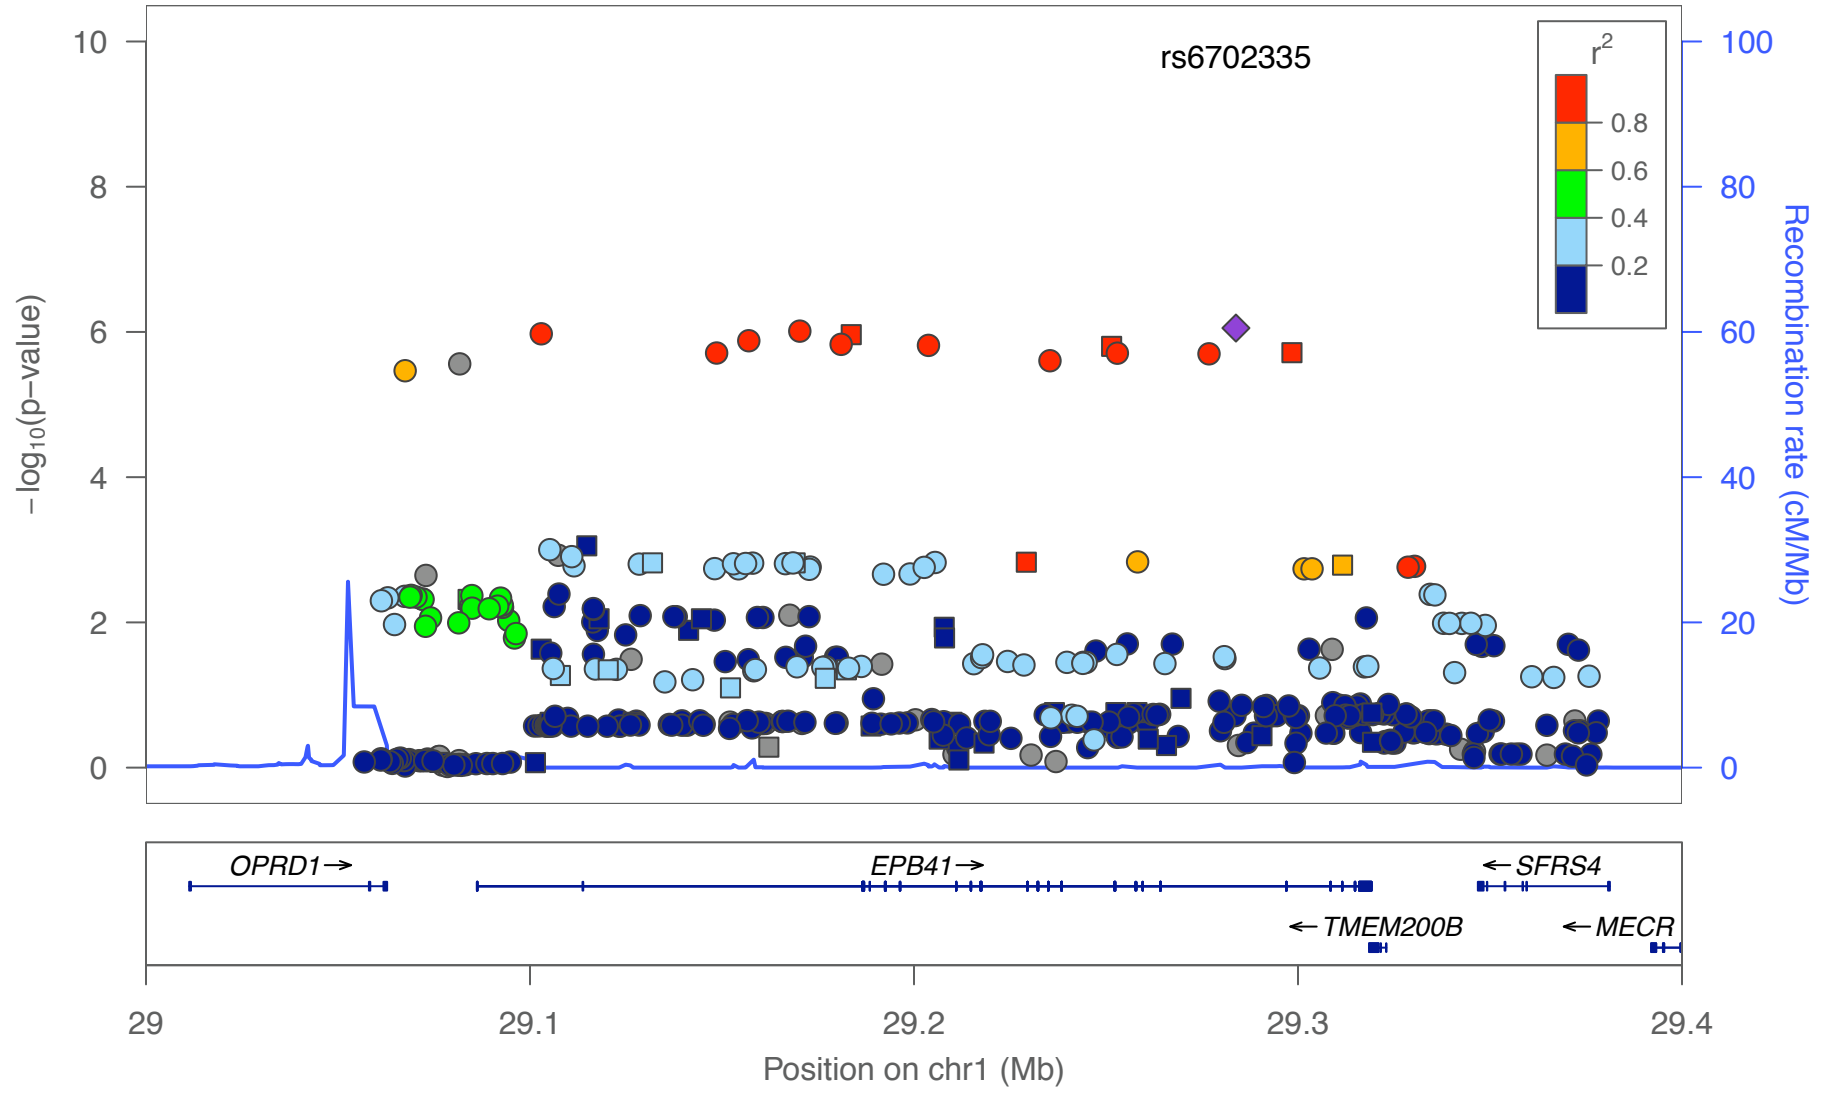

Supplement: NIHMS305090-supplement-1.pdf [file NIHMS305090-supplement-1.pdf]

Plotted SNPs

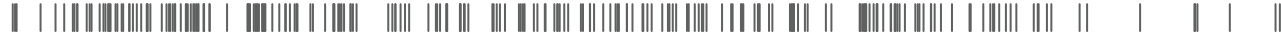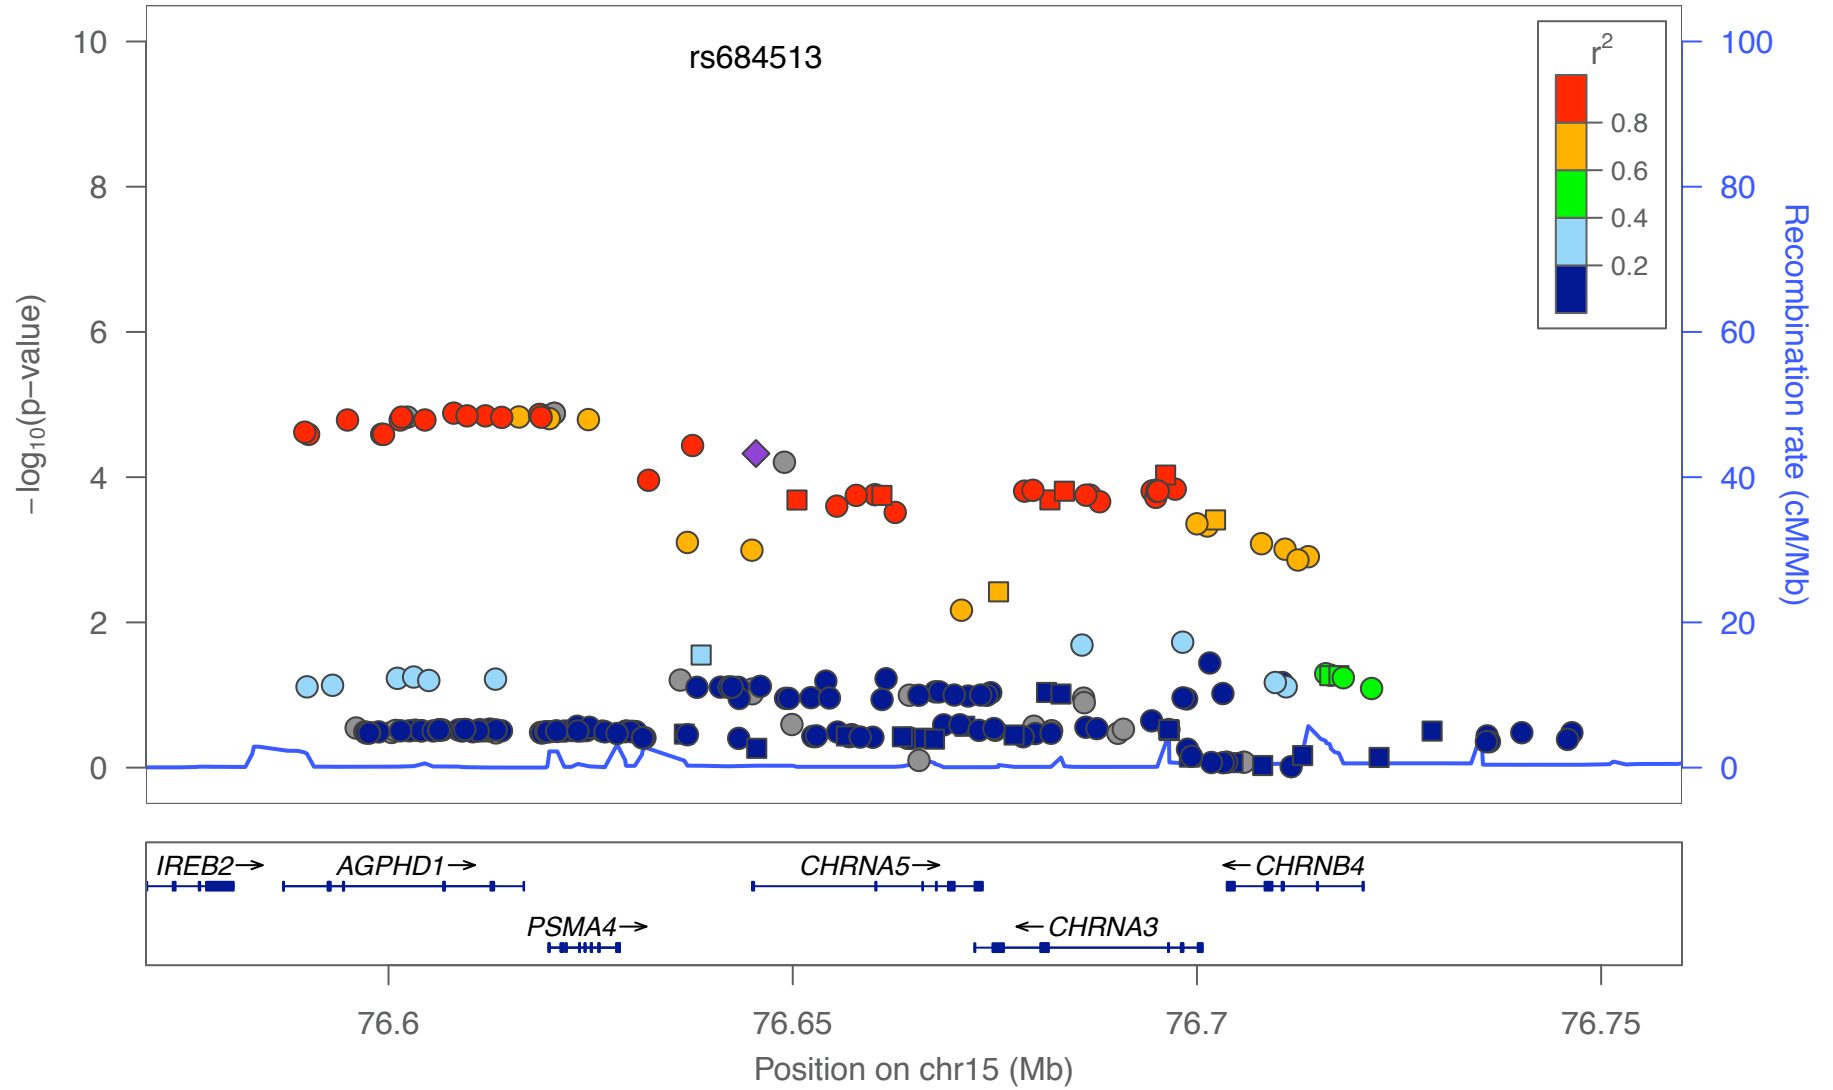

Supplement: NIHMS305090-supplement-2.pdf [file NIHMS305090-supplement-2.pdf]
